# Supplementary material for: Reactions of linear conjugated dienone structures with arenes under superelectrophilic activation conditions. An experimental and theoretical study of intermediate multicentered electrophilic species
Source: Royal Society of Chemistry journal article supplement (doi:10.1039/d2nj01828d), 2022-01-01

**Reactions of linear conjugated dienone structures with arenes under  
superelectrophilic activation. Experimental and theoretical study of  
intermediate multicentered electrophilic species**

Matvey A. Kochurin,<sup>a</sup> Alina R. Ismagilova,<sup>b</sup> Dmitry N. Zakusilo,<sup>b</sup> Olesya V. Khoroshilova,<sup>a</sup>  
Irina A. Boyarskaya,<sup>a</sup> Aleksander V. Vasilyev<sup>a,b</sup> \*

<sup>a</sup>*Department of Organic Chemistry, Institute of Chemistry, Saint Petersburg State University,  
Universitetskaya nab., 7/9, Saint Petersburg, 199034, Russia*

<sup>b</sup>*Department of Chemistry, Saint Petersburg State Forest Technical University, Institutsky per.,  
5, Saint Petersburg, 194021, Russia*

**Corresponding Author**

\* E-mails: [aleksvasil@mail.ru](mailto:aleksvasil@mail.ru), [a.vasilyev@spbu.ru](mailto:a.vasilyev@spbu.ru) (Aleksander V. Vasilyev)

**Contents**

|                                                                                                                                                                                          |     |
|------------------------------------------------------------------------------------------------------------------------------------------------------------------------------------------|-----|
| I. Synthesis and characterization of starting compounds <b>1a-h</b> .....                                                                                                                | S2  |
| II. Copies of NMR spectra of compounds <b>1-6</b> , and cation <b>A1</b> .....                                                                                                           | S7  |
| III. X-Ray data of compounds <b>2a</b> , <b>3h</b> , <b>6a</b> .....                                                                                                                     | S43 |
| IV. Details of DFT calculations of cations <b>A-D</b> , intermediate $\pi$ - and $\sigma$ -complexes leading to<br>indanes <i>cis-/trans-3a</i> , and indanes <i>cis-/trans-3a</i> ..... | S57 |

## I. Synthesis and characterization of starting compounds 1a-h

### Synthesis of 1,5-diarylpenta-2,4-dien-1-ones (1a-e)

39.5 mg (0.98 mmol) of NaOH, 3 ml of water and 2 ml of EtOH were placed in a round bottom 20 ml flask with stirring on a magnetic stirrer. 180 mg (1.5 mmol, 1.1 eq) of the corresponding acetophenone (**1a**) were added to the reaction mixture. Then 180 mg (1.37 mmol) of cinnamic aldehyde (or 221 mg (1.37 mmol) of 3-(2-methoxyphenyl)prop-2-enal for synthesis of **1e**) were added in portions. The reaction mixture was stirred for 36 h at room temperature, the resulting precipitate was filtered on a Büchner funnel and recrystallized from EtOH. The reaction products yields were 76-95%.

### Synthesis of 5-(4-methylphenyl)-1-phenylpent-2,4-dien-1-one (**1f**)

The synthesis of **1f** was carried out in several stages according to scheme below.

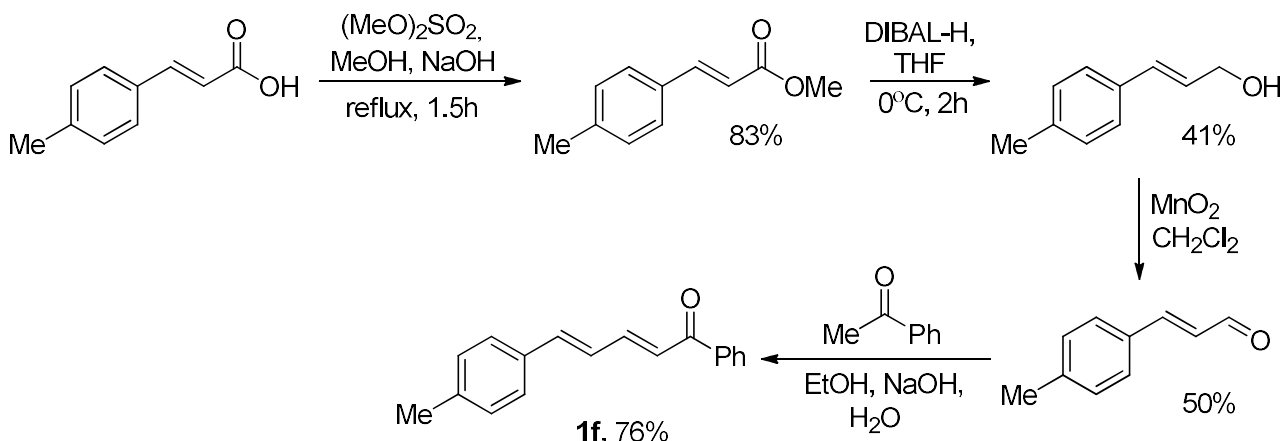

### Synthesis of methyl (*E*)-3-(4-methylphenyl)prop-2-enoate.

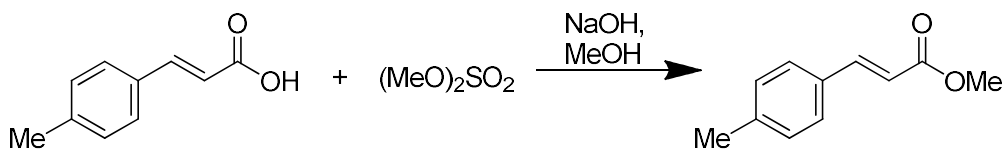

Solution of 1.65 g (10 mmol) (*E*)-3-(4-methylphenyl)prop-2-enoic acid in 15 ml of MeOH was prepared under refluxing in a round bottom 20 ml flask equipped with condenser and calcium chloride tube. The resulting solution was cooled to  $\sim 30^\circ\text{C}$  and of solution of 0.6 g (15 mmol) of NaOH and 15 ml of MeOH were added. The reaction mixture was refluxing till homogenization, then it was cooled down to  $\sim 40^\circ\text{C}$  and 2.25 ml (3 g, 24 mmol) of  $(\text{MeO})_2\text{SO}_2$  were added. The reaction mixture was refluxing for 1.5 h. Then the mixture was cooled to room temperature and poured into 100 ml of  $\text{H}_2\text{O}$ . The precipitated white solid was filtered off and washed with  $\text{H}_2\text{O}$  ( $2 \times 10$  ml). The yield of the target compound was 1.5 g (83%).

### Synthesis of (*E*)-3-(4-methylphenyl)prop-2-en-1-ol.

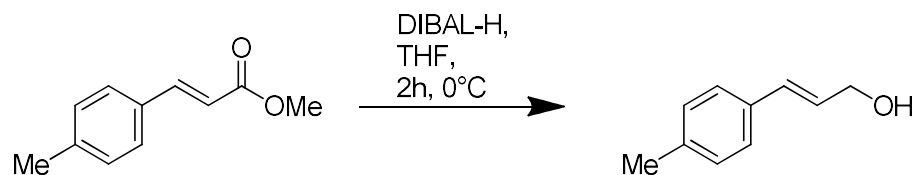

30 ml of THF and 1.5 g (8.52 mmol) of methyl (*E*)-3-(4-methylphenyl)prop-2-enoate were placed in a three-necked 100 ml round-bottomed flask equipped in 1-st throat with an argon inlet, in the 2-nd with an argon outlet with bubbler and in the 3-rd throat with a septum. The obtained solution was cooled in an ice bath to 0°C under the argon atmosphere. Then 20.5 ml (2.9 g, 20.45 mmol) of a 1M solution of DIBAL-H in CH<sub>2</sub>Cl<sub>2</sub> was added portion wise to the mixture. In the course of the synthesis after 1h, 1 ml (0.89 g, 1 mmol) of a 1M solution of DIBAL-H in CH<sub>2</sub>Cl<sub>2</sub> was additionally added. The reaction mixture was stirred at 0°C for 2 h. Then it was poured into 150 ml of H<sub>2</sub>O, extracted with Et<sub>2</sub>O (3×100 ml), combined extracts were dried with Na<sub>2</sub>SO<sub>4</sub> and the solvent was evaporated under reduced pressure. The yield of the target compound was 0.62 g (41%).

### Synthesis of (*E*)-3-(4-methylphenyl)prop-2-enal.

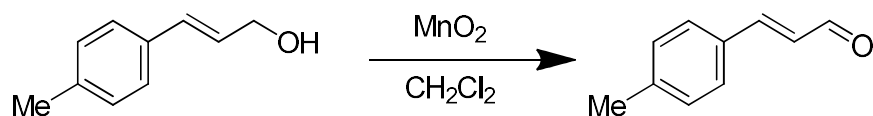

A mixture of (*E*)-3-(4-methylphenyl)prop-2-en-1-ol (620 mg, 4.18 mmol), manganese dioxide MnO<sub>2</sub> (2.92 g, 33.49 mmol) and dichloromethane (40 ml) was stirred at room temperature for 5 days. The reaction mass was filtered through 20 mm layer of silica gel in a glass filter, silica gel was washed with dichloromethane (3×20 ml). The solvent was evaporated under reduced pressure. The residue was dried in vacuum. The yield of the target compound was 350 mg (50%).

### Synthesis of 5-(4-methylphenyl)-1-phenylpent-2,4-dien-1-one (**1f**)

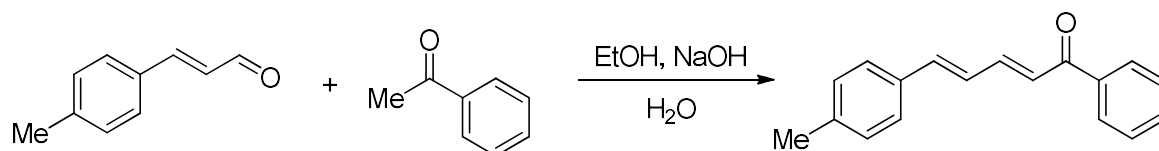

The compound **1f** was obtained according to the general procedure for the synthesis of dienones **1a-e** as described above.

### Synthesis of 5-phenylpent-2,4-dienoic acid (**1g**)

A solution of malonic acid 4.7 g (45 mmol), 5.25 ml (38 mmol) of cinnamic aldehyde in 10 ml of pyridine containing two drops of piperidine was stirred at 100°C for 4 h. Then it was poured into concentrated hydrochloric acid (30 ml), the formed precipitate was filtered off and recrystallized from ethanol. The yield of the target compound was 4 g (60%).

### Synthesis of methyl 5-phenylpent-2,4-dienoate (**1h**)

A mixture of 5-phenylpent-2,4-dienoic acid **1g** (1 g, 5.7 mmol) and NaHCO<sub>3</sub> (0.48 g, 5.7 mmol, 1 eq) in MeOH (20 ml) was boiled for 1 h in a round-bottom 50 ml flask equipped with a reflux condenser and a calcium chloride tube until the acid was completely dissolved. The solution was cooled to room temperature, and (MeO)<sub>2</sub>SO<sub>2</sub> (1 ml, 6.1 mmol) was added. The reaction mixture was refluxing for 1 h, cooled and poured into 150 ml of Et<sub>2</sub>O. The ether solution was consequently washed with water (2×50 ml), saturated aqueous solution of NaOH (3×50 ml), with water (2×50 ml), dried with Na<sub>2</sub>SO<sub>4</sub>. The solvent was distilled off under reduced pressure. The yield of the target compound was 0.96 g (90%).

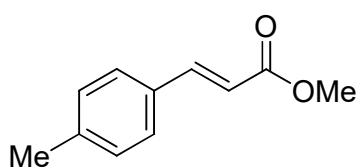

*Methyl (E)-3-(4-methylphenyl)propenoate*.<sup>1</sup> Colorless solid. M.p. 55-57°C, <sup>1</sup>H NMR (CDCl<sub>3</sub>, 400 MHz) δ, ppm: 2.37 (s, 3H, Me), 3.80 (s, 3H, MeO), 6.39 (d, 1H, *J* 16 Hz, =CH-), 7.19 (d, 2H, *J* 8 Hz), 7.42 (d, 2H, *J* 8 Hz), 7.67 (d, 1H, *J* 16 Hz, =CH-).

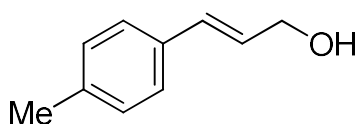

*3-(4-Methylphenyl)prop-2-en-1-ol*.<sup>2</sup> Oil. <sup>1</sup>H NMR (CDCl<sub>3</sub>, 400 MHz) δ, ppm: 2.34 (s, 3H, Me), 4.31 (dd, 2H, *J* 6, 1 Hz, CH<sub>2</sub>), 6.32 (dt, 1H, *J* 16, 6 Hz, =CH-), 6.59 (d, 1H, *J* 16 Hz, =CH), 7.13 (d, 2H, *J* 8 Hz), 7.29 (d, 2H, *J* 8 Hz). <sup>13</sup>C NMR (CDCl<sub>3</sub>, 100 MHz) δ, ppm: 21.2, 63.8, 126.4, 127.5, 129.3, 131.2, 133.9, 137.5.

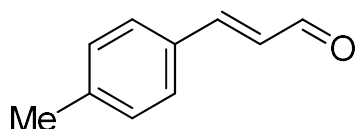

*3-(4-Methylphenyl)propenal*.<sup>3</sup> Yellow solid. <sup>1</sup>H NMR (CDCl<sub>3</sub>, 400 MHz) δ, ppm: 2.40 (s, 3H, Me), 6.68 (dd, 1H, -CH=, *J* 16, 8 Hz), 7.24 (d, 2H, *J* 8 Hz), 7.46 (m, 3H), 9.69 (d, 1H, *J* 8 Hz). <sup>13</sup>C NMR (CDCl<sub>3</sub>, 100 MHz) δ, ppm: 21.7, 127.9, 128.7, 130.0, 131.5, 142.1, 153.0, 193.9 (-CHO).

<sup>1</sup> Myrboh B., Ila H., Junjappa H. *J. Org. Chem.* **1983**. 48, 26,5327-5332.

<sup>2</sup> Solladie-Cavallo A. *J. Org. Chem.* **1994**. 59, 11, 3241.

<sup>3</sup> Attenburrow J., Cameron A.F.B., Chapman J.H., et al. *J. Chem. Soc.* **1952**. 1094.

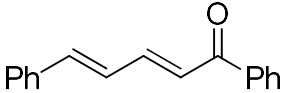
 1,5-Diphenylpent-2,4-dien-1-one (**1a**).<sup>4</sup> Yellow solid. <sup>1</sup>H NMR (CDCl<sub>3</sub>, 400 MHz) δ, ppm: 7.02-7.04 (m, 2H), 7.10 (d, 1H, *J* 15 Hz), 7.33-7.40 (m, 3H), 7.47-7.52 (m, 4H), 7.55-7.64 (m, 2H), 7.97-8.00 (m, 2H). <sup>13</sup>C NMR (CDCl<sub>3</sub>, 100 MHz) δ, ppm: 125.5, 127.0, 127.3, 128.4, 128.6, 128.9, 129.2, 132.7, 136.2, 138.3, 141.9, 144.8, 190.5.

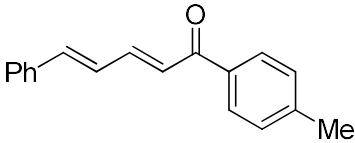
 1-(4-Methylphenyl)-5-phenylpent-2,4-dien-1-one (**1b**).<sup>5</sup> Yellow solid. <sup>1</sup>H NMR (CDCl<sub>3</sub>, 400 MHz) δ, ppm: 2.43 (s, 3H, Me), 7.01-7.03 (m, 2H), 7.10 (d, 1H, *J* 15 Hz), 7.26-7.39 (m, 5H), 7.49-7.51 (m, 2H), 7.60 (ddd, 1H, *J* 15, 8, 3 Hz), 7.89-7.91 (m, 2H). <sup>13</sup>C NMR (CDCl<sub>3</sub>, 100 MHz) δ, ppm: 21.7, 125.5, 127.1, 127.3, 128.6, 128.9, 129.2, 129.3, 135.7, 136.2, 141.6, 143.5, 144.4, 190.0.

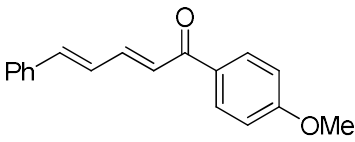
 1-(4-Methoxyphenyl)-5-phenylpent-2,4-dien-1-one (**1c**).<sup>6</sup> Yellow solid. M. p. 88-90 °C. <sup>1</sup>H NMR (CDCl<sub>3</sub>, 400 MHz) δ, ppm: 3.88 (s, 3H, Me), 6.98 (m, 4H), 7.11 (d, 1H, *J* 15 Hz), 7.34 (m, 3H), 7.51 (m, 2H), 7.60 (m, 1H). <sup>13</sup>C NMR (CDCl<sub>3</sub>, 100 MHz) δ, ppm: 55.5, 113.8, 125.3, 127.1, 127.2, 128.9, 129.1, 130.7, 131.2, 136.3, 141.4, 144.0, 163.4, 188.7.

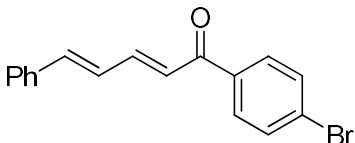
 1-(4-Bromophenyl)-5-phenylpent-2,4-dien-1-one (**1d**).<sup>7</sup> Yellow solid substance. M. p. 140-142 °C. <sup>1</sup>H NMR (CDCl<sub>3</sub>, 400 MHz) δ, ppm: 7.08 (m, 3H), 7.35 (m, 3H), 7.50 (m, 2H), 7.60 (m, 3H), 7.84 (m, 2H). <sup>13</sup>C NMR (CDCl<sub>3</sub>, 100 MHz) δ, ppm: 124.8, 126.8, 127.4, 127.7, 128.9, 129.4, 129.9, 131.9, 136.0, 137.0, 142.4, 145.4, 189.3.

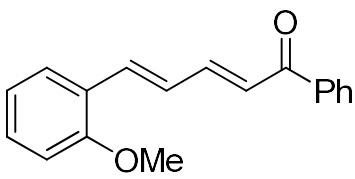
 5-(2-Methoxyphenyl)-1-phenylpent-2,4-dien-1-one (**1e**).<sup>8</sup> Yellow solid. <sup>1</sup>H NMR (CDCl<sub>3</sub>, 400 MHz) δ, ppm: 3.88 (s, 3H), 6.90 (d, 1H, *J* 8 Hz), 6.96 (t, 1H, *J* 7 Hz), 7.04-7.12 (m, 2H), 7.27-7.32 (m, 1H), 7.35-7.39 (m, 1H), 7.48 (t, 2H, *J* 7 Hz), 7.52-7.57 (m, 2H), 7.63 (dd, 1H, *J* 15, 11 Hz), 7.96-7.98 (m, 2H). <sup>13</sup>C NMR (CDCl<sub>3</sub>, 100 MHz) δ, ppm: 55.5, 111.2, 120.8, 124.9, 125.1, 127.6, 128.4, 128.6, 130.4, 132.5, 137.3, 138.4, 146.1, 157.6, 190.8.

<sup>4</sup> Ratheesh Kumar V.K., Gopidas K.R. *Tetrahedron Lett.* **2011**, 52, 3102–3105.

<sup>5</sup> Santos C.M.M., Silva A.M.S., Cavaleiro J.A.S., et al. *Eur. J. Org. Chem.* **2007**, 17, 2877–2887.

<sup>6</sup> Pal, R.; Mandal T., K.; Guha, C.; Mallik A.K. *Indian Chem. Soc.* **2012**, 88, 11, 2012.

<sup>7</sup> Oliva C.G., Silva A.M.S., Resende D.I.S.P., et al. *Eur. J. Org. Chem.* **2010**, 3449–3458.

<sup>8</sup> Li Z., Song W. *J. Chem. Res.* **2018**, 42, 7, 347–349.

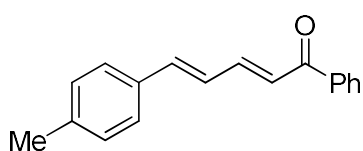

5-(4-Methylphenyl)-1-phenylpent-2,4-dien-1-one (**1f**).<sup>9</sup> Light-yellow solid. <sup>1</sup>H NMR (CDCl<sub>3</sub>, 400 MHz) δ, ppm: 2.37 (s, 3H, Me), 6.69 (m, 2H), 7.07 (d, 1H, *J* 15 Hz), 7.18 (d, 2H, *J* 8 Hz), 7.40 (d, 2H, *J* 8 Hz), 7.49 (t, 2H, *J* 8 Hz), 7.6 (m, 2H), 7.97 (d, 2H, *J* 7 Hz). <sup>13</sup>C NMR (CDCl<sub>3</sub>, 100 MHz) δ, ppm: 21.5, 125.1, 126.2, 127.4, 128.5, 128.7, 129.7, 132.7, 133.6, 138.5, 139.7, 142.2, 145.3, 190.7.

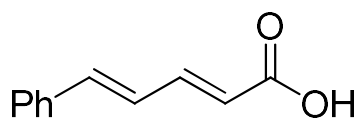

5-Phenylpent-2,4-diene acid (**1g**).<sup>10</sup> Solid substance. M. p. 164-167 °C. <sup>1</sup>H NMR (CDCl<sub>3</sub>, 500 MHz) δ, ppm: 6.01 (d, 1H, *J* 15 Hz, CH), 6.88-6.98 (m, 2H), 7.31-7.58 (m, 4H), 7.49 (d, 1H, *J* 7 Hz, CH). <sup>13</sup>C NMR (CDCl<sub>3</sub>, 125 MHz) δ, ppm: 120.2, 126.0, 127.3, 128.9, 129.3, 135.8, 141.6, 146.9, 171.9. MS, *m/z* (I<sub>rel.</sub>, %): 174 *M*<sup>+</sup> (25), 129 (100), 115 (8), 102 (8), 77 (9), 51 (8).

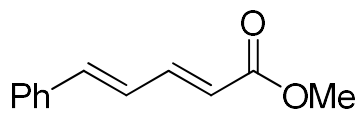

Methyl 5-phenylpent-2,4-dienoate (**1h**).<sup>11</sup> Solid substance. <sup>1</sup>H NMR (CDCl<sub>3</sub>, 500 MHz) δ, ppm: 3.77 (s, 3H, MeO), 6.0 (d, 1H, *J* 15 Hz, =CH), 6.87-6.92 (m, 2H, CH), 7.31-7.37 (m, 3H), 7.43-7.48 (m, 3H); <sup>13</sup>C NMR (CDCl<sub>3</sub>, 125 MHz) δ, ppm: 51.6, 120.9, 126.3, 127.2, 128.9, 129.1, 136.1, 140.6, 144.9, 167.9; MS, *m/z* (I<sub>rel.</sub>, %): 188 *M*<sup>+</sup> (25), 157 (20), 129 (100), 115 (8), 102 (8), 77 (9), 51 (8).

<sup>9</sup> Santos C.M.M., Silva A.M.S., Cavaleiro J.A.S., et al. *Eur. J. Org. Chem.* **2007**. 2877–2887.

<sup>10</sup> Kokotos G., Hsu Y., Burke J.E., et al. *J. Med. Chem.* **2010**. 53, 9, 3602–3610.

<sup>11</sup> El-batta A., Jiang C., Zhao W., et al. *J. Org. Chem.* **2007**. 72, 5244–5259.

## II. Copies of NMR spectra of compounds

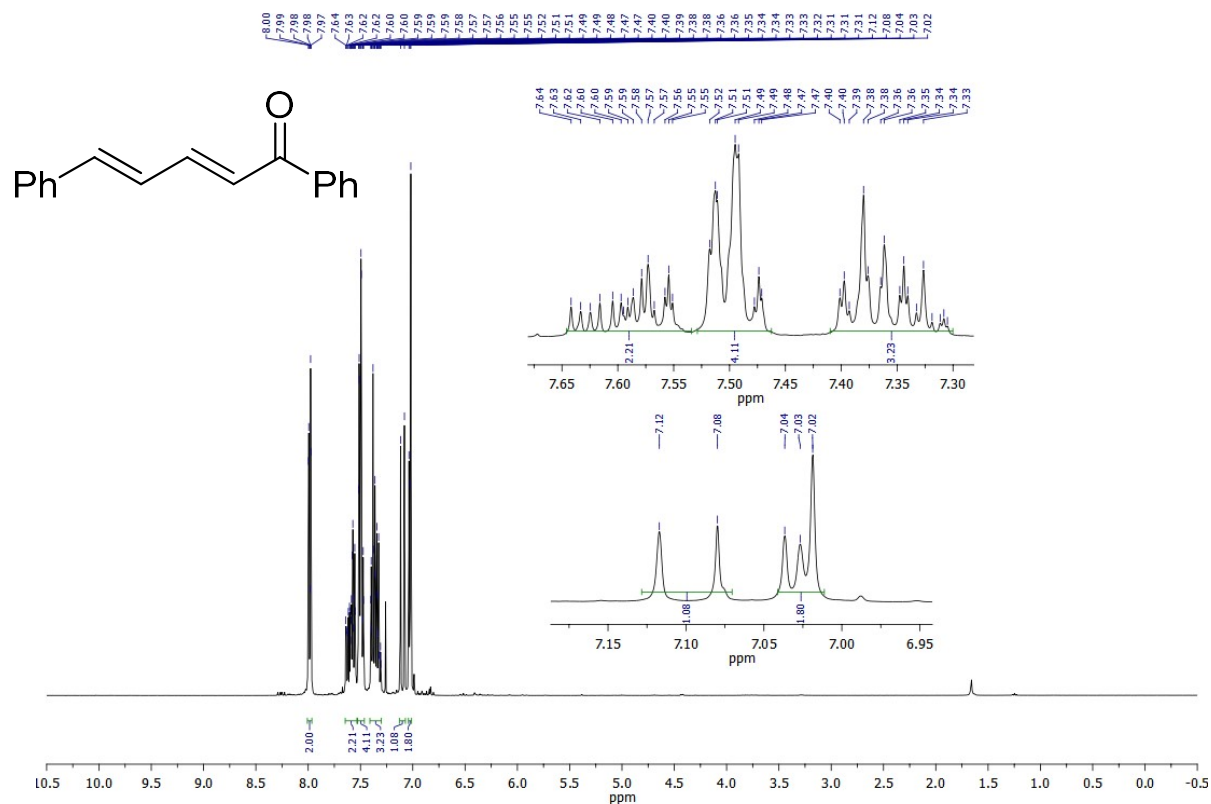

Fig. S1. <sup>1</sup>H NMR spectrum of the compound **1a** (CDCl<sub>3</sub>, 400 MHz).

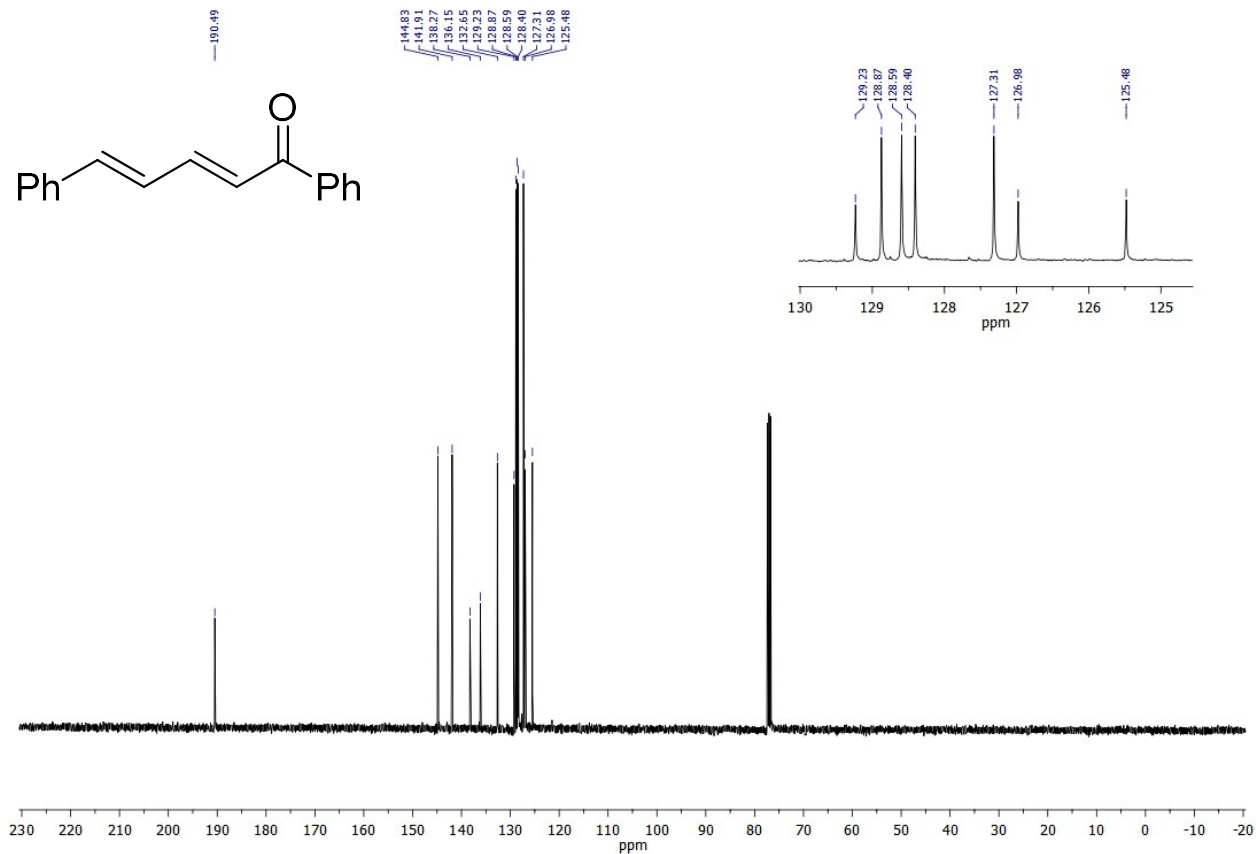

Fig. S2. <sup>13</sup>C NMR spectrum of the compound **1a** (CDCl<sub>3</sub>, 101 MHz).

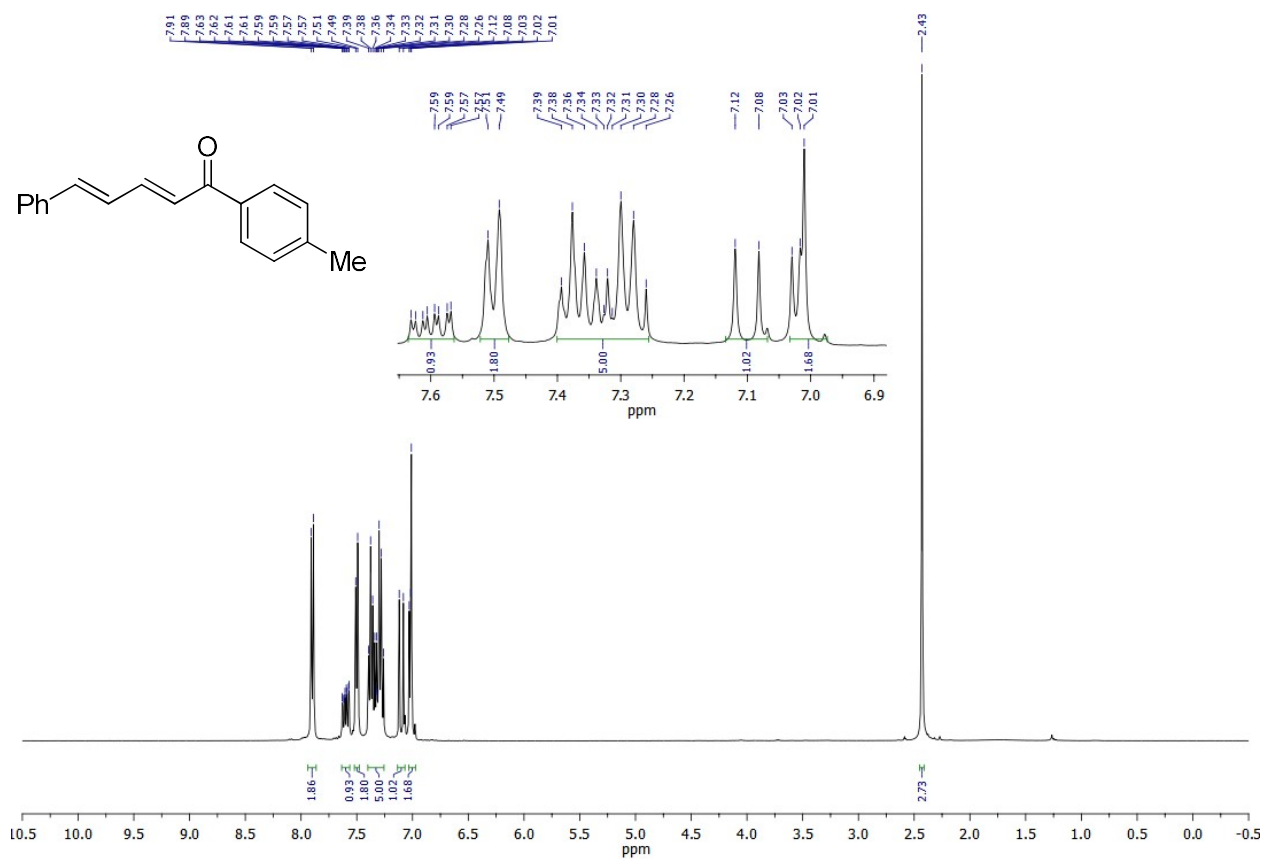

Fig. S3.  $^1\text{H}$  NMR spectrum of the compound **1b** (CDCl<sub>3</sub>, 400 MHz).

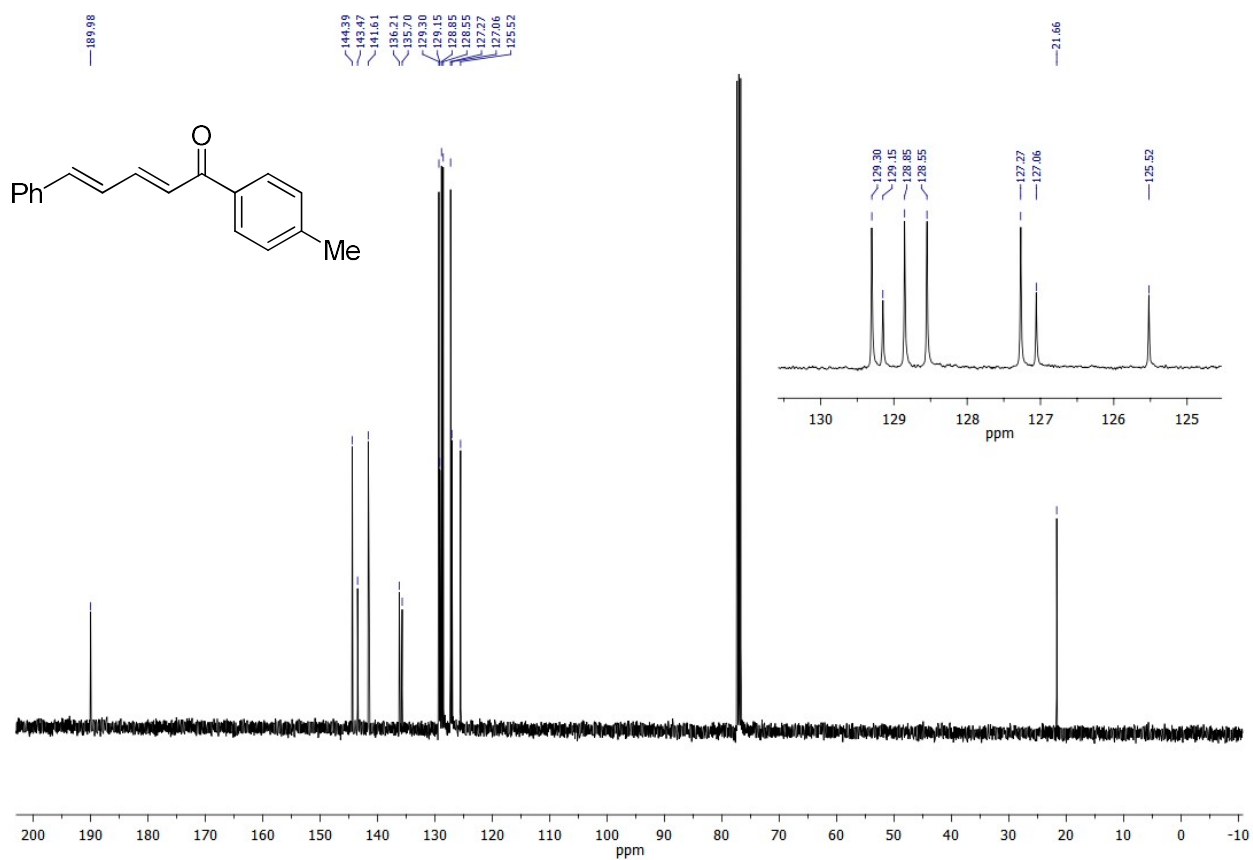

Fig. S4.  $^{13}\text{C}$  NMR spectrum of the compound **1b** (CDCl<sub>3</sub>, 101 MHz).



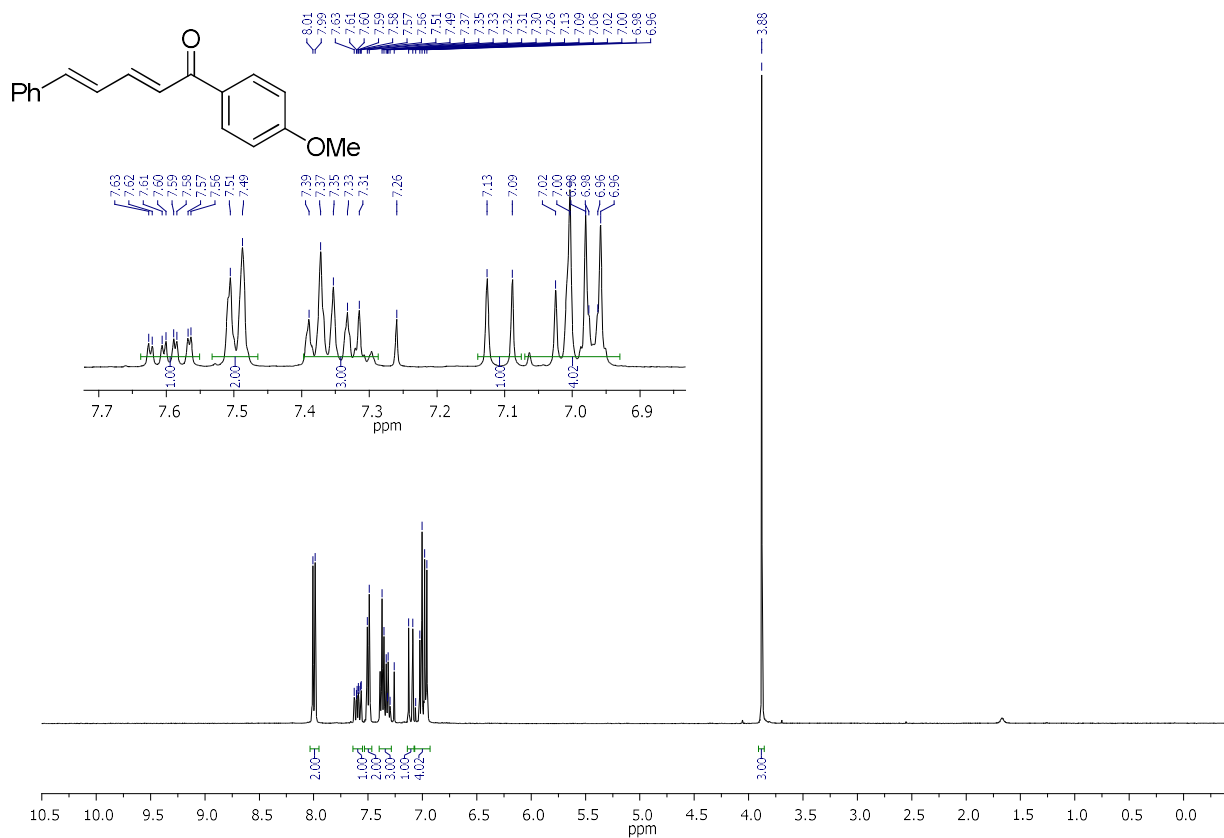

Fig. S5.  $^1\text{H NMR}$  spectrum of the compound **1c** (CDCl<sub>3</sub>, 400 MHz).

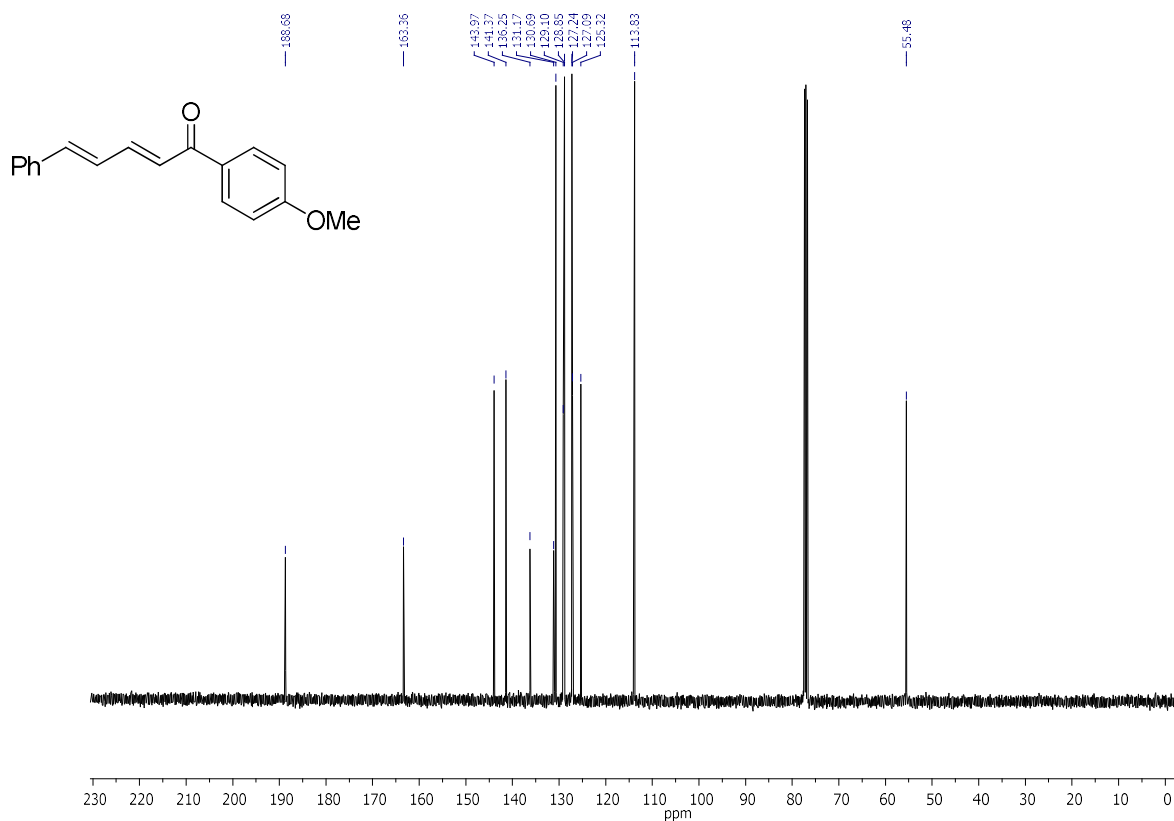

Fig. S6.  $^{13}\text{C NMR}$  spectrum of the compound **1c** (CDCl<sub>3</sub>, 101 MHz).

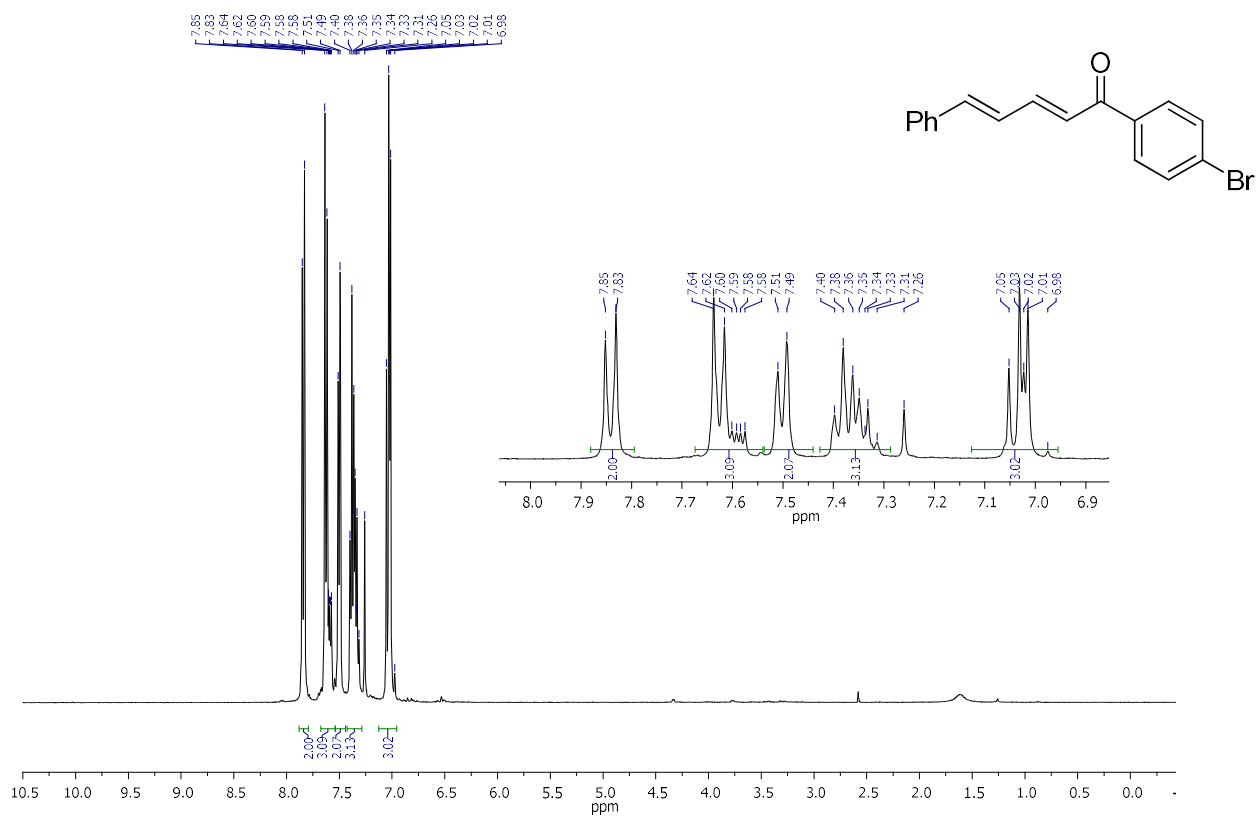

Fig. S7. <sup>1</sup>H NMR spectrum of the compound **1d** (CDCl<sub>3</sub>, 400 MHz).

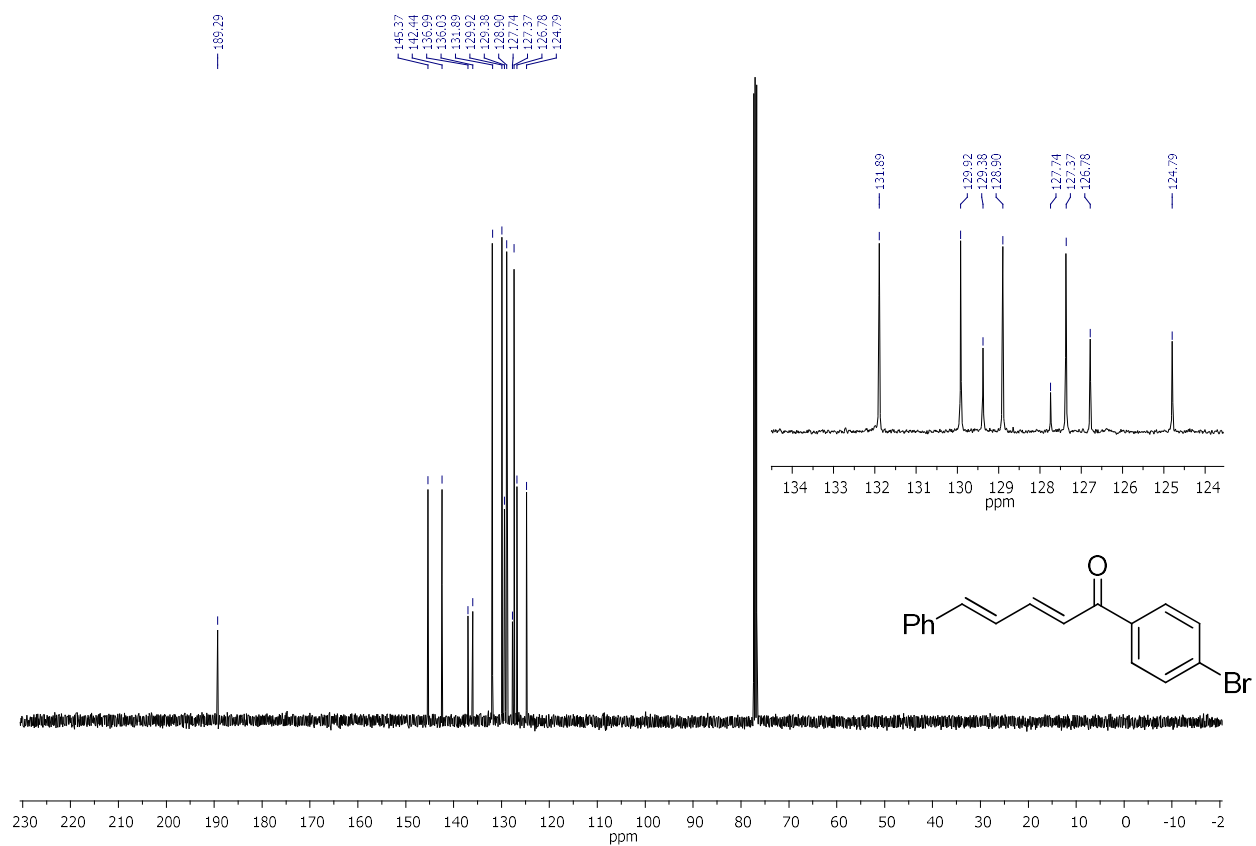

Fig. S8. <sup>13</sup>C NMR spectrum of the compound **1d** (CDCl<sub>3</sub>, 101 MHz).

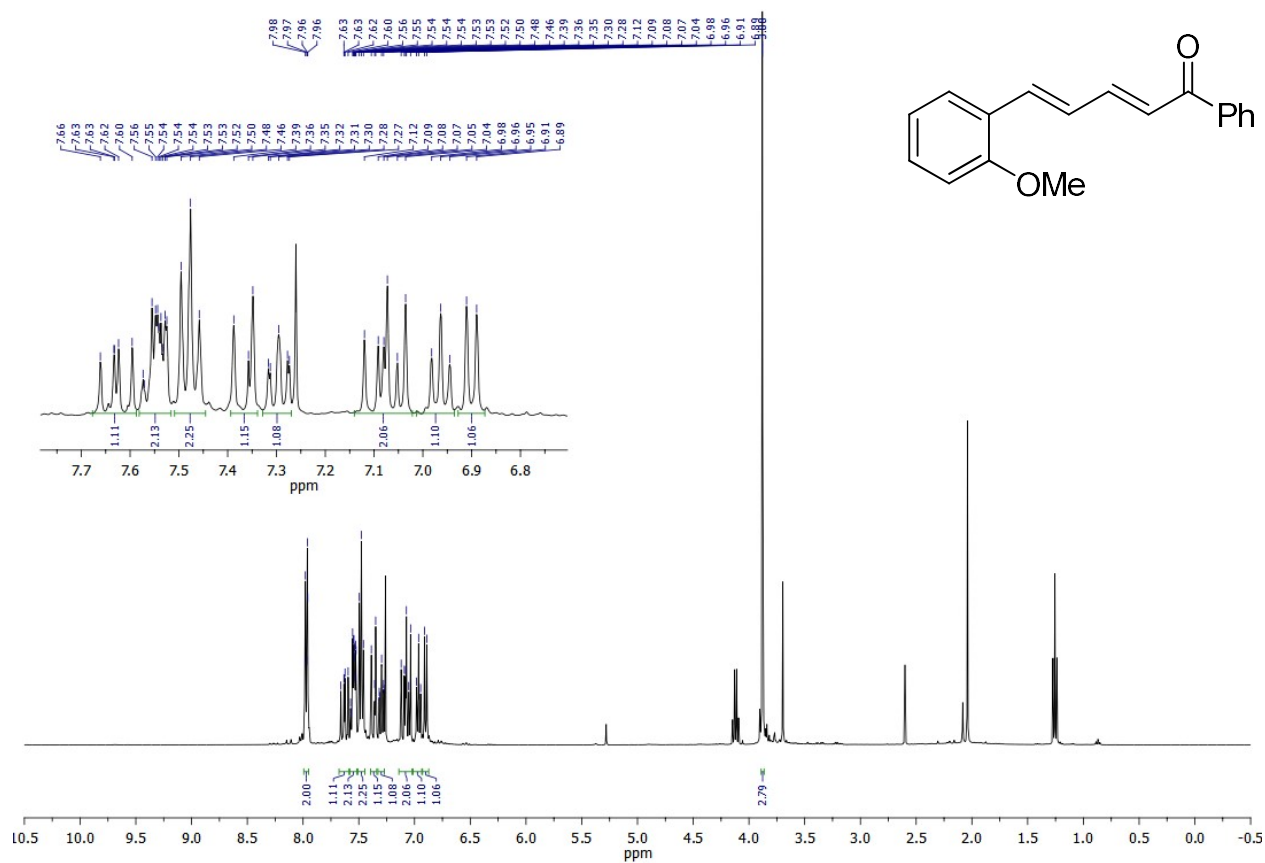

Fig. S9. <sup>1</sup>H NMR spectrum of the compound **1e** (CDCl<sub>3</sub>, 400 MHz).

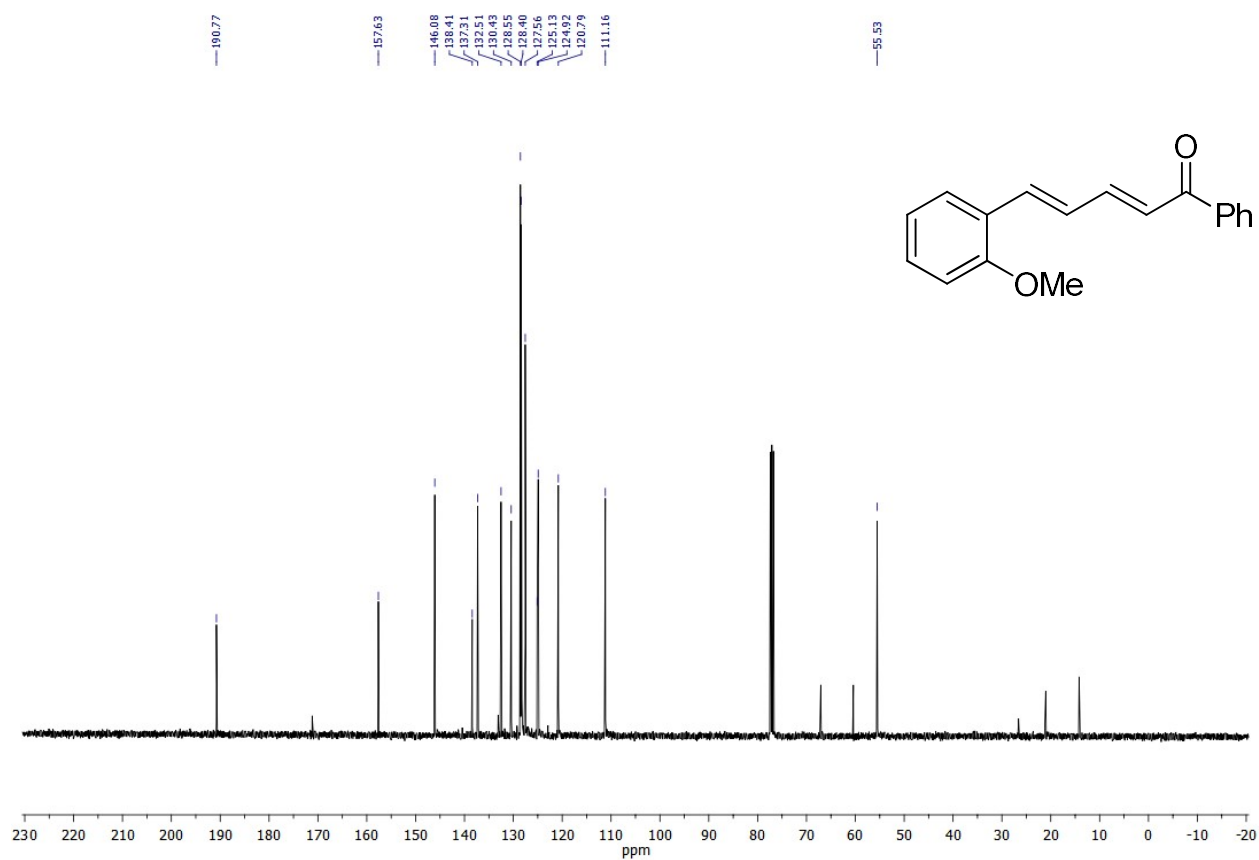

Fig. S10. <sup>13</sup>C NMR spectrum of the compound **1e** (CDCl<sub>3</sub>, 101 MHz).

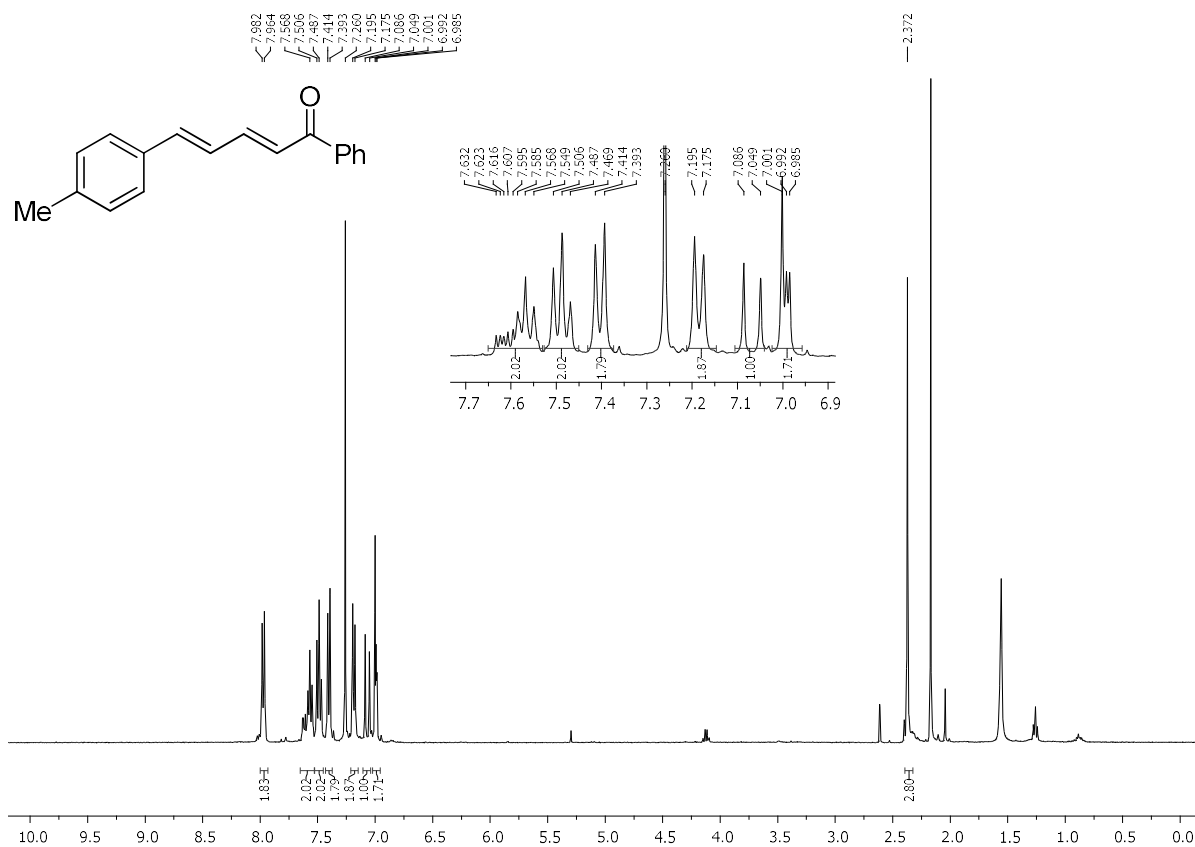

Fig. S11. <sup>1</sup>H NMR spectrum of the compound **1f** (CDCl<sub>3</sub>, 400 MHz).

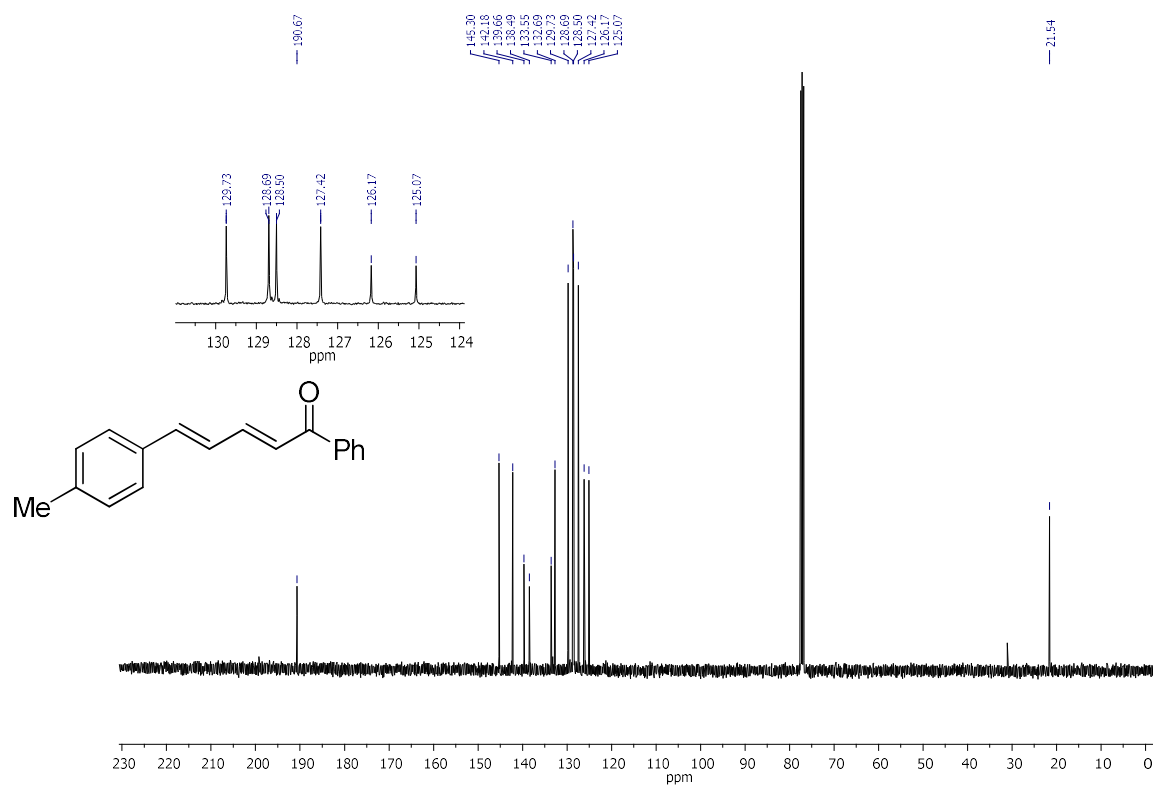

Fig. S12. <sup>13</sup>C NMR spectrum of the compound **1f** (CDCl<sub>3</sub>, 101 MHz).

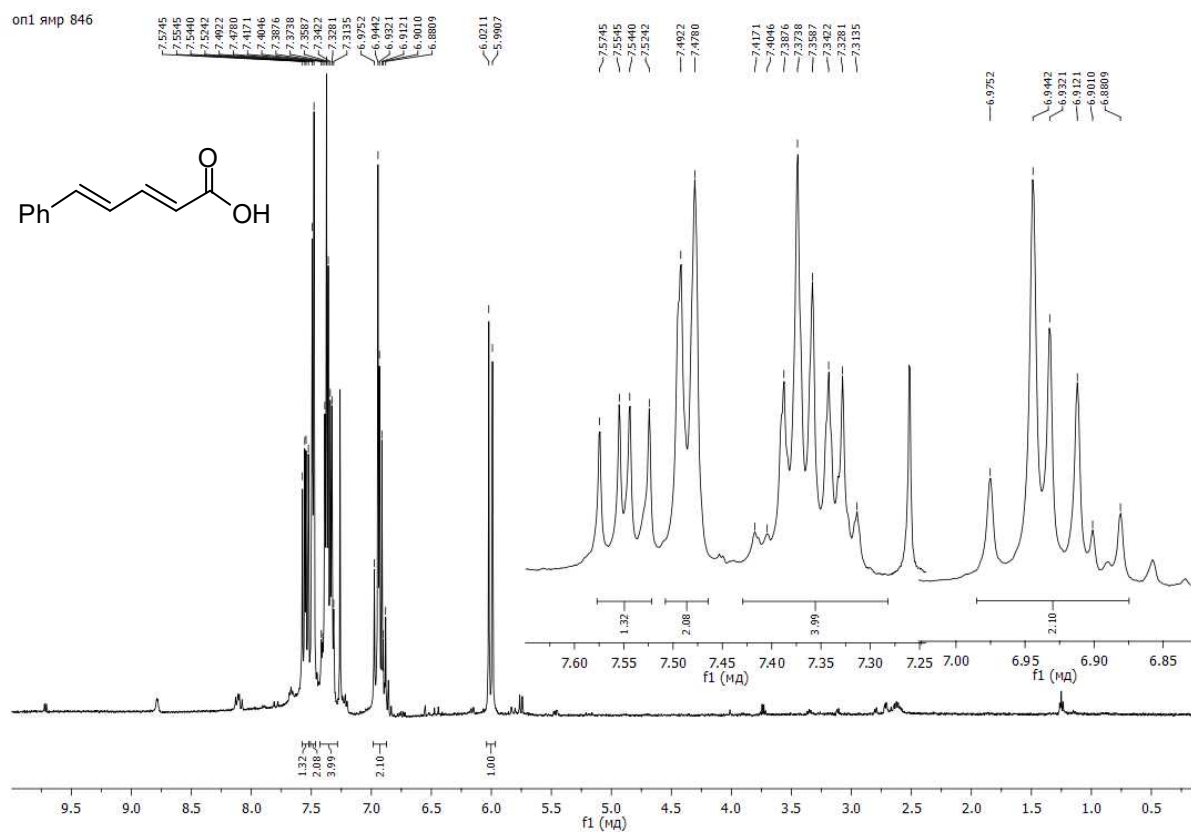

Fig. S13.  $^1\text{H}$  NMR spectrum of the compound **1g** ( $\text{CDCl}_3$ , 400 MHz).

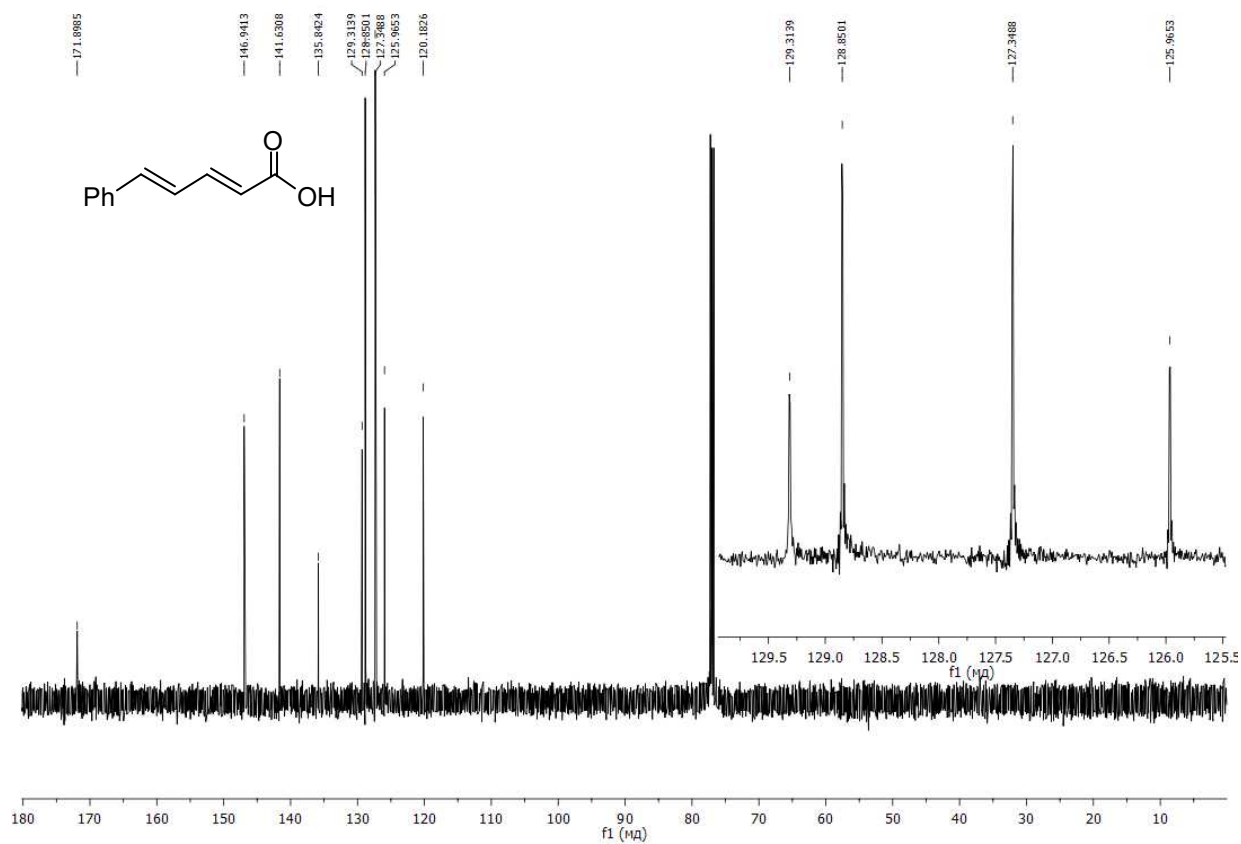

Fig. S14.  $^{13}\text{C}$  NMR spectrum of the compound **1g** ( $\text{CDCl}_3$ , 101 MHz).

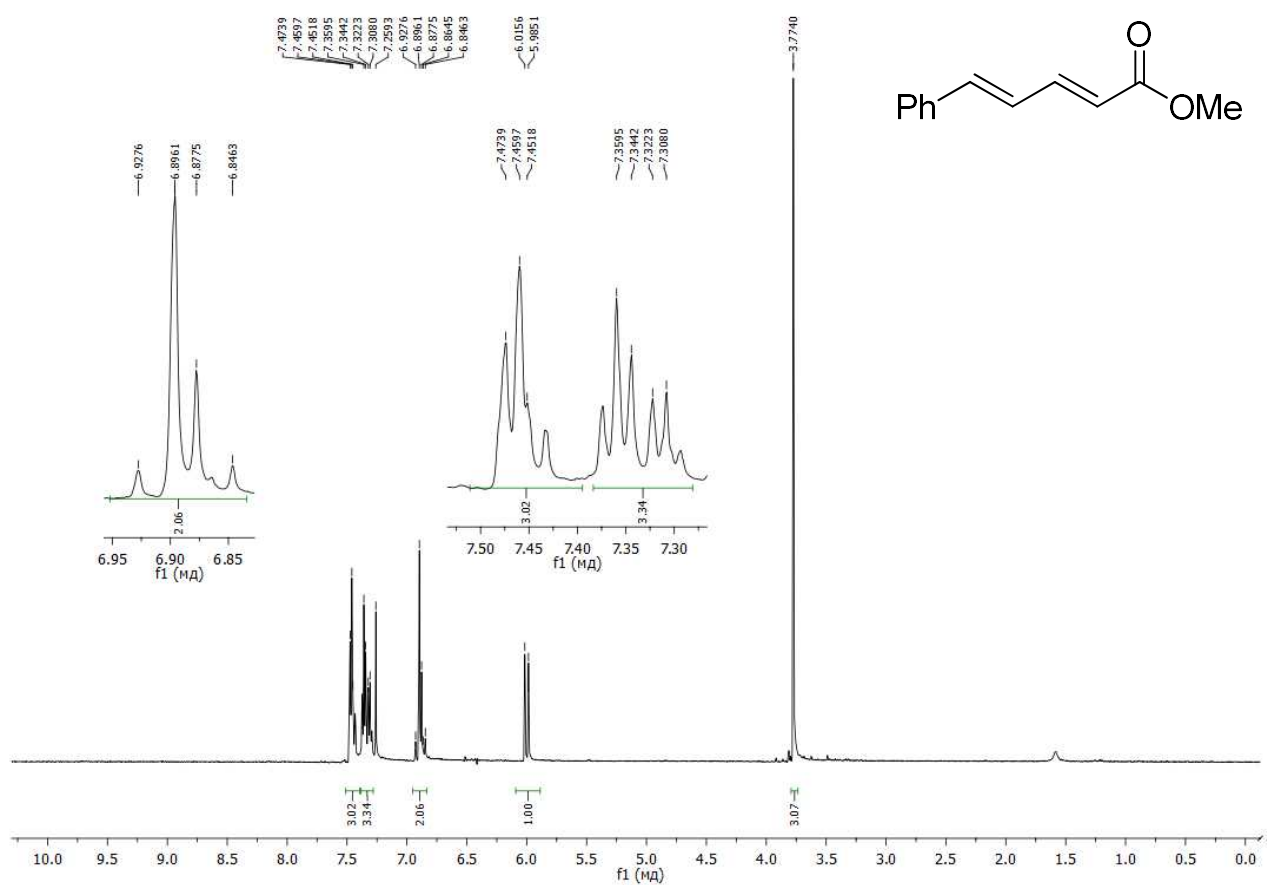

Fig. S15. <sup>1</sup>H NMR spectrum of the compound **1h** (CDCl<sub>3</sub>, 500 MHz).

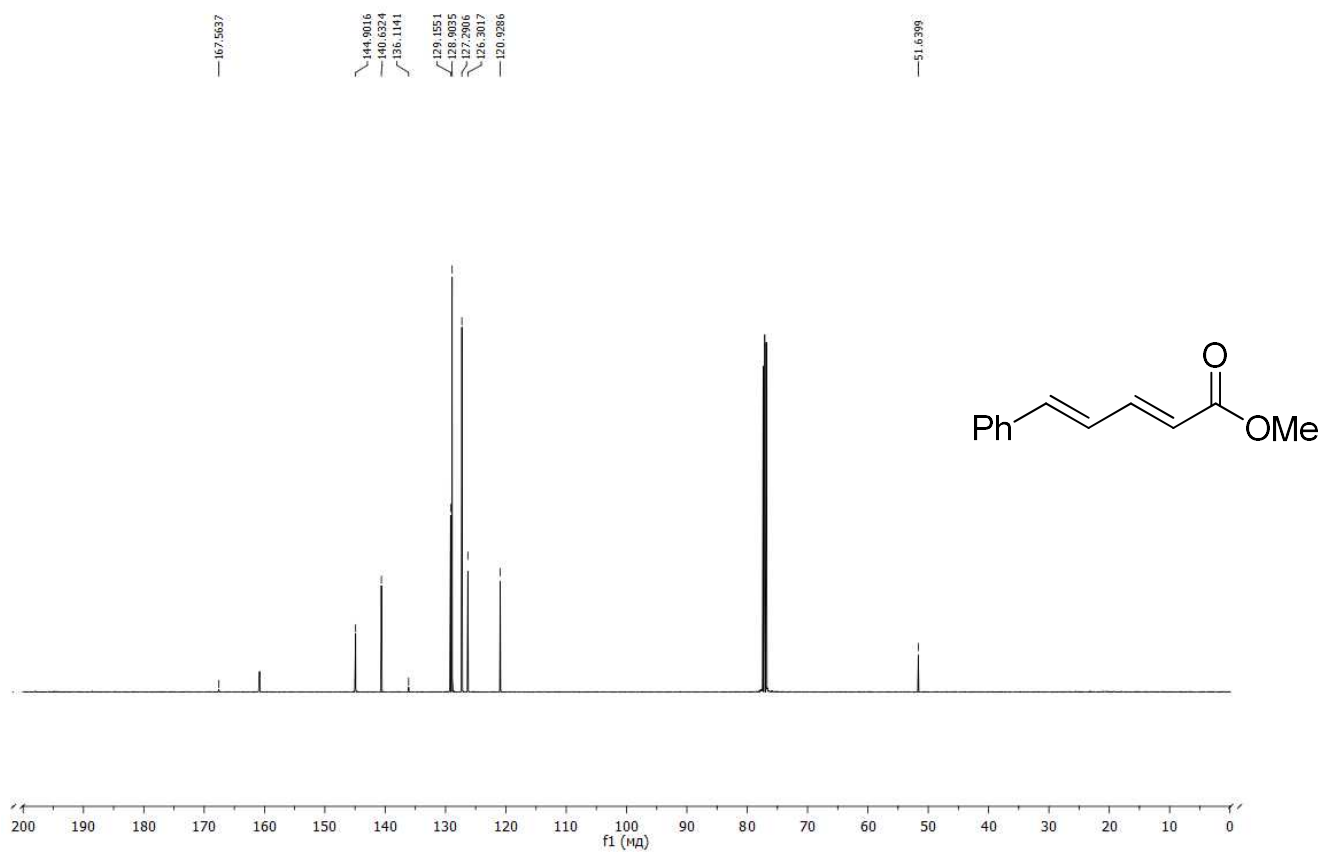

Fig. S16. <sup>13</sup>C NMR spectrum of the compound **1h** (CDCl<sub>3</sub>, 125 MHz).

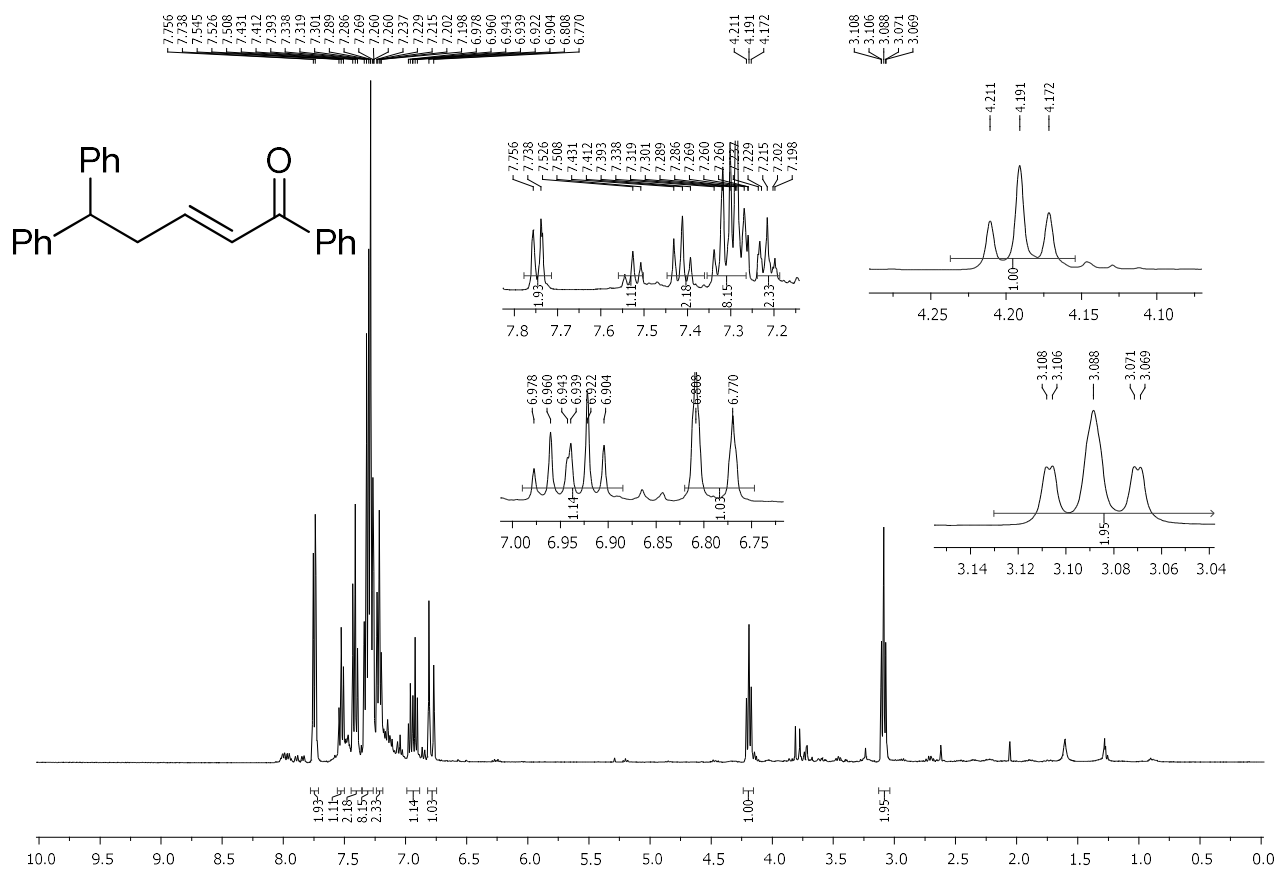

Fig. S17. <sup>1</sup>H NMR spectrum of the compound **2a** (CDCl<sub>3</sub>, 400 MHz).

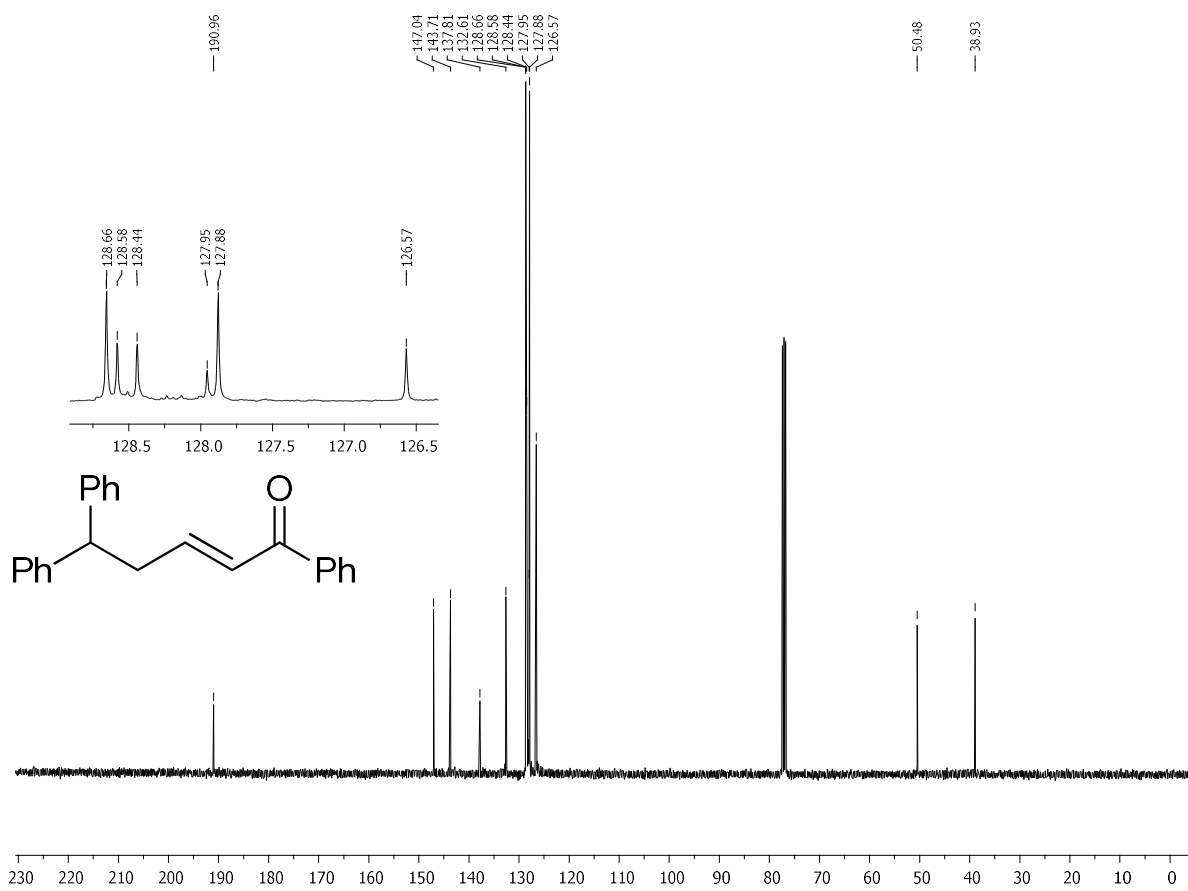

Fig. S18. <sup>13</sup>C NMR spectrum of the compound **2a** (CDCl<sub>3</sub>, 101 MHz).

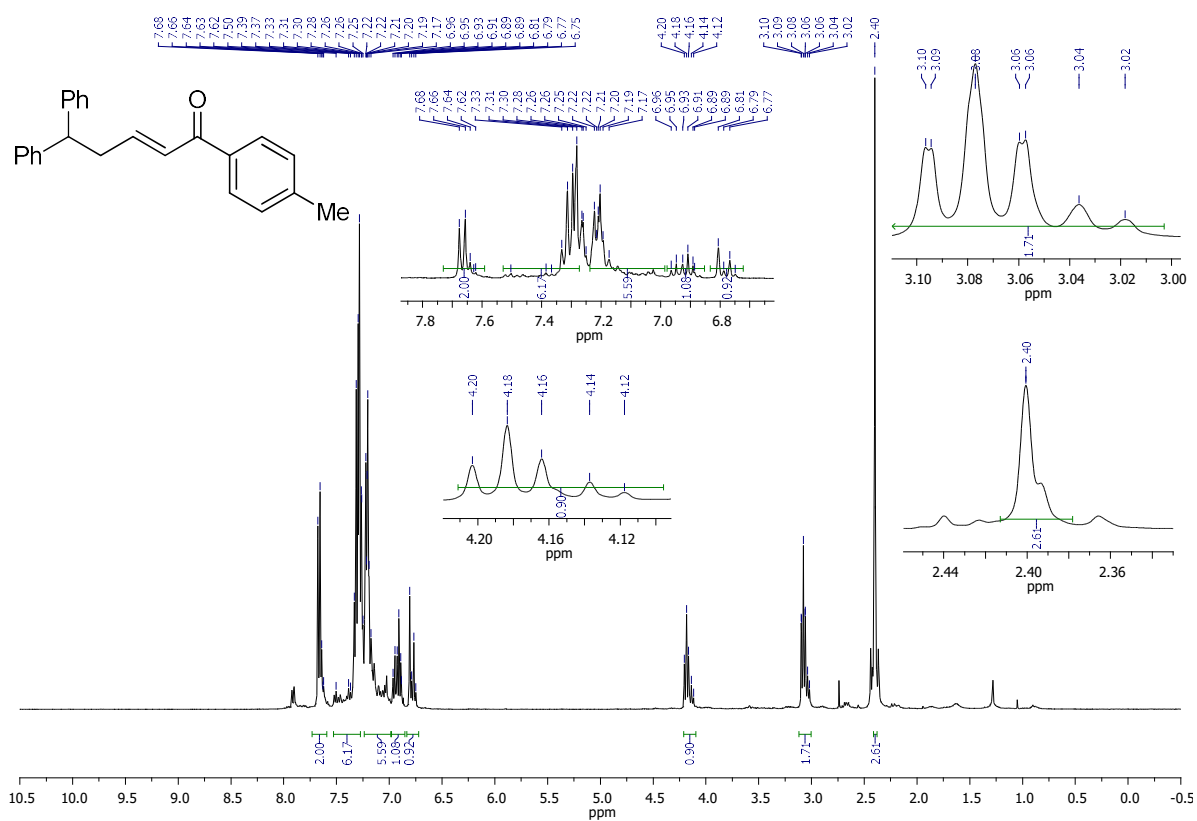

Fig. S19. <sup>1</sup>H NMR spectrum of the compound **2b** (CDCl<sub>3</sub>, 400 MHz).

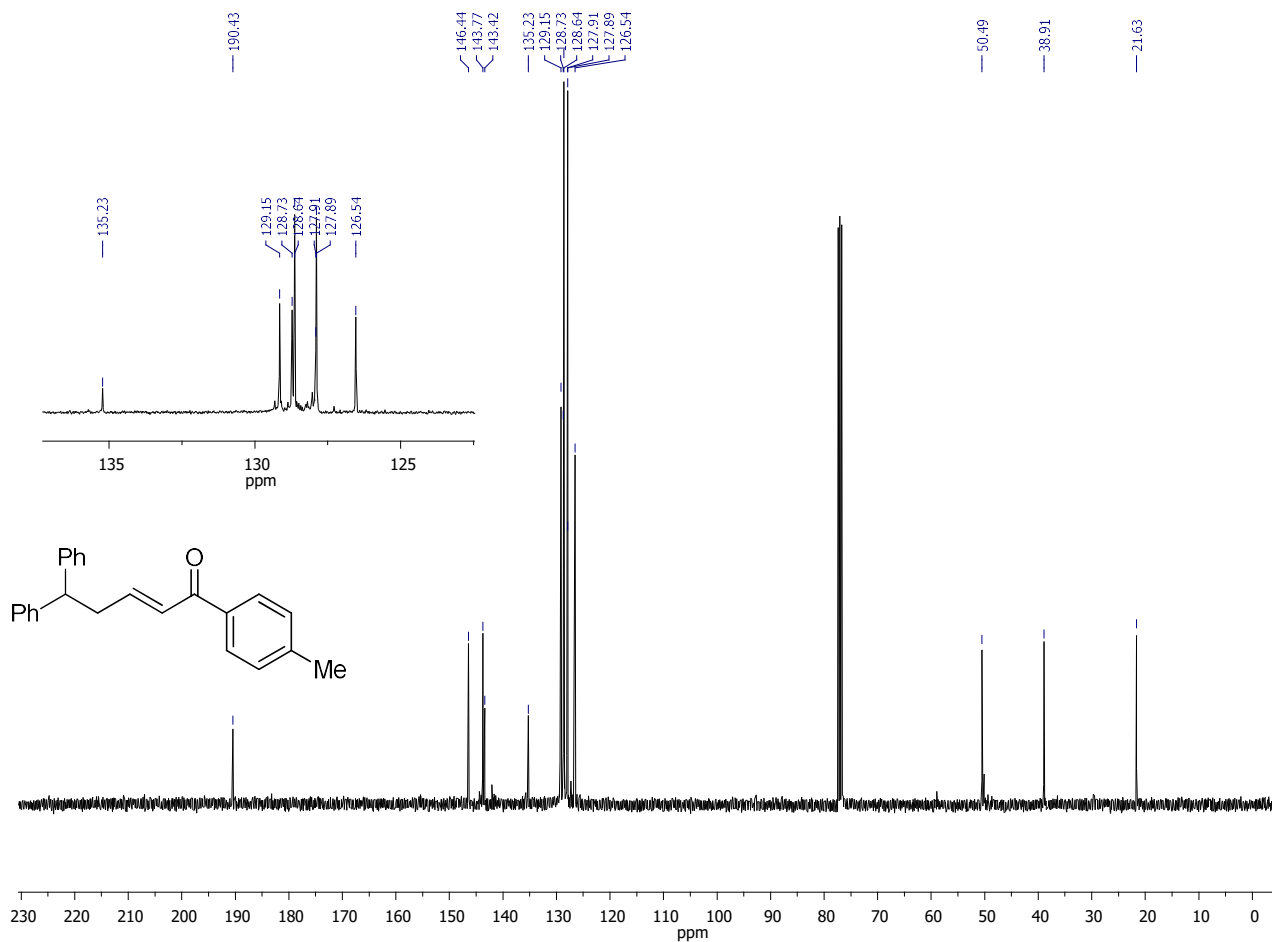

Fig. S20. <sup>13</sup>C NMR spectrum of the compound **2b** (CDCl<sub>3</sub>, 101 MHz).



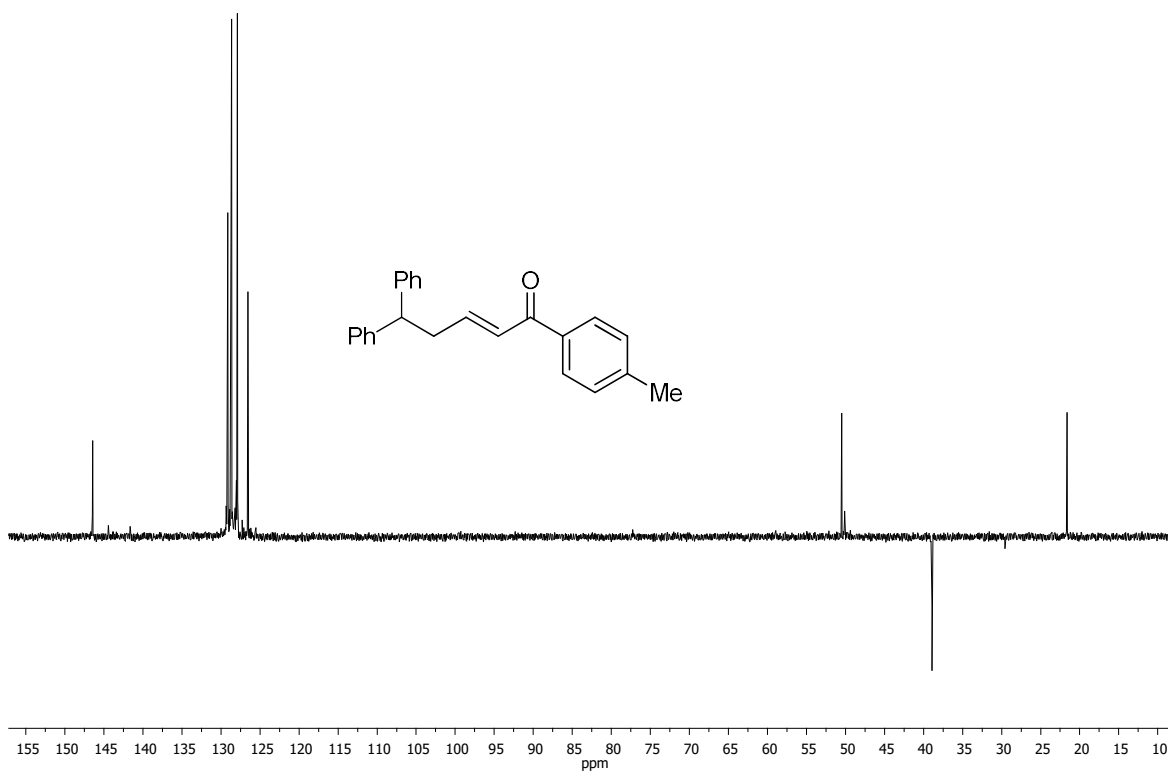

Fig. S21. DEPT spectrum of the compound **2b**.

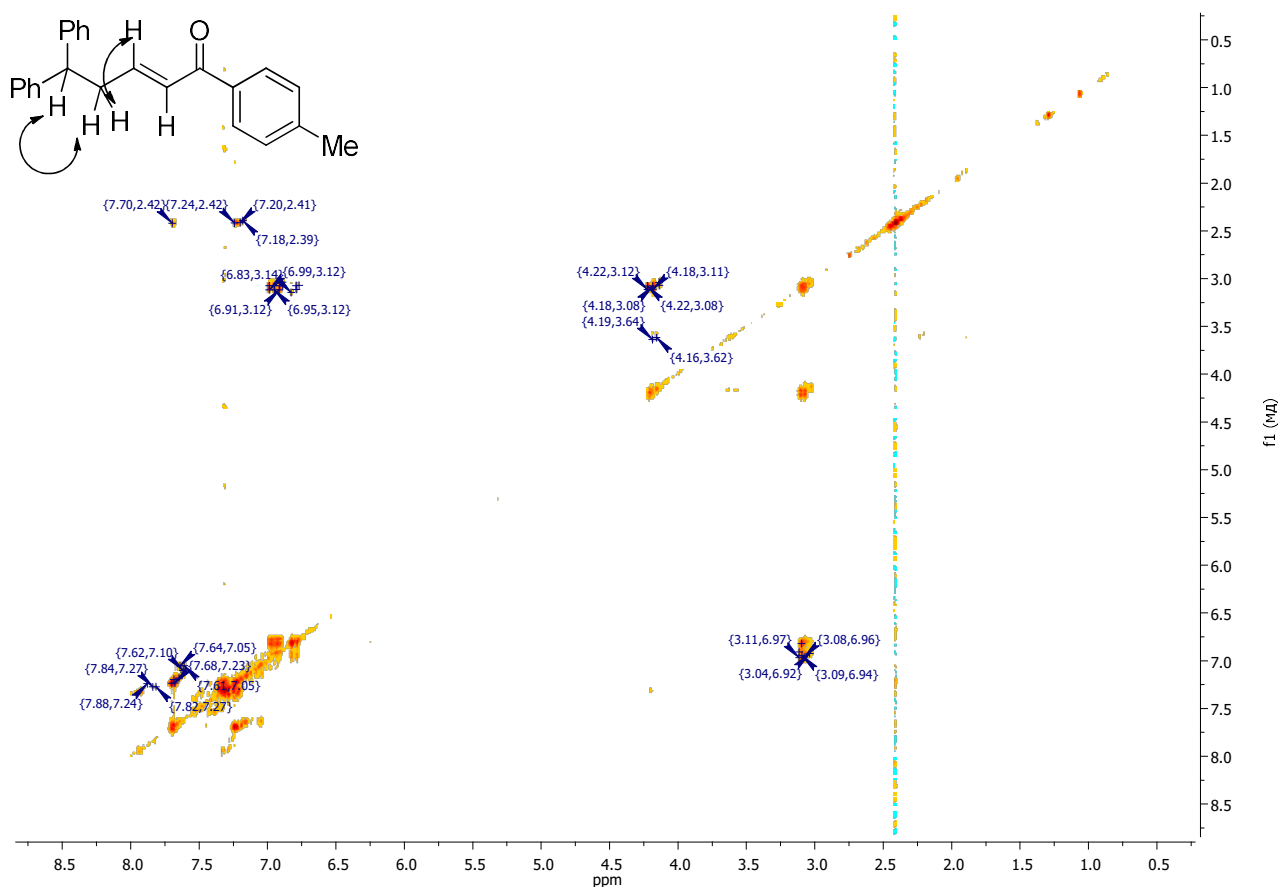

Fig. S22. H-H COSY spectrum of the compound **2b**.

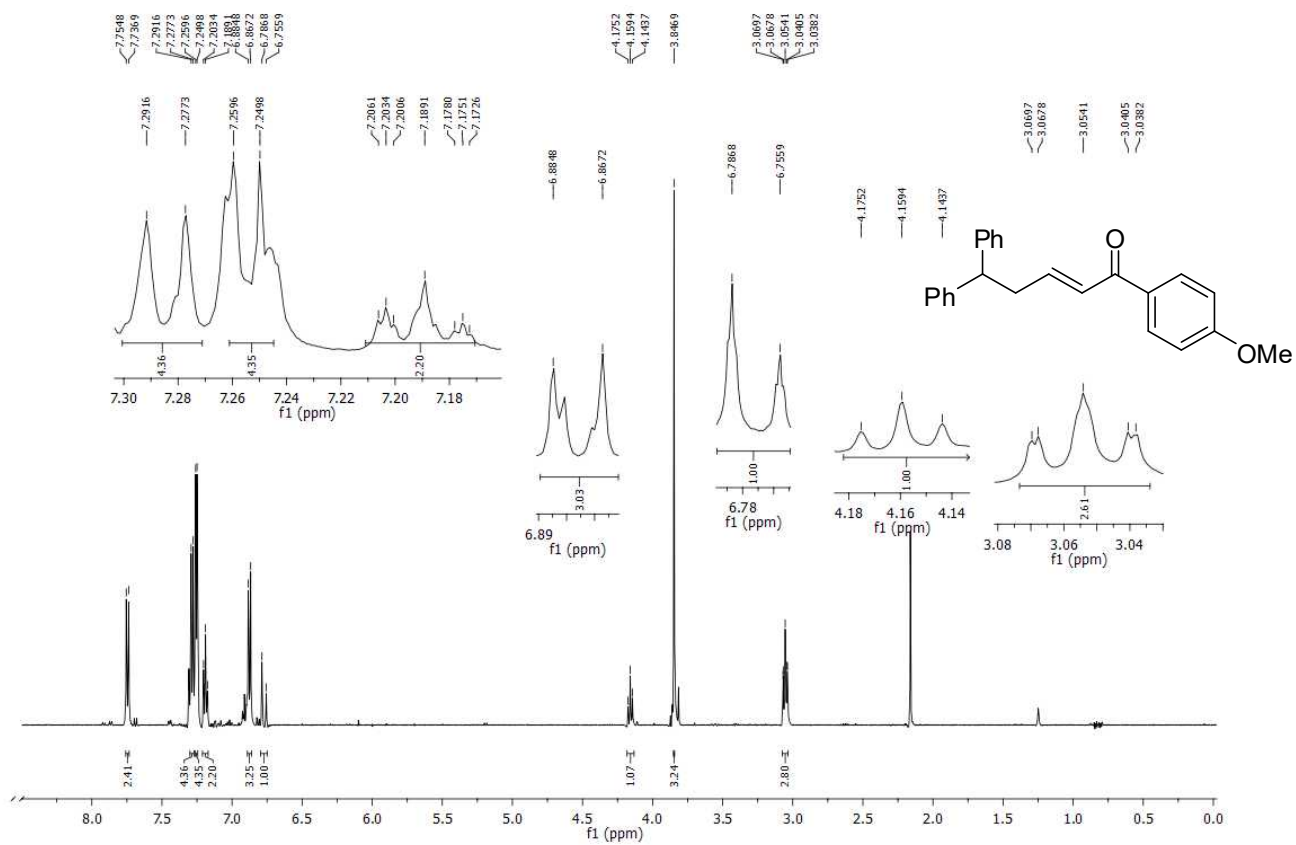

Fig. S23. <sup>1</sup>H NMR spectrum of the compound **2c** (CDCl<sub>3</sub>, 500 MHz).

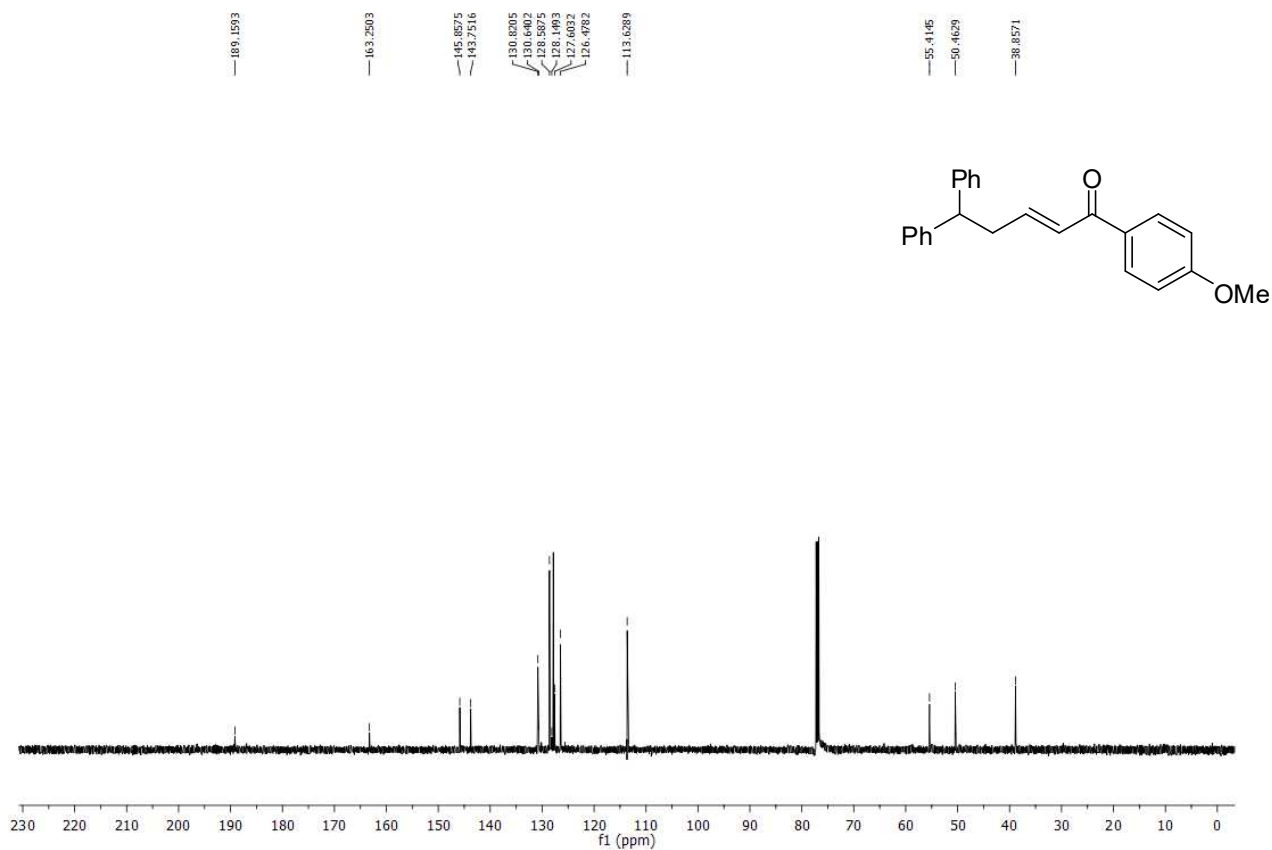

Fig. S24. <sup>13</sup>C NMR spectrum of the compound **2c** (CDCl<sub>3</sub>, 125 MHz).

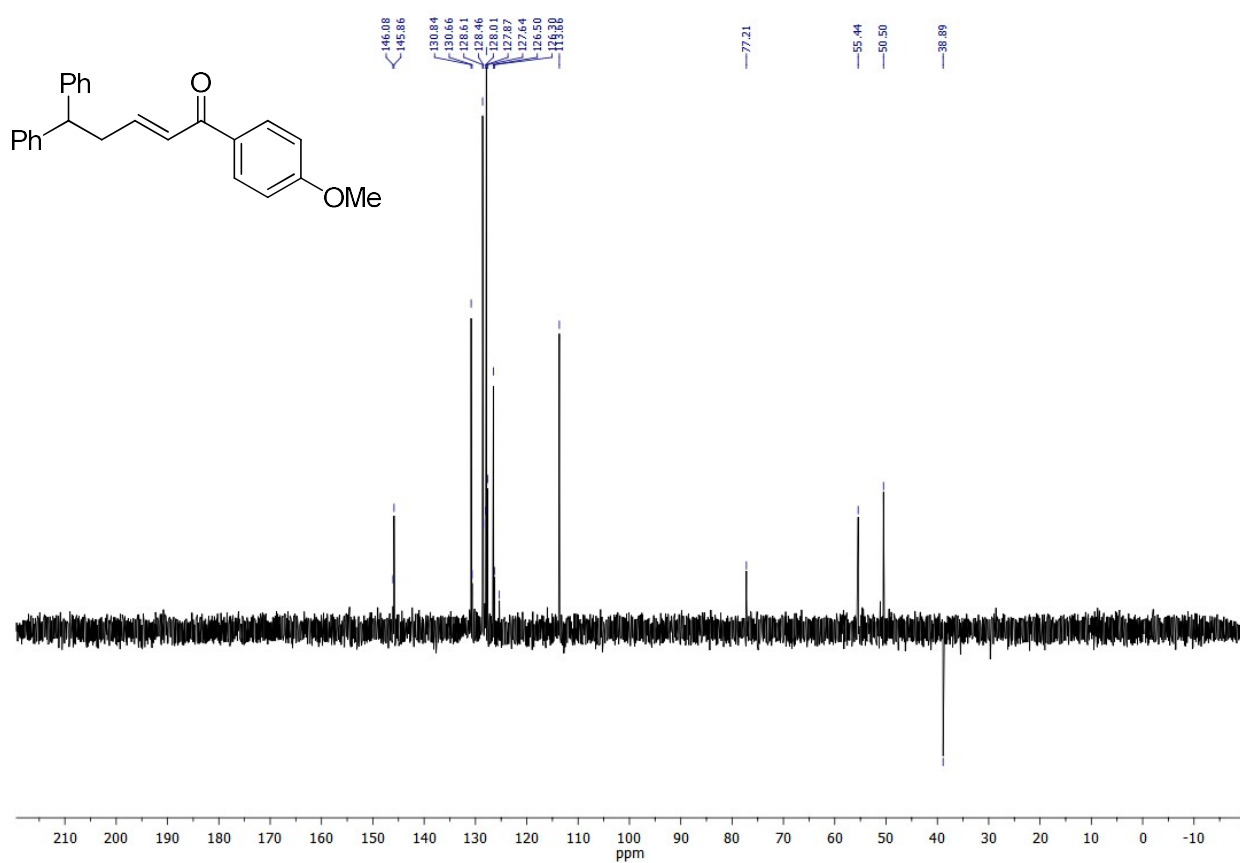

Fig. S25. DEPT spectrum of the compound 2c.

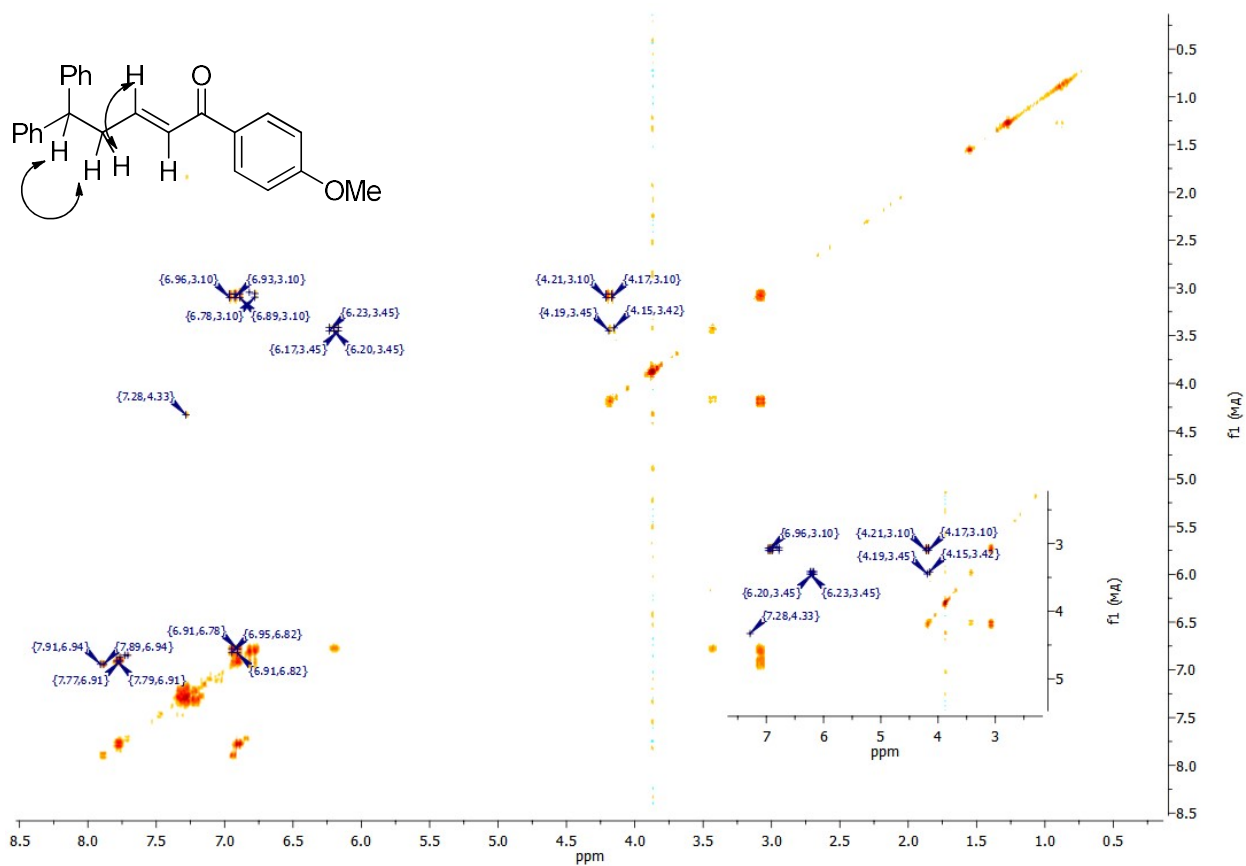

Fig. S26. H-H COSY spectrum of the compound 2c.

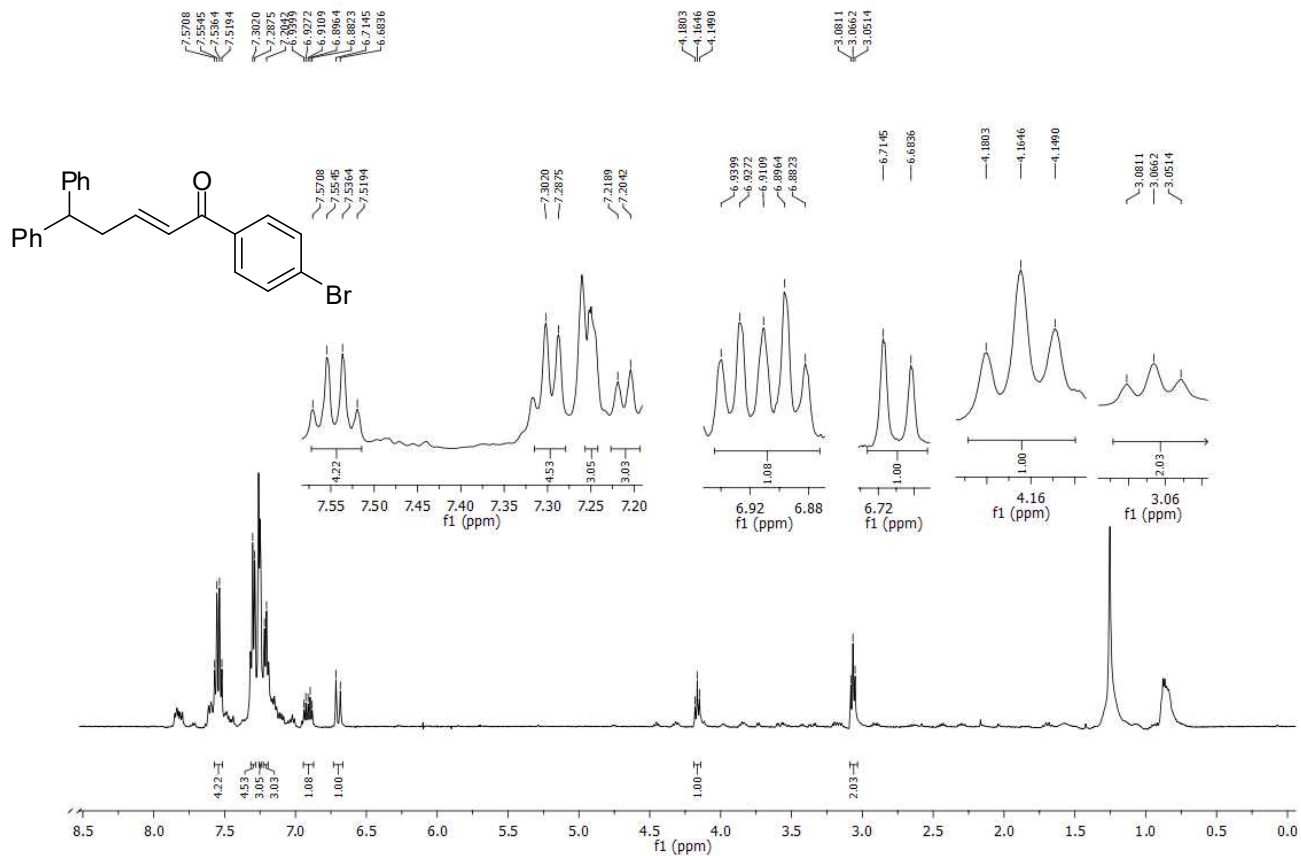

Fig. S27. <sup>1</sup>H NMR spectrum of the compound **2d** (CDCl<sub>3</sub>, 500 MHz).

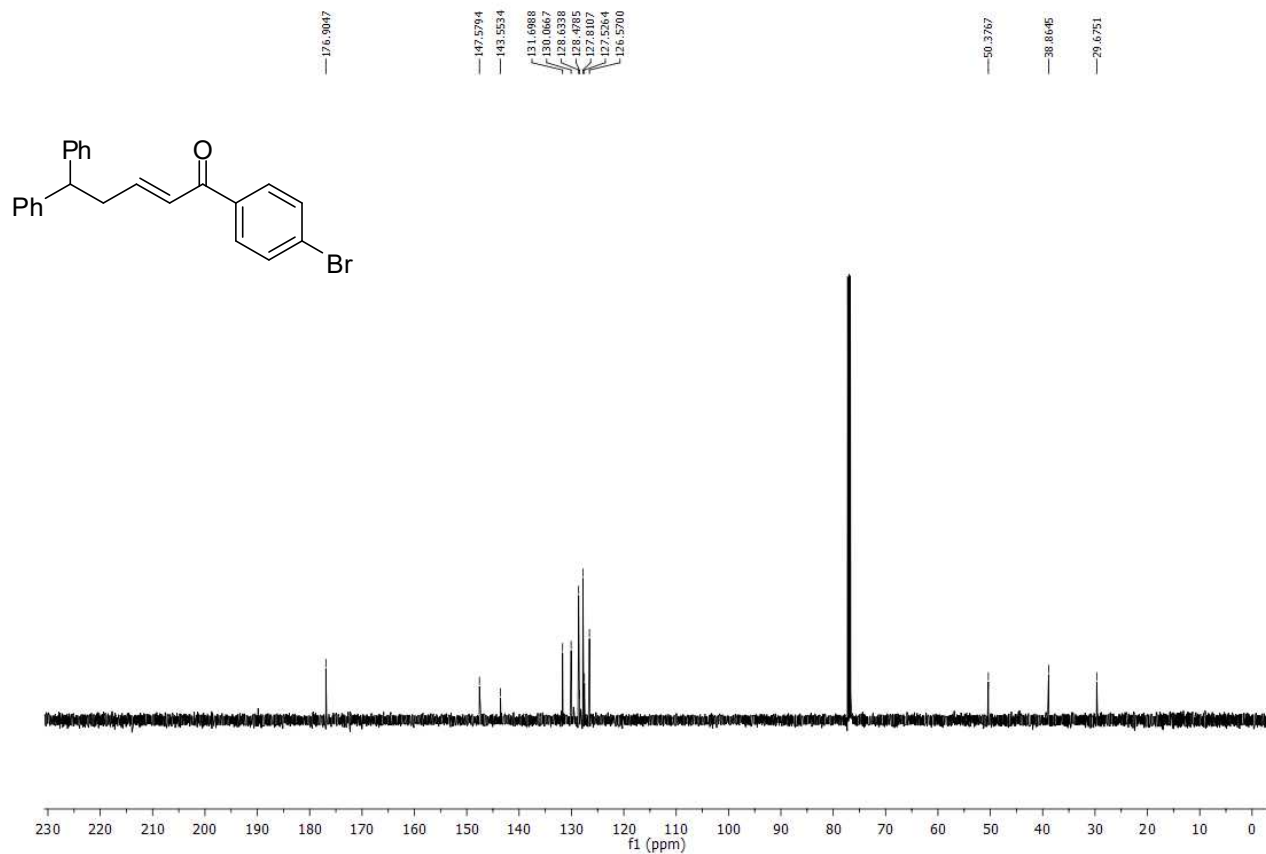

Fig. S28. <sup>13</sup>C NMR spectrum of the compound **2d** (CDCl<sub>3</sub>, 125 MHz).

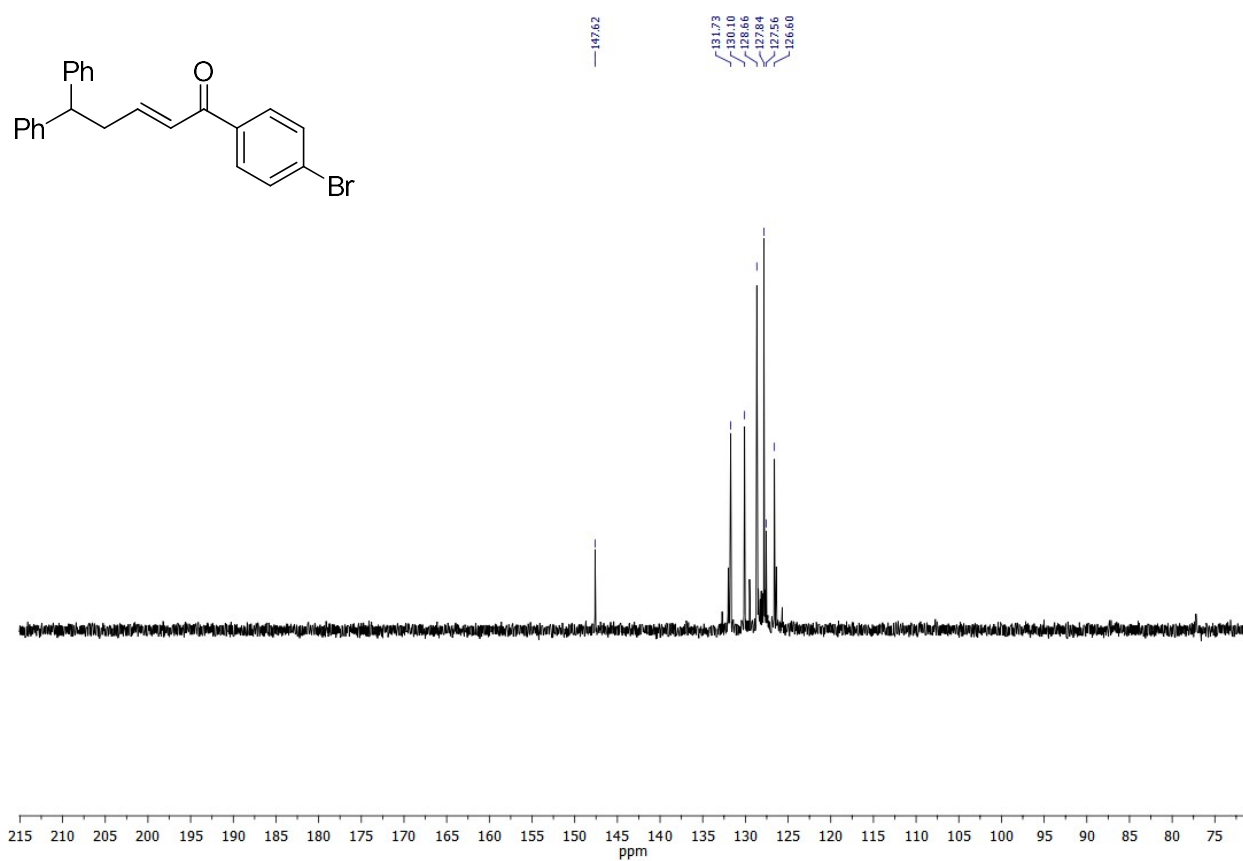

Fig. S29. DEPT spectrum of the compound **2d**.

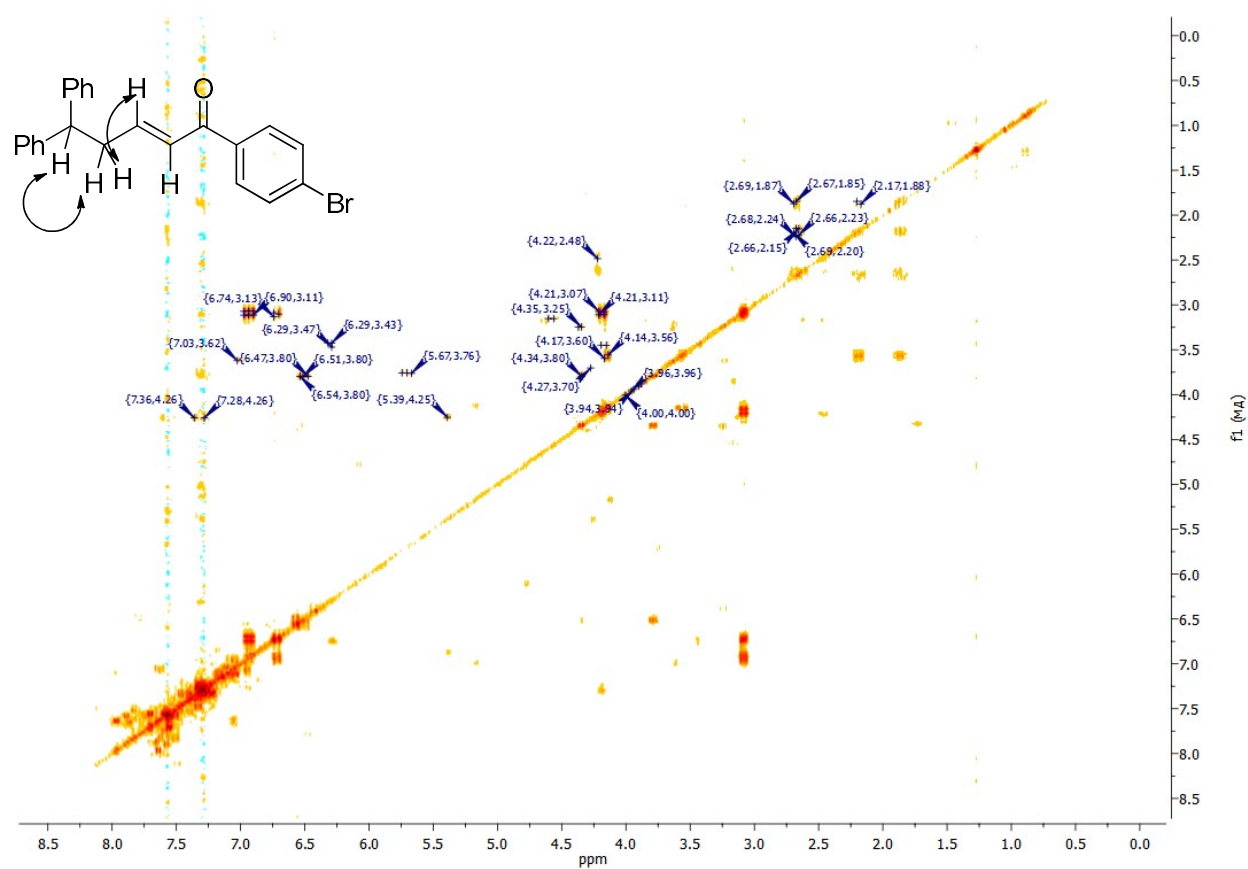

Fig. S30. H-H COSY spectrum of the compound **2d**.

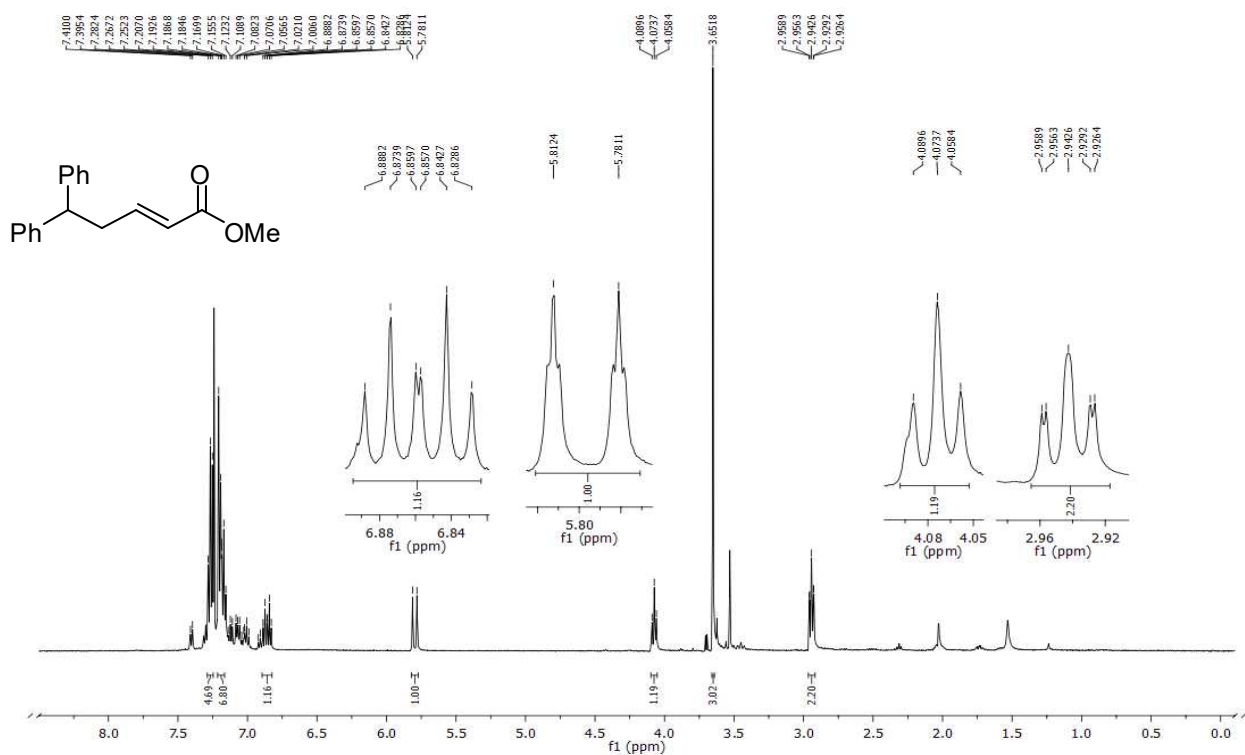

Fig. S31. <sup>1</sup>H NMR spectrum of the compound **2f** (CDCl<sub>3</sub>, 500 MHz).

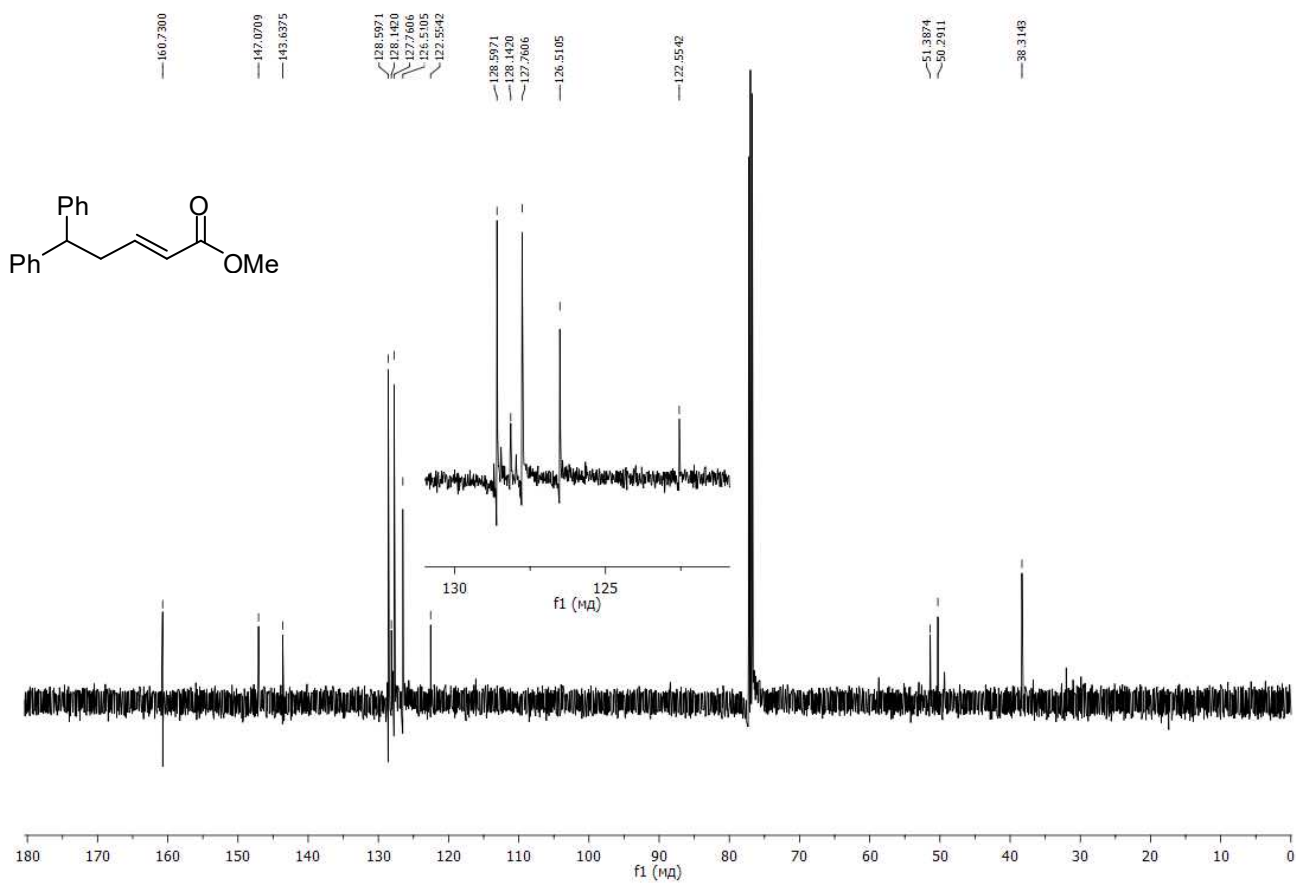

Fig. S32. <sup>13</sup>C NMR spectrum of the compound **2f** (CDCl<sub>3</sub>, 125 MHz).

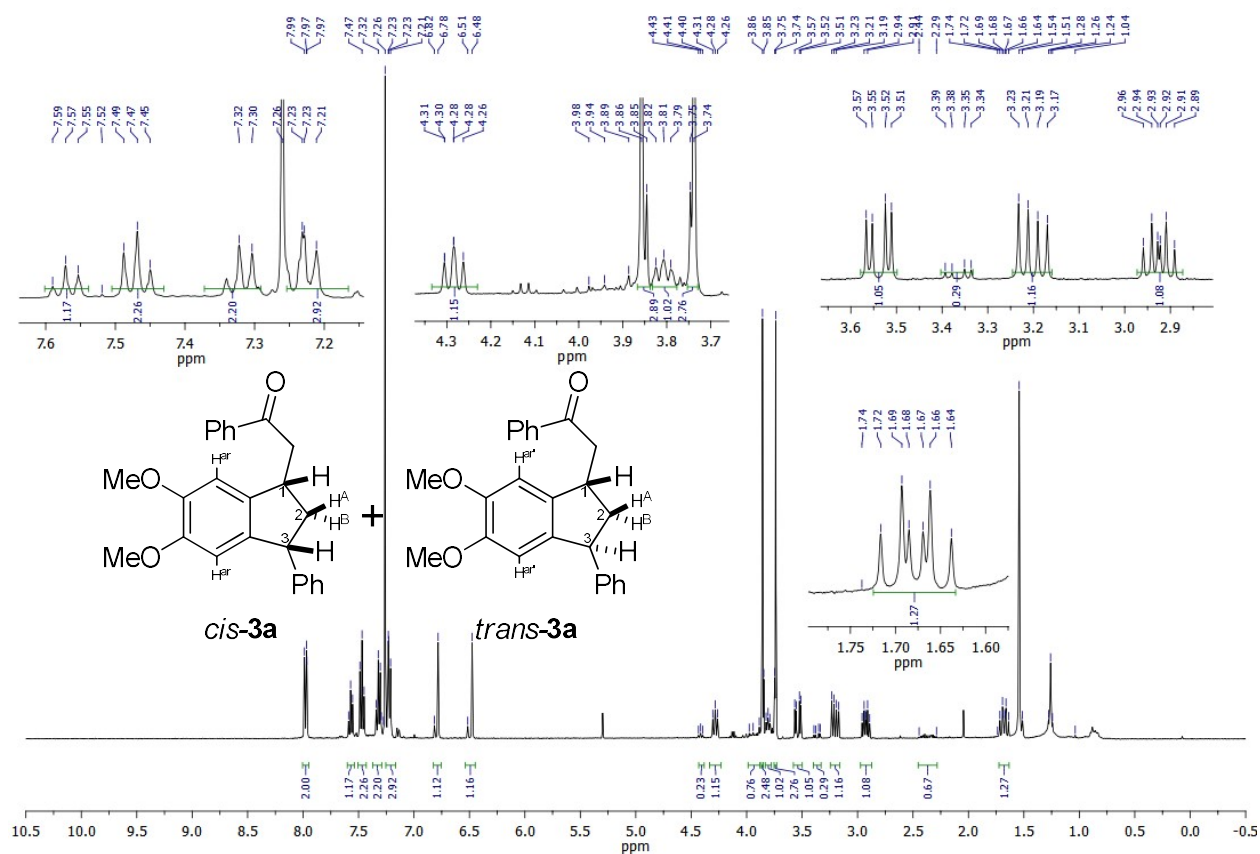

Fig. S33.  $^1\text{H}$  NMR spectrum of mixture of compounds *cis-3a* and *trans-3a* ( $\text{CDCl}_3$ , 400 MHz).

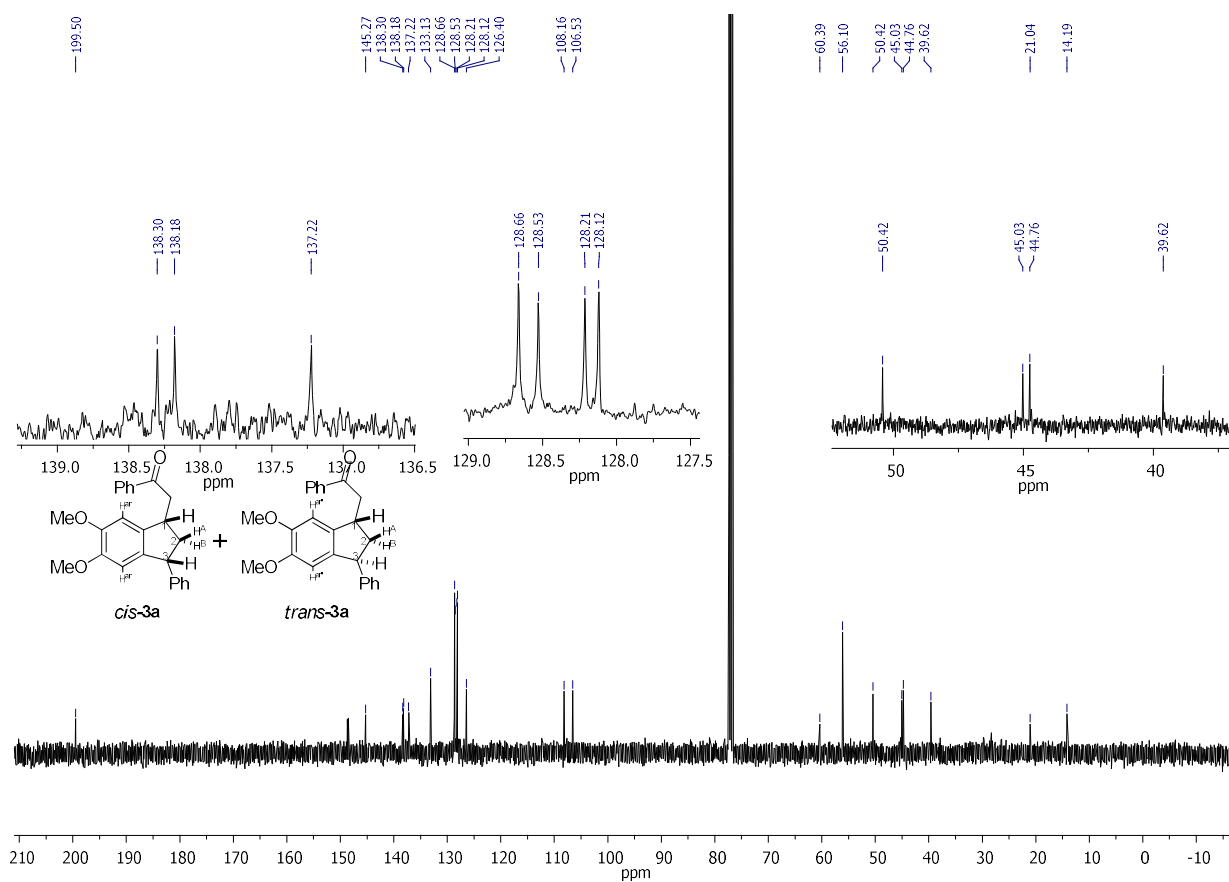

Fig. S34.  $^{13}\text{C}$  NMR spectrum of mixture of compounds *cis-3a* and *trans-3a* ( $\text{CDCl}_3$ , 101 MHz).

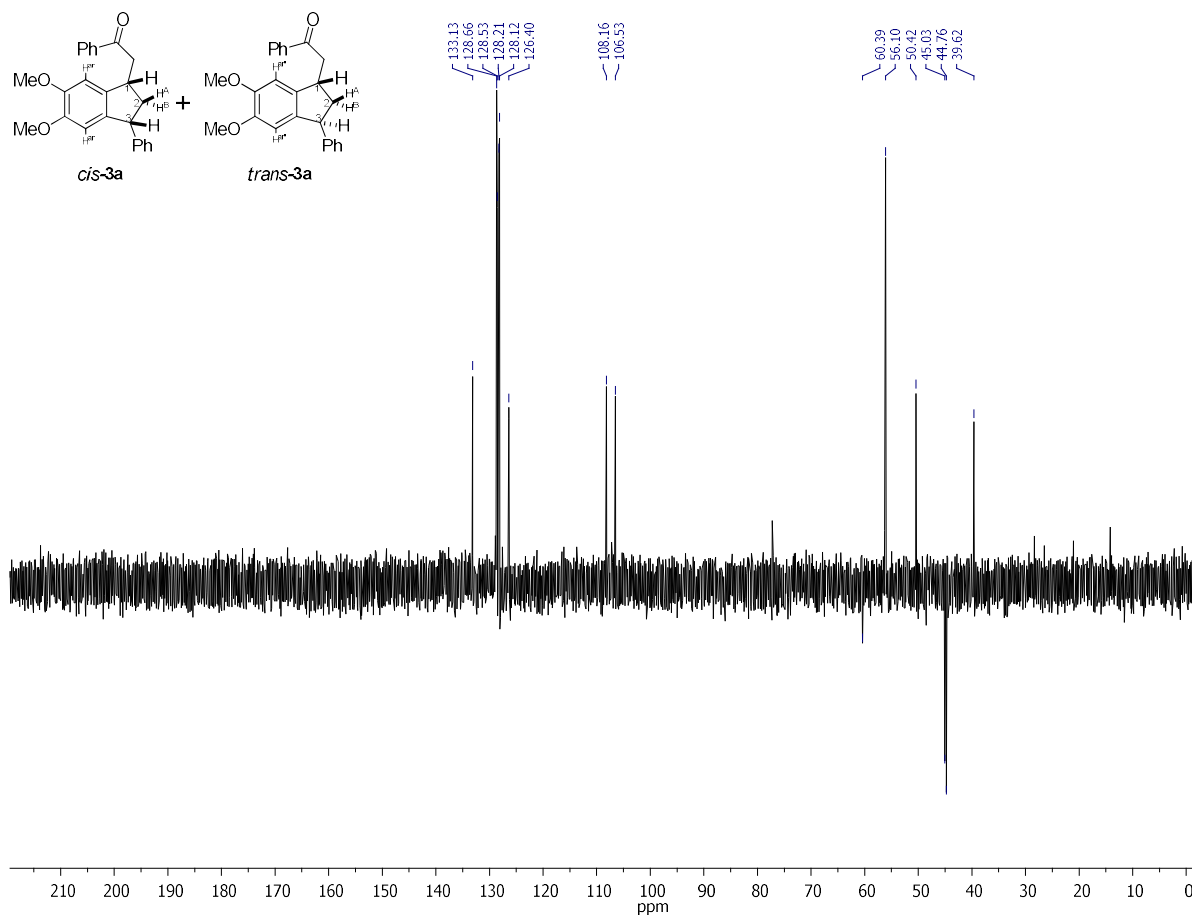

Fig. S35. DEPT of mixture of compounds *cis-3a* and *trans-3a*.

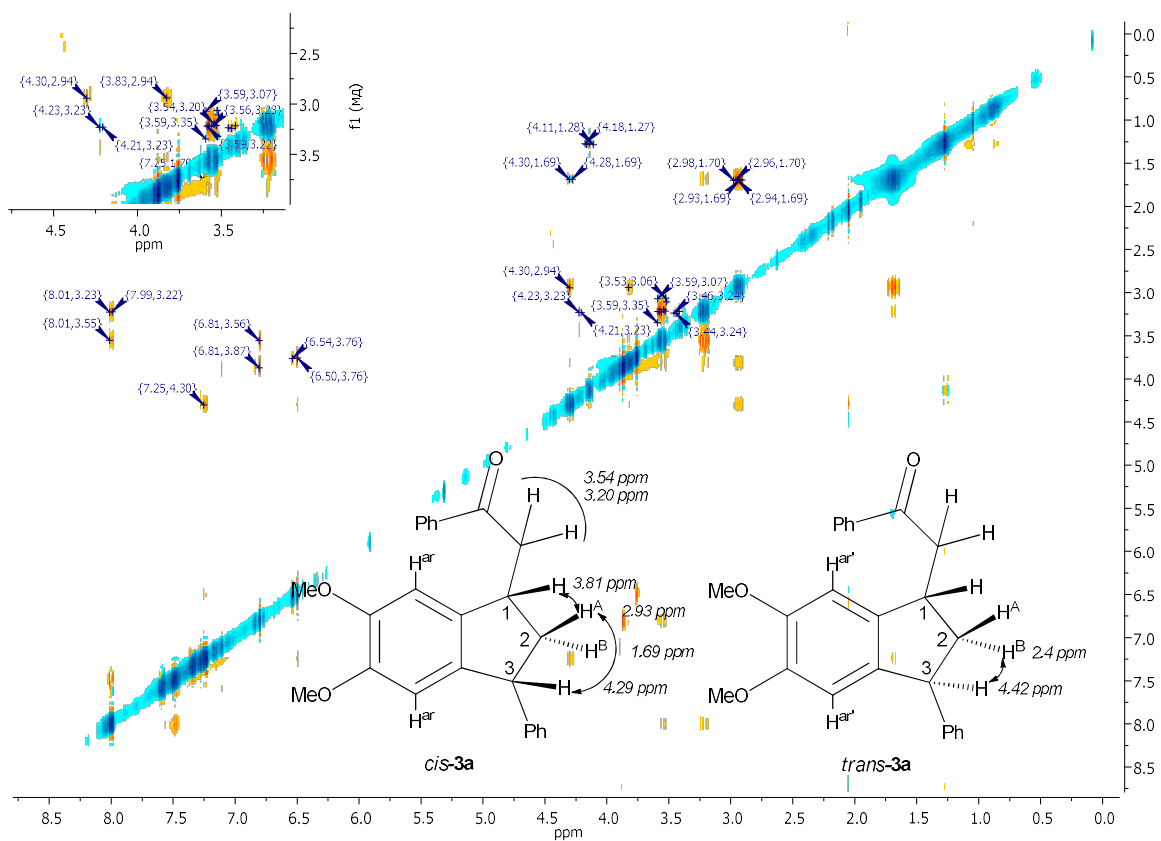

Fig. S36. NOESY spectrum of mixture of compounds *cis-3a* and *trans-3a*.





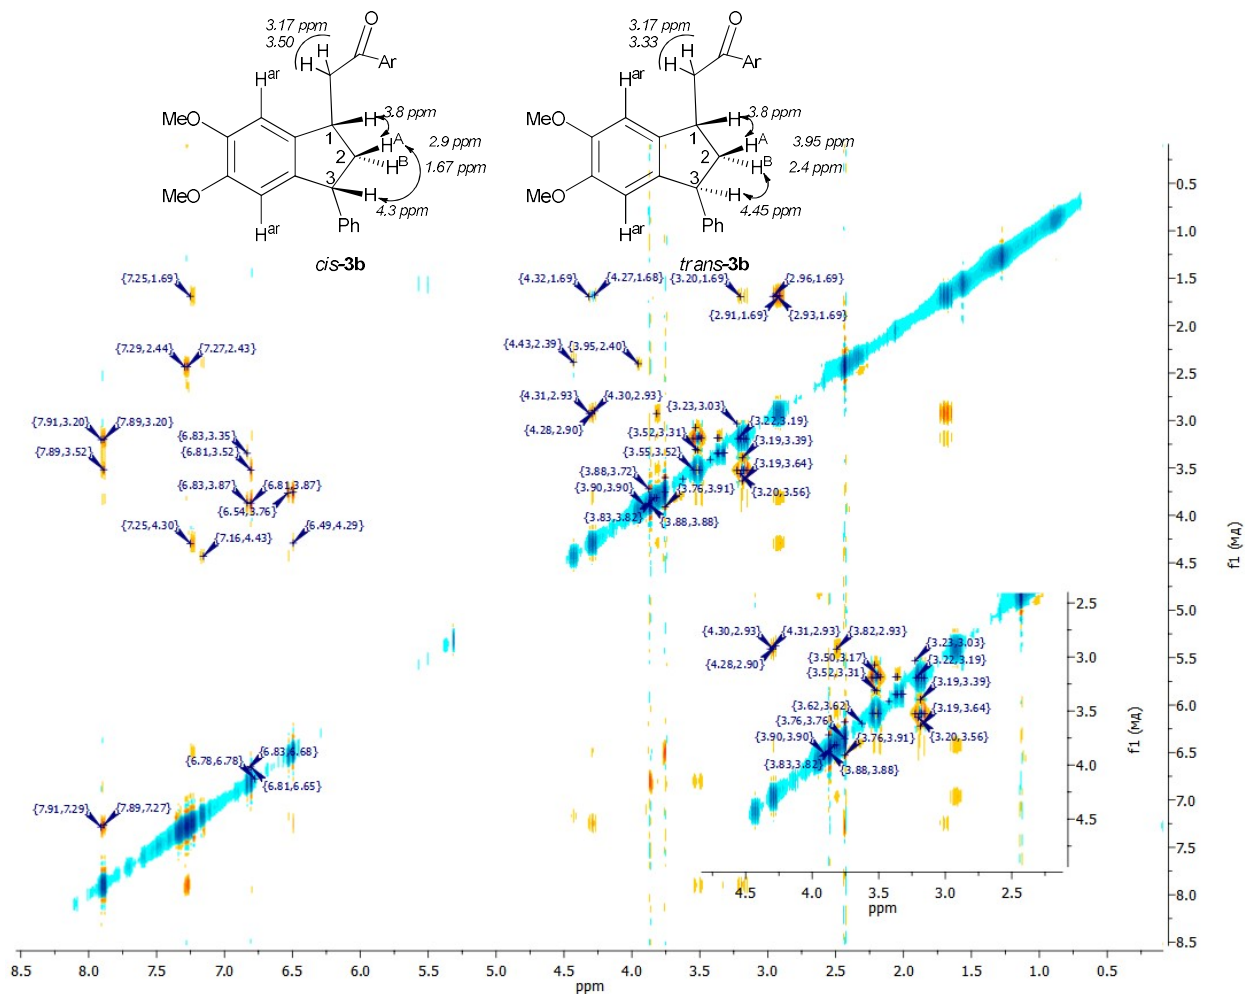

Fig. S39. NOESY spectrum of mixture of compounds *cis-3b* and *trans-3b*.

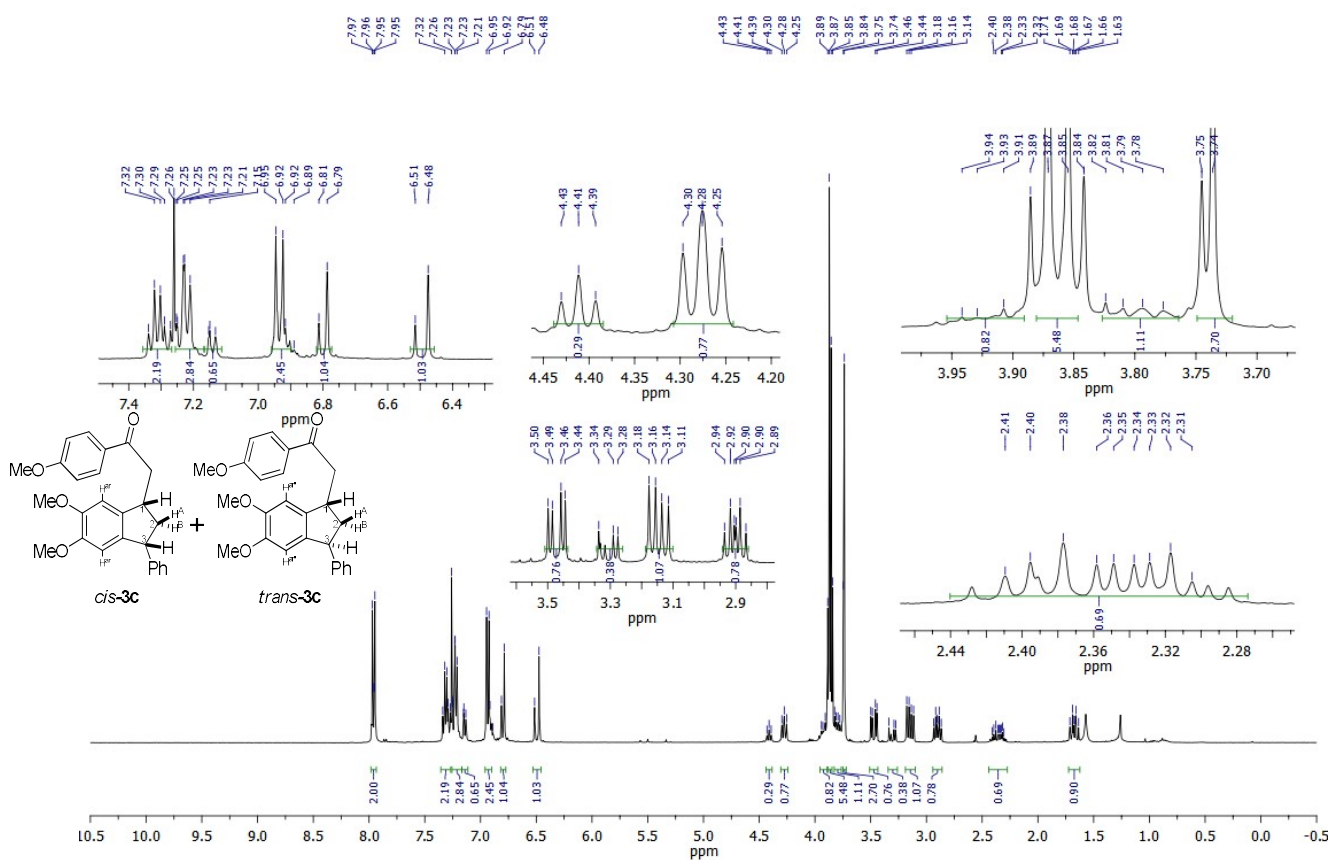

Fig. S40.  $^1\text{H}$  NMR spectrum of mixture of compounds *cis-3c* and *trans-3c* ( $\text{CDCl}_3$ , 400 MHz).

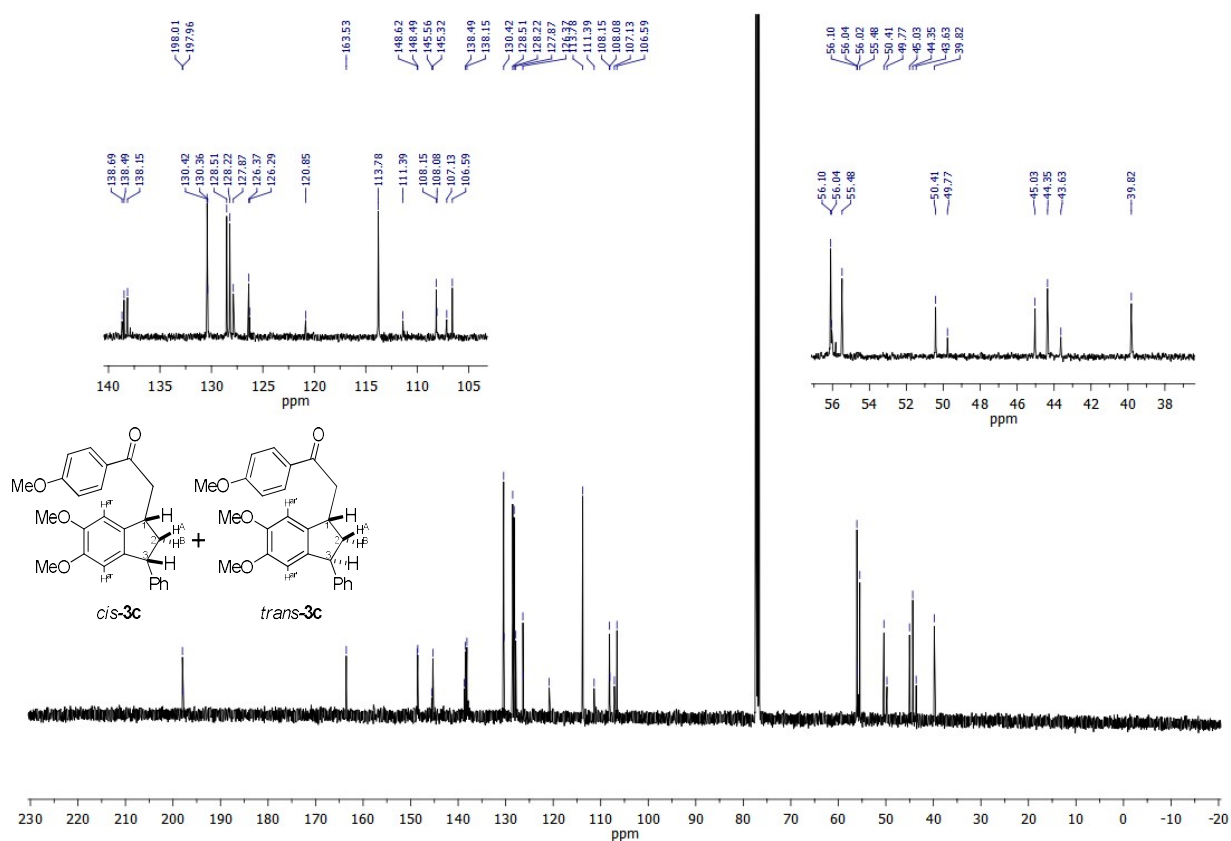

Fig. S41. <sup>13</sup>C NMR spectrum of mixture of compounds *cis-3c* and *trans-3c* (CDCl<sub>3</sub>, 101 MHz).

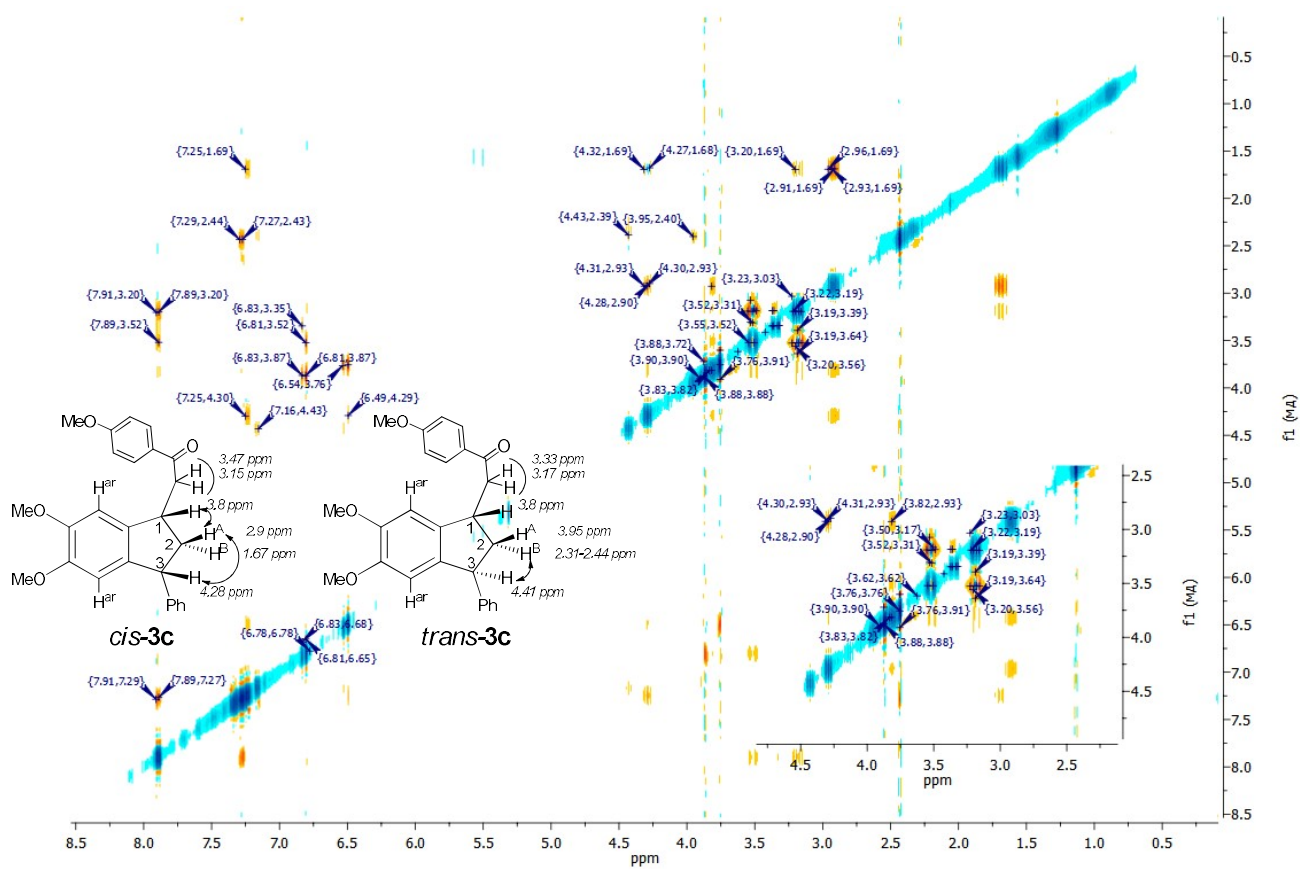

Fig. S42. NOESY spectrum of mixture of compounds *cis-3c* and *trans-3c*.

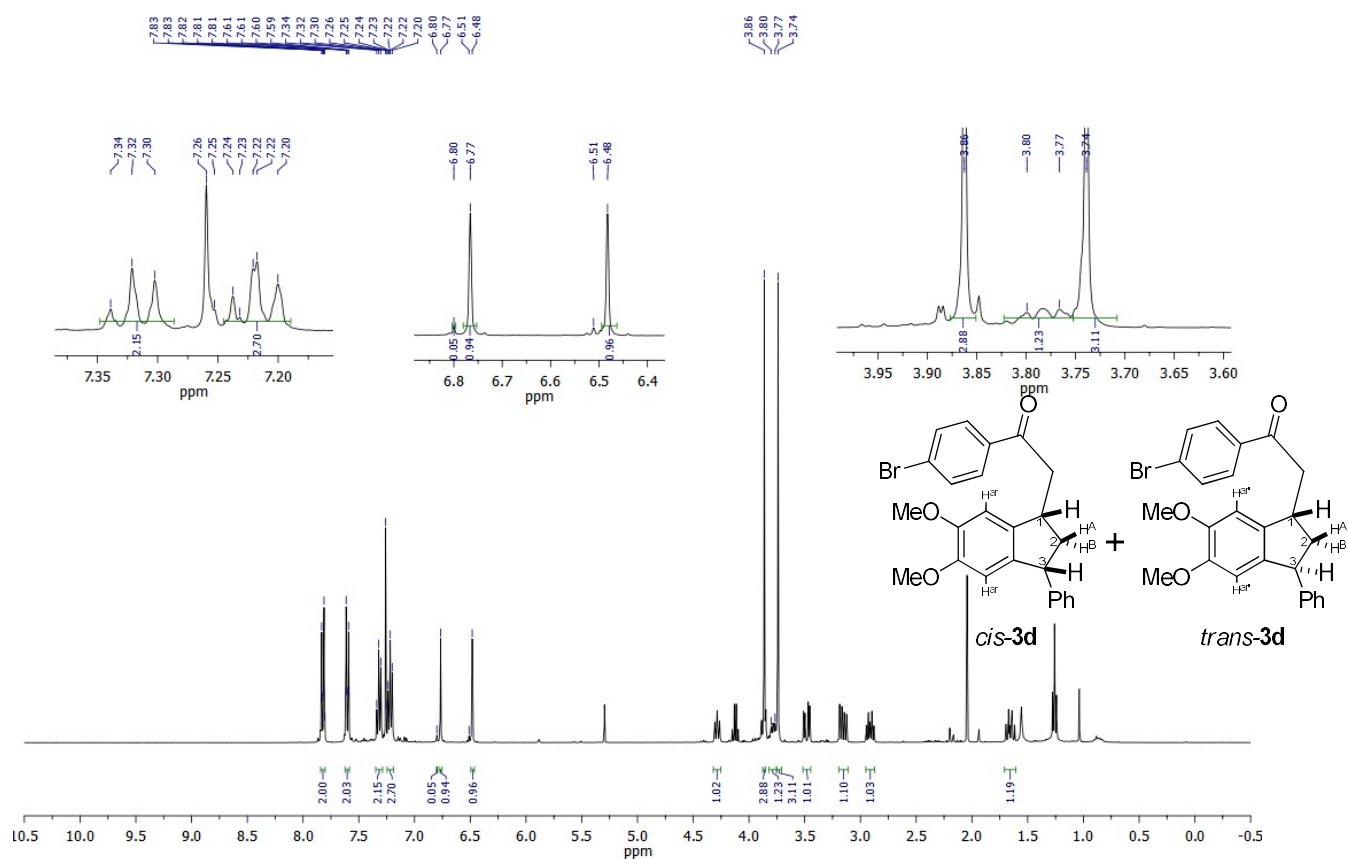

Fig. S43.  $^1\text{H}$  NMR spectrum of mixture of compounds *cis*-**3d** and *trans*-**3d** ( $\text{CDCl}_3$ , 400 MHz).

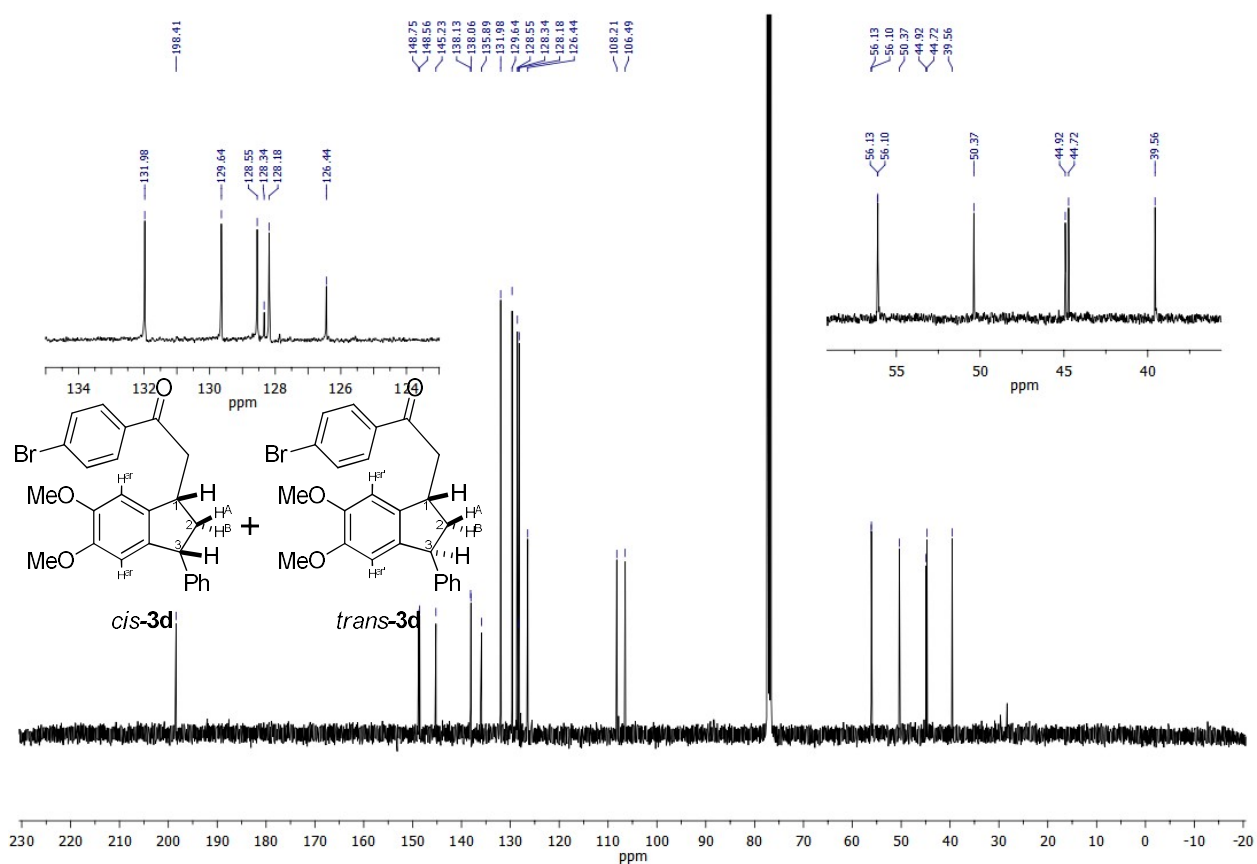

Fig. S44.  $^{13}\text{C}$  NMR spectrum of mixture of compounds *cis*-**3d** and *trans*-**3d** ( $\text{CDCl}_3$ , 101 MHz).

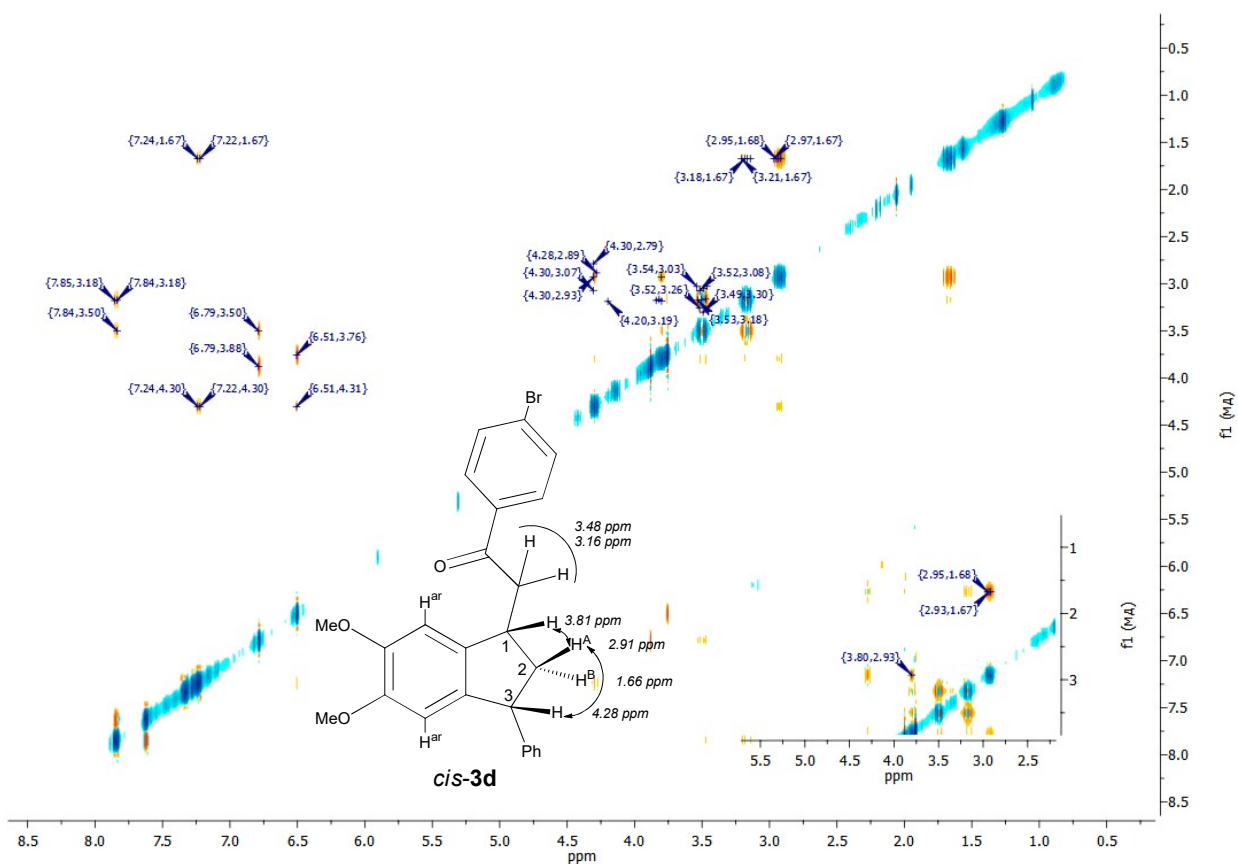

Fig. S45. NOESY spectrum of mixture of compounds *cis-3d* and *trans-3d*.

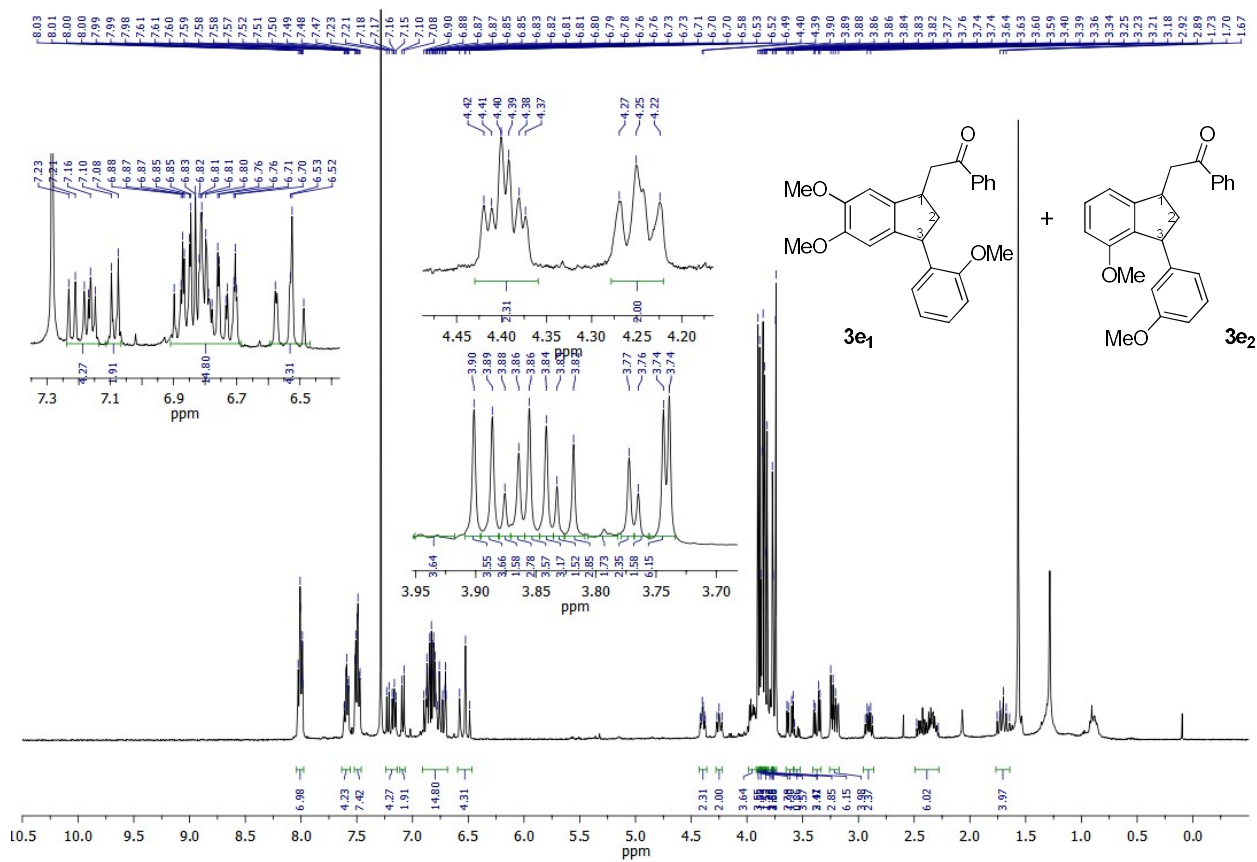

Fig. S46. <sup>1</sup>H NMR spectrum of mixture of compounds **3e<sub>1</sub>** and **3e<sub>2</sub>** (CDCl<sub>3</sub>, 400 MHz).

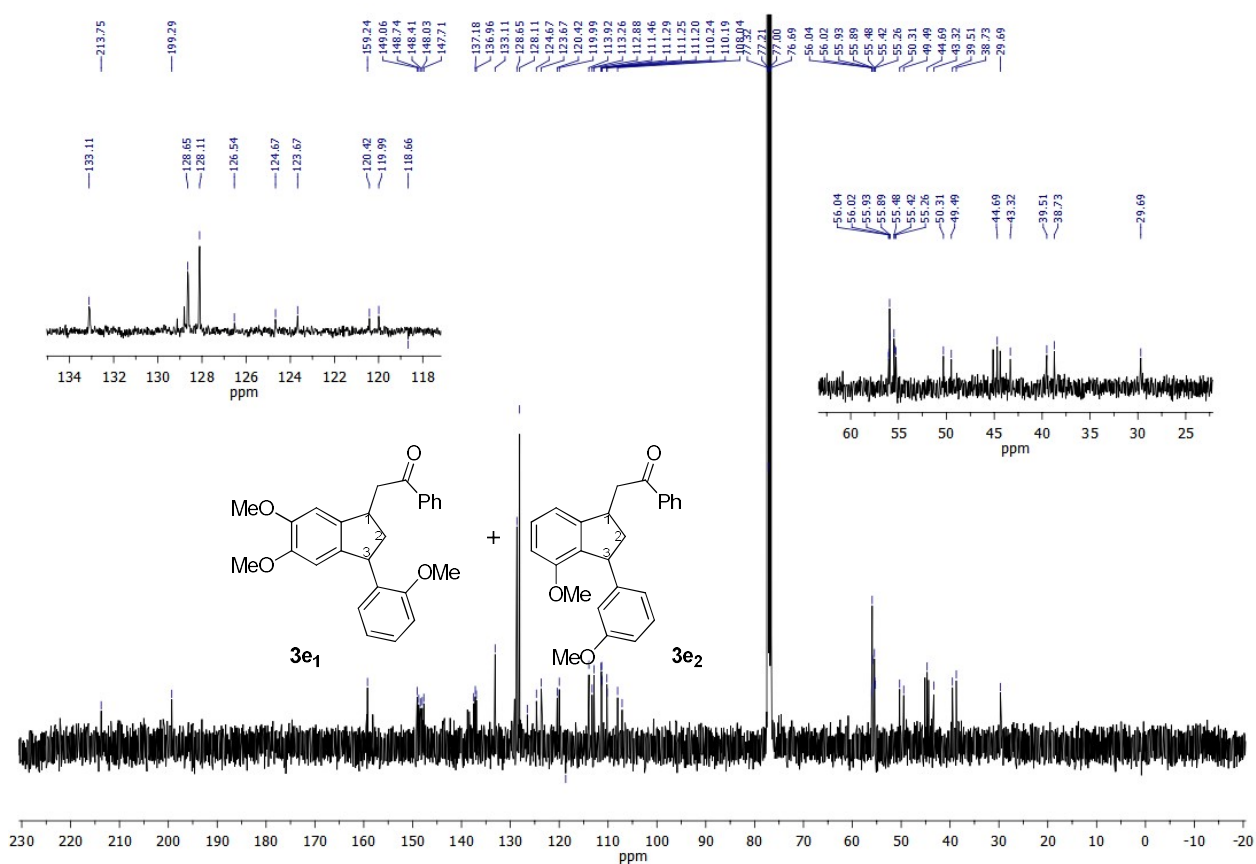

Fig. S47. <sup>13</sup>C NMR spectrum of mixture of compounds **3e<sub>1</sub>** and **3e<sub>2</sub>** (CDCl<sub>3</sub>, 101 MHz).

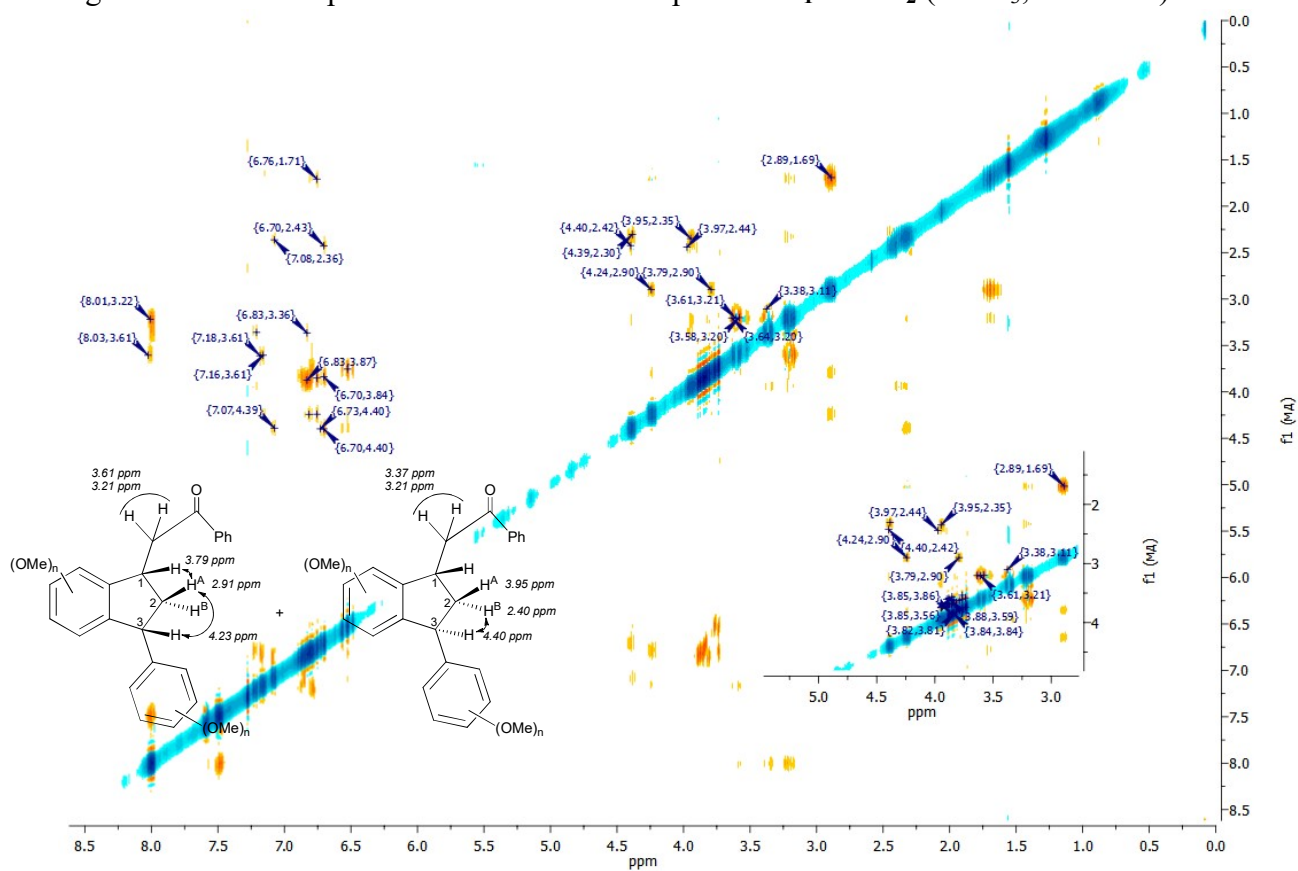

Fig. S48. NOESY spectrum of mixture of compounds **3e<sub>1</sub>** and **3e<sub>2</sub>**.

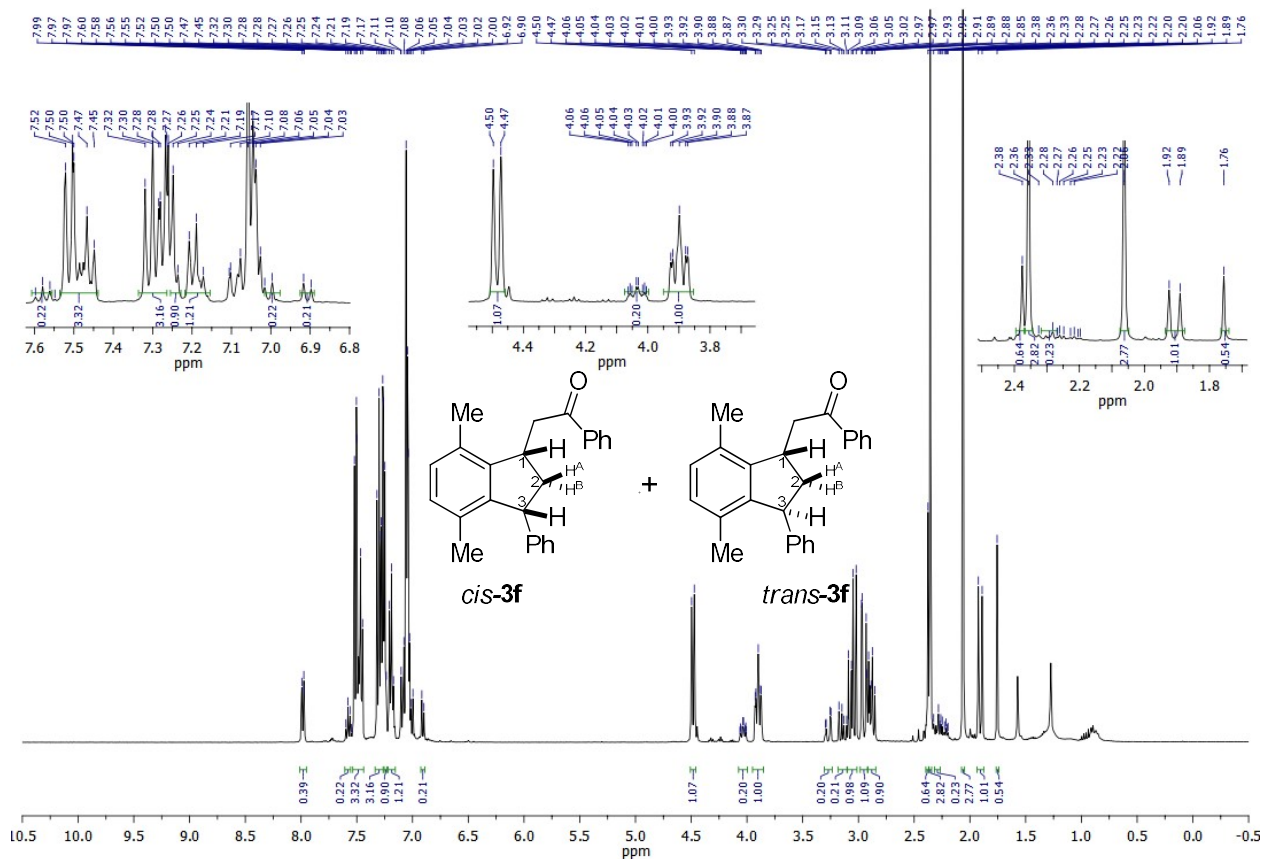

Fig. S49. <sup>1</sup>H NMR spectrum of mixture of compounds *cis-3f* and *trans-3f* (CDCl<sub>3</sub>, 400 MHz).

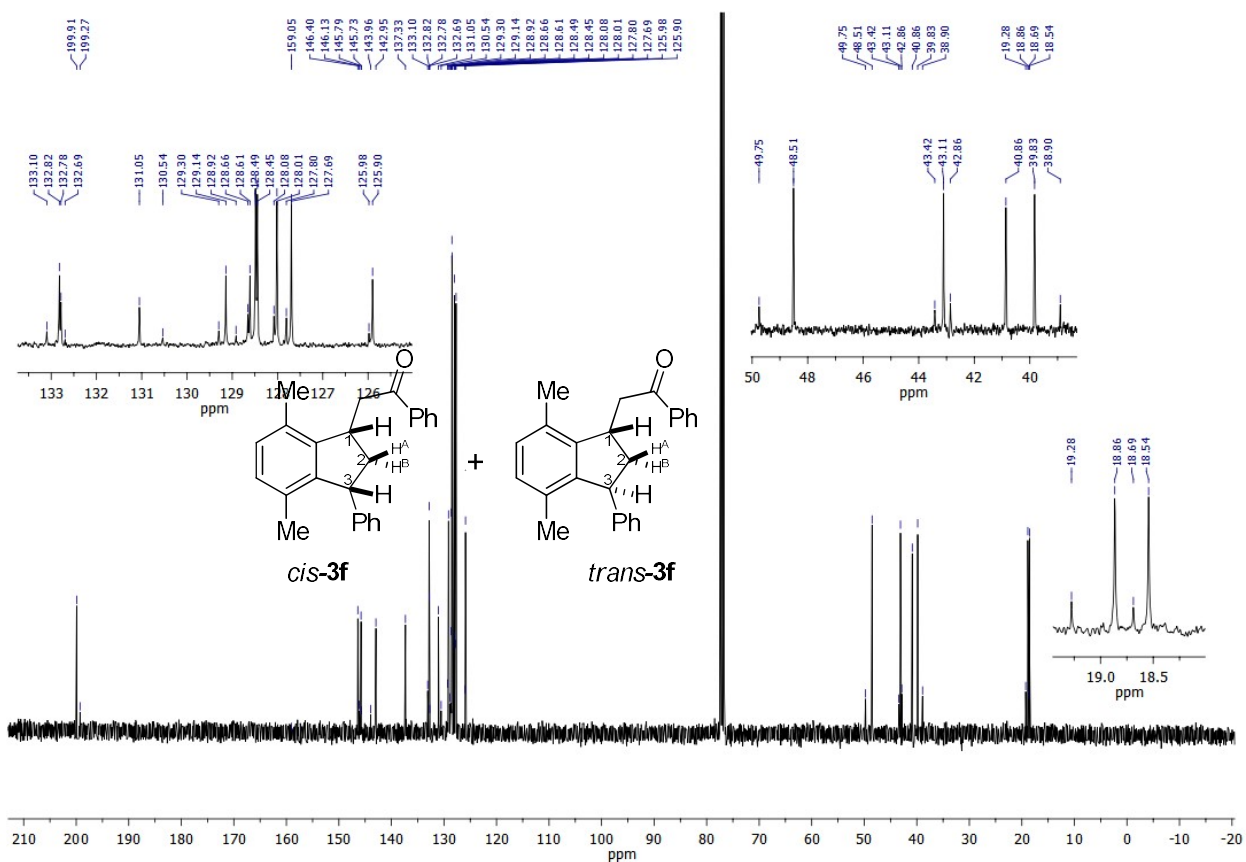

Fig. S50. <sup>13</sup>C NMR spectrum of mixture of compounds *cis-3f* and *trans-3f* (CDCl<sub>3</sub>, 101 MHz).

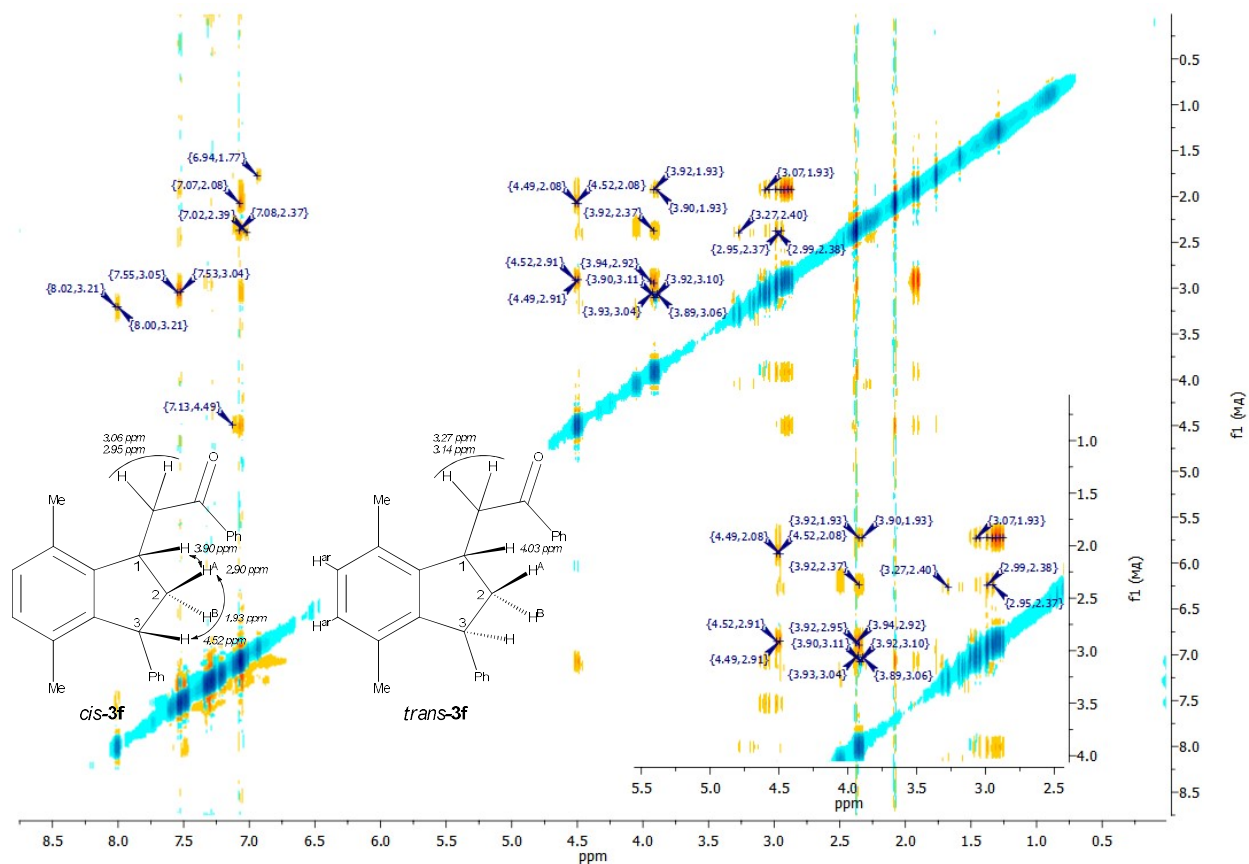

Fig. S51. NOESY spectrum of mixture of compounds *cis-3f* and *trans-3f*.

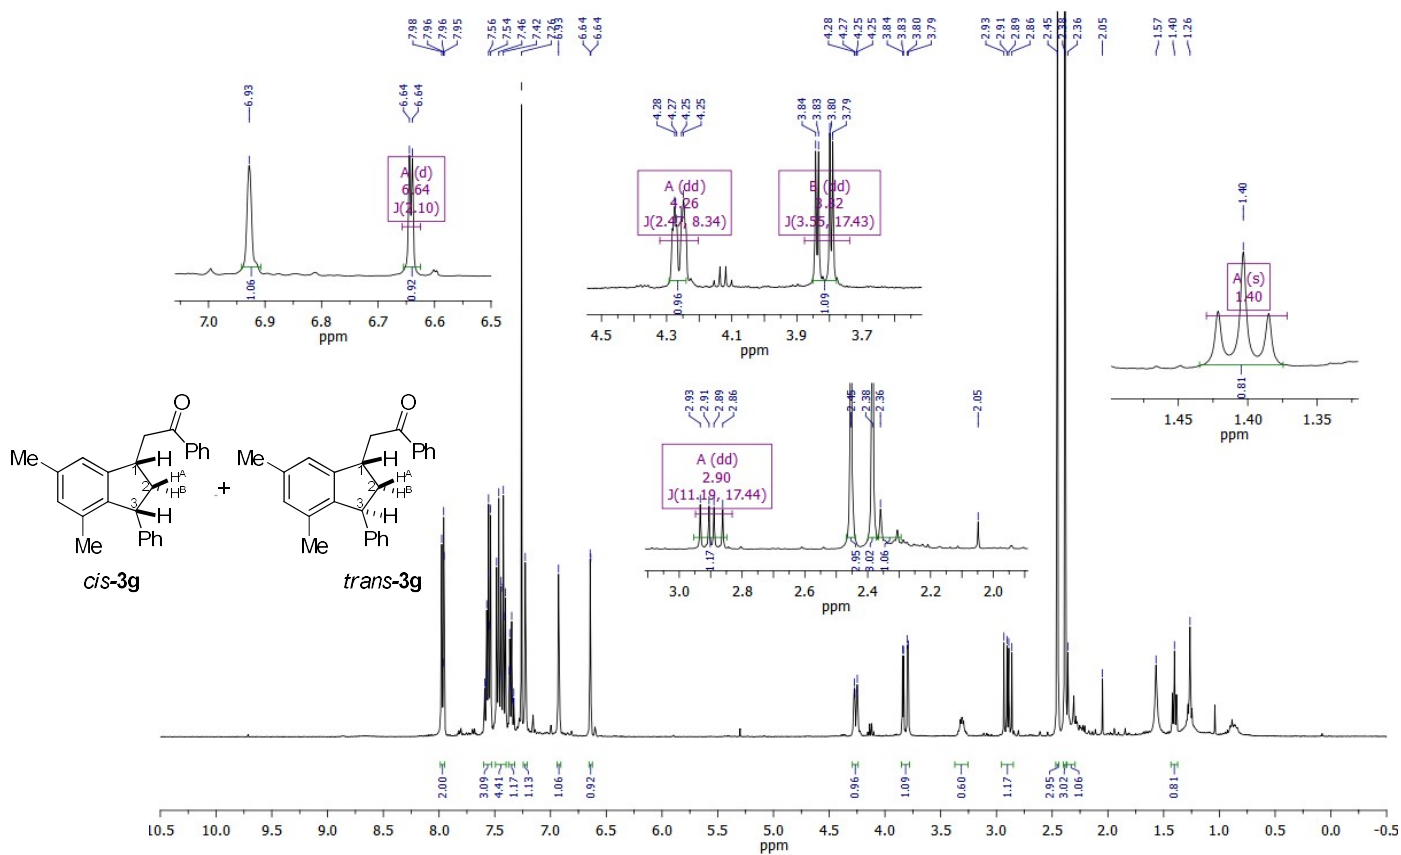

Fig. S52. <sup>1</sup>H NMR spectrum of mixture of compounds *cis-3g* and *trans-3g* (CDCl<sub>3</sub>, 400 MHz).



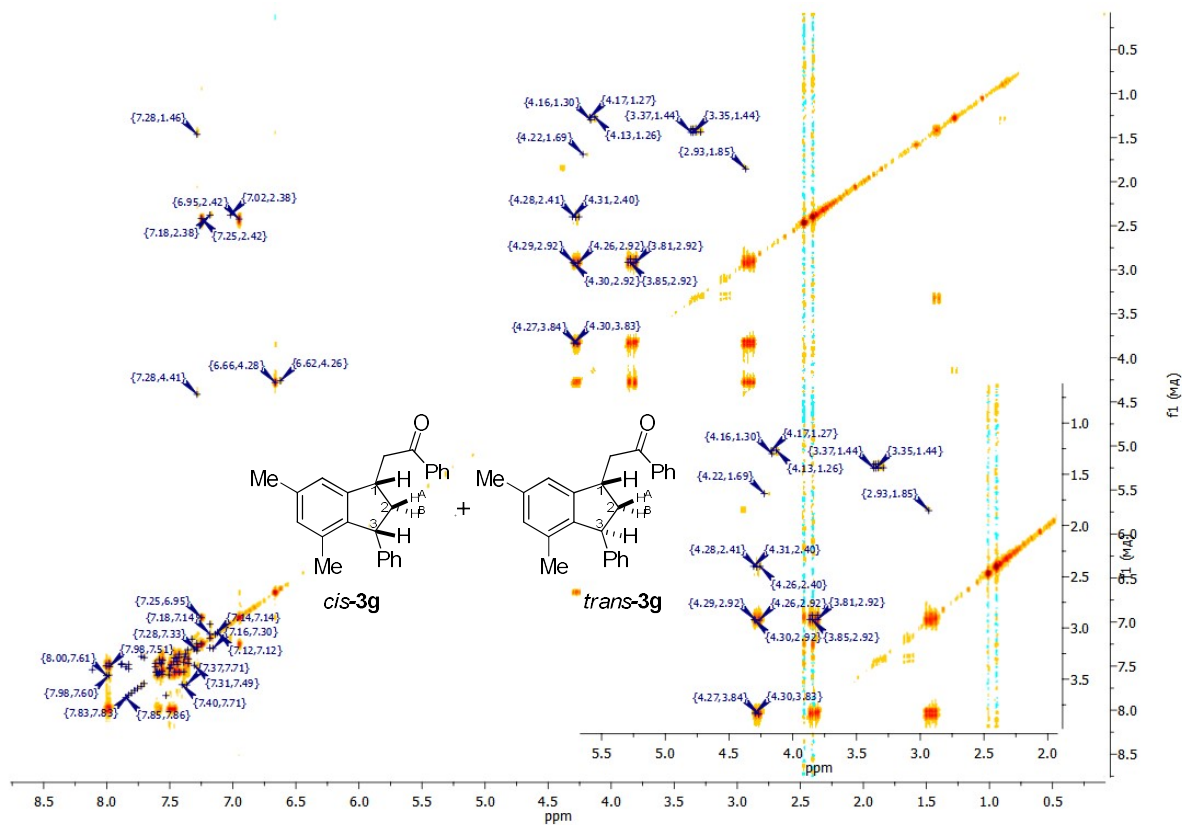

Fig. S53. COSY H-H spectrum of mixture of compounds *cis*-3g and *trans*-3g.

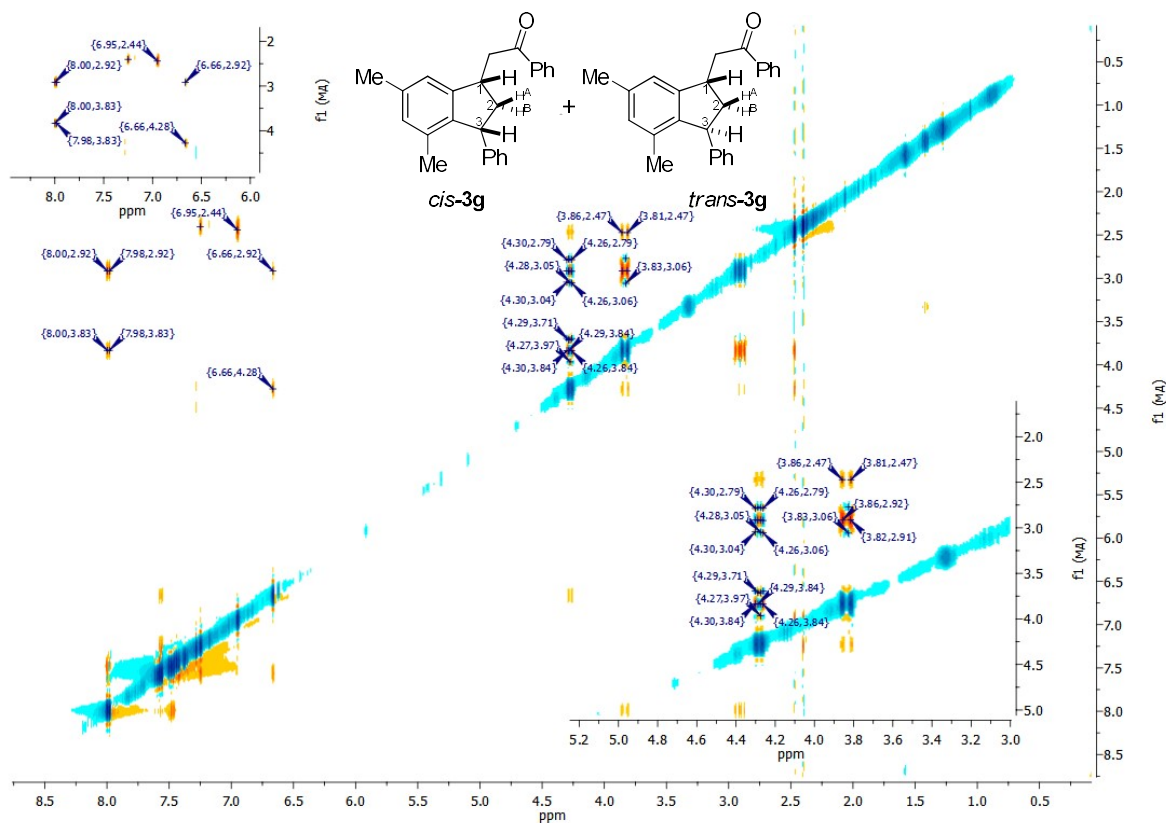

Fig. S54. NOESY spectrum of mixture of compounds *cis*-3g and *trans*-3g.

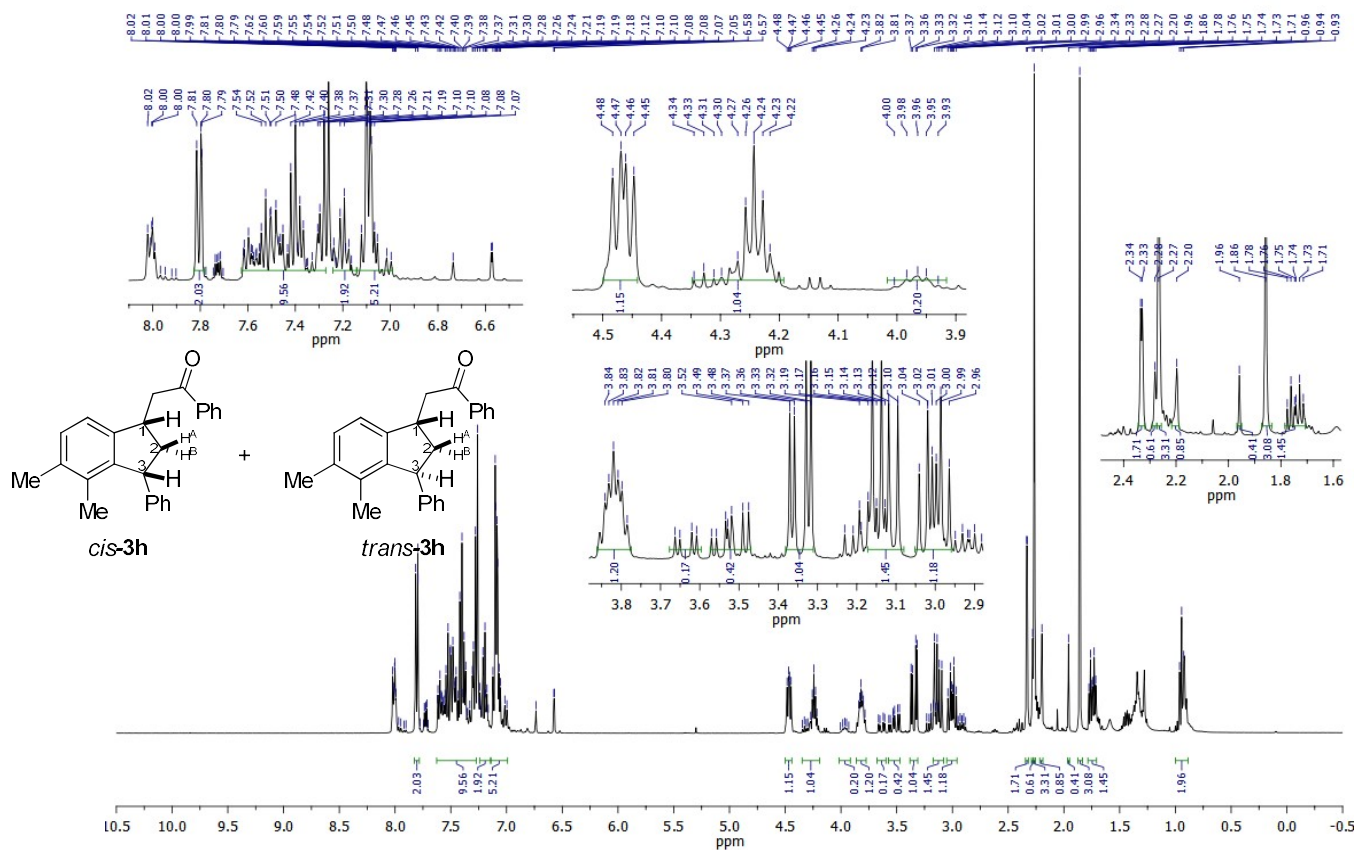

Fig. S55.  $^1\text{H}$  NMR spectrum of mixture of compounds *cis*-**3h** and *trans*-**3h** ( $\text{CDCl}_3$ , 400 MHz).

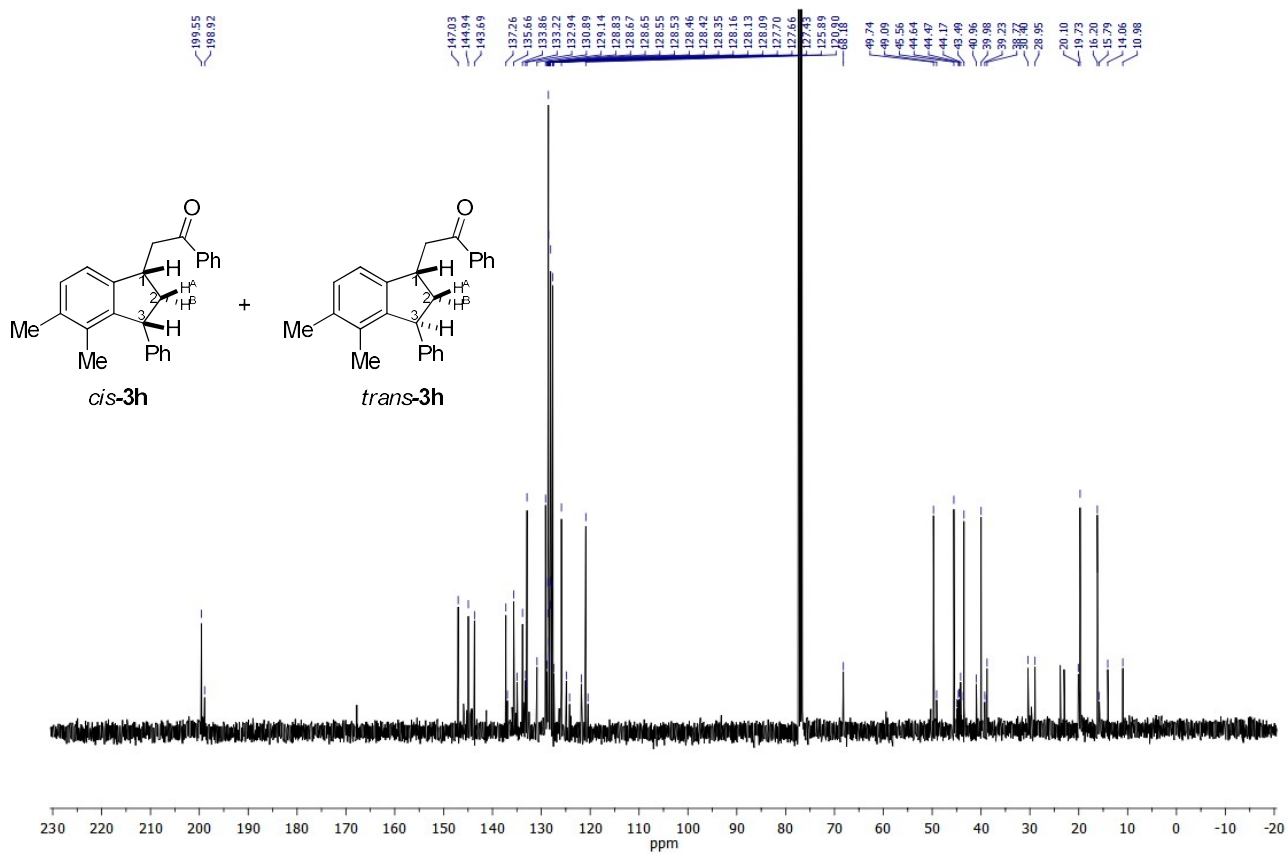

Fig. S56.  $^{13}\text{C}$  NMR spectrum of mixture of compounds *cis*-**3h** and *trans*-**3h** ( $\text{CDCl}_3$ , 101 MHz).

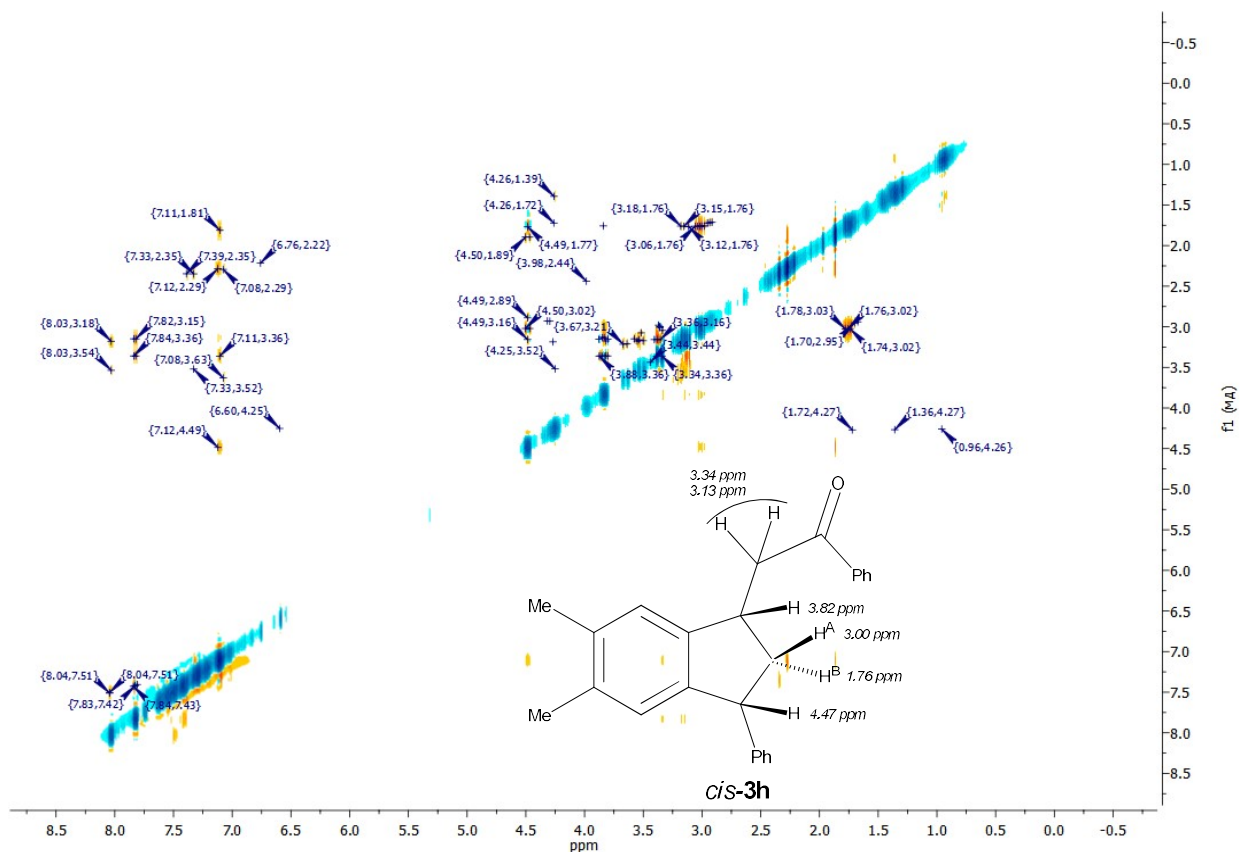

Fig. S57. NOESY spectrum of mixture of compounds *cis*-3h and *trans*-3h.

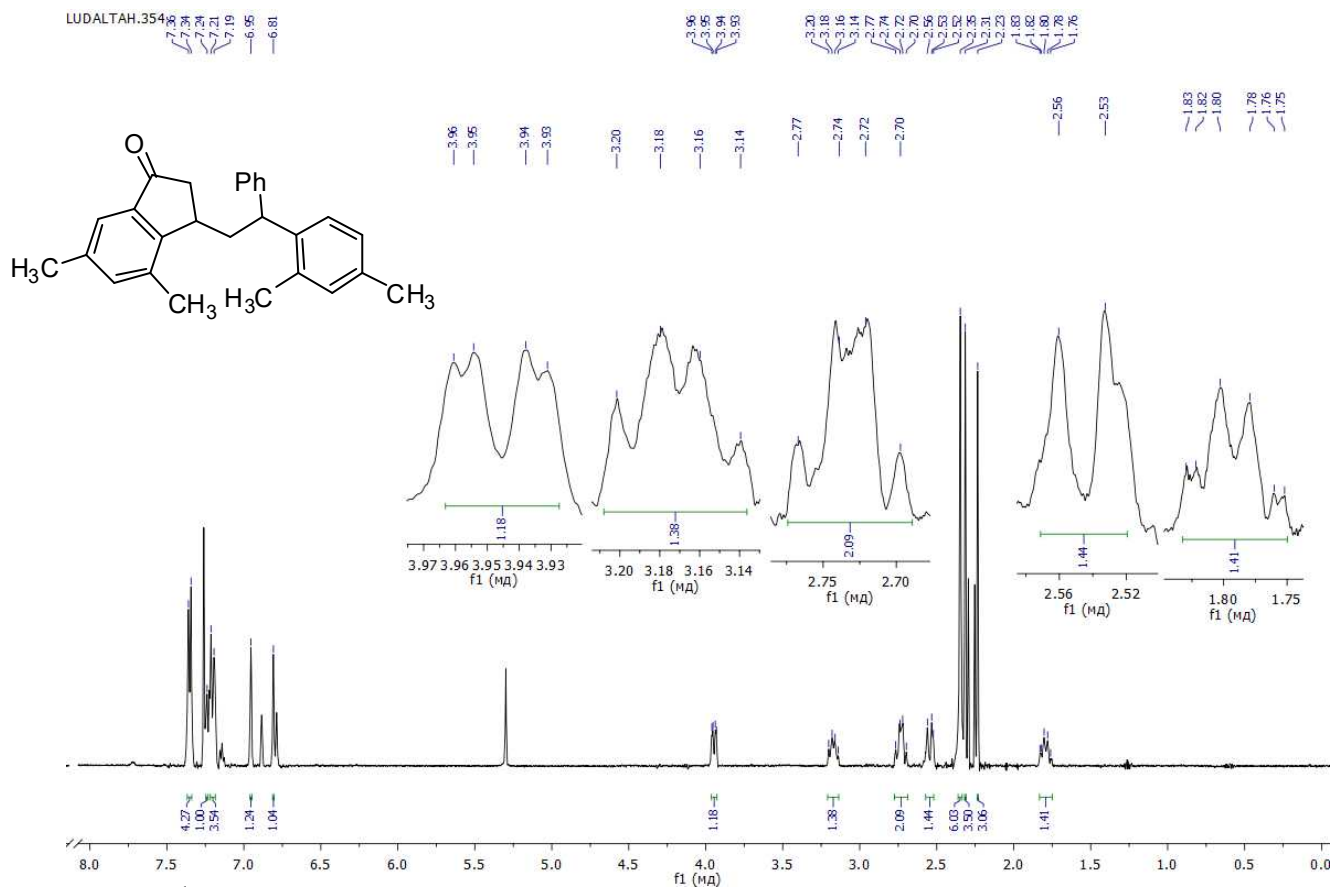

Fig. S58. <sup>1</sup>H NMR spectrum of the compound **5b** (CDCl<sub>3</sub>, 500 MHz).

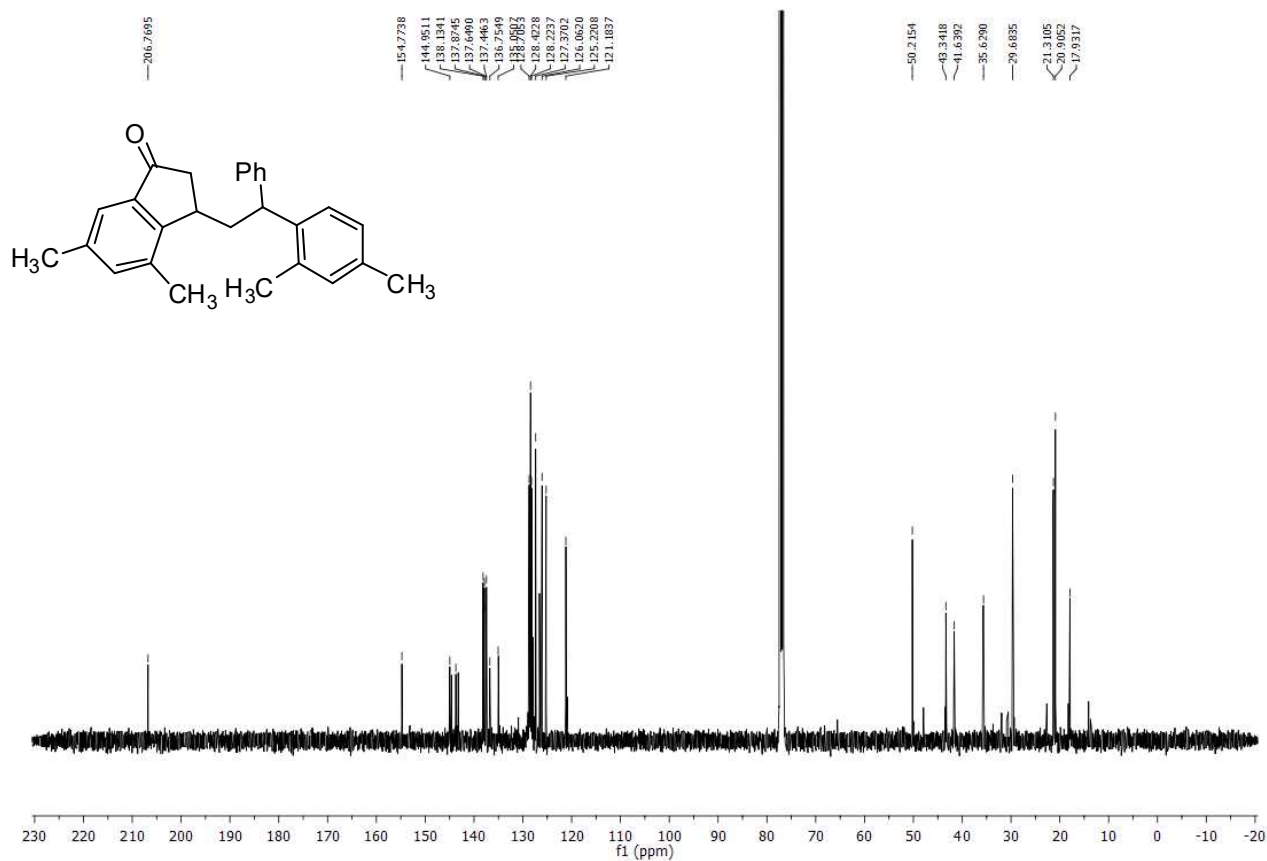

Fig. S59.  $^{13}\text{C}$  NMR spectrum of the compound **5b** ( $\text{CDCl}_3$ , 125 MHz).

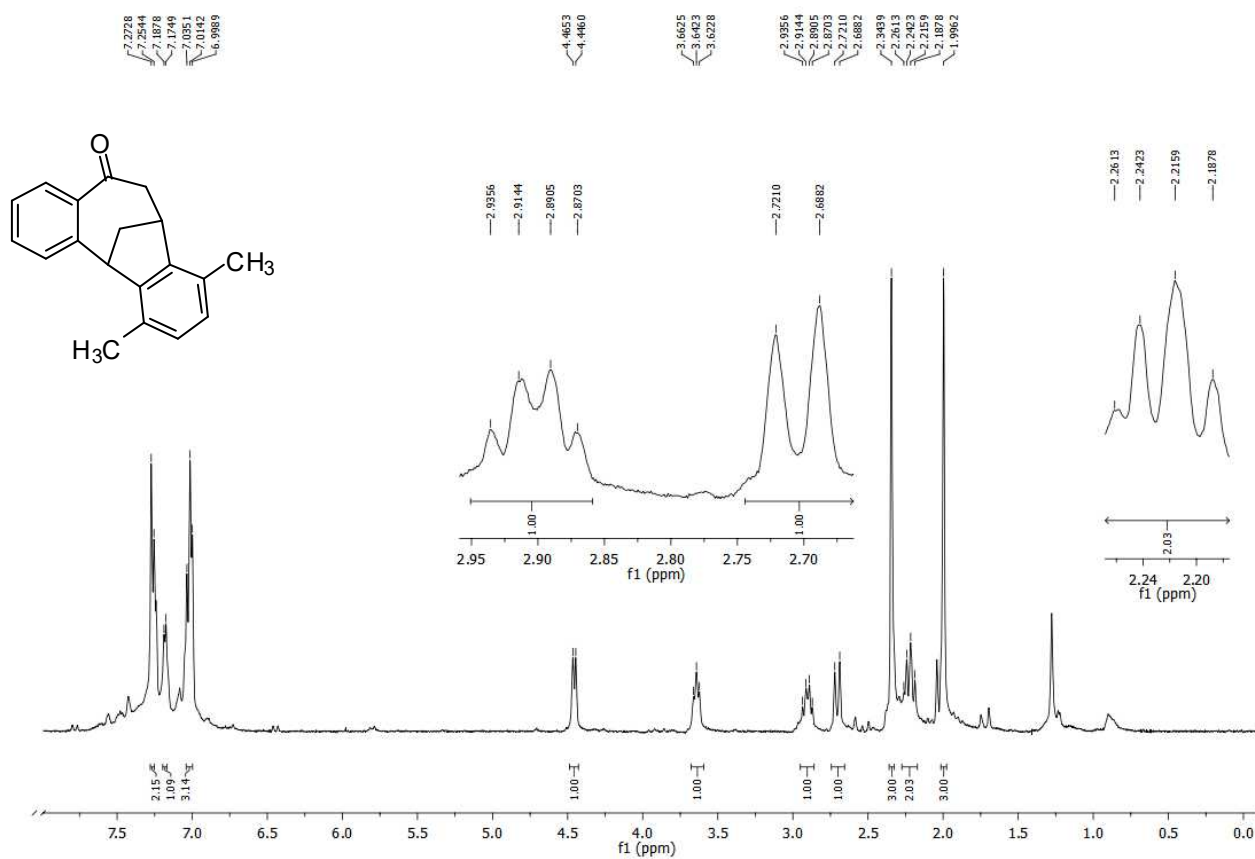

Fig. S60.  $^1\text{H}$  NMR spectrum of the compound **6a** ( $\text{CDCl}_3$ , 500 MHz).

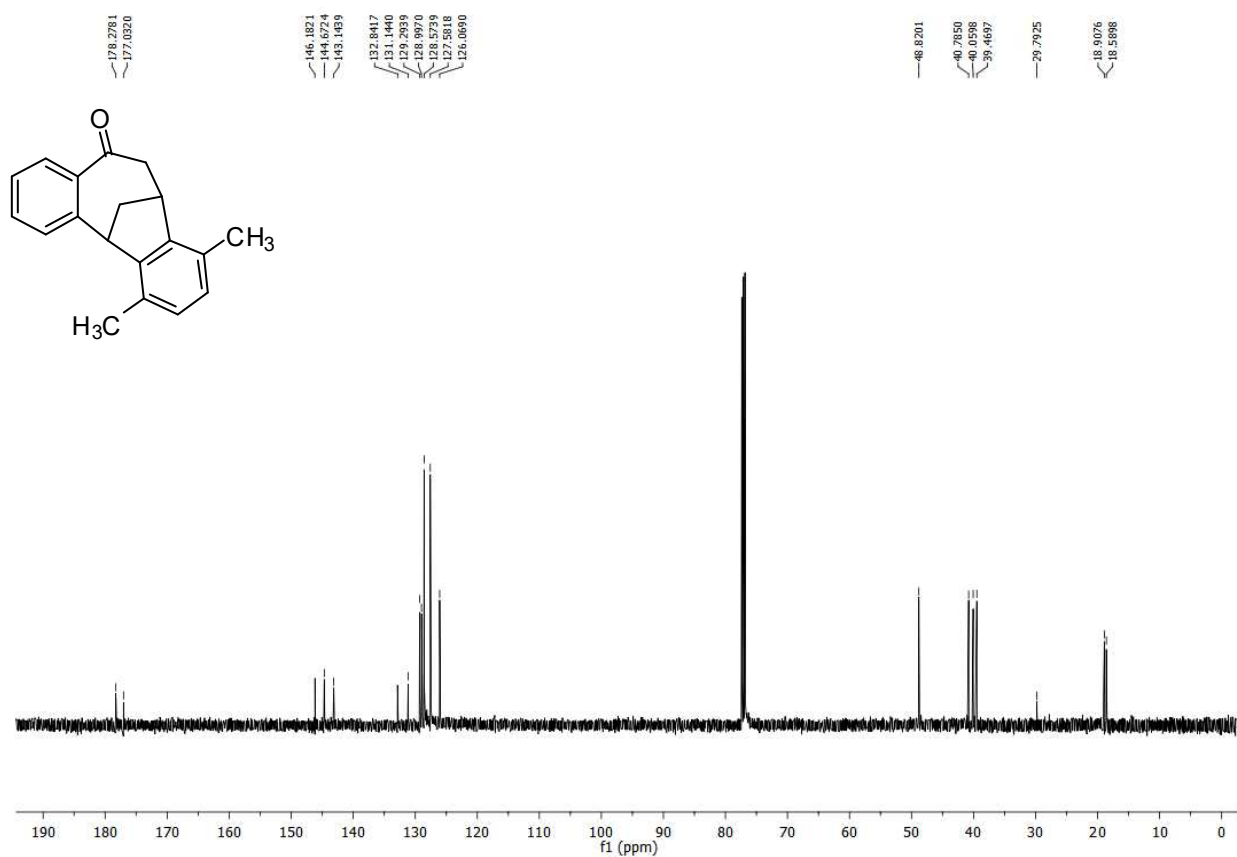

Fig. S61.  $^{13}\text{C}$  NMR spectrum of the compound **6a** (CDCl<sub>3</sub>, 125 MHz).

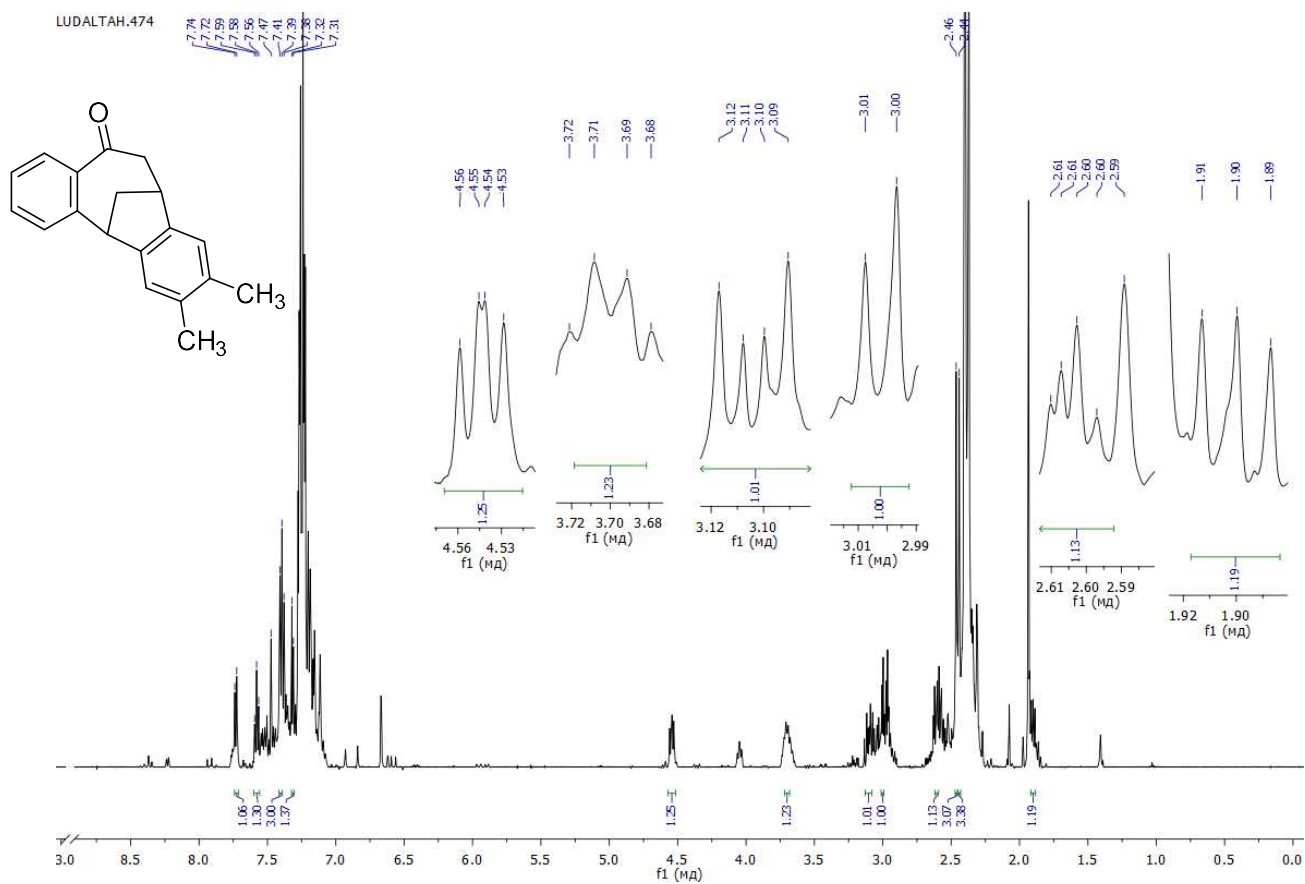

Fig. S62.  $^1\text{H}$  NMR spectrum of the compound **6b** (CDCl<sub>3</sub>, 500 MHz).

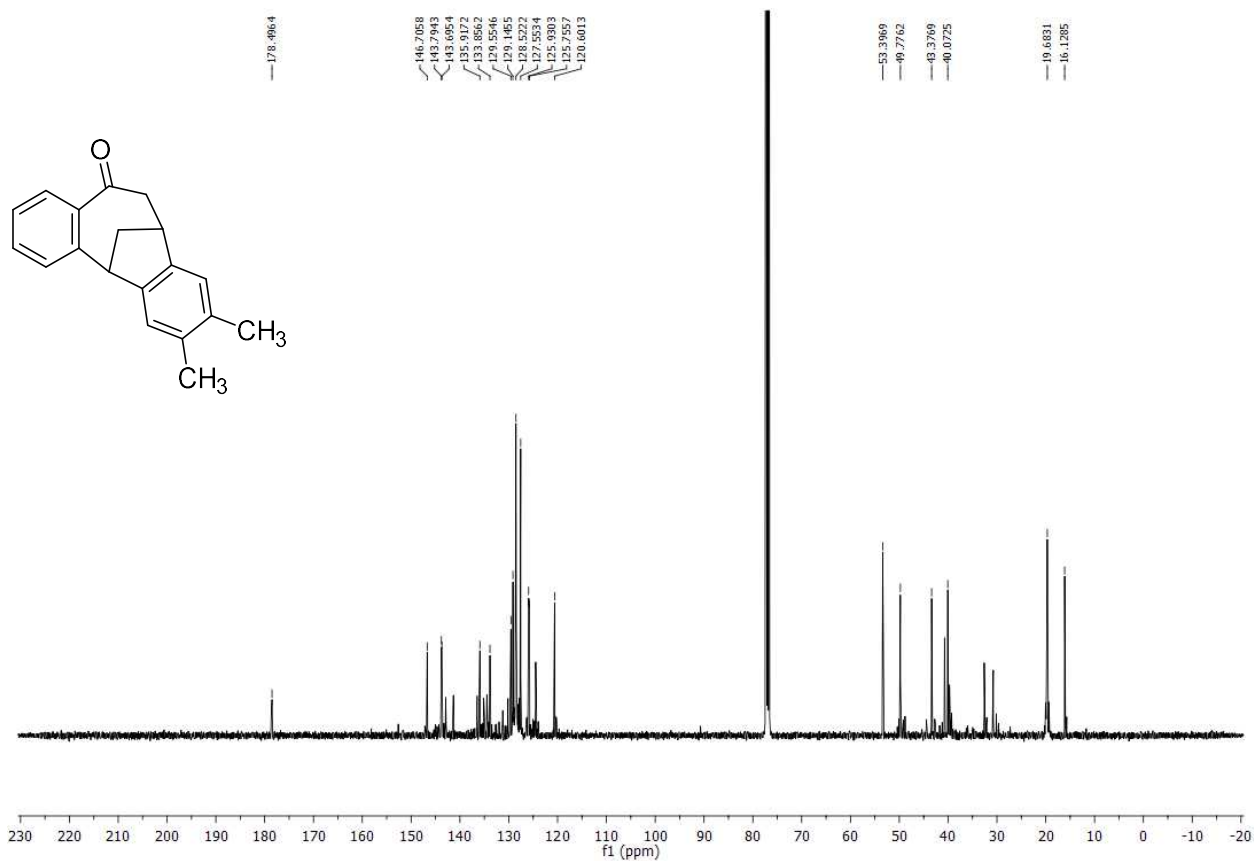

Fig. S63. <sup>13</sup>C NMR spectrum of the compound **6b** (CDCl<sub>3</sub>, 125 MHz).

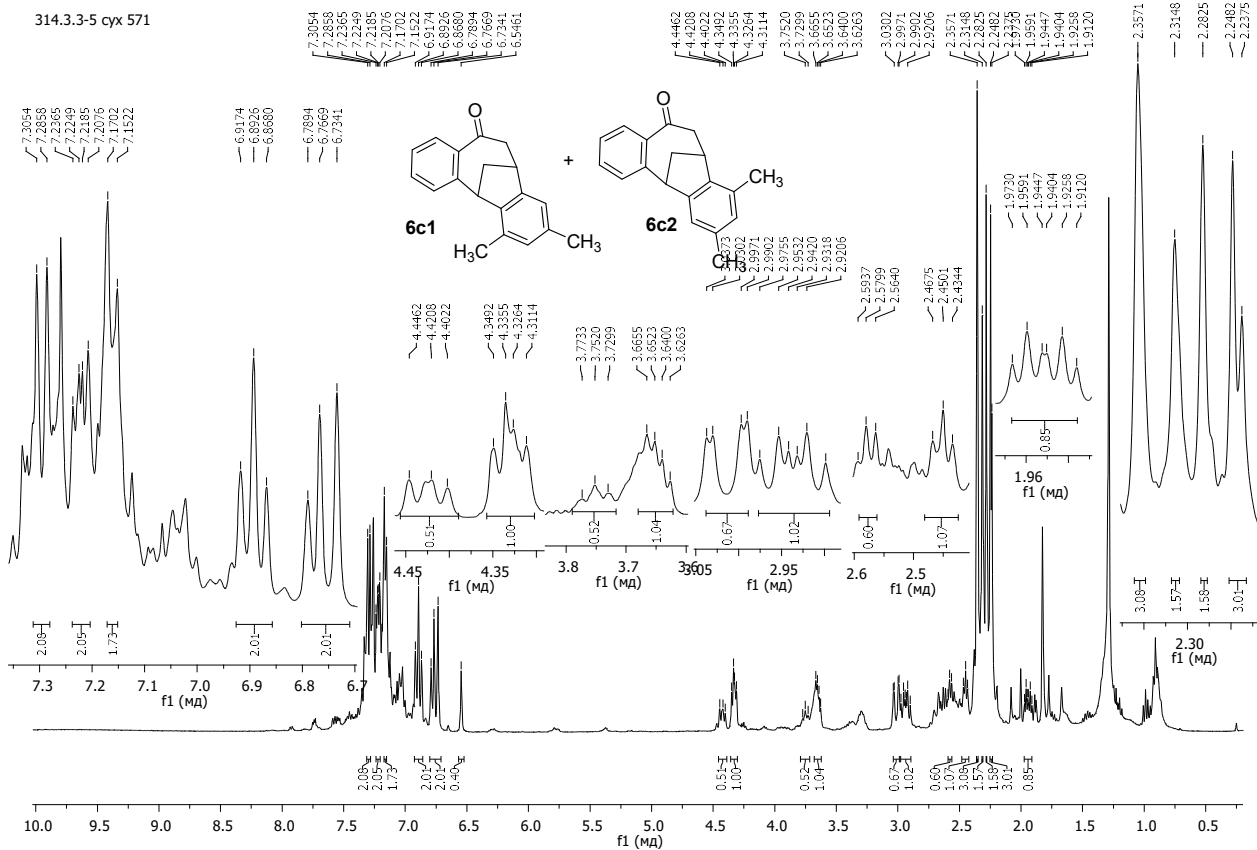

Fig. S64. <sup>1</sup>H NMR spectrum of the mixture of compounds **6c1** and **6c2** (CDCl<sub>3</sub>, 400 MHz).

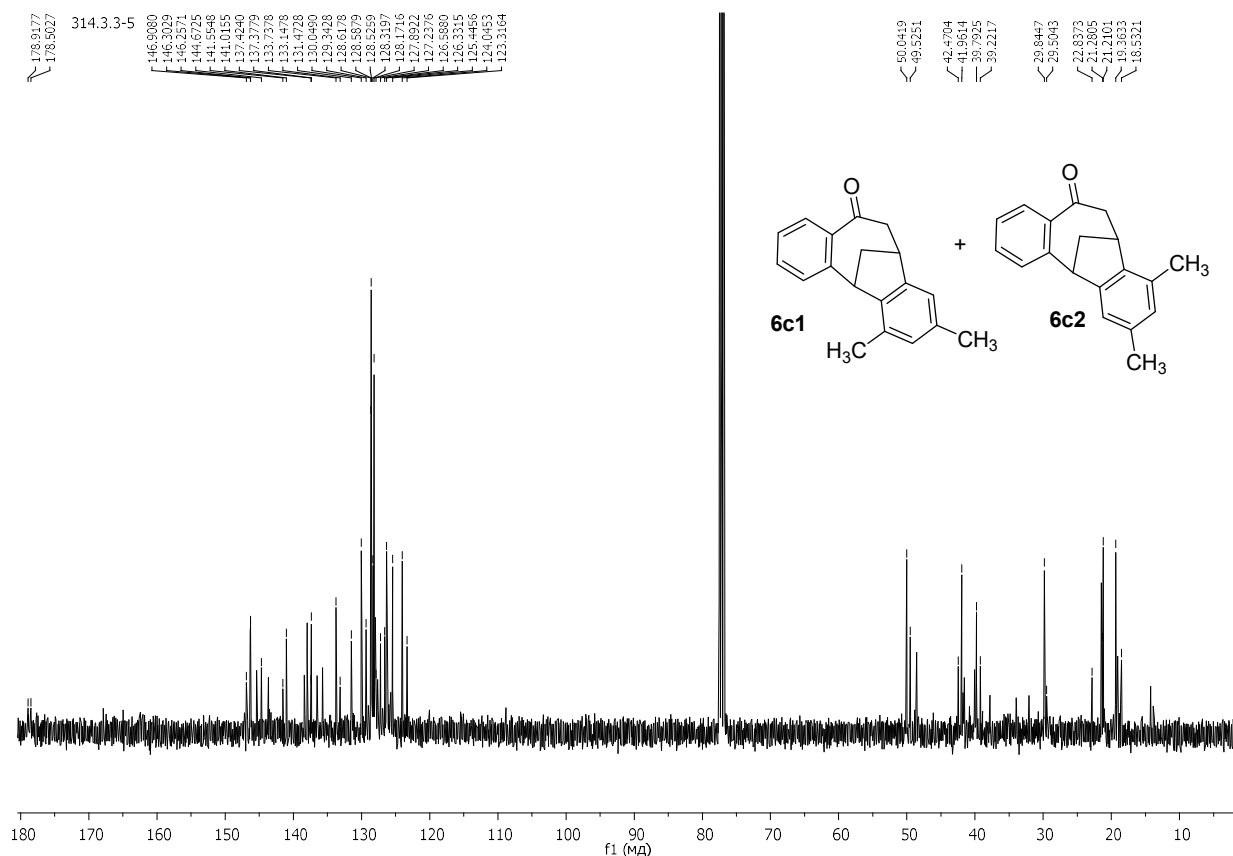

Fig. S65.  $^{13}\text{C}$  NMR spectrum of the mixture of compounds **6c1** and **6c2** ( $\text{CDCl}_3$ , 100 MHz).

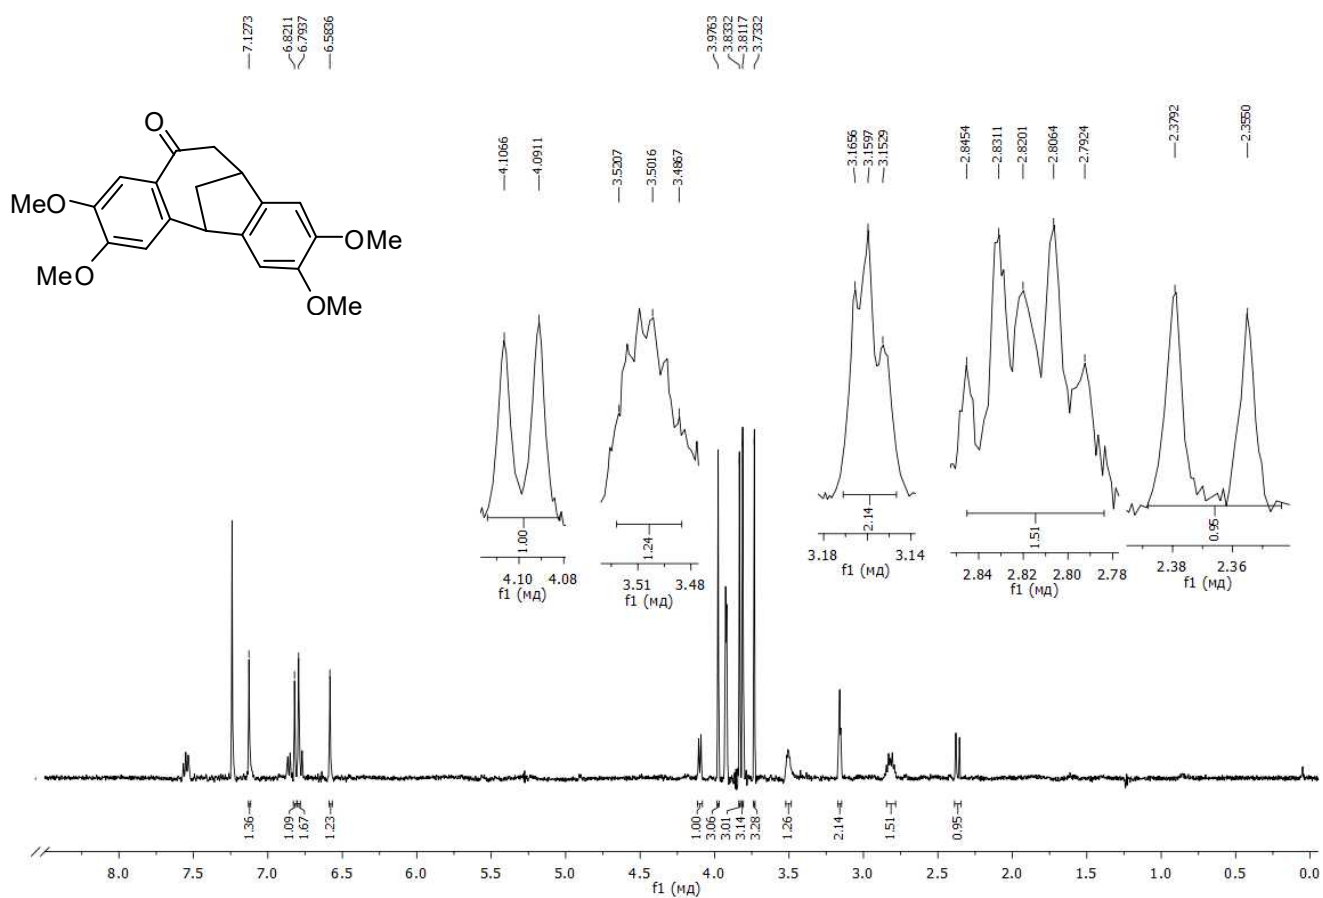

Fig. S66.  $^1\text{H}$  NMR spectrum of the compound **6d** ( $\text{CDCl}_3$ , 500 MHz).

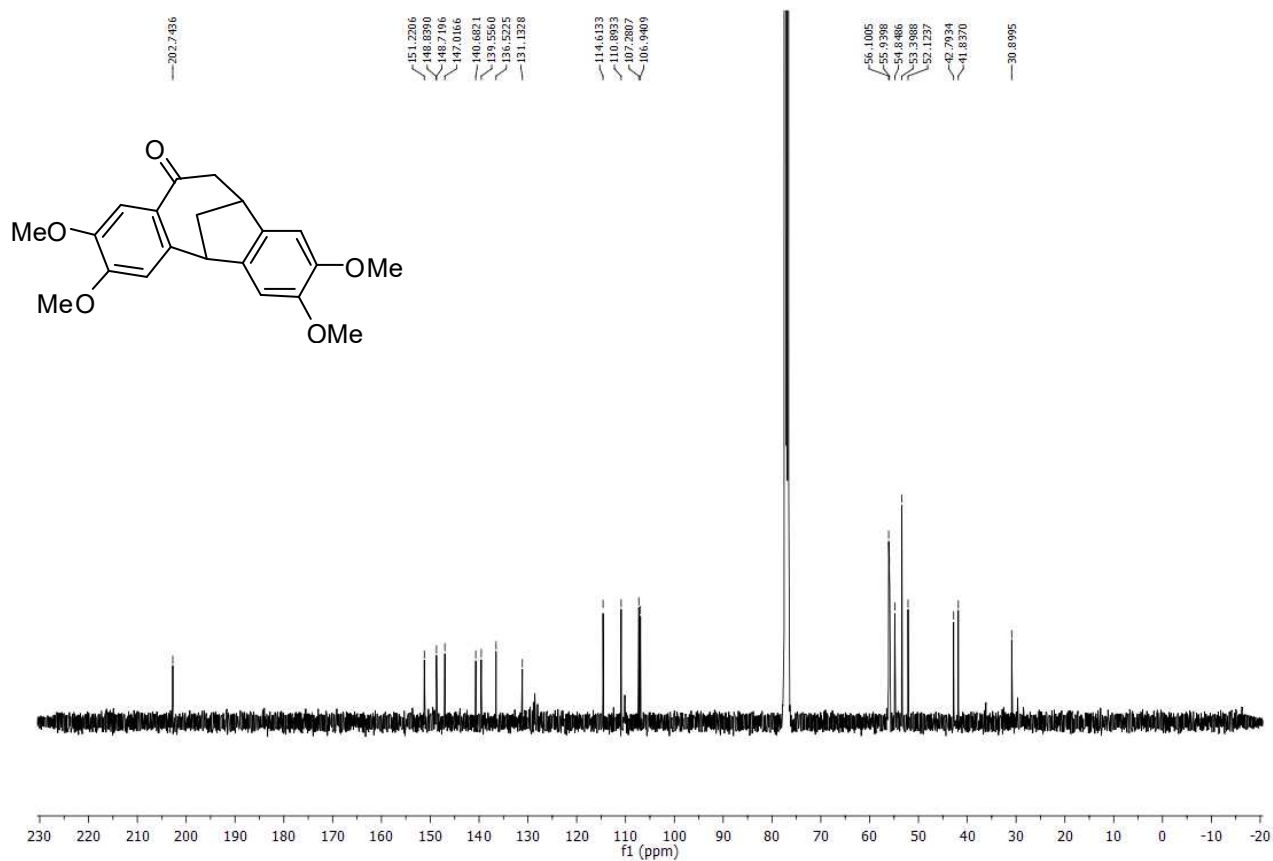

Fig. S67. <sup>13</sup>C NMR spectrum of the compound **6d** (CDCl<sub>3</sub>, 125 MHz).

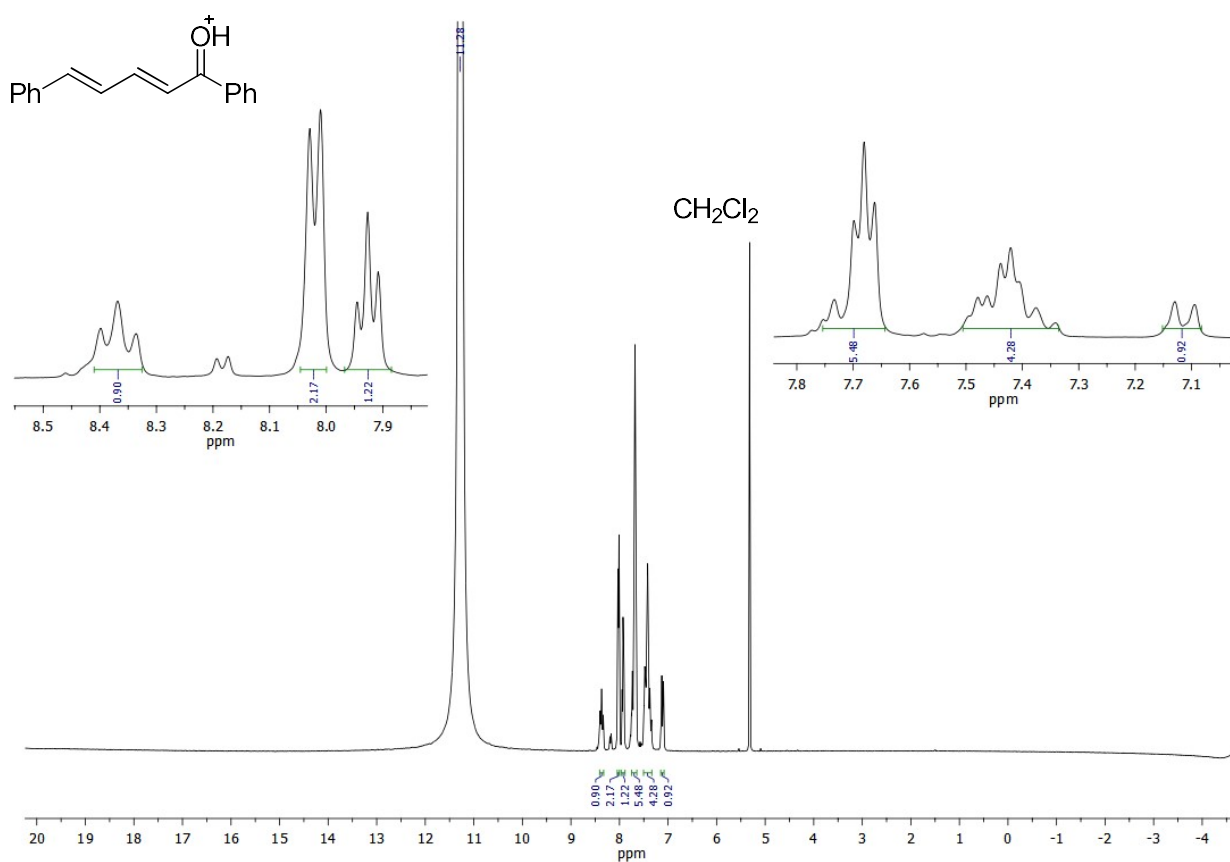

Fig. S68. <sup>1</sup>H NMR spectrum of cation **A1** generated at the protonation of **1a** in H<sub>2</sub>SO<sub>4</sub> (H<sub>2</sub>SO<sub>4</sub>, room temperature, CH<sub>2</sub>Cl<sub>2</sub>, as internal standard, 400 MHz).



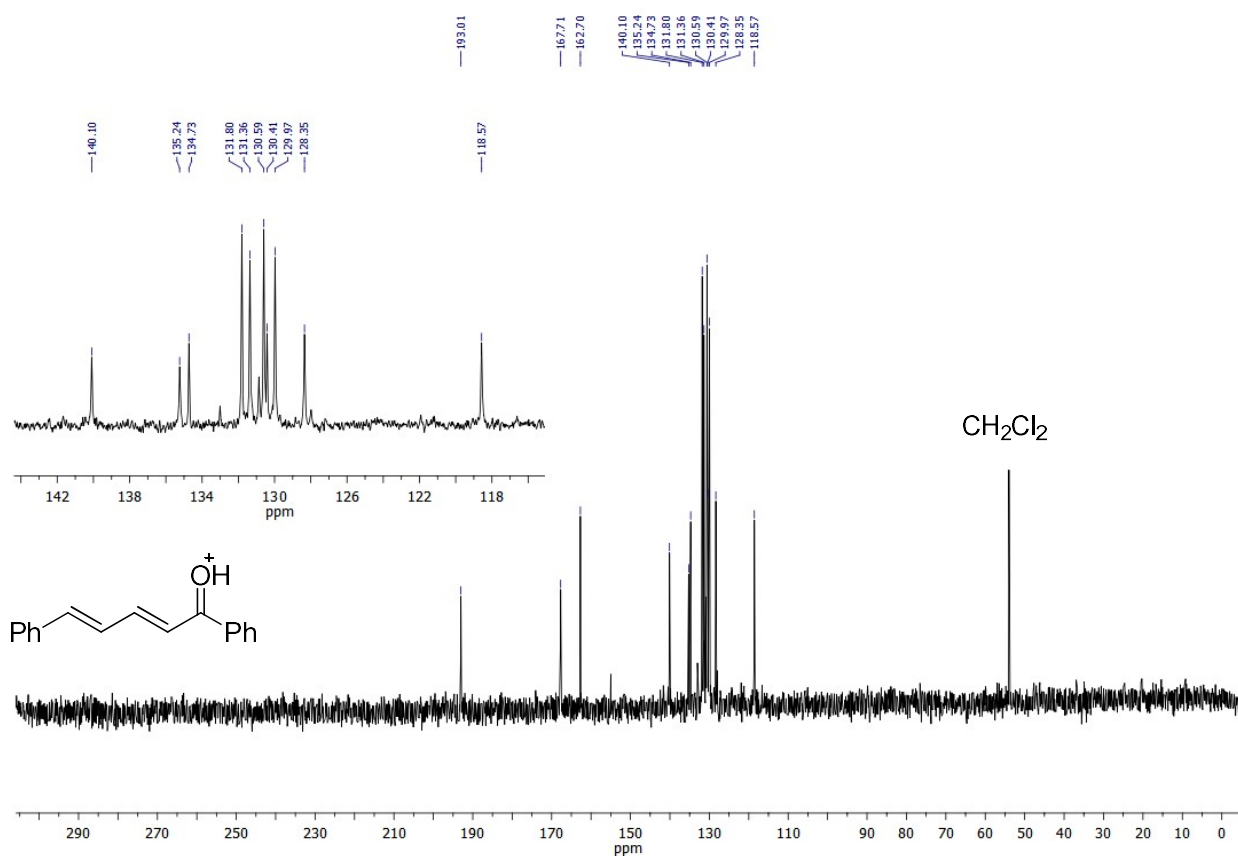

Fig. S69.  $^{13}\text{C}$  NMR spectrum of cation **A1** generated at the protonation of **1a** in  $\text{H}_2\text{SO}_4$  ( $\text{H}_2\text{SO}_4$ , room temperature,  $\text{CH}_2\text{Cl}_2$ , as internal standard, 100 MHz).

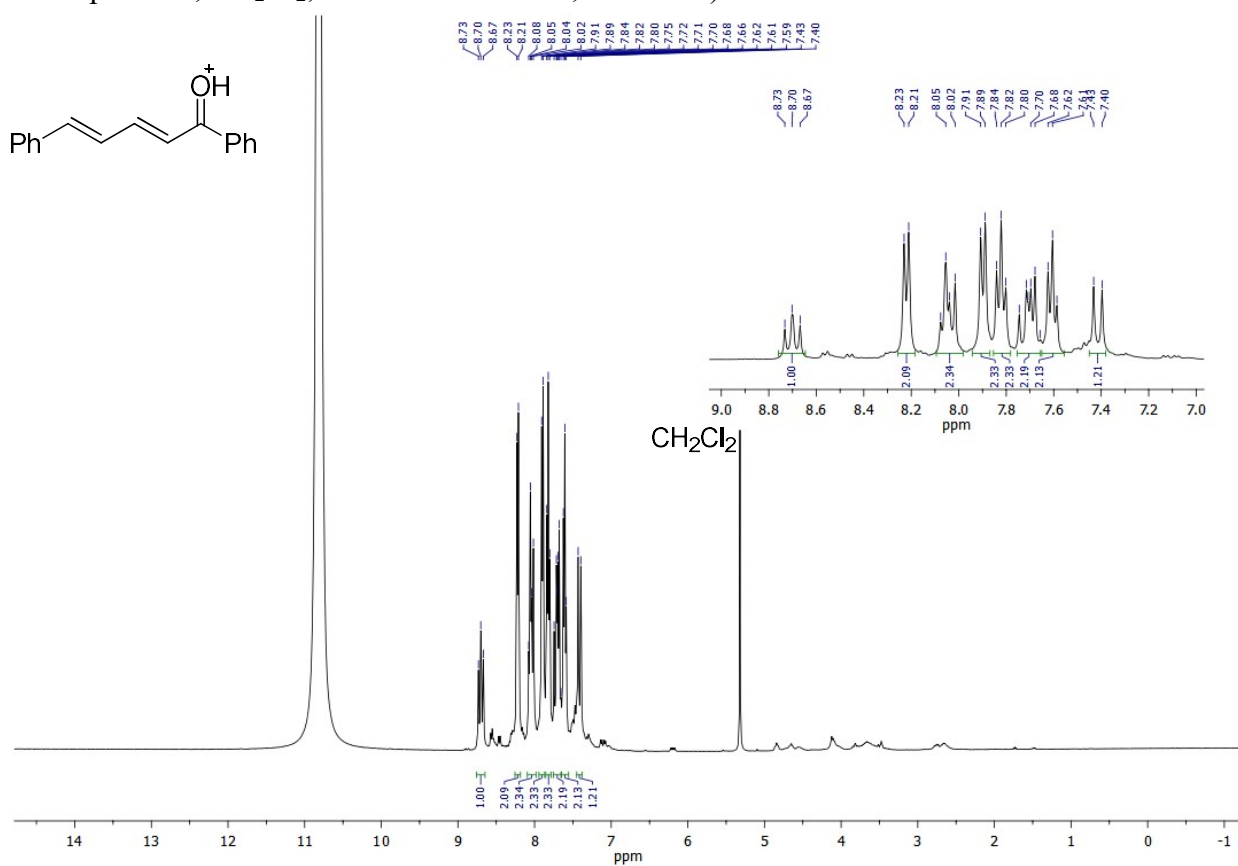

Fig. S70.  $^1\text{H}$  NMR spectrum of cation **A1** generated at the protonation of **1a** in  $\text{TfOH}$  ( $\text{TfOH}$ ,  $-40^\circ\text{C}$ ,  $\text{CH}_2\text{Cl}_2$ , as internal standard, 400 MHz).

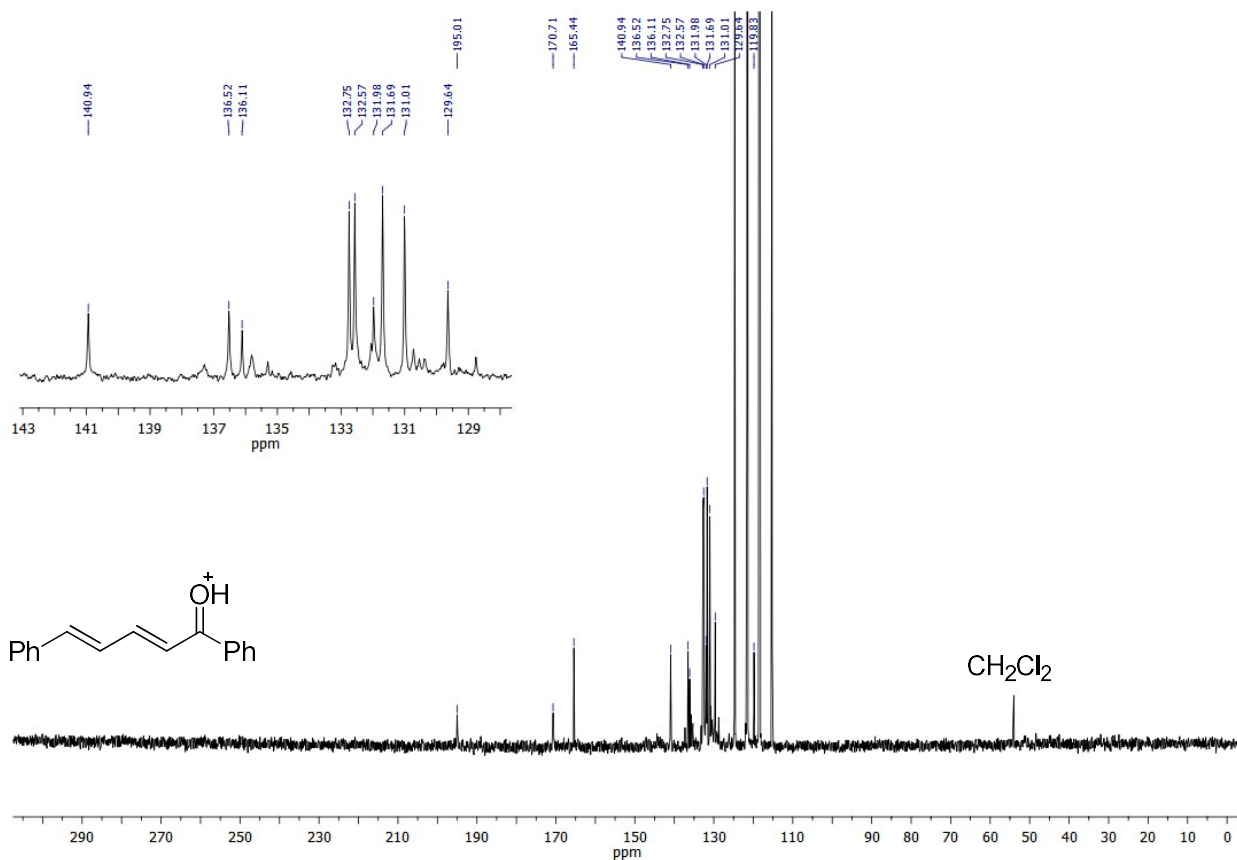

Fig. S71.  $^{13}\text{C}$  NMR spectrum of cation **A1** generated at the protonation of **1a** in TfOH (TfOH, -40°C,  $\text{CH}_2\text{Cl}_2$ , as internal standard, 100 MHz).

### III. X-Ray data of compounds 2a, 3h, 6a

#### 2a

CCDC 1545936 – (2a)

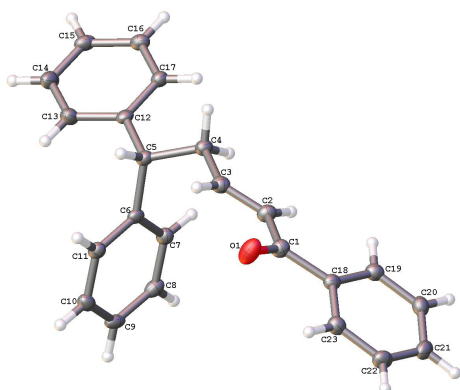

**Table S1. Crystal data and structure refinement for 2a.**

|                                             |                                                               |
|---------------------------------------------|---------------------------------------------------------------|
| Identificationcode                          | 2a                                                            |
| Empiricalformula                            | C <sub>23</sub> H <sub>20</sub> O                             |
| Formula weight                              | 312.39                                                        |
| Temperature/K                               | 100(2)                                                        |
| Crystalsystem                               | triclinic                                                     |
| Spacegroup                                  | P-1                                                           |
| a/Å                                         | 5.7804(3)                                                     |
| b/Å                                         | 8.8933(7)                                                     |
| c/Å                                         | 16.3510(11)                                                   |
| α/°                                         | 87.212(6)                                                     |
| β/°                                         | 84.983(5)                                                     |
| γ/°                                         | 89.862(6)                                                     |
| Volume/Å <sup>3</sup>                       | 836.34(10)                                                    |
| Z                                           | 2                                                             |
| ρ <sub>calc</sub> /cm <sup>3</sup>          | 1.240                                                         |
| μ/mm <sup>-1</sup>                          | 0.074                                                         |
| F(000)                                      | 332.0                                                         |
| Crystalsize/mm <sup>3</sup>                 | 0.36 × 0.18 × 0.12                                            |
| Radiation                                   | MoKα (λ = 0.71073)                                            |
| 2θ range for data collection/°              | 6.626 to 54.982                                               |
| Indexranges                                 | -7 ≤ h ≤ 7, -10 ≤ k ≤ 11, -14 ≤ l ≤ 21                        |
| Reflectionscollected                        | 7027                                                          |
| Independentreflections                      | 3839 [R <sub>int</sub> = 0.0342, R <sub>sigma</sub> = 0.0517] |
| Data/restraints/parameters                  | 3839/0/217                                                    |
| Goodness-of-fit on F <sup>2</sup>           | 1.030                                                         |
| Final R indexes [I ≥ 2σ (I)]                | R <sub>1</sub> = 0.0533, wR <sub>2</sub> = 0.1356             |
| Final R indexes [all data]                  | R <sub>1</sub> = 0.0637, wR <sub>2</sub> = 0.1470             |
| Largest diff. peak/hole / e Å <sup>-3</sup> | 0.36/-0.25                                                    |

**Table S2. Fractional Atomic Coordinates ( $\times 10^4$ ) and Equivalent Isotropic Displacement Parameters ( $\text{\AA}^2 \times 10^3$ ) for 2a.  $U_{\text{eq}}$  is defined as 1/3 of the trace of the orthogonalised  $U_{ij}$  tensor.**

| Atom | x           | y           | z           | $U(\text{eq})$ |
|------|-------------|-------------|-------------|----------------|
| C5   | 1916(2)     | 9733.7(16)  | 2913.0(9)   | 18.3(3)        |
| C17  | 5526(2)     | 8063.7(16)  | 2982.8(9)   | 20.1(3)        |
| C18  | -830(2)     | 12950.5(16) | -259.7(9)   | 18.7(3)        |
| C6   | 2023(2)     | 11386.1(16) | 3124.5(8)   | 17.5(3)        |
| C23  | -2595(3)    | 13917.9(18) | -482.7(9)   | 22.7(3)        |
| O1   | -3358.4(18) | 11647.9(15) | 747.4(8)    | 34.1(3)        |
| C15  | 6832(3)     | 7187.4(17)  | 4280.5(10)  | 24.3(3)        |
| C1   | -1339(3)    | 11889.4(17) | 476.0(9)    | 22.2(3)        |
| C12  | 3668(2)     | 8816.7(16)  | 3377.0(9)   | 18.5(3)        |
| C21  | -66(3)      | 15046.2(18) | -1581.5(9)  | 25.5(3)        |
| C8   | 4112(3)     | 13734.4(18) | 3130.8(9)   | 23.2(3)        |
| C11  | 170(2)      | 12037.4(17) | 3580.3(9)   | 19.9(3)        |
| C4   | 2179(3)     | 9525.6(17)  | 1978.0(9)   | 20.9(3)        |
| C2   | 636(3)      | 11191.5(17) | 873.9(9)    | 22.0(3)        |
| C19  | 1333(3)     | 13028.6(17) | -716.0(9)   | 21.6(3)        |
| C14  | 4982(3)     | 7932.4(18)  | 4683(1)     | 28.9(4)        |
| C9   | 2263(3)     | 14371.4(17) | 3593.5(9)   | 23.5(3)        |
| C20  | 1694(3)     | 14073.1(18) | -1375.1(9)  | 24.4(3)        |
| C7   | 3996(2)     | 12261.5(17) | 2894.3(9)   | 20.7(3)        |
| C3   | 289(3)      | 10293.1(17) | 1544.2(9)   | 21.3(3)        |
| C13  | 3416(3)     | 8732.4(18)  | 4236.0(9)   | 25.8(3)        |
| C10  | 280(3)      | 13519.7(18) | 3814.2(9)   | 23.1(3)        |
| C16  | 7098(3)     | 7248.8(17)  | 3430.2(10)  | 22.1(3)        |
| C22  | -2216(3)    | 14964.4(18) | -1135.9(10) | 25.9(3)        |

**Table S3. Anisotropic Displacement Parameters ( $\text{\AA}^2 \times 10^3$ ) for 2a. The Anisotropic displacement factor exponent takes the form:  $-2\pi^2 [h^2 a^{*2} U_{11} + 2hka^* b^* U_{12} + \dots]$ .**

| Atom | $U_{11}$ | $U_{22}$ | $U_{33}$ | $U_{23}$ | $U_{13}$ | $U_{12}$ |
|------|----------|----------|----------|----------|----------|----------|
| C5   | 19.9(7)  | 15.4(7)  | 19.5(7)  | 1.2(5)   | -1.7(5)  | 0.1(5)   |
| C17  | 24.8(7)  | 16.9(7)  | 18.4(7)  | 0.8(5)   | -2.8(6)  | 1.1(6)   |
| C18  | 22.2(7)  | 17.4(7)  | 17.3(7)  | -2.5(5)  | -5.7(5)  | 0.9(5)   |
| C6   | 21.9(7)  | 14.9(7)  | 16.2(6)  | 1.3(5)   | -6.3(5)  | 2.8(5)   |
| C23  | 22.4(7)  | 24.9(8)  | 21.4(7)  | -2.8(6)  | -3.8(6)  | 2.9(6)   |
| O1   | 20.9(6)  | 43.5(8)  | 36.1(7)  | 13.9(6)  | -2.3(5)  | -1.1(5)  |
| C15  | 31.5(8)  | 16.8(7)  | 26.0(8)  | 0.4(6)   | -11.1(6) | 2.9(6)   |
| C1   | 21.5(7)  | 22.6(8)  | 22.8(7)  | -0.4(6)  | -4.2(6)  | 0.2(6)   |
| C12  | 24.3(7)  | 11.8(6)  | 19.5(7)  | 0.9(5)   | -3.9(5)  | -1.2(5)  |
| C21  | 37.6(9)  | 23.0(8)  | 16.4(7)  | 0.6(6)   | -5.8(6)  | 0.0(6)   |
| C8   | 25.7(7)  | 21.1(8)  | 23.4(7)  | 4.7(6)   | -7.7(6)  | -2.9(6)  |
| C11  | 19.8(7)  | 19.0(7)  | 20.8(7)  | 1.2(6)   | -3.0(5)  | 1.6(5)   |

|     |          |         |         |         |          |         |
|-----|----------|---------|---------|---------|----------|---------|
| C4  | 25.9(7)  | 17.6(7) | 19.5(7) | -0.4(6) | -4.4(6)  | 2.0(6)  |
| C2  | 21.2(7)  | 21.0(8) | 24.1(7) | 0.5(6)  | -5.1(6)  | 1.5(6)  |
| C19 | 22.6(7)  | 20.8(7) | 22.1(7) | -3.1(6) | -4.9(6)  | 2.8(6)  |
| C14 | 46.2(10) | 23.5(8) | 17.8(7) | -1.6(6) | -7.0(7)  | 7.5(7)  |
| C9  | 36.7(8)  | 13.7(7) | 21.6(7) | -0.9(6) | -11.9(6) | 3.8(6)  |
| C20 | 27.9(8)  | 26.3(8) | 18.8(7) | -3.5(6) | 0.8(6)   | -0.7(6) |
| C7  | 20.8(7)  | 20.4(7) | 20.5(7) | 0.7(6)  | -1.4(5)  | 2.6(6)  |
| C3  | 22.6(7)  | 19.7(7) | 22.3(7) | -2.5(6) | -4.4(6)  | 0.1(6)  |
| C13 | 34.1(8)  | 22.2(8) | 21.0(7) | -2.0(6) | -1.5(6)  | 8.0(6)  |
| C10 | 27.4(8)  | 23.0(8) | 19.4(7) | -2.6(6) | -4.1(6)  | 8.9(6)  |
| C16 | 22.7(7)  | 17.9(7) | 25.7(8) | 0.3(6)  | -3.1(6)  | 2.1(6)  |
| C22 | 31.2(8)  | 24.8(8) | 22.7(7) | -0.7(6) | -8.7(6)  | 7.1(6)  |

**Table S4. Bond Lengths for 2a.**

| Atom | Atom | Length/Å   | Atom | Atom | Length/Å |
|------|------|------------|------|------|----------|
| C5   | C6   | 1.5285(19) | C15  | C16  | 1.384(2) |
| C5   | C12  | 1.5284(19) | C1   | C2   | 1.483(2) |
| C5   | C4   | 1.543(2)   | C12  | C13  | 1.398(2) |
| C17  | C12  | 1.391(2)   | C21  | C20  | 1.387(2) |
| C17  | C16  | 1.395(2)   | C21  | C22  | 1.385(2) |
| C18  | C23  | 1.395(2)   | C8   | C9   | 1.390(2) |
| C18  | C1   | 1.501(2)   | C8   | C7   | 1.387(2) |
| C18  | C19  | 1.399(2)   | C11  | C10  | 1.393(2) |
| C6   | C11  | 1.392(2)   | C4   | C3   | 1.499(2) |
| C6   | C7   | 1.396(2)   | C2   | C3   | 1.325(2) |
| C23  | C22  | 1.385(2)   | C19  | C20  | 1.390(2) |
| O1   | C1   | 1.2274(18) | C14  | C13  | 1.386(2) |
| C15  | C14  | 1.389(2)   | C9   | C10  | 1.387(2) |

**Table S5. Bond Angles for 2a.**

| Atom | Atom | Atom | Angle/°    | Atom | Atom | Atom | Angle/°    |
|------|------|------|------------|------|------|------|------------|
| C6   | C5   | C4   | 112.61(11) | C13  | C12  | C5   | 119.00(13) |
| C12  | C5   | C6   | 109.90(11) | C22  | C21  | C20  | 119.87(14) |
| C12  | C5   | C4   | 113.14(12) | C7   | C8   | C9   | 120.78(14) |
| C12  | C17  | C16  | 121.10(14) | C6   | C11  | C10  | 121.19(14) |
| C23  | C18  | C1   | 117.88(13) | C3   | C4   | C5   | 112.49(12) |
| C23  | C18  | C19  | 119.05(13) | C3   | C2   | C1   | 121.19(14) |
| C19  | C18  | C1   | 123.05(13) | C20  | C19  | C18  | 119.70(14) |
| C11  | C6   | C5   | 120.32(13) | C13  | C14  | C15  | 120.25(14) |
| C11  | C6   | C7   | 118.39(13) | C10  | C9   | C8   | 119.24(14) |
| C7   | C6   | C5   | 121.24(13) | C21  | C20  | C19  | 120.64(14) |
| C22  | C23  | C18  | 120.90(14) | C8   | C7   | C6   | 120.45(13) |
| C16  | C15  | C14  | 119.52(14) | C2   | C3   | C4   | 124.67(14) |
| O1   | C1   | C18  | 119.81(13) | C14  | C13  | C12  | 121.02(14) |

|     |     |     |            |     |     |     |            |
|-----|-----|-----|------------|-----|-----|-----|------------|
| O1  | C1  | C2  | 121.52(14) | C9  | C10 | C11 | 119.94(14) |
| C2  | C1  | C18 | 118.64(12) | C15 | C16 | C17 | 120.04(14) |
| C17 | C12 | C5  | 122.94(13) | C21 | C22 | C23 | 119.83(15) |
| C17 | C12 | C13 | 118.06(13) |     |     |     |            |

**Table S6. Torsion Angles for 2a.**

| A   | B   | C   | D   | Angle/°     | A   | B   | C   | D   | Angle/°     |
|-----|-----|-----|-----|-------------|-----|-----|-----|-----|-------------|
| C5  | C6  | C11 | C10 | 176.77(13)  | C12 | C5  | C6  | C7  | 66.04(16)   |
| C5  | C6  | C7  | C8  | -176.39(13) | C12 | C5  | C4  | C3  | 173.62(12)  |
| C5  | C12 | C13 | C14 | -179.03(14) | C12 | C17 | C16 | C15 | -0.4(2)     |
| C5  | C4  | C3  | C2  | 131.13(16)  | C8  | C9  | C10 | C11 | 0.8(2)      |
| C17 | C12 | C13 | C14 | 0.5(2)      | C11 | C6  | C7  | C8  | 1.3(2)      |
| C18 | C23 | C22 | C21 | 0.7(2)      | C4  | C5  | C6  | C11 | 121.29(14)  |
| C18 | C1  | C2  | C3  | 177.31(14)  | C4  | C5  | C6  | C7  | -61.09(17)  |
| C18 | C19 | C20 | C21 | 0.4(2)      | C4  | C5  | C12 | C17 | 9.45(19)    |
| C6  | C5  | C12 | C17 | -117.38(15) | C4  | C5  | C12 | C13 | -171.03(13) |
| C6  | C5  | C12 | C13 | 62.15(17)   | C19 | C18 | C23 | C22 | -1.2(2)     |
| C6  | C5  | C4  | C3  | -61.00(16)  | C19 | C18 | C1  | O1  | -165.07(15) |
| C6  | C11 | C10 | C9  | -0.1(2)     | C19 | C18 | C1  | C2  | 16.8(2)     |
| C23 | C18 | C1  | O1  | 16.2(2)     | C14 | C15 | C16 | C17 | 0.5(2)      |
| C23 | C18 | C1  | C2  | -161.91(14) | C9  | C8  | C7  | C6  | -0.6(2)     |
| C23 | C18 | C19 | C20 | 0.7(2)      | C20 | C21 | C22 | C23 | 0.4(2)      |
| O1  | C1  | C2  | C3  | -0.8(2)     | C7  | C6  | C11 | C10 | -0.9(2)     |
| C15 | C14 | C13 | C12 | -0.5(3)     | C7  | C8  | C9  | C10 | -0.4(2)     |
| C1  | C18 | C23 | C22 | 177.55(14)  | C16 | C17 | C12 | C5  | 179.46(13)  |
| C1  | C18 | C19 | C20 | -178.05(14) | C16 | C17 | C12 | C13 | -0.1(2)     |
| C1  | C2  | C3  | C4  | 179.11(14)  | C16 | C15 | C14 | C13 | 0.0(2)      |
| C12 | C5  | C6  | C11 | -111.58(14) | C22 | C21 | C20 | C19 | -1.0(2)     |

**Table S7. Hydrogen Atom Coordinates ( $\text{\AA} \times 10^4$ ) and Isotropic Displacement Parameters ( $\text{\AA}^2 \times 10^3$ ) for 2a.**

| Atom | x     | y     | z     | U(eq) |
|------|-------|-------|-------|-------|
| H5   | 368   | 9361  | 3118  | 22    |
| H17  | 5725  | 8104  | 2412  | 24    |
| H23  | -4047 | 13859 | -189  | 27    |
| H15  | 7883  | 6651  | 4580  | 29    |
| H21  | 198   | 15752 | -2018 | 31    |
| H8   | 5442  | 14302 | 2978  | 28    |
| H11  | -1165 | 11473 | 3732  | 24    |
| H4A  | 3670  | 9927  | 1751  | 25    |
| H4B  | 2160  | 8459  | 1880  | 25    |
| H2   | 2145  | 11388 | 649   | 26    |
| H19  | 2525  | 12385 | -579  | 26    |
| H14  | 4795  | 7894  | 5254  | 35    |

|     |       |       |       |    |
|-----|-------|-------|-------|----|
| H9  | 2355  | 15357 | 3753  | 28 |
| H20 | 3129  | 14120 | -1681 | 29 |
| H7  | 5241  | 11854 | 2580  | 25 |
| H3  | -1236 | 10127 | 1761  | 26 |
| H13 | 2178  | 9220  | 4512  | 31 |
| H10 | -975  | 13937 | 4118  | 28 |
| H16 | 8325  | 6747  | 3157  | 27 |
| H22 | -3403 | 15611 | -1275 | 31 |

## Experimental

Single crystals of C<sub>23</sub>H<sub>20</sub>O **2a** were **growth from hexane-ethyl acetate solution**. A suitable crystal was selected and **studied** on a **Xcalibur, Eos** diffractometer. The crystal was kept at 100(2) K during data collection. Using Olex2 [1], the structure was solved with the ShelXS [2] structure solution program using Direct Methods and refined with the ShelXL [3] refinement package using Least Squares minimisation.

1. Dolomanov, O.V., Bourhis, L.J., Gildea, R.J, Howard, J.A.K. & Puschmann, H. (2009), *J. Appl. Cryst.* 42, 339-341.
2. Sheldrick, G.M. (2008). *Acta Cryst.* A64, 112-122.
3. Sheldrick, G.M. (2015). *Acta Cryst.* C71, 3-8.

## Crystal structure determination of 2a

**Crystal Data** for C<sub>23</sub>H<sub>20</sub>O (*M* = 312.39 g/mol): triclinic, space group P-1 (no. 2), *a* = 5.7804(3) Å, *b* = 8.8933(7) Å, *c* = 16.3510(11) Å,  $\alpha$  = 87.212(6)°,  $\beta$  = 84.983(5)°,  $\gamma$  = 89.862(6)°, *V* = 836.34(10) Å<sup>3</sup>, *Z* = 2, *T* = 100(2) K,  $\mu$ (MoK $\alpha$ ) = 0.074 mm<sup>-1</sup>, *D*<sub>calc</sub> = 1.240 g/cm<sup>3</sup>, 7027 reflections measured (6.626° ≤ 2 $\Theta$  ≤ 54.982°), 3839 unique (*R*<sub>int</sub> = 0.0342, *R*<sub>sigma</sub> = 0.0517) which were used in all calculations. The final *R*<sub>1</sub> was 0.0533 (*I* > 2 $\sigma$ (*I*)) and *wR*<sub>2</sub> was 0.1470 (all data).

## Refinement model description

Number of restraints - 0, number of constraints - unknown.

Details:

1. Fixed Uiso

At 1.2 times of:

All C(H) groups, All C(H,H) groups

2.a Ternary CH refined with riding coordinates:

C5(H5)

2.b Secondary CH<sub>2</sub> refined with riding coordinates:

C4(H4A,H4B)

2.c Aromatic/amide H refined with riding coordinates:

C17(H17), C23(H23), C15(H15), C21(H21), C8(H8), C11(H11), C2(H2), C19(H19), C14(H14), C9(H9), C20(H20), C7(H7), C3(H3), C13(H13), C10(H10), C16(H16), C22(H22)

## Compound 3h

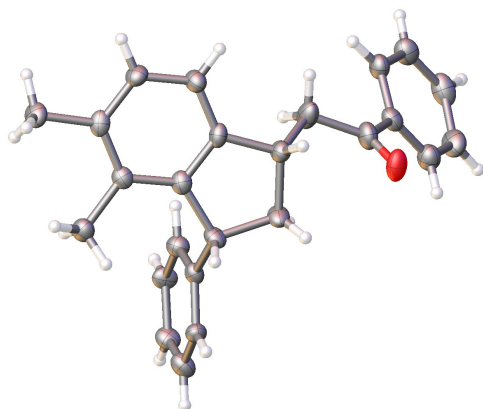

CCDC 2153106 – (3h)

### 3h

**Table S8. Crystal data and structure refinement for 3h.**

|                                             |                                                               |
|---------------------------------------------|---------------------------------------------------------------|
| Identification code                         | 3h                                                            |
| Empirical formula                           | C <sub>25</sub> H <sub>24</sub> O                             |
| Formula weight                              | 340.44                                                        |
| Temperature/K                               | 100(2)                                                        |
| Crystal system                              | monoclinic                                                    |
| Space group                                 | P2 <sub>1</sub> /n                                            |
| a/Å                                         | 9.4843(7)                                                     |
| b/Å                                         | 5.6568(6)                                                     |
| c/Å                                         | 34.252(3)                                                     |
| α/°                                         | 90                                                            |
| β/°                                         | 96.212(8)                                                     |
| γ/°                                         | 90                                                            |
| Volume/Å <sup>3</sup>                       | 1826.9(3)                                                     |
| Z                                           | 4                                                             |
| ρ <sub>calc</sub> /cm <sup>3</sup>          | 1.238                                                         |
| μ/mm <sup>-1</sup>                          | 0.562                                                         |
| F(000)                                      | 728.0                                                         |
| Crystal size/mm <sup>3</sup>                | 0.05 × 0.01 × 0.01                                            |
| Radiation                                   | CuKα (λ = 1.54184)                                            |
| 2θ range for data collection/°              | 5.19 to 140.748                                               |
| Index ranges                                | -11 ≤ h ≤ 11, -6 ≤ k ≤ 5, -35 ≤ l ≤ 41                        |
| Reflections collected                       | 9481                                                          |
| Independent reflections                     | 3436 [R <sub>int</sub> = 0.0520, R <sub>sigma</sub> = 0.0505] |
| Data/restraints/parameters                  | 3436/0/237                                                    |
| Goodness-of-fit on F <sup>2</sup>           | 1.138                                                         |
| Final R indexes [I >= 2σ (I)]               | R <sub>1</sub> = 0.1357, wR <sub>2</sub> = 0.3570             |
| Final R indexes [all data]                  | R <sub>1</sub> = 0.1501, wR <sub>2</sub> = 0.3648             |
| Largest diff. peak/hole / e Å <sup>-3</sup> | 0.78/-0.55                                                    |



**Table S9. Fractional Atomic Coordinates ( $\times 10^4$ ) and Equivalent Isotropic Displacement Parameters ( $\text{\AA}^2 \times 10^3$ ) for 3h.  $U_{\text{eq}}$  is defined as 1/3 of the trace of the orthogonalised  $U_{ij}$  tensor.**

| Atom            | <i>x</i> | <i>y</i>  | <i>z</i>   | $U(\text{eq})$ |
|-----------------|----------|-----------|------------|----------------|
| O <sub>18</sub> | 3847(6)  | -1082(10) | 7257.3(15) | 38.2(13)       |
| C <sub>10</sub> | 5367(7)  | 1599(12)  | 5866.3(17) | 22.7(14)       |
| C <sub>3</sub>  | 2444(7)  | 4581(13)  | 5626.7(18) | 24.8(14)       |
| C <sub>7</sub>  | 2271(7)  | 3456(13)  | 6305.2(18) | 25.5(14)       |
| C <sub>11</sub> | 6077(7)  | -62(13)   | 5666.8(18) | 26.2(14)       |
| C <sub>5</sub>  | 942(7)   | 6738(13)  | 6024.8(19) | 28.3(15)       |
| C <sub>14</sub> | 7470(7)  | 4026(13)  | 5936(2)    | 28.5(15)       |
| C <sub>2</sub>  | 2836(7)  | 3163(13)  | 5951.0(18) | 25.2(14)       |
| C <sub>13</sub> | 8204(7)  | 2339(14)  | 5744(2)    | 29.4(16)       |
| C <sub>21</sub> | 5178(7)  | 1902(13)  | 7614.0(19) | 27.9(15)       |
| C <sub>8</sub>  | 2818(7)  | 1643(13)  | 6609.2(18) | 26.8(15)       |
| C <sub>20</sub> | 3045(7)  | 4197(14)  | 5239.3(19) | 29.9(16)       |
| C <sub>9</sub>  | 3949(7)  | 250(14)   | 6412(2)    | 30.8(16)       |
| C <sub>6</sub>  | 1319(7)  | 5272(14)  | 6343.0(19) | 28.5(15)       |
| C <sub>15</sub> | 6052(7)  | 3651(14)  | 5993.8(19) | 28.6(15)       |
| C <sub>1</sub>  | 3858(7)  | 1090(13)  | 5973.8(18) | 25.6(15)       |
| C <sub>4</sub>  | 1480(7)  | 6404(12)  | 5664.2(18) | 24.4(14)       |
| C <sub>12</sub> | 7503(8)  | 311(15)   | 5608(2)    | 33.0(17)       |
| C <sub>19</sub> | 1039(7)  | 8044(14)  | 5325(2)    | 30.6(16)       |
| C <sub>17</sub> | 4120(8)  | 1033(14)  | 7286(2)    | 32.3(17)       |
| C <sub>22</sub> | 5032(8)  | 4095(13)  | 7787.1(19) | 30.2(16)       |
| C <sub>16</sub> | 3419(9)  | 2805(15)  | 6996(2)    | 38.6(19)       |
| C <sub>25</sub> | 7267(8)  | 1162(17)  | 8057(2)    | 41(2)          |
| C <sub>26</sub> | 6302(8)  | 449(15)   | 7746(2)    | 35.7(17)       |
| C <sub>23</sub> | 5971(8)  | 4753(15)  | 8110(2)    | 35.6(17)       |
| C <sub>24</sub> | 7089(8)  | 3296(17)  | 8242(2)    | 41(2)          |

**Table S10. Anisotropic Displacement Parameters ( $\text{\AA}^2 \times 10^3$ ) for 3h. The Anisotropic displacement factor exponent takes the form:  $-2\pi^2[\text{h}^2\text{a}^*{}^2U_{11}+2\text{hka}^*\text{b}^*U_{12}+\dots]$ .**

| Atom            | $U_{11}$ | $U_{22}$ | $U_{33}$ | $U_{23}$ | $U_{13}$ | $U_{12}$ |
|-----------------|----------|----------|----------|----------|----------|----------|
| O <sub>18</sub> | 50(3)    | 28(3)    | 34(3)    | 8(2)     | -9(2)    | -11(3)   |
| C <sub>10</sub> | 26(3)    | 25(4)    | 17(3)    | -3(3)    | 0(2)     | -5(3)    |
| C <sub>3</sub>  | 20(3)    | 31(4)    | 23(3)    | -2(3)    | -2(2)    | -5(3)    |
| C <sub>7</sub>  | 22(3)    | 28(4)    | 24(3)    | 3(3)     | -6(2)    | -2(3)    |
| C <sub>11</sub> | 30(3)    | 24(3)    | 25(3)    | -1(3)    | 3(3)     | 1(3)     |
| C <sub>5</sub>  | 21(3)    | 31(4)    | 32(3)    | 0(3)     | 0(3)     | 2(3)     |
| C <sub>14</sub> | 26(3)    | 27(4)    | 32(3)    | -9(3)    | 1(3)     | -7(3)    |
| C <sub>2</sub>  | 23(3)    | 28(4)    | 23(3)    | 1(3)     | -3(2)    | -4(3)    |
| C <sub>13</sub> | 20(3)    | 37(4)    | 31(4)    | -5(3)    | 4(3)     | -2(3)    |
| C <sub>21</sub> | 28(3)    | 32(4)    | 24(3)    | 2(3)     | 3(3)     | -2(3)    |
| C <sub>8</sub>  | 27(3)    | 29(4)    | 24(3)    | 3(3)     | -1(3)    | 3(3)     |

|                 |       |       |       |       |        |        |
|-----------------|-------|-------|-------|-------|--------|--------|
| C <sub>20</sub> | 29(3) | 34(4) | 25(3) | -1(3) | -1(3)  | 0(3)   |
| C <sub>9</sub>  | 21(3) | 40(4) | 32(4) | 9(3)  | 7(3)   | 8(3)   |
| C <sub>6</sub>  | 25(3) | 35(4) | 24(3) | 1(3)  | -1(3)  | 1(3)   |
| C <sub>15</sub> | 25(3) | 33(4) | 27(3) | -4(3) | 0(3)   | 2(3)   |
| C <sub>1</sub>  | 22(3) | 32(4) | 23(3) | -1(3) | 4(2)   | -1(3)  |
| C <sub>4</sub>  | 21(3) | 24(4) | 26(3) | 3(3)  | -7(2)  | -5(3)  |
| C <sub>12</sub> | 32(4) | 41(4) | 27(3) | -4(3) | 4(3)   | -4(3)  |
| C <sub>19</sub> | 24(3) | 35(4) | 30(3) | 4(3)  | -5(3)  | 2(3)   |
| C <sub>17</sub> | 39(4) | 32(4) | 25(3) | 6(3)  | -3(3)  | -3(3)  |
| C <sub>22</sub> | 36(4) | 29(4) | 25(3) | 1(3)  | -2(3)  | 1(3)   |
| C <sub>16</sub> | 49(5) | 35(4) | 29(4) | 7(3)  | -11(3) | 1(4)   |
| C <sub>25</sub> | 32(4) | 54(5) | 34(4) | 7(4)  | -6(3)  | 5(4)   |
| C <sub>26</sub> | 43(4) | 33(4) | 30(4) | 2(3)  | -2(3)  | 0(4)   |
| C <sub>23</sub> | 39(4) | 35(4) | 32(4) | -2(3) | -1(3)  | -7(4)  |
| C <sub>24</sub> | 35(4) | 57(6) | 29(4) | 7(4)  | -6(3)  | -18(4) |

**Table S11. Bond Lengths for 3h.**

| Atom            | Atom            | Length/Å  | Atom            | Atom            | Length/Å  |
|-----------------|-----------------|-----------|-----------------|-----------------|-----------|
| O <sub>18</sub> | C <sub>17</sub> | 1.226(9)  | C <sub>2</sub>  | C <sub>1</sub>  | 1.518(10) |
| C <sub>10</sub> | C <sub>11</sub> | 1.379(9)  | C <sub>13</sub> | C <sub>12</sub> | 1.381(10) |
| C <sub>10</sub> | C <sub>15</sub> | 1.377(10) | C <sub>21</sub> | C <sub>17</sub> | 1.506(10) |
| C <sub>10</sub> | C <sub>1</sub>  | 1.544(9)  | C <sub>21</sub> | C <sub>22</sub> | 1.388(10) |
| C <sub>3</sub>  | C <sub>2</sub>  | 1.388(9)  | C <sub>21</sub> | C <sub>26</sub> | 1.383(10) |
| C <sub>3</sub>  | C <sub>20</sub> | 1.515(9)  | C <sub>8</sub>  | C <sub>9</sub>  | 1.544(9)  |
| C <sub>3</sub>  | C <sub>4</sub>  | 1.393(10) | C <sub>8</sub>  | C <sub>16</sub> | 1.533(10) |
| C <sub>7</sub>  | C <sub>2</sub>  | 1.388(9)  | C <sub>9</sub>  | C <sub>1</sub>  | 1.567(9)  |
| C <sub>7</sub>  | C <sub>8</sub>  | 1.513(9)  | C <sub>4</sub>  | C <sub>19</sub> | 1.509(9)  |
| C <sub>7</sub>  | C <sub>6</sub>  | 1.383(10) | C <sub>17</sub> | C <sub>16</sub> | 1.514(10) |
| C <sub>11</sub> | C <sub>12</sub> | 1.405(10) | C <sub>22</sub> | C <sub>23</sub> | 1.393(10) |
| C <sub>5</sub>  | C <sub>6</sub>  | 1.385(10) | C <sub>25</sub> | C <sub>26</sub> | 1.385(10) |
| C <sub>5</sub>  | C <sub>4</sub>  | 1.400(9)  | C <sub>25</sub> | C <sub>24</sub> | 1.383(13) |
| C <sub>14</sub> | C <sub>13</sub> | 1.389(10) | C <sub>23</sub> | C <sub>24</sub> | 1.380(12) |
| C <sub>14</sub> | C <sub>15</sub> | 1.397(9)  |                 |                 |           |

**Table S12. Bond Angles for 3h.**

| Atom            | Atom            | Atom            | Angle/°  | Atom            | Atom            | Atom            | Angle/°  |
|-----------------|-----------------|-----------------|----------|-----------------|-----------------|-----------------|----------|
| C <sub>11</sub> | C <sub>10</sub> | C <sub>1</sub>  | 120.4(6) | C <sub>16</sub> | C <sub>8</sub>  | C <sub>9</sub>  | 112.7(6) |
| C <sub>15</sub> | C <sub>10</sub> | C <sub>11</sub> | 119.5(6) | C <sub>8</sub>  | C <sub>9</sub>  | C <sub>1</sub>  | 107.2(5) |
| C <sub>15</sub> | C <sub>10</sub> | C <sub>1</sub>  | 119.9(6) | C <sub>7</sub>  | C <sub>6</sub>  | C <sub>5</sub>  | 119.1(6) |
| C <sub>2</sub>  | C <sub>3</sub>  | C <sub>20</sub> | 121.6(6) | C <sub>10</sub> | C <sub>15</sub> | C <sub>14</sub> | 120.8(7) |
| C <sub>2</sub>  | C <sub>3</sub>  | C <sub>4</sub>  | 118.4(6) | C <sub>10</sub> | C <sub>1</sub>  | C <sub>9</sub>  | 109.2(5) |
| C <sub>4</sub>  | C <sub>3</sub>  | C <sub>20</sub> | 120.0(6) | C <sub>2</sub>  | C <sub>1</sub>  | C <sub>10</sub> | 116.6(6) |
| C <sub>2</sub>  | C <sub>7</sub>  | C <sub>8</sub>  | 112.6(6) | C <sub>2</sub>  | C <sub>1</sub>  | C <sub>9</sub>  | 104.6(5) |
| C <sub>6</sub>  | C <sub>7</sub>  | C <sub>2</sub>  | 119.2(6) | C <sub>3</sub>  | C <sub>4</sub>  | C <sub>5</sub>  | 119.1(6) |
| C <sub>6</sub>  | C <sub>7</sub>  | C <sub>8</sub>  | 128.2(6) | C <sub>3</sub>  | C <sub>4</sub>  | C <sub>19</sub> | 121.0(6) |
| C <sub>10</sub> | C <sub>11</sub> | C <sub>12</sub> | 119.8(7) | C <sub>5</sub>  | C <sub>4</sub>  | C <sub>19</sub> | 119.9(6) |
| C <sub>6</sub>  | C <sub>5</sub>  | C <sub>4</sub>  | 121.7(7) | C <sub>13</sub> | C <sub>12</sub> | C <sub>11</sub> | 120.8(7) |

|                 |                 |                 |          |                 |                 |                 |          |
|-----------------|-----------------|-----------------|----------|-----------------|-----------------|-----------------|----------|
| C <sub>13</sub> | C <sub>14</sub> | C <sub>15</sub> | 120.1(7) | O <sub>18</sub> | C <sub>17</sub> | C <sub>21</sub> | 119.8(7) |
| C <sub>3</sub>  | C <sub>2</sub>  | C <sub>7</sub>  | 122.4(6) | O <sub>18</sub> | C <sub>17</sub> | C <sub>16</sub> | 121.3(7) |
| C <sub>3</sub>  | C <sub>2</sub>  | C <sub>1</sub>  | 127.0(6) | C <sub>21</sub> | C <sub>17</sub> | C <sub>16</sub> | 118.9(7) |
| C <sub>7</sub>  | C <sub>2</sub>  | C <sub>1</sub>  | 110.6(6) | C <sub>21</sub> | C <sub>22</sub> | C <sub>23</sub> | 119.5(7) |
| C <sub>12</sub> | C <sub>13</sub> | C <sub>14</sub> | 118.9(6) | C <sub>17</sub> | C <sub>16</sub> | C <sub>8</sub>  | 112.3(7) |
| C <sub>22</sub> | C <sub>21</sub> | C <sub>17</sub> | 121.4(7) | C <sub>24</sub> | C <sub>25</sub> | C <sub>26</sub> | 120.2(8) |
| C <sub>26</sub> | C <sub>21</sub> | C <sub>17</sub> | 118.6(7) | C <sub>21</sub> | C <sub>26</sub> | C <sub>25</sub> | 120.0(8) |
| C <sub>26</sub> | C <sub>21</sub> | C <sub>22</sub> | 120.0(7) | C <sub>24</sub> | C <sub>23</sub> | C <sub>22</sub> | 120.3(8) |
| C <sub>7</sub>  | C <sub>8</sub>  | C <sub>9</sub>  | 104.3(5) | C <sub>23</sub> | C <sub>24</sub> | C <sub>25</sub> | 119.8(7) |
| C <sub>7</sub>  | C <sub>8</sub>  | C <sub>16</sub> | 111.8(6) |                 |                 |                 |          |

**Table S13. Hydrogen Atom Coordinates ( $\text{\AA} \times 10^4$ ) and Isotropic Displacement Parameters ( $\text{\AA}^2 \times 10^3$ ) for **3h**.**

| Atom             | <i>x</i> | <i>y</i> | <i>z</i> | U(eq) |
|------------------|----------|----------|----------|-------|
| H <sub>11</sub>  | 5602     | -1456    | 5569     | 31    |
| H <sub>5</sub>   | 301      | 8003     | 6052     | 34    |
| H <sub>14</sub>  | 7935     | 5437     | 6029     | 34    |
| H <sub>13</sub>  | 9171     | 2577     | 5706     | 35    |
| H <sub>8</sub>   | 2028     | 552      | 6660     | 32    |
| H <sub>20A</sub> | 3836     | 5290     | 5219     | 45    |
| H <sub>20B</sub> | 2304     | 4486     | 5022     | 45    |
| H <sub>20C</sub> | 3384     | 2565     | 5226     | 45    |
| H <sub>9A</sub>  | 3762     | -1469    | 6424     | 37    |
| H <sub>9B</sub>  | 4905     | 568      | 6548     | 37    |
| H <sub>6</sub>   | 929      | 5511     | 6584     | 34    |
| H <sub>15</sub>  | 5553     | 4824     | 6122     | 34    |
| H <sub>1</sub>   | 3432     | -206     | 5801     | 31    |
| H <sub>12</sub>  | 7992     | -847     | 5473     | 40    |
| H <sub>19A</sub> | 1879     | 8542     | 5204     | 46    |
| H <sub>19B</sub> | 569      | 9437     | 5422     | 46    |
| H <sub>19C</sub> | 383      | 7219     | 5131     | 46    |
| H <sub>22</sub>  | 4297     | 5139     | 7686     | 36    |
| H <sub>16A</sub> | 4122     | 4020     | 6941     | 46    |
| H <sub>16B</sub> | 2642     | 3607     | 7115     | 46    |
| H <sub>25</sub>  | 8053     | 182      | 8142     | 49    |
| H <sub>26</sub>  | 6411     | -1039    | 7625     | 43    |
| H <sub>23</sub>  | 5843     | 6211     | 8239     | 43    |
| H <sub>24</sub>  | 7734     | 3756     | 8461     | 49    |

### Experimental

Single crystals of C<sub>25</sub>H<sub>24</sub>O **3h** were grown from methanol solution. A suitable crystal was selected and studied on a SuperNova diffractometer. The crystal was kept at 100(2) K during data collection. Using Olex2 [1], the structure was solved with the ShelXT [2] structure solution program using Intrinsic Phasing and refined with the ShelXL [3] refinement package using Least Squares minimisation.

1. Dolomanov, O.V., Bourhis, L.J., Gildea, R.J., Howard, J.A.K. & Puschmann, H. (2009), *J. Appl. Cryst.* 42, 339-341.
2. Sheldrick, G.M. (2015). *Acta Cryst.* A71, 3-8.

3. Sheldrick, G.M. (2015). Acta Cryst. C71, 3-8.

### Crystal structure determination of 3h

**Crystal Data** for C<sub>25</sub>H<sub>24</sub>O (*M* = 340.44 g/mol): monoclinic, space group P2<sub>1</sub>/n (no. 14), *a* = 9.4843(7) Å, *b* = 5.6568(6) Å, *c* = 34.252(3) Å,  $\beta$  = 96.212(8)°, *V* = 1826.9(3) Å<sup>3</sup>, *Z* = 4, *T* = 100(2) K,  $\mu$ (CuK $\alpha$ ) = 0.562 mm<sup>-1</sup>, *D*<sub>calc</sub> = 1.238 g/cm<sup>3</sup>, 9481 reflections measured (5.19° ≤ 2 $\Theta$  ≤ 140.748°), 3436 unique (*R*<sub>int</sub> = 0.0520, *R*<sub>sigma</sub> = 0.0505) which were used in all calculations. The final *R*<sub>1</sub> was 0.1357 (*I* > 2 $\sigma$ (*I*)) and *wR*<sub>2</sub> was 0.3648 (all data).

### Refinement model description

Number of restraints - 0, number of constraints - unknown.

Details:

1. Fixed Uiso

At 1.2 times of:

All C(H) groups, All C(H,H) groups

At 1.5 times of:

All C(H,H,H) groups

2.a Ternary CH refined with riding coordinates:

C8(H8), C1(H1)

2.b Secondary CH<sub>2</sub> refined with riding coordinates:

C9(H9A,H9B), C16(H16A,H16B)

2.c Aromatic/amide H refined with riding coordinates:

C11(H11), C5(H5), C14(H14), C13(H13), C6(H6), C15(H15), C12(H12), C22(H22), C25(H25), C26(H26), C23(H23), C24(H24)

2.d Idealised Me refined as rotating group:

C20(H20A,H20B,H20C), C19(H19A,H19B,H19C)

## Compound 6a

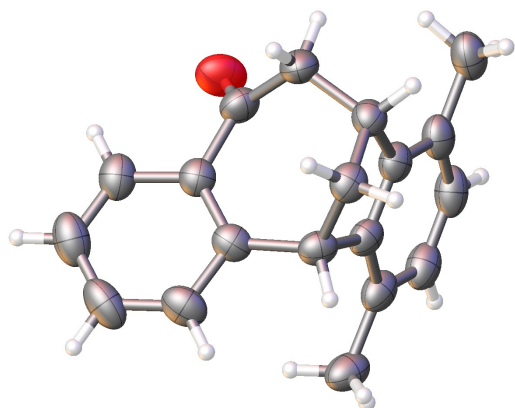

CCDC 2153107– (6a)

### 6a

**Table S14. Crystal data and structure refinement for 6a.**

|                                             |                                                               |
|---------------------------------------------|---------------------------------------------------------------|
| Identification code                         | 6a                                                            |
| Empirical formula                           | C <sub>19</sub> H <sub>18</sub> O                             |
| Formula weight                              | 262.33                                                        |
| Temperature/K                               | 100(2)                                                        |
| Crystal system                              | monoclinic                                                    |
| Space group                                 | P2 <sub>1</sub> /c                                            |
| a/Å                                         | 7.8475(4)                                                     |
| b/Å                                         | 16.8287(7)                                                    |
| c/Å                                         | 11.1852(5)                                                    |
| α/°                                         | 90                                                            |
| β/°                                         | 106.026(5)                                                    |
| γ/°                                         | 90                                                            |
| Volume/Å <sup>3</sup>                       | 1419.75(12)                                                   |
| Z                                           | 4                                                             |
| ρ <sub>calc</sub> /g/cm <sup>3</sup>        | 1.227                                                         |
| μ/mm <sup>-1</sup>                          | 0.570                                                         |
| F(000)                                      | 560.0                                                         |
| Crystal size/mm <sup>3</sup>                | 0.35 × 0.22 × 0.1                                             |
| Radiation                                   | CuKα (λ = 1.54184)                                            |
| 2θ range for data collection/°              | 9.762 to 144.172                                              |
| Index ranges                                | -9 ≤ h ≤ 9, -20 ≤ k ≤ 20, -13 ≤ l ≤ 13                        |
| Reflections collected                       | 9098                                                          |
| Independent reflections                     | 2769 [R <sub>int</sub> = 0.0323, R <sub>sigma</sub> = 0.0297] |
| Data/restraints/parameters                  | 2769/0/183                                                    |
| Goodness-of-fit on F <sup>2</sup>           | 1.062                                                         |
| Final R indexes [I ≥ 2σ (I)]                | R <sub>1</sub> = 0.0684, wR <sub>2</sub> = 0.1852             |
| Final R indexes [all data]                  | R <sub>1</sub> = 0.0815, wR <sub>2</sub> = 0.2033             |
| Largest diff. peak/hole / e Å <sup>-3</sup> | 0.34/-0.28                                                    |

**Table S15. Fractional Atomic Coordinates ( $\times 10^4$ ) and Equivalent Isotropic Displacement Parameters ( $\text{\AA}^2 \times 10^3$ ) for 6a.  $U_{\text{eq}}$  is defined as 1/3 of the trace of the orthogonalised  $U_{11}$  tensor.**

| Atom            | x       | y          | z       | U(eq)   |
|-----------------|---------|------------|---------|---------|
| O <sub>1</sub>  | 3342(3) | 3120.8(15) | 5568(2) | 69.2(6) |
| C <sub>5</sub>  | 7028(3) | 1508.7(14) | 5812(2) | 41.5(6) |
| C <sub>6</sub>  | 5318(3) | 1301.0(13) | 5122(2) | 42.8(6) |
| C <sub>2</sub>  | 6216(3) | 3315.2(15) | 5385(2) | 42.8(6) |
| C <sub>4</sub>  | 7874(3) | 2051.4(15) | 5062(2) | 42.6(6) |
| C <sub>7</sub>  | 4917(3) | 1685.1(15) | 3847(2) | 44.4(6) |
| C <sub>13</sub> | 6767(3) | 1867.5(15) | 3722(2) | 46.0(6) |
| C <sub>3</sub>  | 7805(3) | 2915.6(15) | 5436(2) | 42.9(6) |
| C <sub>14</sub> | 7746(4) | 1254.6(14) | 7037(2) | 47.8(6) |
| C <sub>17</sub> | 4237(4) | 836.9(14)  | 5644(3) | 49.5(6) |
| C <sub>1</sub>  | 4397(3) | 2953.7(15) | 4975(2) | 48.0(6) |
| C <sub>15</sub> | 6673(4) | 780.0(15)  | 7539(2) | 53.6(7) |
| C <sub>8</sub>  | 3803(3) | 2443.3(16) | 3821(2) | 50.2(6) |
| C <sub>9</sub>  | 6260(4) | 4111.7(16) | 5763(2) | 52.3(7) |
| C <sub>12</sub> | 9390(4) | 3336.4(18) | 5898(2) | 54.6(7) |
| C <sub>16</sub> | 4970(4) | 583.1(15)  | 6871(2) | 54.2(7) |
| C <sub>18</sub> | 9594(4) | 1484.0(18) | 7759(2) | 58.1(7) |
| C <sub>19</sub> | 2379(4) | 620.8(17)  | 4922(3) | 60.8(7) |
| C <sub>11</sub> | 9393(4) | 4131.9(19) | 6246(3) | 63.6(8) |
| C <sub>10</sub> | 7834(5) | 4519.3(17) | 6173(3) | 62.6(8) |

**Table S16. Anisotropic Displacement Parameters ( $\text{\AA}^2 \times 10^3$ ) for 6a. The Anisotropic displacement factor exponent takes the form:  $-2\pi^2 [h^2 a^{*2} U_{11} + 2hka^* b^* U_{12} + \dots]$ .**

| Atom            | $U_{11}$ | $U_{22}$ | $U_{33}$ | $U_{23}$  | $U_{13}$ | $U_{12}$  |
|-----------------|----------|----------|----------|-----------|----------|-----------|
| O <sub>1</sub>  | 48.8(11) | 89.2(16) | 74.2(14) | -15.2(12) | 24.5(10) | 4.5(10)   |
| C <sub>5</sub>  | 48.4(13) | 39.3(12) | 38.4(11) | -2.0(9)   | 14.8(10) | 9.7(10)   |
| C <sub>6</sub>  | 53.1(14) | 37.4(12) | 41.6(12) | -4.2(9)   | 19.4(11) | 3.3(10)   |
| C <sub>2</sub>  | 48.4(13) | 44.6(13) | 37.6(11) | 0.3(9)    | 15.7(10) | 0.4(10)   |
| C <sub>4</sub>  | 38.5(12) | 51.2(14) | 40.1(12) | 0(1)      | 14.2(10) | 5.7(10)   |
| C <sub>7</sub>  | 48.2(13) | 42.4(12) | 40.8(12) | -3.5(10)  | 9.1(10)  | -0.4(10)  |
| C <sub>13</sub> | 55.2(14) | 48.0(13) | 37.7(12) | -2.4(10)  | 17.5(11) | 3.8(11)   |
| C <sub>3</sub>  | 43.4(12) | 53.3(14) | 35.8(11) | -1.7(10)  | 17.1(9)  | -4.6(10)  |
| C <sub>14</sub> | 63.1(16) | 42.6(13) | 38.6(12) | -2.4(10)  | 15.6(11) | 12.6(11)  |
| C <sub>17</sub> | 62.0(16) | 37.7(12) | 54.7(14) | -8.8(10)  | 26.0(12) | -2.8(11)  |
| C <sub>1</sub>  | 41.5(12) | 50.2(14) | 53.0(14) | 0.4(11)   | 13.9(11) | 9.3(11)   |
| C <sub>15</sub> | 80(2)    | 41.2(13) | 41.4(13) | -0.4(10)  | 20.5(13) | 8.5(12)   |
| C <sub>8</sub>  | 44.0(13) | 49.3(14) | 51.2(14) | 1.9(11)   | 3.2(11)  | 5.0(11)   |
| C <sub>9</sub>  | 71.0(18) | 45.4(14) | 45.5(13) | -0.7(11)  | 24.9(12) | 0.0(12)   |
| C <sub>12</sub> | 47.0(14) | 70.5(18) | 50.6(14) | -2.2(12)  | 20.5(12) | -12.8(12) |
| C <sub>16</sub> | 82.2(19) | 37.3(12) | 55.0(15) | -2.8(11)  | 39.0(14) | -2.7(13)  |
| C <sub>18</sub> | 59.7(17) | 65.1(17) | 44.9(14) | -2.8(12)  | 6.7(12)  | 18.9(14)  |
| C <sub>19</sub> | 66.8(18) | 47.5(15) | 74.5(19) | -13.9(13) | 30.4(15) | -8.9(13)  |
| C <sub>11</sub> | 75(2)    | 66.2(18) | 54.1(16) | -11.9(13) | 25.4(15) | -31.9(16) |
| C <sub>10</sub> | 89(2)    | 50.8(15) | 58.0(16) | -9.3(13)  | 36.9(16) | -18.4(15) |

**Table S17. Bond Lengths for 6a.**

| Atom           | Atom            | Length/Å | Atom            | Atom            | Length/Å |
|----------------|-----------------|----------|-----------------|-----------------|----------|
| O <sub>1</sub> | C <sub>1</sub>  | 1.228(3) | C <sub>7</sub>  | C <sub>8</sub>  | 1.542(3) |
| C <sub>5</sub> | C <sub>6</sub>  | 1.395(3) | C <sub>3</sub>  | C <sub>12</sub> | 1.400(4) |
| C <sub>5</sub> | C <sub>4</sub>  | 1.512(3) | C <sub>14</sub> | C <sub>15</sub> | 1.386(4) |
| C <sub>5</sub> | C <sub>14</sub> | 1.397(3) | C <sub>14</sub> | C <sub>18</sub> | 1.503(4) |
| C <sub>6</sub> | C <sub>7</sub>  | 1.517(3) | C <sub>17</sub> | C <sub>16</sub> | 1.400(4) |
| C <sub>6</sub> | C <sub>17</sub> | 1.394(4) | C <sub>17</sub> | C <sub>19</sub> | 1.503(4) |
| C <sub>2</sub> | C <sub>3</sub>  | 1.405(3) | C <sub>1</sub>  | C <sub>8</sub>  | 1.513(4) |
| C <sub>2</sub> | C <sub>1</sub>  | 1.502(4) | C <sub>15</sub> | C <sub>16</sub> | 1.380(4) |
| C <sub>2</sub> | C <sub>9</sub>  | 1.403(4) | C <sub>9</sub>  | C <sub>10</sub> | 1.376(4) |
| C <sub>4</sub> | C <sub>13</sub> | 1.542(3) | C <sub>12</sub> | C <sub>11</sub> | 1.394(4) |
| C <sub>4</sub> | C <sub>3</sub>  | 1.518(3) | C <sub>11</sub> | C <sub>10</sub> | 1.369(5) |
| C <sub>7</sub> | C <sub>13</sub> | 1.527(4) |                 |                 |          |

**Table S18. Bond Angles for 6a.**

| Atom            | Atom            | Atom            | Angle/°    | Atom            | Atom            | Atom            | Angle/°  |
|-----------------|-----------------|-----------------|------------|-----------------|-----------------|-----------------|----------|
| C <sub>6</sub>  | C <sub>5</sub>  | C <sub>4</sub>  | 110.3(2)   | C <sub>12</sub> | C <sub>3</sub>  | C <sub>4</sub>  | 119.4(2) |
| C <sub>6</sub>  | C <sub>5</sub>  | C <sub>14</sub> | 122.1(2)   | C <sub>5</sub>  | C <sub>14</sub> | C <sub>18</sub> | 121.1(2) |
| C <sub>14</sub> | C <sub>5</sub>  | C <sub>4</sub>  | 127.5(2)   | C <sub>15</sub> | C <sub>14</sub> | C <sub>5</sub>  | 116.6(3) |
| C <sub>5</sub>  | C <sub>6</sub>  | C <sub>7</sub>  | 109.4(2)   | C <sub>15</sub> | C <sub>14</sub> | C <sub>18</sub> | 122.3(2) |
| C <sub>17</sub> | C <sub>6</sub>  | C <sub>5</sub>  | 120.8(2)   | C <sub>6</sub>  | C <sub>17</sub> | C <sub>16</sub> | 116.6(3) |
| C <sub>17</sub> | C <sub>6</sub>  | C <sub>7</sub>  | 129.8(2)   | C <sub>6</sub>  | C <sub>17</sub> | C <sub>19</sub> | 121.5(3) |
| C <sub>3</sub>  | C <sub>2</sub>  | C <sub>1</sub>  | 125.2(2)   | C <sub>16</sub> | C <sub>17</sub> | C <sub>19</sub> | 121.9(3) |
| C <sub>9</sub>  | C <sub>2</sub>  | C <sub>3</sub>  | 119.8(2)   | O <sub>1</sub>  | C <sub>1</sub>  | C <sub>2</sub>  | 117.9(2) |
| C <sub>9</sub>  | C <sub>2</sub>  | C <sub>1</sub>  | 114.9(2)   | O <sub>1</sub>  | C <sub>1</sub>  | C <sub>8</sub>  | 119.8(2) |
| C <sub>5</sub>  | C <sub>4</sub>  | C <sub>13</sub> | 101.64(19) | C <sub>2</sub>  | C <sub>1</sub>  | C <sub>8</sub>  | 122.2(2) |
| C <sub>5</sub>  | C <sub>4</sub>  | C <sub>3</sub>  | 111.80(19) | C <sub>16</sub> | C <sub>15</sub> | C <sub>14</sub> | 121.7(2) |
| C <sub>3</sub>  | C <sub>4</sub>  | C <sub>13</sub> | 114.0(2)   | C <sub>1</sub>  | C <sub>8</sub>  | C <sub>7</sub>  | 114.4(2) |
| C <sub>6</sub>  | C <sub>7</sub>  | C <sub>13</sub> | 102.44(19) | C <sub>10</sub> | C <sub>9</sub>  | C <sub>2</sub>  | 121.5(3) |
| C <sub>6</sub>  | C <sub>7</sub>  | C <sub>8</sub>  | 109.9(2)   | C <sub>11</sub> | C <sub>12</sub> | C <sub>3</sub>  | 121.5(3) |
| C <sub>13</sub> | C <sub>7</sub>  | C <sub>8</sub>  | 112.3(2)   | C <sub>15</sub> | C <sub>16</sub> | C <sub>17</sub> | 122.1(3) |
| C <sub>7</sub>  | C <sub>13</sub> | C <sub>4</sub>  | 104.27(19) | C <sub>10</sub> | C <sub>11</sub> | C <sub>12</sub> | 120.5(3) |
| C <sub>2</sub>  | C <sub>3</sub>  | C <sub>4</sub>  | 123.1(2)   | C <sub>11</sub> | C <sub>10</sub> | C <sub>9</sub>  | 119.2(3) |
| C <sub>12</sub> | C <sub>3</sub>  | C <sub>2</sub>  | 117.5(2)   |                 |                 |                 |          |

**Table S19. Hydrogen Atom Coordinates (Å×10<sup>4</sup>) and Isotropic Displacement Parameters (Å<sup>2</sup>×10<sup>3</sup>) for 6a.**

| Atom             | x    | y    | z    | U(eq) |
|------------------|------|------|------|-------|
| H <sub>4</sub>   | 9134 | 1889 | 5172 | 51    |
| H <sub>7</sub>   | 4284 | 1304 | 3187 | 53    |
| H <sub>13A</sub> | 6738 | 2330 | 3171 | 55    |
| H <sub>13B</sub> | 7257 | 1405 | 3383 | 55    |
| H <sub>15</sub>  | 7123 | 585  | 8363 | 64    |
| H <sub>8A</sub>  | 3849 | 2766 | 3090 | 60    |
| H <sub>8B</sub>  | 2552 | 2287 | 3708 | 60    |
| H <sub>9</sub>   | 5179 | 4376 | 5735 | 63    |

|                  |       |      |      |    |
|------------------|-------|------|------|----|
| H <sub>12</sub>  | 10487 | 3074 | 5977 | 66 |
| H <sub>16</sub>  | 4272  | 265  | 7256 | 65 |
| H <sub>18A</sub> | 10427 | 1335 | 7287 | 87 |
| H <sub>18B</sub> | 9911  | 1207 | 8561 | 87 |
| H <sub>18C</sub> | 9649  | 2059 | 7900 | 87 |
| H <sub>19A</sub> | 1698  | 1106 | 4638 | 91 |
| H <sub>19B</sub> | 1814  | 318  | 5456 | 91 |
| H <sub>19C</sub> | 2414  | 297  | 4200 | 91 |
| H <sub>11</sub>  | 10486 | 4408 | 6535 | 76 |
| H <sub>10</sub>  | 7838  | 5063 | 6403 | 75 |

## Experimental

Single crystals of C<sub>19</sub>H<sub>18</sub>O **6a** were grown from methanol solution. A suitable crystal was selected and studied on a SuperNova diffractometer. The crystal was kept at 100(2) K during data collection. Using Olex2 [1], the structure was solved with the ShelXT [2] structure solution program using Intrinsic Phasing and refined with the ShelXL [3] refinement package using Least Squares minimisation.

1. Dolomanov, O.V., Bourhis, L.J., Gildea, R.J., Howard, J.A.K. & Puschmann, H. (2009), *J. Appl. Cryst.* 42, 339-341.
2. Sheldrick, G.M. (2015). *Acta Cryst.* A71, 3-8.
3. Sheldrick, G.M. (2015). *Acta Cryst.* C71, 3-8.

## Crystal structure determination of 6a

**Crystal Data** for C<sub>19</sub>H<sub>18</sub>O (*M* = 262.33 g/mol): monoclinic, space group P2<sub>1</sub>/c (no. 14), *a* = 7.8475(4) Å, *b* = 16.8287(7) Å, *c* = 11.1852(5) Å,  $\beta$  = 106.026(5)°, *V* = 1419.75(12) Å<sup>3</sup>, *Z* = 4, *T* = 100(2) K,  $\mu$ (CuK $\alpha$ ) = 0.570 mm<sup>-1</sup>, *D*<sub>calc</sub> = 1.227 g/cm<sup>3</sup>, 9098 reflections measured (9.762° ≤ 2 $\Theta$  ≤ 144.172°), 2769 unique (*R*<sub>int</sub> = 0.0323, *R*<sub>sigma</sub> = 0.0297) which were used in all calculations. The final *R*<sub>1</sub> was 0.0684 (*I* > 2 $\sigma$ (*I*)) and *wR*<sub>2</sub> was 0.2033 (all data).

## Refinement model description

Number of restraints - 0, number of constraints - unknown.

Details:

1. Fixed Uiso

At 1.2 times of:

All C(H) groups, All C(H,H) groups

At 1.5 times of:

All C(H,H,H) groups

2.a Ternary CH refined with riding coordinates:

C4(H4), C7(H7)

2.b Secondary CH<sub>2</sub> refined with riding coordinates:

C13(H13A,H13B), C8(H8A,H8B)

2.c Aromatic/amide H refined with riding coordinates:

C15(H15), C9(H9), C12(H12), C16(H16), C11(H11), C10(H10)

2.d Idealised Me refined as rotating group:

C18(H18A,H18B,H18C), C19(H19A,H19B,H19C)



IV. Details of DFT calculations of cations A-D, intermediate  $\pi$ - and  $\sigma$ -complexes leading to indanes *cis*-/*trans*-3a, and indanes *cis*-/*trans*-3a

1a

Energy E(B3LYP) = -731.673194625 h, G<sup>298</sup> = -731.461392 h,  $\mu$ =5.16 D

Cartesian coordinates, Å

| N  | atom | x         | y         | z         |
|----|------|-----------|-----------|-----------|
| 1  | C    | 6.139900  | 1.138180  | 0.034687  |
| 2  | C    | 6.055274  | -0.224661 | 0.317025  |
| 3  | C    | 4.824950  | -0.864627 | 0.285225  |
| 4  | C    | 3.655380  | -0.153740 | -0.014284 |
| 5  | C    | 3.751819  | 1.215403  | -0.291600 |
| 6  | C    | 4.987427  | 1.853992  | -0.274164 |
| 7  | C    | 2.357564  | -0.903911 | -0.047041 |
| 8  | O    | 2.367385  | -2.135172 | -0.104991 |
| 9  | C    | 1.099011  | -0.145870 | 0.009518  |
| 10 | C    | -0.102438 | -0.759961 | -0.062573 |
| 11 | C    | -1.367284 | -0.085902 | 0.005315  |
| 12 | C    | -2.542110 | -0.749043 | -0.072784 |
| 13 | C    | -3.886233 | -0.186733 | -0.014214 |
| 14 | C    | -4.983740 | -1.055323 | -0.131831 |
| 15 | C    | -6.286974 | -0.576082 | -0.083932 |
| 16 | C    | -6.522084 | 0.785201  | 0.084096  |
| 17 | C    | -5.443340 | 1.662409  | 0.204037  |
| 18 | C    | -4.142431 | 1.185518  | 0.155928  |
| 19 | H    | -4.805490 | -2.114673 | -0.262001 |
| 20 | H    | -3.322806 | 1.883085  | 0.252694  |
| 21 | H    | -7.116541 | -1.263252 | -0.177199 |
| 22 | H    | -5.620750 | 2.720904  | 0.335792  |
| 23 | H    | -7.534665 | 1.162233  | 0.122028  |
| 24 | H    | -2.500008 | -1.826604 | -0.193413 |
| 25 | H    | -1.347772 | 0.990824  | 0.123035  |
| 26 | H    | -0.117757 | -1.838129 | -0.178681 |
| 27 | H    | 1.139661  | 0.926381  | 0.131086  |
| 28 | H    | 4.750135  | -1.921312 | 0.495679  |
| 29 | H    | 2.873178  | 1.789865  | -0.542923 |
| 30 | H    | 6.948242  | -0.783857 | 0.559994  |
| 31 | H    | 5.048612  | 2.909114  | -0.501608 |
| 32 | H    | 7.098735  | 1.637691  | 0.055007  |

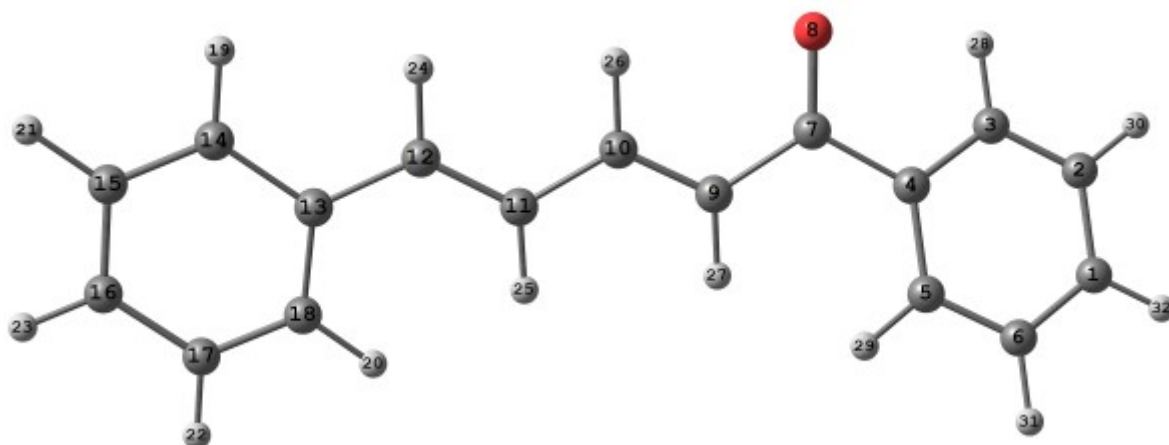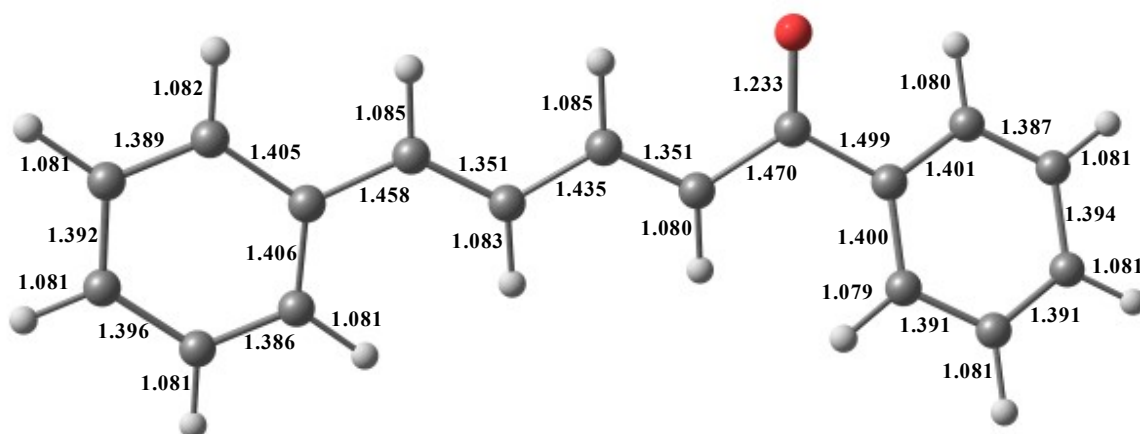

### Summary of Natural Population Analysis:

#### Natural Population

| Atom No | Natural Charge | Core    | Valence | Rydberg | Total   |
|---------|----------------|---------|---------|---------|---------|
| C 1     | -0.18537       | 1.99915 | 4.16581 | 0.02041 | 6.18537 |
| C 2     | -0.21341       | 1.99915 | 4.19410 | 0.02015 | 6.21341 |
| C 3     | -0.16951       | 1.99907 | 4.15007 | 0.02037 | 6.16951 |
| C 4     | -0.14171       | 1.99893 | 4.12230 | 0.02048 | 6.14171 |
| C 5     | -0.17863       | 1.99908 | 4.16154 | 0.01802 | 6.17863 |
| C 6     | -0.21477       | 1.99916 | 4.19519 | 0.02041 | 6.21477 |
| C 7     | 0.52245        | 1.99917 | 3.44443 | 0.03396 | 5.47755 |

|   |    |          |         |         |         |         |
|---|----|----------|---------|---------|---------|---------|
| O | 8  | -0.65862 | 1.99977 | 6.63576 | 0.02309 | 8.65862 |
| C | 9  | -0.31051 | 1.99900 | 4.29256 | 0.01895 | 6.31051 |
| C | 10 | -0.10955 | 1.99908 | 4.09094 | 0.01953 | 6.10955 |
| C | 11 | -0.22830 | 1.99905 | 4.21161 | 0.01763 | 6.22830 |
| C | 12 | -0.12726 | 1.99906 | 4.10957 | 0.01862 | 6.12726 |
| C | 13 | -0.11099 | 1.99903 | 4.09192 | 0.02004 | 6.11099 |
| C | 14 | -0.16742 | 1.99891 | 4.14864 | 0.01987 | 6.16742 |
| C | 15 | -0.22029 | 1.99917 | 4.19987 | 0.02125 | 6.22029 |
| C | 16 | -0.19821 | 1.99916 | 4.17949 | 0.01956 | 6.19821 |
| C | 17 | -0.21599 | 1.99918 | 4.19566 | 0.02115 | 6.21599 |
| C | 18 | -0.17190 | 1.99892 | 4.15428 | 0.01871 | 6.17190 |
| H | 19 | 0.22113  | 0.00000 | 0.77719 | 0.00168 | 0.77887 |
| H | 20 | 0.21957  | 0.00000 | 0.77873 | 0.00170 | 0.78043 |
| H | 21 | 0.22344  | 0.00000 | 0.77491 | 0.00165 | 0.77656 |
| H | 22 | 0.22285  | 0.00000 | 0.77551 | 0.00164 | 0.77715 |
| H | 23 | 0.22218  | 0.00000 | 0.77624 | 0.00158 | 0.77782 |
| H | 24 | 0.21435  | 0.00000 | 0.78307 | 0.00258 | 0.78565 |
| H | 25 | 0.21429  | 0.00000 | 0.78286 | 0.00285 | 0.78571 |
| H | 26 | 0.21859  | 0.00000 | 0.77721 | 0.00420 | 0.78141 |
| H | 27 | 0.21671  | 0.00000 | 0.78053 | 0.00275 | 0.78329 |
| H | 28 | 0.23043  | 0.00000 | 0.76720 | 0.00237 | 0.76957 |
| H | 29 | 0.22447  | 0.00000 | 0.77385 | 0.00168 | 0.77553 |
| H | 30 | 0.22389  | 0.00000 | 0.77445 | 0.00166 | 0.77611 |
| H | 31 | 0.22457  | 0.00000 | 0.77378 | 0.00164 | 0.77543 |
| H | 32 | 0.22353  | 0.00000 | 0.77494 | 0.00153 | 0.77647 |

---

\* Total \*    0.00000    35.98404    87.61423    0.40172    124.00000

**A1**

**Energy E(B3LYP) = -732.099946379 h, G<sup>298</sup> = -731.873839 h,  $\mu=3.87$  D**

**Cartesian coordinates, Å**

| N  | atom | x         | y         | z         |
|----|------|-----------|-----------|-----------|
| 1  | C    | 6.102301  | 1.077353  | 0.054365  |
| 2  | C    | 5.950495  | -0.229701 | 0.504896  |
| 3  | C    | 4.706608  | -0.833323 | 0.464575  |
| 4  | C    | 3.599646  | -0.122900 | -0.016106 |
| 5  | C    | 3.757443  | 1.196357  | -0.456787 |
| 6  | C    | 5.008011  | 1.786812  | -0.428861 |
| 7  | C    | 2.288030  | -0.757360 | -0.062868 |
| 8  | O    | 2.207782  | -2.060532 | -0.164124 |
| 9  | C    | 1.091716  | -0.036390 | 0.024940  |
| 10 | C    | -0.127352 | -0.657464 | -0.092614 |
| 11 | C    | -1.365841 | 0.012673  | 0.017358  |
| 12 | C    | -2.523463 | -0.685233 | -0.117518 |
| 13 | C    | -3.871408 | -0.166581 | -0.027315 |
| 14 | C    | -4.937494 | -1.060110 | -0.197121 |
| 15 | C    | -6.248029 | -0.618097 | -0.118755 |
| 16 | C    | -6.508712 | 0.723898  | 0.130462  |
| 17 | C    | -5.457813 | 1.623660  | 0.301896  |
| 18 | C    | -4.149281 | 1.186046  | 0.224538  |
| 19 | H    | -4.726520 | -2.103676 | -0.390717 |

|    |   |           |           |           |
|----|---|-----------|-----------|-----------|
| 20 | H | -3.344326 | 1.893840  | 0.360675  |
| 21 | H | -7.062179 | -1.315816 | -0.251309 |
| 22 | H | -5.665867 | 2.666103  | 0.496231  |
| 23 | H | -7.529961 | 1.073125  | 0.192105  |
| 24 | H | -2.442688 | -1.750128 | -0.312686 |
| 25 | H | -1.361409 | 1.076905  | 0.210918  |
| 26 | H | -0.150068 | -1.724748 | -0.282659 |
| 27 | H | 1.148591  | 1.024200  | 0.211666  |
| 28 | H | 4.596756  | -1.837209 | 0.853637  |
| 29 | H | 2.913852  | 1.742925  | -0.852360 |
| 30 | H | 6.798984  | -0.773472 | 0.893258  |
| 31 | H | 5.131302  | 2.798320  | -0.786833 |
| 32 | H | 7.076422  | 1.544870  | 0.082716  |
| 33 | H | 3.065722  | -2.468829 | -0.342161 |

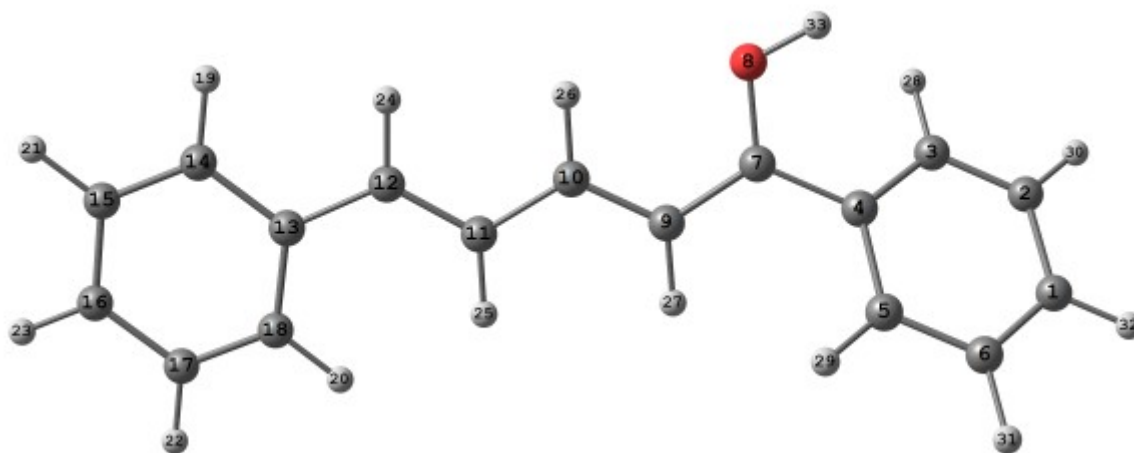

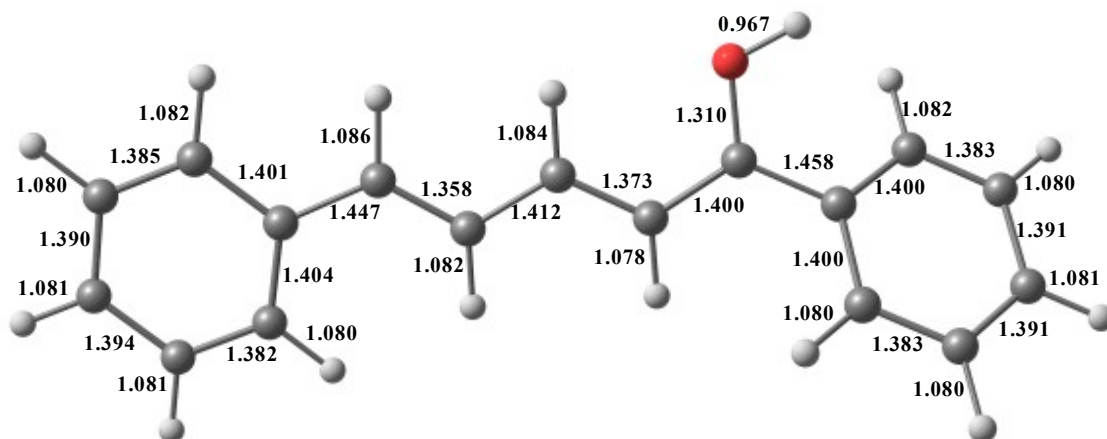

### Summary of Natural Population Analysis:

#### Natural Population

| Atom No | Natural Charge | Core    | Valence | Rydberg | Total   |
|---------|----------------|---------|---------|---------|---------|
| C 1     | -0.15715       | 1.99916 | 4.13802 | 0.01997 | 6.15715 |
| C 2     | -0.20255       | 1.99915 | 4.18293 | 0.02047 | 6.20255 |
| C 3     | -0.16842       | 1.99906 | 4.14976 | 0.01960 | 6.16842 |
| C 4     | -0.15086       | 1.99892 | 4.13329 | 0.01864 | 6.15086 |
| C 5     | -0.14378       | 1.99907 | 4.12662 | 0.01809 | 6.14378 |
| C 6     | -0.20542       | 1.99915 | 4.18606 | 0.02021 | 6.20542 |
| C 7     | 0.51856        | 1.99893 | 3.45434 | 0.02817 | 5.48144 |
| O 8     | -0.62546       | 1.99970 | 6.60124 | 0.02452 | 8.62546 |
| C 9     | -0.34880       | 1.99907 | 4.31850 | 0.03123 | 6.34880 |
| C 10    | 0.05053        | 1.99914 | 3.93535 | 0.01497 | 5.94947 |
| C 11    | -0.27871       | 1.99913 | 4.25011 | 0.02948 | 6.27871 |
| C 12    | -0.05354       | 1.99908 | 4.03159 | 0.02287 | 6.05354 |
| C 13    | -0.12563       | 1.99900 | 4.10693 | 0.01970 | 6.12563 |
| C 14    | -0.15047       | 1.99908 | 4.13245 | 0.01893 | 6.15047 |
| C 15    | -0.21127       | 1.99915 | 4.19185 | 0.02028 | 6.21127 |
| C 16    | -0.15580       | 1.99916 | 4.13655 | 0.02009 | 6.15580 |
| C 17    | -0.20587       | 1.99916 | 4.18654 | 0.02017 | 6.20587 |
| C 18    | -0.15841       | 1.99906 | 4.14147 | 0.01787 | 6.15841 |
| H 19    | 0.22866        | 0.00000 | 0.76958 | 0.00176 | 0.77134 |
| H 20    | 0.22646        | 0.00000 | 0.77177 | 0.00177 | 0.77354 |
| H 21    | 0.22819        | 0.00000 | 0.77015 | 0.00166 | 0.77181 |

|   |    |         |         |         |         |         |
|---|----|---------|---------|---------|---------|---------|
| H | 22 | 0.22757 | 0.00000 | 0.77078 | 0.00165 | 0.77243 |
| H | 23 | 0.22507 | 0.00000 | 0.77345 | 0.00148 | 0.77493 |
| H | 24 | 0.22930 | 0.00000 | 0.76875 | 0.00195 | 0.77070 |
| H | 25 | 0.23149 | 0.00000 | 0.76567 | 0.00284 | 0.76851 |
| H | 26 | 0.22560 | 0.00000 | 0.76973 | 0.00466 | 0.77440 |
| H | 27 | 0.24607 | 0.00000 | 0.75136 | 0.00257 | 0.75393 |
| H | 28 | 0.23293 | 0.00000 | 0.76480 | 0.00227 | 0.76707 |
| H | 29 | 0.23487 | 0.00000 | 0.76333 | 0.00180 | 0.76513 |
| H | 30 | 0.23412 | 0.00000 | 0.76428 | 0.00160 | 0.76588 |
| H | 31 | 0.23343 | 0.00000 | 0.76498 | 0.00159 | 0.76657 |
| H | 32 | 0.23111 | 0.00000 | 0.76744 | 0.00145 | 0.76889 |
| H | 33 | 0.53860 | 0.00000 | 0.45869 | 0.00270 | 0.46140 |

---

\* Total \*    1.00044    35.98417    87.59838    0.41701    123.99956

**C1**

**Energy E(B3LYP) = -732.482018588 h, G<sup>298</sup> = -732.243737 h,  $\mu$ =2.84 D**

**Cartesian coordinates, Å**

| N  | atom | x         | y         | z         |
|----|------|-----------|-----------|-----------|
| 1  | C    | 6.260175  | 0.727049  | 0.042168  |
| 2  | C    | 5.945396  | -0.544511 | 0.527831  |
| 3  | C    | 4.635089  | -0.971170 | 0.536243  |
| 4  | C    | 3.608088  | -0.126554 | 0.052211  |
| 5  | C    | 3.946294  | 1.156602  | -0.435433 |
| 6  | C    | 5.261922  | 1.574498  | -0.436300 |
| 7  | C    | 2.244598  | -0.547496 | 0.050775  |
| 8  | O    | 1.857363  | -1.702638 | 0.476245  |
| 9  | C    | 1.114631  | 0.313704  | -0.424454 |
| 10 | C    | -0.194292 | -0.383890 | -0.569618 |
| 11 | C    | -1.376504 | 0.156653  | -0.188131 |
| 12 | C    | -2.571660 | -0.548558 | -0.446677 |
| 13 | C    | -3.881748 | -0.149205 | -0.143554 |
| 14 | C    | -4.943253 | -1.026915 | -0.499828 |
| 15 | C    | -6.250246 | -0.685127 | -0.231347 |
| 16 | C    | -6.526230 | 0.532900  | 0.395381  |
| 17 | C    | -5.498240 | 1.414053  | 0.757025  |
| 18 | C    | -4.189091 | 1.085120  | 0.494248  |
| 19 | H    | -4.708691 | -1.964525 | -0.983398 |
| 20 | H    | -3.400145 | 1.766687  | 0.771771  |
| 21 | H    | -7.056277 | -1.350337 | -0.501849 |
| 22 | H    | -5.737367 | 2.349454  | 1.240182  |
| 23 | H    | -7.551956 | 0.801965  | 0.605486  |
| 24 | H    | -2.463250 | -1.508514 | -0.938280 |
| 25 | H    | -1.399341 | 1.117910  | 0.304194  |
| 26 | H    | -0.189039 | -1.351697 | -1.055321 |
| 27 | H    | 1.038055  | 1.176876  | 0.240001  |
| 28 | H    | 4.428239  | -1.959857 | 0.921994  |
| 29 | H    | 3.185687  | 1.822409  | -0.810908 |
| 30 | H    | 6.725241  | -1.193358 | 0.896394  |
| 31 | H    | 5.514284  | 2.555405  | -0.809550 |
| 32 | H    | 7.289546  | 1.056084  | 0.037405  |

33 H 2.572781 -2.276557 0.796482  
 34 H 1.383759 0.716249 -1.407795

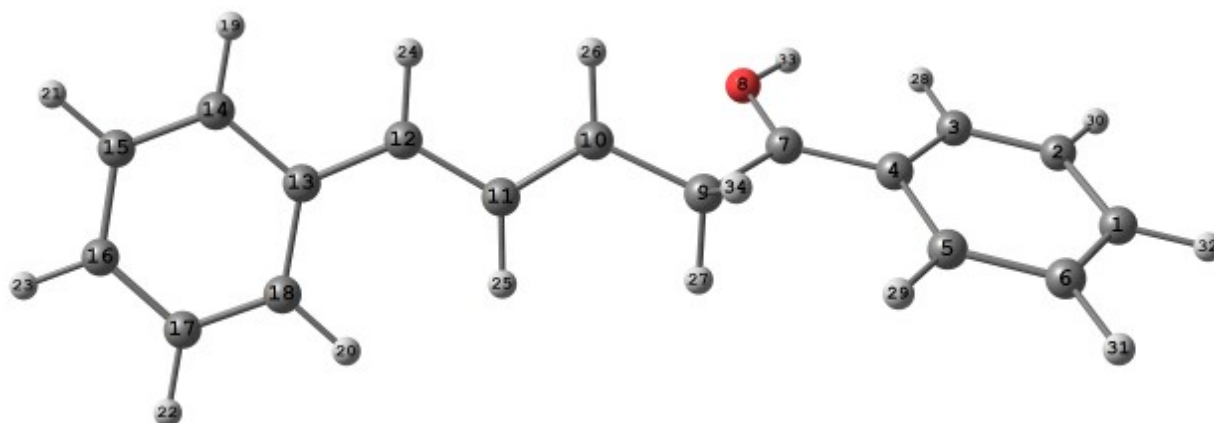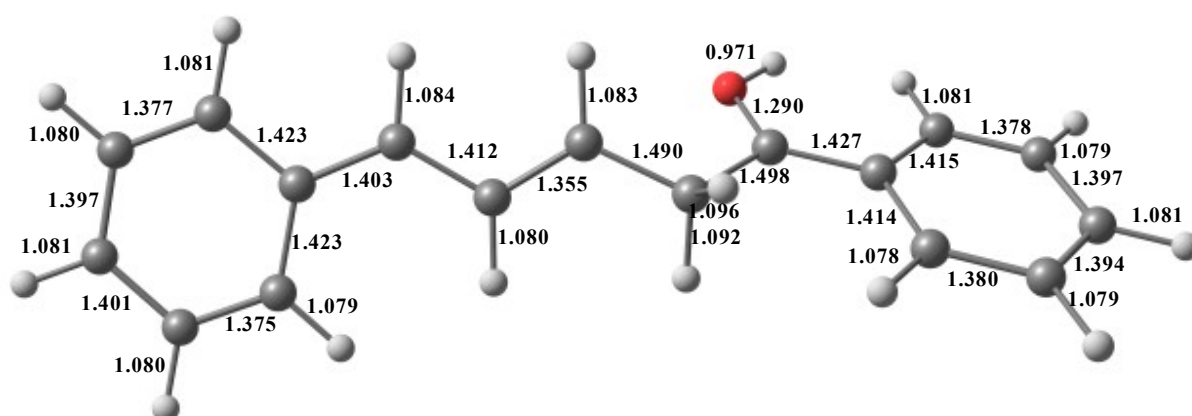

**Summary of Natural Population Analysis:**

Natural Population

| Natural |          | -----   |         |         |         |
|---------|----------|---------|---------|---------|---------|
| Atom No | Charge   | Core    | Valence | Rydberg | Total   |
| C 1     | -0.09698 | 1.99917 | 4.07845 | 0.01936 | 6.09698 |
| C 2     | -0.20345 | 1.99916 | 4.18421 | 0.02009 | 6.20345 |
| C 3     | -0.11121 | 1.99907 | 4.09314 | 0.01901 | 6.11121 |
| C 4     | -0.19997 | 1.99891 | 4.18322 | 0.01784 | 6.19997 |
| C 5     | -0.09525 | 1.99910 | 4.07906 | 0.01709 | 6.09525 |
| C 6     | -0.20875 | 1.99915 | 4.18945 | 0.02015 | 6.20875 |

|   |    |          |         |         |         |         |
|---|----|----------|---------|---------|---------|---------|
| C | 7  | 0.67164  | 1.99905 | 3.30475 | 0.02457 | 5.32836 |
| O | 8  | -0.57472 | 1.99968 | 6.55070 | 0.02434 | 8.57472 |
| C | 9  | -0.54024 | 1.99910 | 4.52228 | 0.01886 | 6.54024 |
| C | 10 | 0.04974  | 1.99914 | 3.93208 | 0.01905 | 5.95026 |
| C | 11 | -0.26791 | 1.99901 | 4.24937 | 0.01953 | 6.26791 |
| C | 12 | 0.10267  | 1.99911 | 3.87964 | 0.01859 | 5.89733 |
| C | 13 | -0.14309 | 1.99901 | 4.12449 | 0.01959 | 6.14309 |
| C | 14 | -0.07792 | 1.99910 | 4.06051 | 0.01831 | 6.07792 |
| C | 15 | -0.22022 | 1.99915 | 4.20109 | 0.01998 | 6.22022 |
| C | 16 | -0.07551 | 1.99918 | 4.05729 | 0.01904 | 6.07551 |
| C | 17 | -0.21364 | 1.99916 | 4.19460 | 0.01989 | 6.21364 |
| C | 18 | -0.09155 | 1.99908 | 4.07521 | 0.01726 | 6.09155 |
| H | 19 | 0.24235  | 0.00000 | 0.75599 | 0.00166 | 0.75765 |
| H | 20 | 0.23871  | 0.00000 | 0.75959 | 0.00170 | 0.76129 |
| H | 21 | 0.24408  | 0.00000 | 0.75431 | 0.00161 | 0.75592 |
| H | 22 | 0.24337  | 0.00000 | 0.75503 | 0.00160 | 0.75663 |
| H | 23 | 0.23970  | 0.00000 | 0.75896 | 0.00134 | 0.76030 |
| H | 24 | 0.24229  | 0.00000 | 0.75580 | 0.00191 | 0.75771 |
| H | 25 | 0.24623  | 0.00000 | 0.75061 | 0.00316 | 0.75377 |
| H | 26 | 0.24363  | 0.00000 | 0.75406 | 0.00231 | 0.75637 |
| H | 27 | 0.29112  | 0.00000 | 0.70720 | 0.00168 | 0.70888 |
| H | 28 | 0.23514  | 0.00000 | 0.76253 | 0.00233 | 0.76486 |
| H | 29 | 0.23864  | 0.00000 | 0.75958 | 0.00178 | 0.76136 |
| H | 30 | 0.24454  | 0.00000 | 0.75390 | 0.00156 | 0.75546 |
| H | 31 | 0.24430  | 0.00000 | 0.75416 | 0.00154 | 0.75570 |
| H | 32 | 0.24034  | 0.00000 | 0.75830 | 0.00136 | 0.75966 |
| H | 33 | 0.55613  | 0.00000 | 0.44142 | 0.00245 | 0.44387 |
| H | 34 | 0.30582  | 0.00000 | 0.69253 | 0.00166 | 0.69418 |

---

\* Total \*    2.00000    35.98431    87.63350    0.38219    124.00000

## B1

Energy E(B3LYP) = -732.472723433 h,  $G^{298} = -732.236072$  h,  $\mu=5.43$  D

### Cartesian coordinates, Å

| N  | atom | x         | y         | z         |
|----|------|-----------|-----------|-----------|
| 1  | C    | 5.722648  | 1.493562  | -0.343113 |
| 2  | C    | 5.854281  | 0.106218  | -0.261725 |
| 3  | C    | 4.731460  | -0.684277 | -0.120829 |
| 4  | C    | 3.451295  | -0.094349 | -0.045334 |
| 5  | C    | 3.336265  | 1.310133  | -0.110943 |
| 6  | C    | 4.465785  | 2.091333  | -0.270506 |
| 7  | C    | 2.275500  | -0.916423 | 0.077705  |
| 8  | O    | 2.304169  | -2.184461 | -0.223173 |
| 9  | C    | 1.013894  | -0.417755 | 0.554002  |
| 10 | C    | -0.097070 | -1.173513 | 0.550546  |
| 11 | C    | -1.407045 | -0.698199 | 1.093792  |
| 12 | C    | -2.555043 | -1.006888 | 0.215407  |
| 13 | C    | -3.699888 | -0.258446 | 0.027674  |
| 14 | C    | -4.707146 | -0.795828 | -0.836999 |
| 15 | C    | -5.873688 | -0.104907 | -1.055629 |
| 16 | C    | -6.066388 | 1.128169  | -0.422803 |



|    |   |           |           |           |
|----|---|-----------|-----------|-----------|
| 17 | C | -5.097073 | 1.680822  | 0.429720  |
| 18 | C | -3.924276 | 1.007569  | 0.655647  |
| 19 | H | -4.532602 | -1.750696 | -1.311613 |
| 20 | H | -3.175953 | 1.434609  | 1.304587  |
| 21 | H | -6.635689 | -0.504595 | -1.706930 |
| 22 | H | -5.278036 | 2.635498  | 0.899524  |
| 23 | H | -6.984311 | 1.672542  | -0.596426 |
| 24 | H | -2.501956 | -1.950896 | -0.316319 |
| 25 | H | -1.369123 | 0.337518  | 1.415608  |
| 26 | H | -0.063573 | -2.182014 | 0.158428  |
| 27 | H | 0.990187  | 0.589745  | 0.935332  |
| 28 | H | 4.862366  | -1.752807 | -0.020065 |
| 29 | H | 2.368706  | 1.784793  | -0.075672 |
| 30 | H | 6.831997  | -0.350066 | -0.299693 |
| 31 | H | 4.370146  | 3.164590  | -0.339094 |
| 32 | H | 6.603712  | 2.108716  | -0.457846 |
| 33 | H | 3.140373  | -2.463867 | -0.626225 |
| 34 | H | -1.600658 | -1.300713 | 2.002108  |

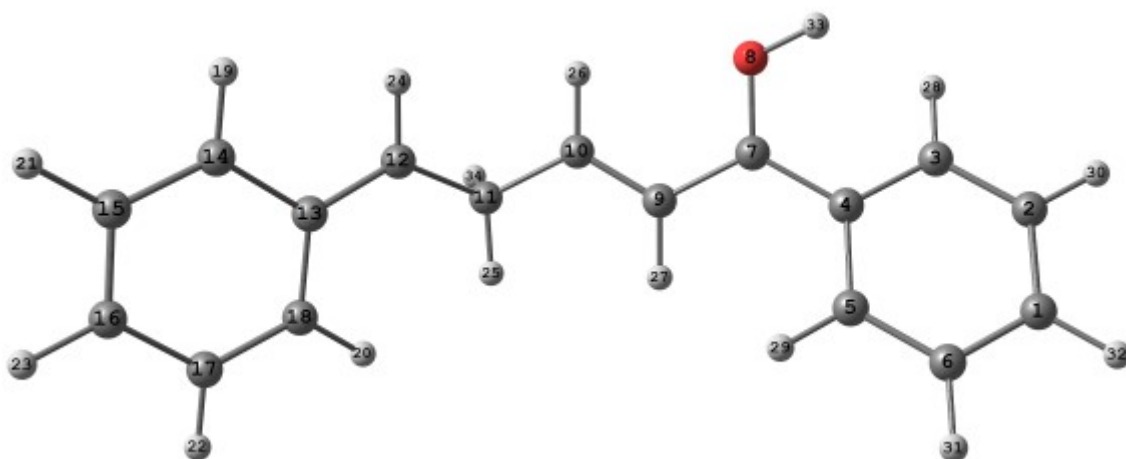

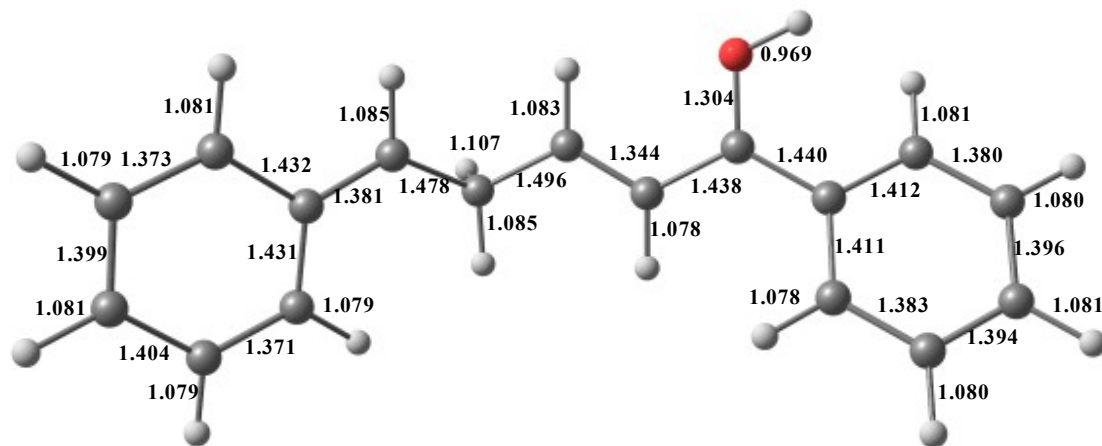

### Summary of Natural Population Analysis:

#### Natural Population

| Atom | No | Natural Charge | Core    | Valence | Rydberg | Total   |
|------|----|----------------|---------|---------|---------|---------|
| C    | 1  | -0.11449       | 1.99917 | 4.09581 | 0.01951 | 6.11449 |
| C    | 2  | -0.20214       | 1.99916 | 4.18276 | 0.02022 | 6.20214 |
| C    | 3  | -0.13503       | 1.99907 | 4.11680 | 0.01916 | 6.13503 |
| C    | 4  | -0.16956       | 1.99893 | 4.15246 | 0.01818 | 6.16956 |
| C    | 5  | -0.11051       | 1.99909 | 4.09405 | 0.01737 | 6.11051 |
| C    | 6  | -0.20876       | 1.99915 | 4.18954 | 0.02007 | 6.20876 |
| C    | 7  | 0.58125        | 1.99897 | 3.39453 | 0.02526 | 5.41875 |
| O    | 8  | -0.59408       | 1.99970 | 6.57034 | 0.02405 | 8.59408 |
| C    | 9  | -0.30259       | 1.99896 | 4.28461 | 0.01902 | 6.30259 |
| C    | 10 | 0.02187        | 1.99909 | 3.96116 | 0.01788 | 5.97813 |
| C    | 11 | -0.52491       | 1.99916 | 4.50648 | 0.01928 | 6.52491 |
| C    | 12 | 0.20752        | 1.99909 | 3.77722 | 0.01618 | 5.79248 |
| C    | 13 | -0.16849       | 1.99898 | 4.14984 | 0.01967 | 6.16849 |
| C    | 14 | -0.03885       | 1.99910 | 4.02134 | 0.01840 | 6.03885 |
| C    | 15 | -0.22802       | 1.99914 | 4.20881 | 0.02007 | 6.22802 |
| C    | 16 | -0.03558       | 1.99919 | 4.01761 | 0.01878 | 6.03558 |
| C    | 17 | -0.21821       | 1.99915 | 4.19908 | 0.01997 | 6.21821 |
| C    | 18 | -0.05862       | 1.99908 | 4.04234 | 0.01720 | 6.05862 |
| H    | 19 | 0.24814        | 0.00000 | 0.75018 | 0.00168 | 0.75186 |
| H    | 20 | 0.24198        | 0.00000 | 0.75629 | 0.00173 | 0.75802 |
| H    | 21 | 0.25131        | 0.00000 | 0.74710 | 0.00159 | 0.74869 |

|   |    |         |         |         |         |         |
|---|----|---------|---------|---------|---------|---------|
| H | 22 | 0.25041 | 0.00000 | 0.74800 | 0.00159 | 0.74959 |
| H | 23 | 0.24580 | 0.00000 | 0.75291 | 0.00129 | 0.75420 |
| H | 24 | 0.24559 | 0.00000 | 0.75250 | 0.00191 | 0.75441 |
| H | 25 | 0.25474 | 0.00000 | 0.74254 | 0.00273 | 0.74526 |
| H | 26 | 0.24478 | 0.00000 | 0.75276 | 0.00246 | 0.75522 |
| H | 27 | 0.25552 | 0.00000 | 0.74265 | 0.00183 | 0.74448 |
| H | 28 | 0.23544 | 0.00000 | 0.76228 | 0.00227 | 0.76456 |
| H | 29 | 0.23864 | 0.00000 | 0.75968 | 0.00168 | 0.76136 |
| H | 30 | 0.24073 | 0.00000 | 0.75770 | 0.00157 | 0.75927 |
| H | 31 | 0.24018 | 0.00000 | 0.75827 | 0.00155 | 0.75982 |
| H | 32 | 0.23654 | 0.00000 | 0.76207 | 0.00139 | 0.76346 |
| H | 33 | 0.54832 | 0.00000 | 0.44919 | 0.00249 | 0.45168 |
| H | 34 | 0.32108 | 0.00000 | 0.67718 | 0.00174 | 0.67892 |

---

\* Total \*    2.00000    35.98417    87.63606    0.37977    124.00000

### D1

Energy E(B3LYP) = -732.802953022 h,  $G^{298}$  = -732.555979 h,  $\mu=4.43$  D

### Cartesian coordinates, Å

| N  | atom | x         | y         | z         |
|----|------|-----------|-----------|-----------|
| 1  | C    | 6.085545  | 1.113846  | -0.119873 |
| 2  | C    | 6.015484  | -0.261925 | 0.109395  |
| 3  | C    | 4.791811  | -0.884739 | 0.148077  |
| 4  | C    | 3.613586  | -0.126428 | -0.034819 |
| 5  | C    | 3.699537  | 1.266684  | -0.246831 |
| 6  | C    | 4.933576  | 1.875158  | -0.298714 |
| 7  | C    | 2.346555  | -0.754672 | -0.019559 |
| 8  | O    | 2.157446  | -2.018530 | -0.010475 |
| 9  | C    | 1.061040  | 0.027641  | -0.001367 |
| 10 | C    | -0.162920 | -0.741161 | 0.059702  |
| 11 | C    | -1.387005 | -0.175623 | 0.550625  |
| 12 | C    | -2.650657 | -0.836410 | 0.133333  |
| 13 | C    | -3.868509 | -0.229462 | 0.039768  |
| 14 | C    | -4.981593 | -1.053385 | -0.343792 |
| 15 | C    | -6.233499 | -0.512101 | -0.436836 |
| 16 | C    | -6.406117 | 0.848644  | -0.158855 |
| 17 | C    | -5.338666 | 1.683098  | 0.214771  |
| 18 | C    | -4.081448 | 1.163628  | 0.313637  |
| 19 | H    | -4.807169 | -2.099966 | -0.551463 |
| 20 | H    | -3.257024 | 1.799759  | 0.597045  |
| 21 | H    | -7.079407 | -1.118480 | -0.720710 |
| 22 | H    | -5.519995 | 2.727223  | 0.416900  |
| 23 | H    | -7.396750 | 1.276444  | -0.236499 |
| 24 | H    | -2.588012 | -1.897384 | -0.086015 |
| 25 | H    | -1.384234 | 0.908436  | 0.614928  |
| 26 | H    | -0.152980 | -1.782247 | -0.255192 |
| 27 | H    | 1.077564  | 0.856865  | 0.707626  |
| 28 | H    | 4.760025  | -1.946603 | 0.349313  |
| 29 | H    | 2.811710  | 1.863879  | -0.389676 |
| 30 | H    | 6.918213  | -0.833568 | 0.260259  |
| 31 | H    | 5.004268  | 2.937435  | -0.474618 |

|    |   |           |           |           |
|----|---|-----------|-----------|-----------|
| 32 | H | 7.052405  | 1.596380  | -0.154196 |
| 33 | H | 2.963307  | -2.559131 | -0.070935 |
| 34 | H | -1.212233 | -0.518801 | 1.619024  |
| 35 | H | 0.930428  | 0.521255  | -0.993968 |

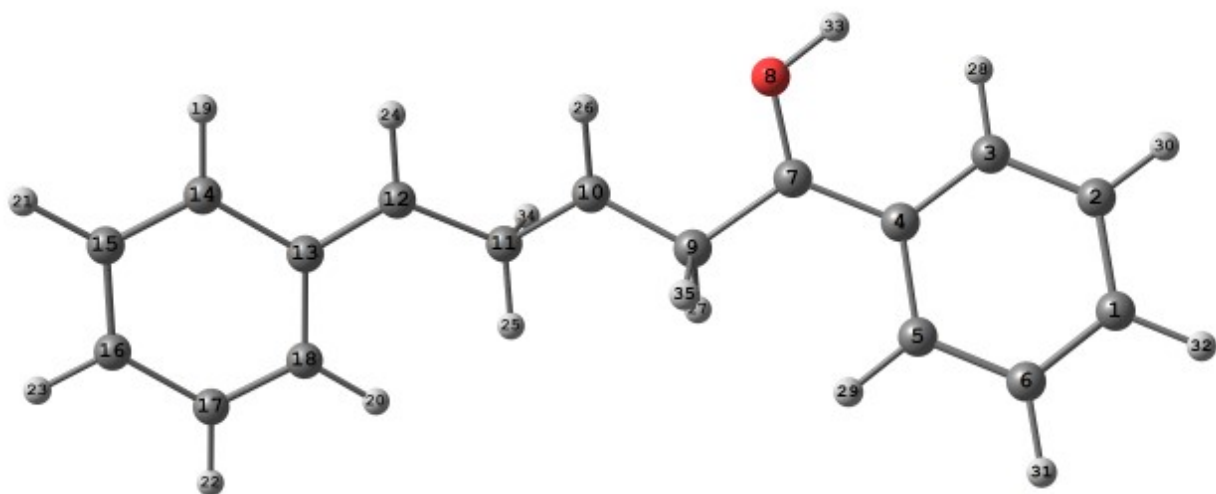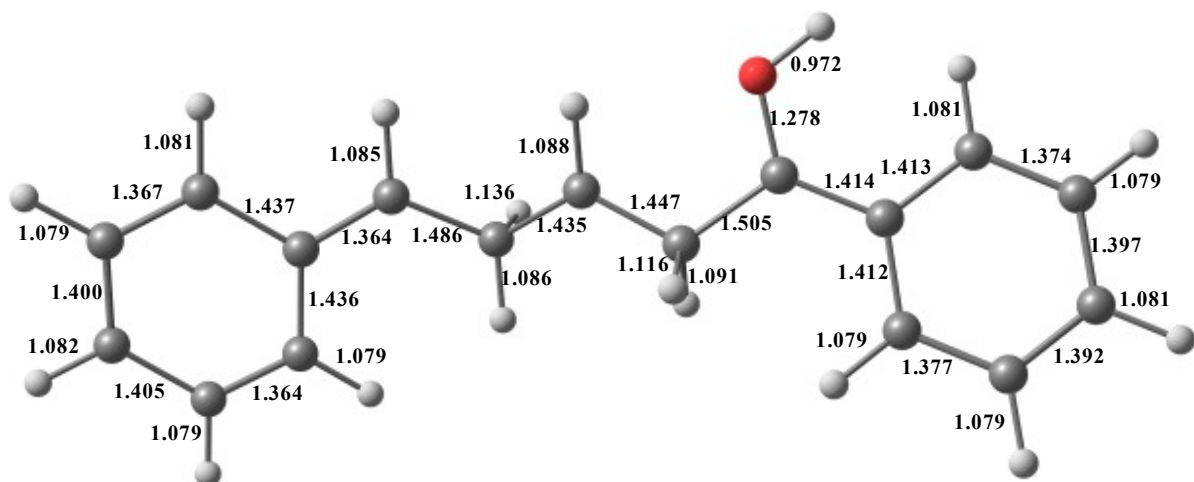

**Summary of Natural Population Analysis:**

Natural Population

|           |    | Natural ----- |          |          |         |           |
|-----------|----|---------------|----------|----------|---------|-----------|
| Atom      | No | Charge        | Core     | Valence  | Rydberg | Total     |
| C         | 1  | -0.06921      | 1.99917  | 4.05078  | 0.01925 | 6.06921   |
| C         | 2  | -0.19607      | 1.99915  | 4.17685  | 0.02007 | 6.19607   |
| C         | 3  | -0.10125      | 1.99906  | 4.08328  | 0.01891 | 6.10125   |
| C         | 4  | -0.18893      | 1.99891  | 4.17214  | 0.01788 | 6.18893   |
| C         | 5  | -0.08783      | 1.99909  | 4.07186  | 0.01688 | 6.08783   |
| C         | 6  | -0.20450      | 1.99915  | 4.18510  | 0.02026 | 6.20450   |
| C         | 7  | 0.64669       | 1.99903  | 3.32852  | 0.02575 | 5.35331   |
| O         | 8  | -0.56940      | 1.99967  | 6.54520  | 0.02454 | 8.56940   |
| C         | 9  | -0.60588      | 1.99904  | 4.58612  | 0.02073 | 6.60588   |
| C         | 10 | 0.40456       | 1.99922  | 3.57979  | 0.01643 | 5.59544   |
| C         | 11 | -0.58135      | 1.99908  | 4.56001  | 0.02227 | 6.58135   |
| C         | 12 | 0.15337       | 1.99904  | 3.82975  | 0.01784 | 5.84663   |
| C         | 13 | -0.14078      | 1.99897  | 4.12230  | 0.01951 | 6.14078   |
| C         | 14 | -0.02280      | 1.99910  | 4.00540  | 0.01831 | 6.02280   |
| C         | 15 | -0.22594      | 1.99913  | 4.20669  | 0.02012 | 6.22594   |
| C         | 16 | 0.00604       | 1.99920  | 3.97613  | 0.01864 | 5.99396   |
| C         | 17 | -0.21400      | 1.99915  | 4.19466  | 0.02019 | 6.21400   |
| C         | 18 | -0.05328      | 1.99908  | 4.03718  | 0.01702 | 6.05328   |
| H         | 19 | 0.25432       | 0.00000  | 0.74403  | 0.00165 | 0.74568   |
| H         | 20 | 0.24514       | 0.00000  | 0.75302  | 0.00184 | 0.75486   |
| H         | 21 | 0.25764       | 0.00000  | 0.74080  | 0.00156 | 0.74236   |
| H         | 22 | 0.25688       | 0.00000  | 0.74157  | 0.00155 | 0.74312   |
| H         | 23 | 0.24954       | 0.00000  | 0.74920  | 0.00126 | 0.75046   |
| H         | 24 | 0.26659       | 0.00000  | 0.73153  | 0.00189 | 0.73341   |
| H         | 25 | 0.30369       | 0.00000  | 0.69459  | 0.00172 | 0.69631   |
| H         | 26 | 0.28596       | 0.00000  | 0.71106  | 0.00298 | 0.71404   |
| H         | 27 | 0.33006       | 0.00000  | 0.66823  | 0.00170 | 0.66994   |
| H         | 28 | 0.24154       | 0.00000  | 0.75625  | 0.00221 | 0.75846   |
| H         | 29 | 0.24017       | 0.00000  | 0.75800  | 0.00183 | 0.75983   |
| H         | 30 | 0.24786       | 0.00000  | 0.75060  | 0.00154 | 0.75214   |
| H         | 31 | 0.24810       | 0.00000  | 0.75038  | 0.00152 | 0.75190   |
| H         | 32 | 0.24234       | 0.00000  | 0.75634  | 0.00133 | 0.75766   |
| H         | 33 | 0.57015       | 0.00000  | 0.42751  | 0.00234 | 0.42985   |
| H         | 34 | 0.41774       | 0.00000  | 0.58034  | 0.00192 | 0.58226   |
| H         | 35 | 0.39289       | 0.00000  | 0.60525  | 0.00186 | 0.60711   |
| =====     |    |               |          |          |         |           |
| * Total * |    | 3.00000       | 35.98424 | 87.63046 | 0.38531 | 124.00000 |

1g

Energy E(B3LYP) = -575.829970845 h,  $G^{298} = -575.687329$  h,  $\mu=4.31$  D

Cartesian coordinates, Å

| N  | atom | x         | y         | z         |
|----|------|-----------|-----------|-----------|
| 1  | C    | -2.015542 | 0.237505  | 0.000731  |
| 2  | C    | -2.972734 | 1.265104  | -0.000859 |
| 3  | C    | -2.470834 | -1.092716 | 0.001779  |
| 4  | C    | -4.332573 | 0.979473  | -0.001712 |
| 5  | C    | -3.827897 | -1.376468 | 0.000987  |
| 6  | C    | -4.765548 | -0.342929 | -0.000831 |
| 7  | H    | -2.639941 | 2.294830  | -0.001497 |
| 8  | H    | -1.763378 | -1.909516 | 0.003446  |
| 9  | H    | -5.051806 | 1.786789  | -0.003011 |
| 10 | H    | -4.159369 | -2.405735 | 0.001882  |
| 11 | H    | -5.822688 | -0.569602 | -0.001429 |
| 12 | C    | -0.602676 | 0.600180  | 0.001250  |
| 13 | H    | -0.403399 | 1.666820  | 0.002919  |
| 14 | C    | 0.460741  | -0.231980 | -0.000383 |
| 15 | H    | 0.323779  | -1.306369 | -0.002439 |
| 16 | C    | 1.812030  | 0.254433  | 0.000356  |
| 17 | H    | 1.954715  | 1.329529  | 0.002167  |
| 18 | C    | 2.907195  | -0.531456 | -0.001033 |
| 19 | H    | 2.828353  | -1.609464 | -0.002794 |
| 20 | C    | 4.253263  | 0.039862  | -0.000132 |
| 21 | O    | 4.539958  | 1.223423  | 0.001672  |
| 22 | O    | 5.208852  | -0.923612 | -0.001581 |
| 23 | H    | 6.070709  | -0.481818 | -0.000895 |

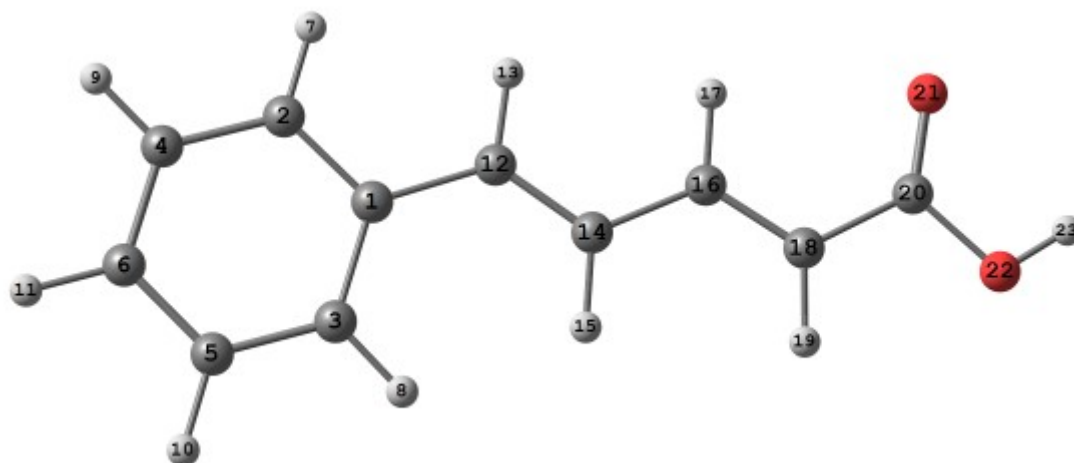

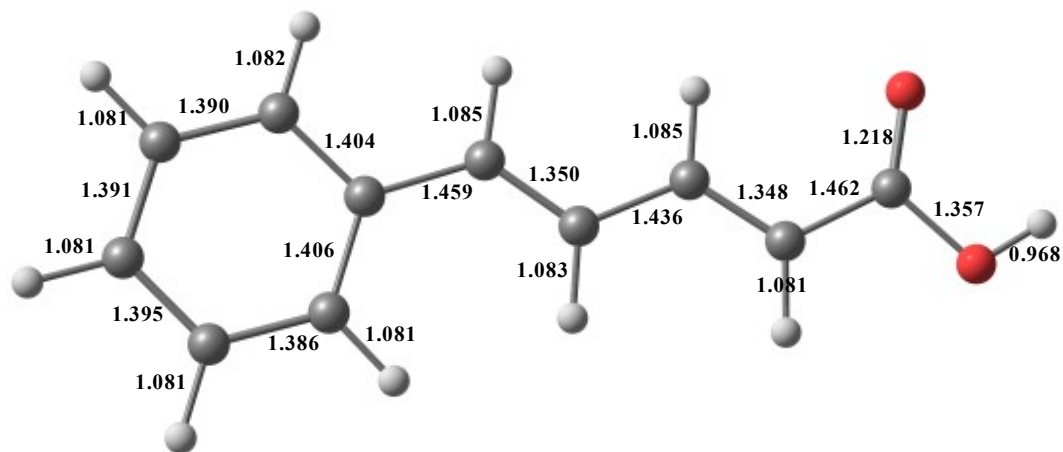

### Summary of Natural Population Analysis:

#### Natural Population

| Atom | No | Natural Charge | Core    | Valence | Rydberg | Total   |
|------|----|----------------|---------|---------|---------|---------|
| C    | 1  | -0.10051       | 1.99901 | 4.08168 | 0.01982 | 6.10051 |
| C    | 2  | -0.17974       | 1.99908 | 4.16151 | 0.01914 | 6.17974 |
| C    | 3  | -0.18233       | 1.99907 | 4.16515 | 0.01811 | 6.18233 |
| C    | 4  | -0.21327       | 1.99915 | 4.19371 | 0.02040 | 6.21327 |
| C    | 5  | -0.20965       | 1.99916 | 4.19020 | 0.02029 | 6.20965 |
| C    | 6  | -0.20042       | 1.99916 | 4.18063 | 0.02063 | 6.20042 |
| H    | 7  | 0.22192        | 0.00000 | 0.77623 | 0.00186 | 0.77808 |
| H    | 8  | 0.22043        | 0.00000 | 0.77778 | 0.00179 | 0.77957 |
| H    | 9  | 0.22321        | 0.00000 | 0.77512 | 0.00168 | 0.77679 |
| H    | 10 | 0.22265        | 0.00000 | 0.77568 | 0.00167 | 0.77735 |
| H    | 11 | 0.22223        | 0.00000 | 0.77622 | 0.00155 | 0.77777 |
| C    | 12 | -0.13101       | 1.99907 | 4.11269 | 0.01925 | 6.13101 |
| H    | 13 | 0.21643        | 0.00000 | 0.78145 | 0.00211 | 0.78357 |
| C    | 14 | -0.23386       | 1.99905 | 4.21543 | 0.01937 | 6.23386 |
| H    | 15 | 0.21523        | 0.00000 | 0.78115 | 0.00362 | 0.78477 |
| C    | 16 | -0.12004       | 1.99909 | 4.10100 | 0.01995 | 6.12004 |
| H    | 17 | 0.22363        | 0.00000 | 0.77385 | 0.00252 | 0.77637 |
| C    | 18 | -0.33133       | 1.99897 | 4.31083 | 0.02152 | 6.33133 |
| H    | 19 | 0.22786        | 0.00000 | 0.77003 | 0.00211 | 0.77214 |
| C    | 20 | 0.78588        | 1.99937 | 3.17574 | 0.03901 | 5.21412 |
| O    | 21 | -0.68948       | 1.99974 | 6.66331 | 0.02643 | 8.68948 |

|   |    |          |         |         |         |         |
|---|----|----------|---------|---------|---------|---------|
| O | 22 | -0.71748 | 1.99975 | 6.69502 | 0.02270 | 8.71748 |
| H | 23 | 0.52965  | 0.00000 | 0.46728 | 0.00307 | 0.47035 |

---



---

|           |         |          |          |         |          |
|-----------|---------|----------|----------|---------|----------|
| * Total * | 0.00000 | 25.98967 | 65.70170 | 0.30863 | 92.00000 |
|-----------|---------|----------|----------|---------|----------|

**A2**

**Energy E(B3LYP) = -576.243337793 h, G<sup>298</sup> = -576.088732 h,  $\mu=10.0$  D**

**Cartesian coordinates, Å**

| N  | atom | x         | y         | z         |
|----|------|-----------|-----------|-----------|
| 1  | C    | -2.043288 | 0.224478  | 0.000086  |
| 2  | C    | -2.978697 | 1.276685  | -0.001143 |
| 3  | C    | -2.519973 | -1.101612 | 0.001486  |
| 4  | C    | -4.340542 | 1.016264  | -0.001224 |
| 5  | C    | -3.879716 | -1.356809 | 0.001582  |
| 6  | C    | -4.793539 | -0.300539 | 0.000167  |
| 7  | H    | -2.623230 | 2.298220  | -0.002123 |
| 8  | H    | -1.827082 | -1.930002 | 0.002754  |
| 9  | H    | -5.047039 | 1.833958  | -0.002290 |
| 10 | H    | -4.235051 | -2.377426 | 0.002828  |
| 11 | H    | -5.854719 | -0.506858 | 0.000238  |
| 12 | C    | -0.639175 | 0.558270  | 0.000035  |
| 13 | H    | -0.415600 | 1.619587  | 0.000855  |
| 14 | C    | 0.421837  | -0.299557 | -0.001034 |
| 15 | H    | 0.276585  | -1.371249 | -0.002376 |
| 16 | C    | 1.743445  | 0.193603  | -0.000367 |
| 17 | H    | 1.874784  | 1.268891  | 0.001218  |
| 18 | C    | 2.864785  | -0.599648 | -0.001510 |
| 19 | H    | 2.785940  | -1.676722 | -0.003384 |
| 20 | C    | 4.154649  | -0.053726 | -0.000066 |
| 21 | O    | 4.343694  | 1.236785  | 0.002845  |
| 22 | H    | 5.289031  | 1.456586  | 0.004327  |
| 23 | O    | 5.251493  | -0.766774 | -0.001252 |
| 24 | H    | 5.076168  | -1.719529 | -0.002855 |

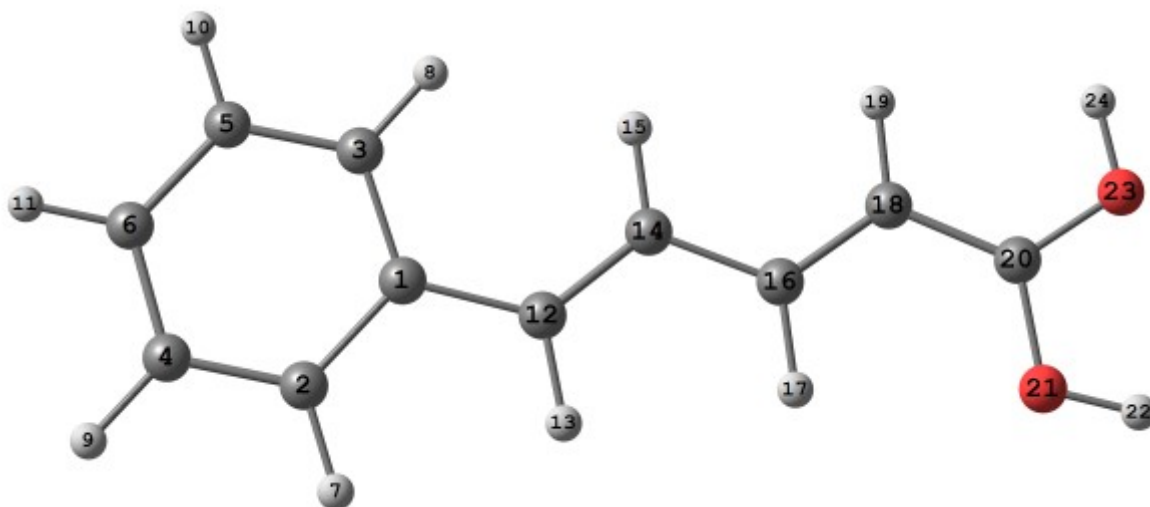



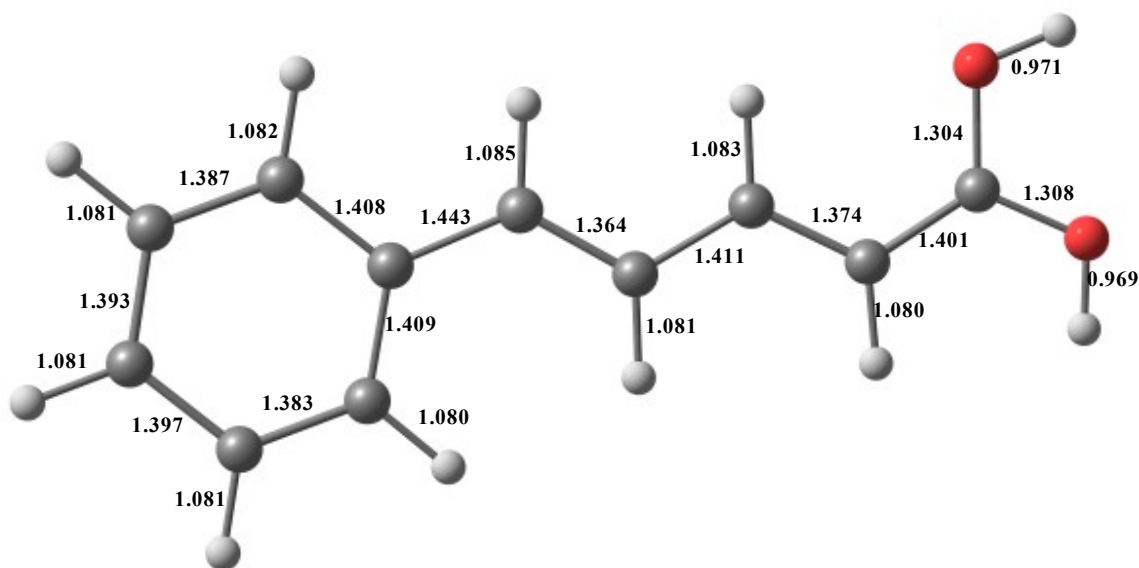

### Summary of Natural Population Analysis:

#### Natural Population

| Atom | No | Natural Charge | Core    | Valence | Rydberg | Total   |
|------|----|----------------|---------|---------|---------|---------|
| C    | 1  | -0.12614       | 1.99901 | 4.10746 | 0.01967 | 6.12614 |
| C    | 2  | -0.15149       | 1.99909 | 4.13352 | 0.01888 | 6.15149 |
| C    | 3  | -0.15938       | 1.99907 | 4.14248 | 0.01783 | 6.15938 |
| C    | 4  | -0.21248       | 1.99915 | 4.19309 | 0.02024 | 6.21248 |
| C    | 5  | -0.20740       | 1.99916 | 4.18812 | 0.02013 | 6.20740 |
| C    | 6  | -0.16059       | 1.99916 | 4.14134 | 0.02009 | 6.16059 |
| H    | 7  | 0.22816        | 0.00000 | 0.77006 | 0.00178 | 0.77184 |
| H    | 8  | 0.22619        | 0.00000 | 0.77206 | 0.00175 | 0.77381 |
| H    | 9  | 0.22828        | 0.00000 | 0.77007 | 0.00166 | 0.77172 |
| H    | 10 | 0.22771        | 0.00000 | 0.77064 | 0.00165 | 0.77229 |
| H    | 11 | 0.22551        | 0.00000 | 0.77301 | 0.00148 | 0.77449 |
| C    | 12 | -0.05660       | 1.99909 | 4.03873 | 0.01877 | 6.05660 |
| H    | 13 | 0.22839        | 0.00000 | 0.76963 | 0.00197 | 0.77161 |
| C    | 14 | -0.25629       | 1.99906 | 4.23756 | 0.01967 | 6.25629 |
| H    | 15 | 0.22920        | 0.00000 | 0.76739 | 0.00341 | 0.77080 |
| C    | 16 | -0.03610       | 1.99914 | 4.01754 | 0.01942 | 6.03610 |
| H    | 17 | 0.23534        | 0.00000 | 0.76245 | 0.00221 | 0.76466 |
| C    | 18 | -0.37376       | 1.99900 | 4.35511 | 0.01966 | 6.37376 |
| H    | 19 | 0.25267        | 0.00000 | 0.74529 | 0.00204 | 0.74733 |
| C    | 20 | 0.81891        | 1.99918 | 3.15268 | 0.02923 | 5.18109 |
| O    | 21 | -0.64193       | 1.99970 | 6.61693 | 0.02530 | 8.64193 |

|   |    |          |         |         |         |         |
|---|----|----------|---------|---------|---------|---------|
| H | 22 | 0.55940  | 0.00000 | 0.43791 | 0.00270 | 0.44060 |
| O | 23 | -0.63944 | 1.99970 | 6.61493 | 0.02482 | 8.63944 |
| H | 24 | 0.56185  | 0.00000 | 0.43583 | 0.00232 | 0.43815 |

---

\* Total \* 1.00000 25.98950 65.71382 0.29669 92.00000

**C2**

Energy E(B3LYP) = -576.625554807 h,  $G^{298}$  = -576.457641 h,  $\mu=13.6$  D

Cartesian coordinates, Å

| N  | atom | x         | y         | z         |
|----|------|-----------|-----------|-----------|
| 1  | C    | -2.028459 | 0.220377  | 0.110120  |
| 2  | C    | -2.990453 | 1.269711  | 0.152718  |
| 3  | C    | -2.467558 | -1.112714 | -0.132601 |
| 4  | C    | -4.325895 | 0.998427  | -0.041393 |
| 5  | C    | -3.804493 | -1.369494 | -0.321747 |
| 6  | C    | -4.731052 | -0.318406 | -0.277537 |
| 7  | H    | -2.655562 | 2.280576  | 0.336516  |
| 8  | H    | -1.756542 | -1.923479 | -0.166884 |
| 9  | H    | -5.055944 | 1.793052  | -0.011772 |
| 10 | H    | -4.144244 | -2.377751 | -0.504504 |
| 11 | H    | -5.779953 | -0.532019 | -0.428667 |
| 12 | C    | -0.685107 | 0.559088  | 0.309926  |
| 13 | H    | -0.474908 | 1.605836  | 0.497411  |
| 14 | C    | 0.433983  | -0.307032 | 0.286415  |
| 15 | H    | 0.308673  | -1.362904 | 0.096641  |
| 16 | C    | 1.665799  | 0.208033  | 0.496934  |
| 17 | H    | 1.774272  | 1.267706  | 0.687349  |
| 18 | C    | 2.906371  | -0.620671 | 0.534811  |
| 19 | H    | 2.757764  | -1.621661 | 0.126194  |
| 20 | C    | 4.083312  | -0.009031 | -0.143495 |
| 21 | O    | 3.958802  | 1.146270  | -0.664752 |
| 22 | H    | 4.779699  | 1.477101  | -1.078017 |
| 23 | H    | 3.202276  | -0.766151 | 1.583780  |
| 24 | O    | 5.220998  | -0.582728 | -0.231825 |
| 25 | H    | 5.267370  | -1.458380 | 0.189675  |

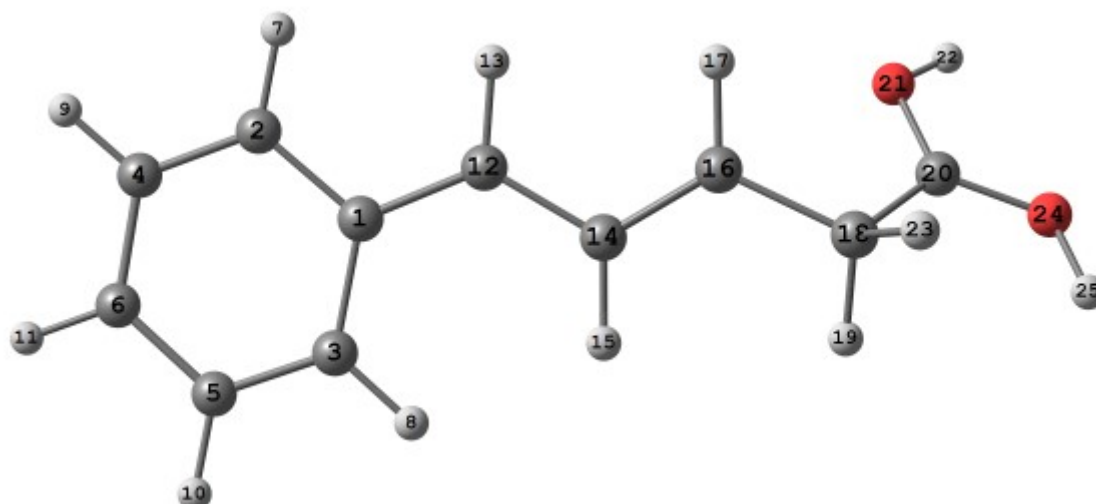

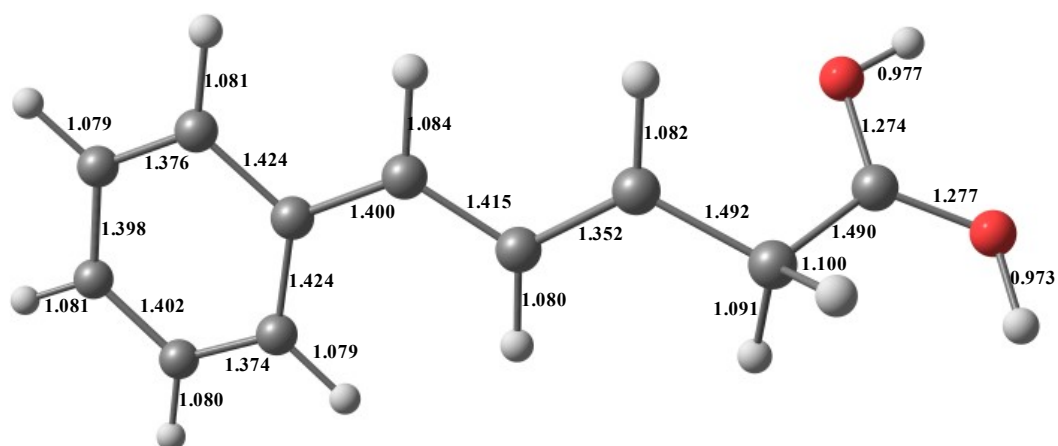

**Summary of Natural Population Analysis:**  
Natural Population

|           |          | Natural | -----    |          |         |          |  |
|-----------|----------|---------|----------|----------|---------|----------|--|
| Atom No   | Charge   | Core    | Valence  | Rydberg  | Total   |          |  |
| C 1       | -0.14364 | 1.99901 | 4.12504  | 0.01960  | 6.14364 |          |  |
| C 2       | -0.07428 | 1.99910 | 4.05688  | 0.01831  | 6.07428 |          |  |
| C 3       | -0.08879 | 1.99908 | 4.07244  | 0.01727  | 6.08879 |          |  |
| C 4       | -0.21955 | 1.99915 | 4.20038  | 0.02002  | 6.21955 |          |  |
| C 5       | -0.21318 | 1.99916 | 4.19410  | 0.01992  | 6.21318 |          |  |
| C 6       | -0.07471 | 1.99918 | 4.05651  | 0.01902  | 6.07471 |          |  |
| H 7       | 0.24386  | 0.00000 | 0.75449  | 0.00165  | 0.75614 |          |  |
| H 8       | 0.24032  | 0.00000 | 0.75800  | 0.00168  | 0.75968 |          |  |
| H 9       | 0.24566  | 0.00000 | 0.75274  | 0.00160  | 0.75434 |          |  |
| H 10      | 0.24498  | 0.00000 | 0.75343  | 0.00159  | 0.75502 |          |  |
| H 11      | 0.24180  | 0.00000 | 0.75686  | 0.00134  | 0.75820 |          |  |
| C 12      | 0.10062  | 1.99911 | 3.88176  | 0.01852  | 5.89938 |          |  |
| H 13      | 0.24483  | 0.00000 | 0.75330  | 0.00187  | 0.75517 |          |  |
| C 14      | -0.26513 | 1.99901 | 4.24645  | 0.01967  | 6.26513 |          |  |
| H 15      | 0.24901  | 0.00000 | 0.74790  | 0.00309  | 0.75099 |          |  |
| C 16      | 0.04189  | 1.99913 | 3.94069  | 0.01829  | 5.95811 |          |  |
| H 17      | 0.24588  | 0.00000 | 0.75205  | 0.00207  | 0.75412 |          |  |
| C 18      | -0.56059 | 1.99910 | 4.54295  | 0.01854  | 6.56059 |          |  |
| H 19      | 0.29359  | 0.00000 | 0.70460  | 0.00180  | 0.70641 |          |  |
| C 20      | 0.93804  | 1.99944 | 3.03185  | 0.03067  | 5.06196 |          |  |
| O 21      | -0.58285 | 1.99966 | 6.55720  | 0.02599  | 8.58285 |          |  |
| H 22      | 0.58239  | 0.00000 | 0.41508  | 0.00253  | 0.41761 |          |  |
| H 23      | 0.31778  | 0.00000 | 0.68053  | 0.00169  | 0.68222 |          |  |
| O 24      | -0.58938 | 1.99966 | 6.56289  | 0.02684  | 8.58938 |          |  |
| H 25      | 0.58146  | 0.00000 | 0.41627  | 0.00227  | 0.41854 |          |  |
| * Total * |          | 2.00000 | 25.98978 | 65.71439 | 0.29583 | 92.00000 |  |

B2

Energy E(B3LYP) = -576.6167406 h,  $G^{298}$  = -576.449601 h,  $\mu$ =6.64 D

Cartesian coordinates, Å

| N  | atom | x         | y         | z         |
|----|------|-----------|-----------|-----------|
| 1  | C    | -1.973601 | -0.269849 | 0.184733  |
| 2  | C    | -2.892528 | -1.294944 | -0.212294 |
| 3  | C    | -2.420129 | 1.089482  | 0.222770  |
| 4  | C    | -4.184485 | -0.974172 | -0.549148 |
| 5  | C    | -3.714870 | 1.390083  | -0.112453 |
| 6  | C    | -4.592165 | 0.363593  | -0.498385 |
| 7  | H    | -2.552182 | -2.319977 | -0.239805 |
| 8  | H    | -1.742774 | 1.877175  | 0.512697  |
| 9  | H    | -4.881066 | -1.741636 | -0.849685 |
| 10 | H    | -4.063123 | 2.411237  | -0.086611 |
| 11 | H    | -5.609235 | 0.615526  | -0.765155 |
| 12 | C    | -0.691703 | -0.656358 | 0.517476  |
| 13 | H    | -0.470488 | -1.716138 | 0.447528  |
| 14 | C    | 0.411143  | 0.200508  | 1.005416  |
| 15 | H    | 0.259179  | 1.258526  | 0.819346  |
| 16 | C    | 1.762804  | -0.262785 | 0.566768  |
| 17 | H    | 1.973744  | -1.321666 | 0.649284  |
| 18 | C    | 2.708646  | 0.570113  | 0.111106  |
| 19 | H    | 2.537502  | 1.631508  | 0.006343  |
| 20 | C    | 4.004806  | 0.083264  | -0.269271 |
| 21 | O    | 4.287495  | -1.166314 | -0.151935 |
| 22 | H    | 5.191088  | -1.375148 | -0.447791 |
| 23 | H    | 0.384983  | 0.069225  | 2.104098  |
| 24 | O    | 4.935640  | 0.841599  | -0.740193 |
| 25 | H    | 4.679782  | 1.775479  | -0.813541 |

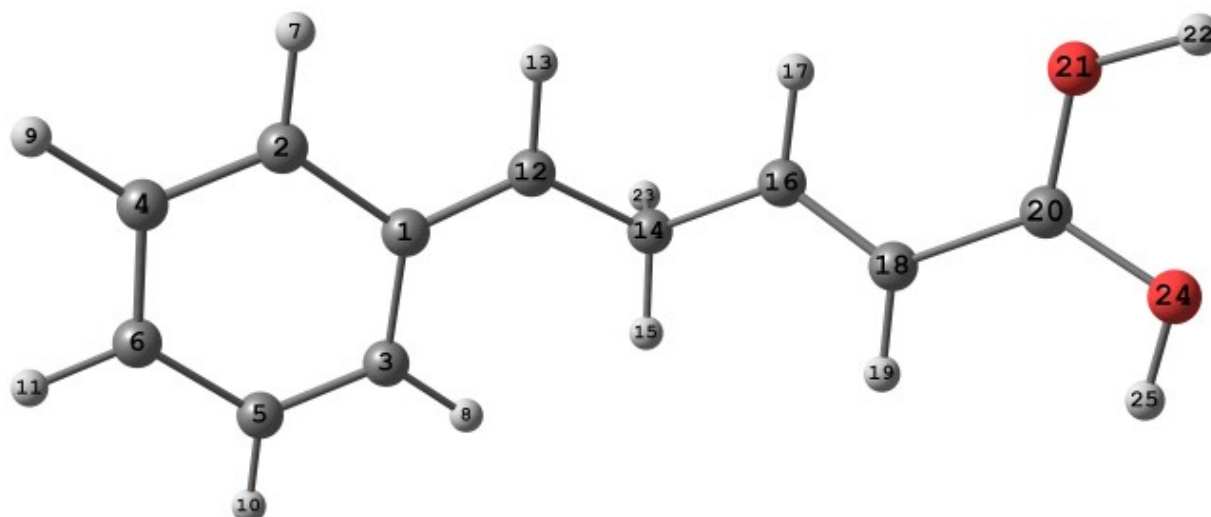

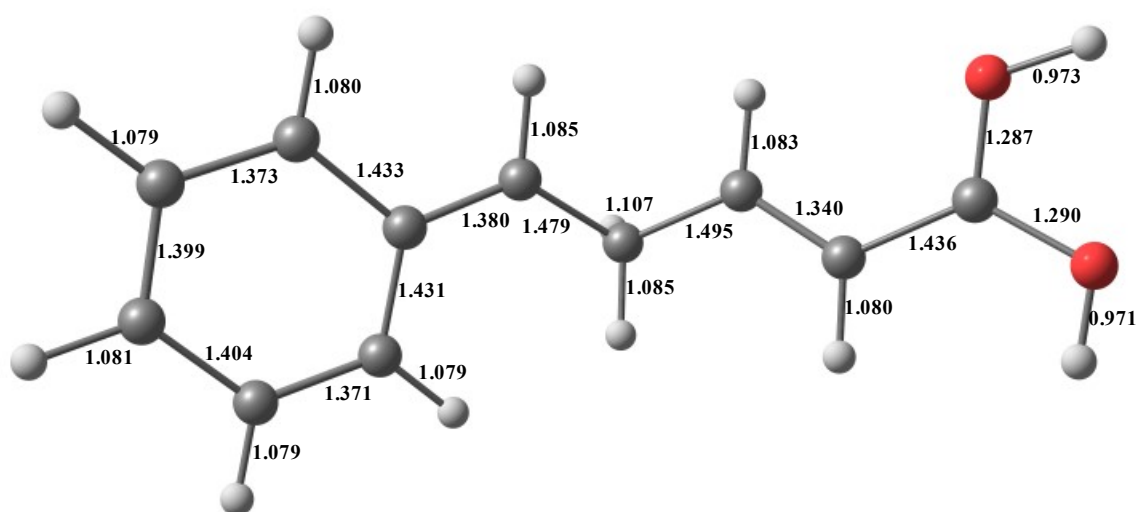

**Summary of Natural Population Analysis:**  
Natural Population

| Natural |        | -----    |         |         |         |         |
|---------|--------|----------|---------|---------|---------|---------|
| Atom No | Charge | Core     | Valence | Rydberg | Total   |         |
| C       | 1      | -0.17016 | 1.99898 | 4.15154 | 0.01965 | 6.17016 |
| C       | 2      | -0.03886 | 1.99910 | 4.02136 | 0.01839 | 6.03886 |
| C       | 3      | -0.05878 | 1.99908 | 4.04249 | 0.01720 | 6.05878 |
| C       | 4      | -0.22849 | 1.99914 | 4.20926 | 0.02008 | 6.22849 |
| C       | 5      | -0.21858 | 1.99915 | 4.19944 | 0.01998 | 6.21858 |
| C       | 6      | -0.03491 | 1.99919 | 4.01693 | 0.01879 | 6.03491 |
| H       | 7      | 0.24878  | 0.00000 | 0.74955 | 0.00167 | 0.75122 |
| H       | 8      | 0.24256  | 0.00000 | 0.75572 | 0.00172 | 0.75744 |
| H       | 9      | 0.25183  | 0.00000 | 0.74658 | 0.00159 | 0.74817 |
| H       | 10     | 0.25099  | 0.00000 | 0.74742 | 0.00158 | 0.74901 |
| H       | 11     | 0.24628  | 0.00000 | 0.75242 | 0.00129 | 0.75372 |
| C       | 12     | 0.20987  | 1.99909 | 3.77492 | 0.01613 | 5.79013 |
| H       | 13     | 0.24597  | 0.00000 | 0.75214 | 0.00189 | 0.75403 |
| C       | 14     | -0.52687 | 1.99916 | 4.50812 | 0.01959 | 6.52687 |
| H       | 15     | 0.25611  | 0.00000 | 0.74112 | 0.00277 | 0.74389 |
| C       | 16     | 0.03348  | 1.99910 | 3.94942 | 0.01800 | 5.96652 |
| H       | 17     | 0.24702  | 0.00000 | 0.75086 | 0.00212 | 0.75298 |
| C       | 18     | -0.35520 | 1.99894 | 4.33726 | 0.01900 | 6.35520 |
| H       | 19     | 0.26749  | 0.00000 | 0.73048 | 0.00203 | 0.73251 |
| C       | 20     | 0.87064  | 1.99931 | 3.10034 | 0.02971 | 5.12936 |
| O       | 21     | -0.60673 | 1.99968 | 6.58162 | 0.02543 | 8.60673 |
| H       | 22     | 0.57245  | 0.00000 | 0.42499 | 0.00256 | 0.42755 |
| H       | 23     | 0.32251  | 0.00000 | 0.67579 | 0.00170 | 0.67749 |
| O       | 24     | -0.60129 | 1.99968 | 6.57609 | 0.02552 | 8.60129 |
| H       | 25     | 0.57388  | 0.00000 | 0.42385 | 0.00227 | 0.42612 |

\* Total \* 2.00000 25.98960 65.71973 0.29067 92.00000

D2

Energy E(B3LYP) = -576.9395691 h, G<sup>298</sup> = -576.762671 h,  $\mu=15.2$  D

Cartesian coordinates, Å

| N  | atom | x         | y         | z         |
|----|------|-----------|-----------|-----------|
| 1  | C    | 2.068176  | 0.264287  | 0.142005  |
| 2  | C    | 3.048947  | 1.305163  | -0.040954 |
| 3  | C    | 2.488406  | -1.111015 | 0.089740  |
| 4  | C    | 4.361652  | 0.983508  | -0.256446 |
| 5  | C    | 3.804911  | -1.407527 | -0.125663 |
| 6  | C    | 4.736918  | -0.367049 | -0.298268 |
| 7  | H    | 2.727981  | 2.335826  | -0.002057 |
| 8  | H    | 1.774305  | -1.909061 | 0.216345  |
| 9  | H    | 5.103122  | 1.755281  | -0.392972 |
| 10 | H    | 4.135241  | -2.433796 | -0.167492 |
| 11 | H    | 5.774389  | -0.618756 | -0.469894 |
| 12 | C    | 0.777378  | 0.661758  | 0.354799  |
| 13 | H    | 0.572710  | 1.725258  | 0.378904  |
| 14 | C    | -0.391814 | -0.229896 | 0.589164  |
| 15 | H    | -0.238121 | -1.299569 | 0.481014  |
| 16 | C    | -1.670506 | 0.234557  | 0.139891  |
| 17 | H    | -1.819406 | 1.301267  | -0.011831 |
| 18 | C    | -2.791440 | -0.667320 | -0.077786 |
| 19 | H    | -2.780009 | -1.528326 | 0.598446  |
| 20 | C    | -4.151232 | -0.034269 | -0.151526 |
| 21 | O    | -4.210010 | 1.232242  | -0.160149 |
| 22 | H    | -5.116936 | 1.594493  | -0.221172 |
| 23 | H    | -0.642329 | -0.110043 | 1.694126  |
| 24 | H    | -2.579669 | -1.131175 | -1.066208 |
| 25 | O    | -5.224291 | -0.706996 | -0.217421 |
| 26 | H    | -5.125240 | -1.676553 | -0.206394 |

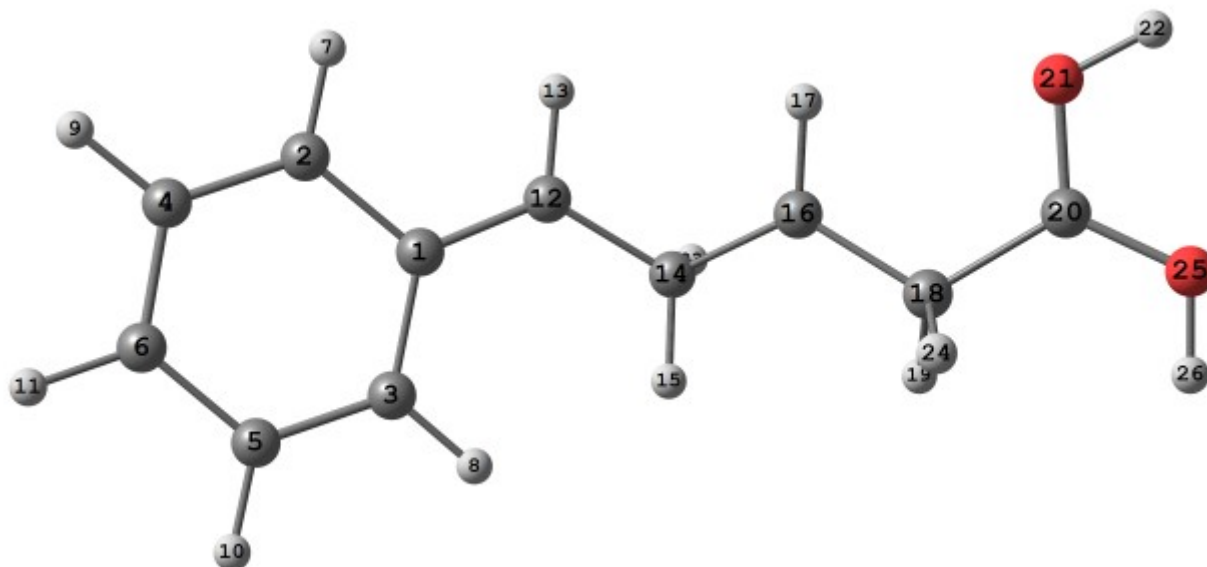

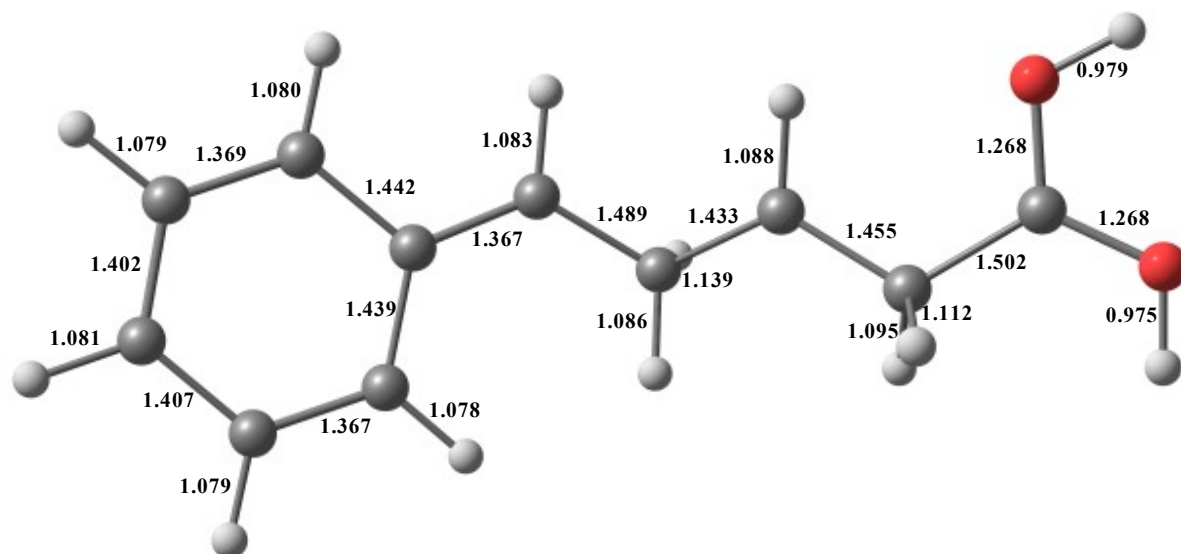

### Summary of Natural Population Analysis:

#### Natural Population

| Atom No | Natural Charge | Core    | Valence | Rydberg | Total   |
|---------|----------------|---------|---------|---------|---------|
| C 1     | -0.13385       | 1.99898 | 4.11536 | 0.01951 | 6.13385 |
| C 2     | -0.01834       | 1.99910 | 4.00101 | 0.01823 | 6.01834 |
| C 3     | -0.04790       | 1.99908 | 4.03183 | 0.01699 | 6.04790 |
| C 4     | -0.22521       | 1.99914 | 4.20601 | 0.02006 | 6.22521 |
| C 5     | -0.21435       | 1.99915 | 4.19508 | 0.02011 | 6.21435 |
| C 6     | 0.00827        | 1.99920 | 3.97397 | 0.01857 | 5.99173 |
| H 7     | 0.25346        | 0.00000 | 0.74489 | 0.00165 | 0.74654 |
| H 8     | 0.24518        | 0.00000 | 0.75300 | 0.00182 | 0.75482 |
| H 9     | 0.25746        | 0.00000 | 0.74097 | 0.00156 | 0.74254 |
| H 10    | 0.25681        | 0.00000 | 0.74164 | 0.00155 | 0.74319 |
| H 11    | 0.25028        | 0.00000 | 0.74847 | 0.00126 | 0.74972 |
| C 12    | 0.14507        | 1.99904 | 3.83814 | 0.01775 | 5.85493 |
| H 13    | 0.26668        | 0.00000 | 0.73147 | 0.00185 | 0.73332 |
| C 14    | -0.58405       | 1.99907 | 4.56217 | 0.02280 | 6.58405 |
| H 15    | 0.30921        | 0.00000 | 0.68910 | 0.00169 | 0.69079 |
| C 16    | 0.41502        | 1.99922 | 3.57024 | 0.01552 | 5.58498 |
| H 17    | 0.29005        | 0.00000 | 0.70744 | 0.00252 | 0.70995 |
| C 18    | -0.63303       | 1.99903 | 4.61416 | 0.01984 | 6.63303 |
| H 19    | 0.34684        | 0.00000 | 0.65131 | 0.00185 | 0.65316 |
| C 20    | 0.94179        | 1.99947 | 3.02783 | 0.03091 | 5.05821 |
| O 21    | -0.57720       | 1.99966 | 6.55186 | 0.02568 | 8.57720 |

|             |    |          |          |          |         |          |
|-------------|----|----------|----------|----------|---------|----------|
| H           | 22 | 0.59651  | 0.00000  | 0.40111  | 0.00239 | 0.40349  |
| H           | 23 | 0.42827  | 0.00000  | 0.56985  | 0.00188 | 0.57173  |
| H           | 24 | 0.39366  | 0.00000  | 0.60465  | 0.00169 | 0.60634  |
| O           | 25 | -0.56242 | 1.99965  | 6.53602  | 0.02675 | 8.56242  |
| H           | 26 | 0.59181  | 0.00000  | 0.40593  | 0.00225 | 0.40819  |
| <hr/> <hr/> |    |          |          |          |         |          |
| * Total *   |    | 3.00000  | 25.98980 | 65.71351 | 0.29669 | 92.00000 |



1h

Energy E(B3LYP) = -615.140510781 h,  $G^{298} = -614.972329$  h,  $\mu = 3.44$  D

Cartesian coordinates, Å

| N  | atom | x         | y         | z         |
|----|------|-----------|-----------|-----------|
| 1  | C    | -2.560522 | 0.233857  | 0.000603  |
| 2  | C    | -3.538368 | 1.241685  | -0.000705 |
| 3  | C    | -2.989582 | -1.105003 | 0.001427  |
| 4  | C    | -4.892389 | 0.929119  | -0.001429 |
| 5  | C    | -4.340840 | -1.415844 | 0.000743  |
| 6  | C    | -5.299210 | -0.401533 | -0.000742 |
| 7  | H    | -3.226356 | 2.277919  | -0.001205 |
| 8  | H    | -2.266155 | -1.907746 | 0.002784  |
| 9  | H    | -5.627415 | 1.722128  | -0.002488 |
| 10 | H    | -4.651488 | -2.451639 | 0.001444  |
| 11 | H    | -6.351613 | -0.649327 | -0.001259 |
| 12 | C    | -1.154470 | 0.624845  | 0.001057  |
| 13 | H    | -0.976616 | 1.695305  | 0.002396  |
| 14 | C    | -0.075631 | -0.186233 | -0.000238 |
| 15 | H    | -0.193536 | -1.263043 | -0.001873 |
| 16 | C    | 1.268955  | 0.322415  | 0.000357  |
| 17 | H    | 1.394702  | 1.399664  | 0.001771  |
| 18 | C    | 2.374687  | -0.446616 | -0.000709 |
| 19 | H    | 2.310191  | -1.525797 | -0.002080 |
| 20 | C    | 3.718053  | 0.141395  | 0.000014  |
| 21 | O    | 3.982819  | 1.330413  | 0.001392  |
| 22 | O    | 4.667297  | -0.819652 | -0.001073 |
| 23 | C    | 6.034911  | -0.366397 | -0.000519 |
| 24 | H    | 6.237574  | 0.228068  | -0.888328 |
| 25 | H    | 6.237669  | 0.225563  | 0.888944  |
| 26 | H    | 6.638550  | -1.267300 | -0.001818 |

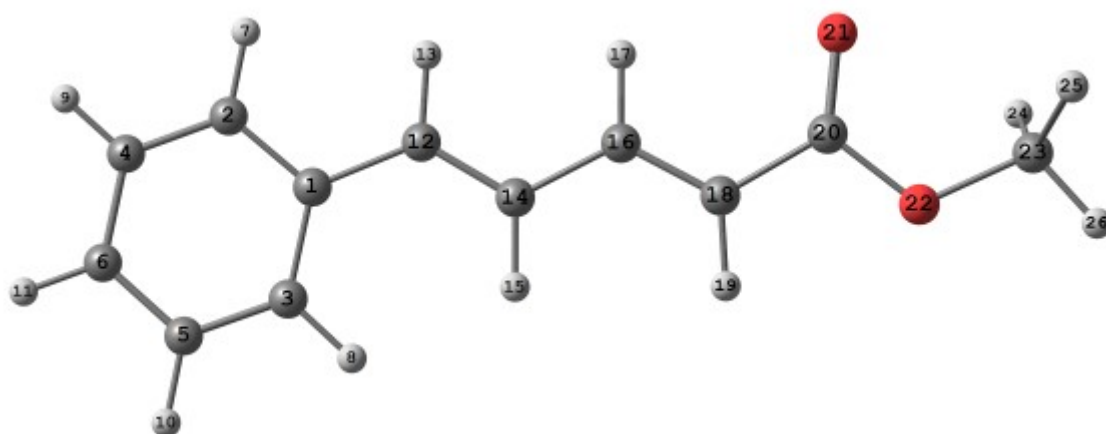

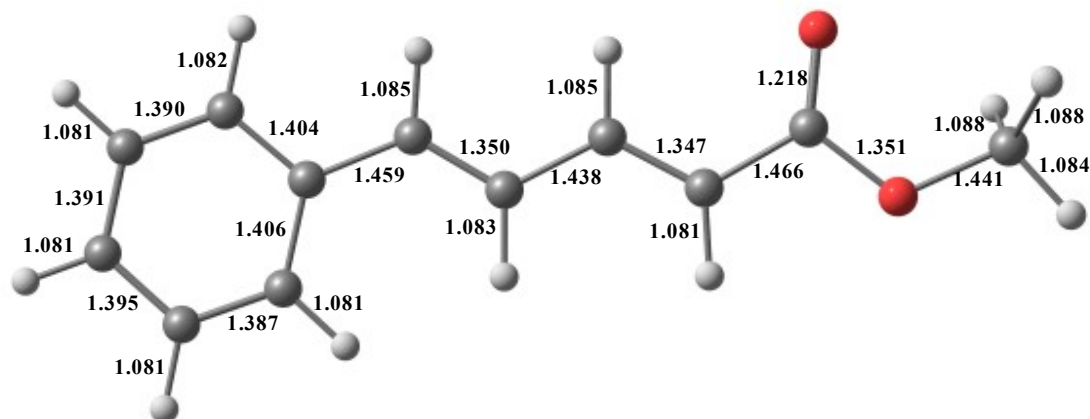

### Summary of Natural Population Analysis:

#### Natural Population

| Atom | No | Natural Charge | Core    | Valence | Rydberg | Total   |
|------|----|----------------|---------|---------|---------|---------|
| C    | 1  | -0.11035       | 1.99903 | 4.09125 | 0.02008 | 6.11035 |
| C    | 2  | -0.16911       | 1.99891 | 4.15029 | 0.01991 | 6.16911 |
| C    | 3  | -0.17350       | 1.99892 | 4.15585 | 0.01874 | 6.17350 |
| C    | 4  | -0.22034       | 1.99917 | 4.19988 | 0.02129 | 6.22034 |
| C    | 5  | -0.21587       | 1.99918 | 4.19551 | 0.02119 | 6.21587 |
| C    | 6  | -0.19979       | 1.99916 | 4.18104 | 0.01959 | 6.19979 |
| H    | 7  | 0.22087        | 0.00000 | 0.77743 | 0.00169 | 0.77913 |
| H    | 8  | 0.21948        | 0.00000 | 0.77880 | 0.00172 | 0.78052 |
| H    | 9  | 0.22322        | 0.00000 | 0.77513 | 0.00165 | 0.77678 |
| H    | 10 | 0.22259        | 0.00000 | 0.77577 | 0.00164 | 0.77741 |
| H    | 11 | 0.22197        | 0.00000 | 0.77644 | 0.00159 | 0.77803 |
| C    | 12 | -0.13211       | 1.99906 | 4.11427 | 0.01879 | 6.13211 |
| H    | 13 | 0.21357        | 0.00000 | 0.78342 | 0.00300 | 0.78643 |
| C    | 14 | -0.23027       | 1.99905 | 4.21274 | 0.01848 | 6.23027 |
| H    | 15 | 0.21427        | 0.00000 | 0.78245 | 0.00328 | 0.78573 |
| C    | 16 | -0.12265       | 1.99909 | 4.10366 | 0.01990 | 6.12265 |
| H    | 17 | 0.22275        | 0.00000 | 0.77489 | 0.00236 | 0.77725 |
| C    | 18 | -0.32389       | 1.99897 | 4.30289 | 0.02202 | 6.32389 |
| H    | 19 | 0.22755        | 0.00000 | 0.77003 | 0.00241 | 0.77245 |
| C    | 20 | 0.78887        | 1.99933 | 3.17104 | 0.04077 | 5.21113 |
| O    | 21 | -0.67881       | 1.99974 | 6.65313 | 0.02594 | 8.67881 |

|   |    |          |         |         |         |         |
|---|----|----------|---------|---------|---------|---------|
| O | 22 | -0.55311 | 1.99973 | 6.53673 | 0.01665 | 8.55311 |
| C | 23 | -0.21467 | 1.99923 | 4.20079 | 0.01465 | 6.21467 |
| H | 24 | 0.18830  | 0.00000 | 0.80982 | 0.00188 | 0.81170 |
| H | 25 | 0.18831  | 0.00000 | 0.80981 | 0.00188 | 0.81169 |
| H | 26 | 0.19271  | 0.00000 | 0.80597 | 0.00132 | 0.80729 |

---

\* Total \*    0.00000    27.98855    71.68902    0.32243    100.00000

### A3

Energy E(B3LYP) = -615.55173014 h,  $G^{298}$  = -615.37141 h,  $\mu=12.4$  D

### Cartesian coordinates, Å

| N  | atom | x         | y         | z         |
|----|------|-----------|-----------|-----------|
| 1  | C    | 2.583973  | 0.220839  | 0.000032  |
| 2  | C    | 3.537288  | 1.255506  | 0.000005  |
| 3  | C    | 3.038480  | -1.112070 | 0.000057  |
| 4  | C    | 4.895296  | 0.972094  | -0.000018 |
| 5  | C    | 4.394293  | -1.391000 | 0.000039  |
| 6  | C    | 5.326785  | -0.351597 | -0.000004 |
| 7  | H    | 3.199756  | 2.283248  | 0.000000  |
| 8  | H    | 2.331938  | -1.929040 | 0.000106  |
| 9  | H    | 5.615045  | 1.778306  | -0.000042 |
| 10 | H    | 4.731235  | -2.417977 | 0.000061  |
| 11 | H    | 6.384303  | -0.576071 | -0.000019 |
| 12 | C    | 1.182124  | 0.579083  | 0.000030  |
| 13 | H    | 0.977827  | 1.644315  | 0.000123  |
| 14 | C    | 0.110156  | -0.259369 | -0.000084 |
| 15 | H    | 0.239304  | -1.333364 | -0.000195 |
| 16 | C    | -1.211346 | 0.249811  | -0.000055 |
| 17 | H    | -1.328694 | 1.326733  | 0.000015  |
| 18 | C    | -2.334105 | -0.531268 | -0.000094 |
| 19 | H    | -2.277970 | -1.608938 | -0.000141 |
| 20 | C    | -3.631511 | 0.018320  | -0.000037 |
| 21 | O    | -3.793949 | 1.315699  | 0.000025  |
| 22 | H    | -4.718990 | 1.600696  | -0.000096 |
| 23 | O    | -4.633957 | -0.807375 | -0.000035 |
| 24 | C    | -6.010201 | -0.331841 | 0.000107  |
| 25 | H    | -6.203707 | 0.243106  | 0.902470  |
| 26 | H    | -6.203816 | 0.243443  | -0.902022 |
| 27 | H    | -6.610369 | -1.232109 | -0.000047 |

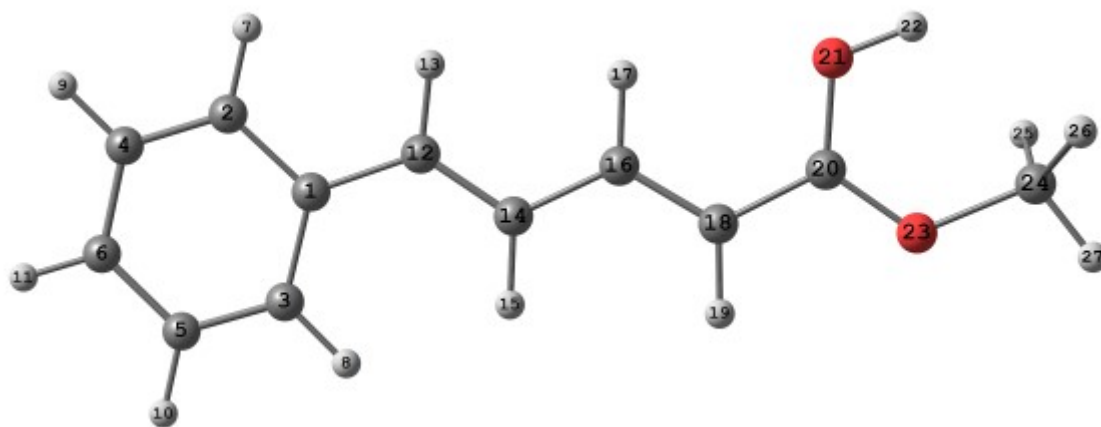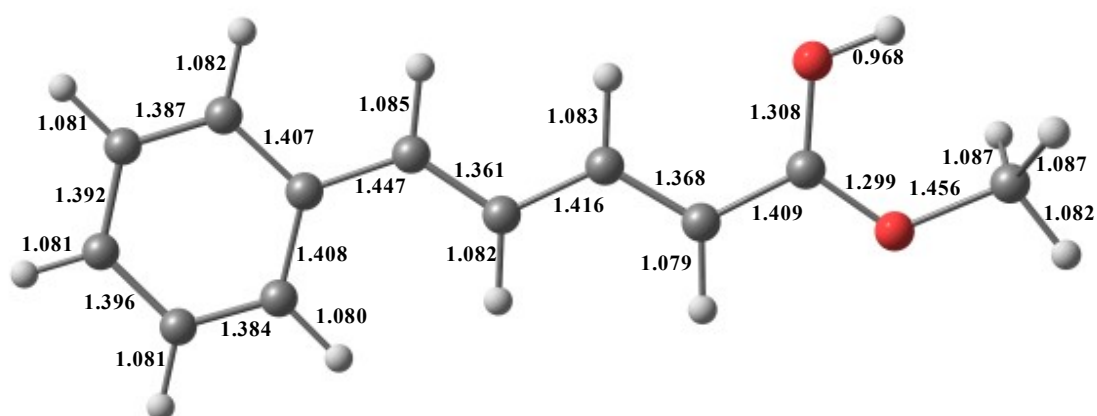

### Summary of Natural Population Analysis:

#### Natural Population

| Atom No | Charge   | Core    | Valence | Rydberg | Total   |
|---------|----------|---------|---------|---------|---------|
| C 1     | -0.12179 | 1.99901 | 4.10270 | 0.02008 | 6.12179 |
| C 2     | -0.14247 | 1.99891 | 4.12334 | 0.02021 | 6.14247 |
| C 3     | -0.15915 | 1.99907 | 4.14262 | 0.01745 | 6.15915 |
| C 4     | -0.22071 | 1.99917 | 4.20032 | 0.02122 | 6.22071 |
| C 5     | -0.20961 | 1.99916 | 4.19017 | 0.02028 | 6.20961 |
| C 6     | -0.17312 | 1.99916 | 4.15439 | 0.01956 | 6.17312 |
| H 7     | 0.22591  | 0.00000 | 0.77240 | 0.00169 | 0.77409 |
| H 8     | 0.22486  | 0.00000 | 0.77341 | 0.00173 | 0.77514 |

|   |    |          |         |         |         |         |
|---|----|----------|---------|---------|---------|---------|
| H | 9  | 0.22817  | 0.00000 | 0.77021 | 0.00162 | 0.77183 |
| H | 10 | 0.22751  | 0.00000 | 0.77081 | 0.00168 | 0.77249 |
| H | 11 | 0.22669  | 0.00000 | 0.77180 | 0.00151 | 0.77331 |
| C | 12 | -0.05243 | 1.99909 | 4.03472 | 0.01862 | 6.05243 |
| H | 13 | 0.22476  | 0.00000 | 0.77329 | 0.00195 | 0.77524 |
| C | 14 | -0.25685 | 1.99906 | 4.23848 | 0.01931 | 6.25685 |
| H | 15 | 0.22785  | 0.00000 | 0.76875 | 0.00340 | 0.77215 |
| C | 16 | -0.04789 | 1.99912 | 4.02977 | 0.01899 | 6.04789 |
| H | 17 | 0.23477  | 0.00000 | 0.76303 | 0.00220 | 0.76523 |
| C | 18 | -0.34999 | 1.99901 | 4.32914 | 0.02184 | 6.34999 |
| H | 19 | 0.25483  | 0.00000 | 0.74307 | 0.00210 | 0.74517 |
| C | 20 | 0.82974  | 1.99914 | 3.14244 | 0.02868 | 5.17026 |
| O | 21 | -0.63053 | 1.99969 | 6.60573 | 0.02510 | 8.63053 |
| H | 22 | 0.53935  | 0.00000 | 0.45786 | 0.00279 | 0.46065 |
| O | 23 | -0.47754 | 1.99966 | 6.45383 | 0.02406 | 8.47754 |
| C | 24 | -0.24246 | 1.99919 | 4.23012 | 0.01315 | 6.24246 |
| H | 25 | 0.20669  | 0.00000 | 0.79157 | 0.00175 | 0.79331 |
| H | 26 | 0.20673  | 0.00000 | 0.79152 | 0.00175 | 0.79327 |
| H | 27 | 0.22668  | 0.00000 | 0.77214 | 0.00117 | 0.77332 |

---

\* Total \*    1.00000    27.98845    71.69765    0.31390    100.00000

### C3

Energy E(B3LYP) = -615.938562877 h,  $G^{298}$  = -615.745345 h,  $\mu=12.4$  D

### Cartesian coordinates, Å

| N  | atom | x         | y         | z         |
|----|------|-----------|-----------|-----------|
| 1  | C    | -2.559939 | 0.223504  | 0.073139  |
| 2  | C    | -3.531153 | 1.263933  | 0.059921  |
| 3  | C    | -2.984592 | -1.122427 | -0.113282 |
| 4  | C    | -4.863012 | 0.971354  | -0.130959 |
| 5  | C    | -4.317554 | -1.400428 | -0.303379 |
| 6  | C    | -5.254415 | -0.357971 | -0.312255 |
| 7  | H    | -3.207498 | 2.285213  | 0.201879  |
| 8  | H    | -2.265809 | -1.927067 | -0.106036 |
| 9  | H    | -5.600514 | 1.759618  | -0.140879 |
| 10 | H    | -4.645658 | -2.419073 | -0.445649 |
| 11 | H    | -6.300053 | -0.587996 | -0.461854 |
| 12 | C    | -1.220172 | 0.583372  | 0.271642  |
| 13 | H    | -1.021124 | 1.640718  | 0.403376  |
| 14 | C    | -0.097123 | -0.272865 | 0.318218  |
| 15 | H    | -0.212070 | -1.339213 | 0.189886  |
| 16 | C    | 1.128811  | 0.260370  | 0.529350  |
| 17 | H    | 1.226439  | 1.331085  | 0.654362  |
| 18 | C    | 2.364588  | -0.561152 | 0.659024  |
| 19 | H    | 2.246100  | -1.573290 | 0.273732  |
| 20 | C    | 3.591440  | 0.027248  | 0.046274  |
| 21 | O    | 3.526796  | 1.221794  | -0.414159 |
| 22 | H    | 4.351465  | 1.573281  | -0.793815 |
| 23 | H    | 2.597165  | -0.677653 | 1.727502  |
| 24 | O    | 4.625850  | -0.703687 | 0.032641  |
| 25 | C    | 5.910843  | -0.237269 | -0.521527 |

|    |   |          |           |           |
|----|---|----------|-----------|-----------|
| 26 | H | 5.782893 | -0.036039 | -1.580713 |
| 27 | H | 6.240604 | 0.631100  | 0.040673  |
| 28 | H | 6.580550 | -1.071560 | -0.367313 |

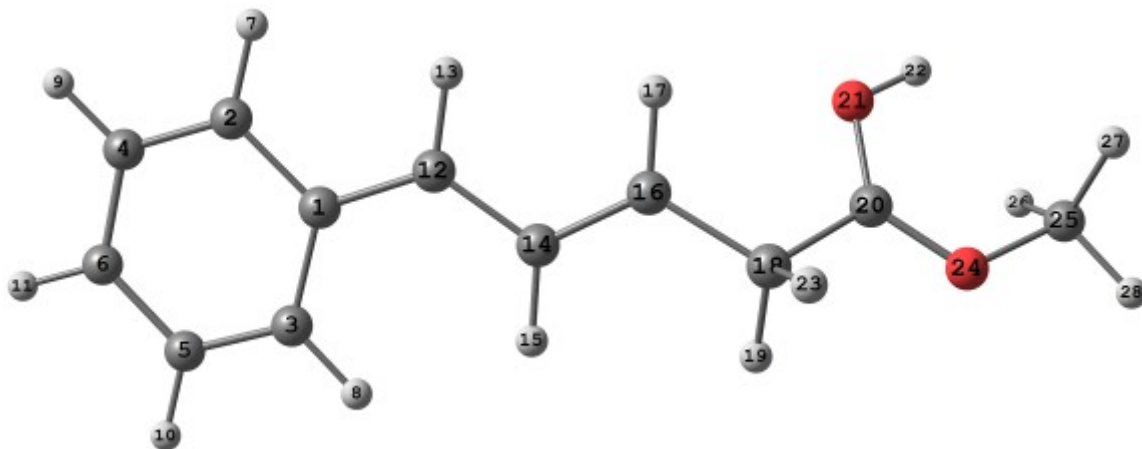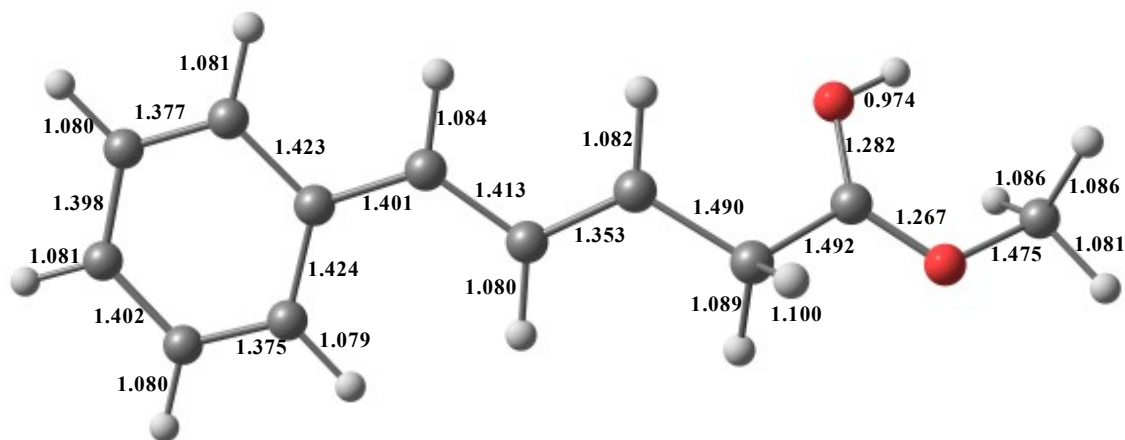

### Summary of Natural Population Analysis:

#### Natural Population

| Atom | No | Charge   | Core    | Valence | Rydberg | Total   |
|------|----|----------|---------|---------|---------|---------|
| C    | 1  | -0.14227 | 1.99901 | 4.12367 | 0.01960 | 6.14227 |
| C    | 2  | -0.07530 | 1.99910 | 4.05788 | 0.01832 | 6.07530 |
| C    | 3  | -0.08930 | 1.99908 | 4.07294 | 0.01728 | 6.08930 |

|   |    |          |         |         |         |         |
|---|----|----------|---------|---------|---------|---------|
| C | 4  | -0.21955 | 1.99915 | 4.20039 | 0.02002 | 6.21955 |
| C | 5  | -0.21331 | 1.99916 | 4.19424 | 0.01992 | 6.21331 |
| C | 6  | -0.07584 | 1.99918 | 4.05762 | 0.01903 | 6.07584 |
| H | 7  | 0.24336  | 0.00000 | 0.75498 | 0.00165 | 0.75664 |
| H | 8  | 0.23988  | 0.00000 | 0.75844 | 0.00168 | 0.76012 |
| H | 9  | 0.24518  | 0.00000 | 0.75322 | 0.00160 | 0.75482 |
| H | 10 | 0.24455  | 0.00000 | 0.75386 | 0.00159 | 0.75545 |
| H | 11 | 0.24136  | 0.00000 | 0.75730 | 0.00134 | 0.75864 |
| C | 12 | 0.09931  | 1.99911 | 3.88305 | 0.01854 | 5.90069 |
| H | 13 | 0.24444  | 0.00000 | 0.75369 | 0.00187 | 0.75556 |
| C | 14 | -0.26309 | 1.99902 | 4.24453 | 0.01954 | 6.26309 |
| H | 15 | 0.24868  | 0.00000 | 0.74817 | 0.00314 | 0.75132 |
| C | 16 | 0.03950  | 1.99913 | 3.94360 | 0.01778 | 5.96050 |
| H | 17 | 0.24585  | 0.00000 | 0.75210 | 0.00206 | 0.75415 |
| C | 18 | -0.54557 | 1.99911 | 4.52608 | 0.02039 | 6.54557 |
| H | 19 | 0.29274  | 0.00000 | 0.70523 | 0.00203 | 0.70726 |
| C | 20 | 0.94316  | 1.99934 | 3.02757 | 0.02993 | 5.05684 |
| O | 21 | -0.58452 | 1.99967 | 6.55911 | 0.02574 | 8.58452 |
| H | 22 | 0.56153  | 0.00000 | 0.43584 | 0.00263 | 0.43847 |
| H | 23 | 0.32031  | 0.00000 | 0.67781 | 0.00188 | 0.67969 |
| O | 24 | -0.43438 | 1.99962 | 6.41106 | 0.02371 | 8.43438 |
| C | 25 | -0.23907 | 1.99919 | 4.22532 | 0.01456 | 6.23907 |
| H | 26 | 0.21897  | 0.00000 | 0.77970 | 0.00133 | 0.78103 |
| H | 27 | 0.21812  | 0.00000 | 0.78053 | 0.00135 | 0.78188 |
| H | 28 | 0.23527  | 0.00000 | 0.76374 | 0.00098 | 0.76473 |

---

\* Total \*    2.00000    27.98884    71.70164    0.30951    100.00000

### B3

Energy E(B3LYP) = -615.928314647 h,  $G^{298}$  = -615.736402 h,  $\mu=6.27$  D

### Cartesian coordinates, Å

| N  | atom | x         | y         | z         |
|----|------|-----------|-----------|-----------|
| 1  | C    | 5.071858  | -0.478818 | -0.562919 |
| 2  | C    | 4.693784  | 0.860199  | -0.711958 |
| 3  | C    | 3.419551  | 1.240101  | -0.368034 |
| 4  | C    | 2.490323  | 0.274765  | 0.137578  |
| 5  | C    | 2.904984  | -1.087885 | 0.272031  |
| 6  | C    | 4.182128  | -1.448213 | -0.072769 |
| 7  | C    | 1.231419  | 0.720395  | 0.487831  |
| 8  | C    | 0.135777  | -0.065267 | 1.093642  |
| 9  | C    | -1.228588 | 0.396674  | 0.687830  |
| 10 | C    | -2.201623 | -0.444346 | 0.320271  |
| 11 | C    | -3.516981 | 0.027055  | -0.030413 |
| 12 | O    | -4.369109 | -0.861072 | -0.383808 |
| 13 | C    | -5.740250 | -0.513129 | -0.767072 |
| 14 | O    | -3.774364 | 1.292532  | 0.024809  |
| 15 | H    | 3.101975  | 2.267936  | -0.469355 |
| 16 | H    | 2.217340  | -1.831742 | 0.642353  |
| 17 | H    | 5.399244  | 1.582646  | -1.092763 |
| 18 | H    | 4.506228  | -2.472984 | 0.025630  |
| 19 | H    | 6.074901  | -0.776984 | -0.835072 |

|    |   |           |           |           |
|----|---|-----------|-----------|-----------|
| 20 | H | 1.032770  | 1.776702  | 0.339976  |
| 21 | H | 0.256800  | -1.137744 | 0.980134  |
| 22 | H | -1.418751 | 1.461951  | 0.722646  |
| 23 | H | -2.063805 | -1.513325 | 0.263086  |
| 24 | H | -4.679799 | 1.540170  | -0.222385 |
| 25 | H | 0.225510  | 0.145681  | 2.176078  |
| 26 | H | -6.254402 | -0.089380 | 0.090881  |
| 27 | H | -5.717703 | 0.163253  | -1.617238 |
| 28 | H | -6.186815 | -1.457041 | -1.048081 |

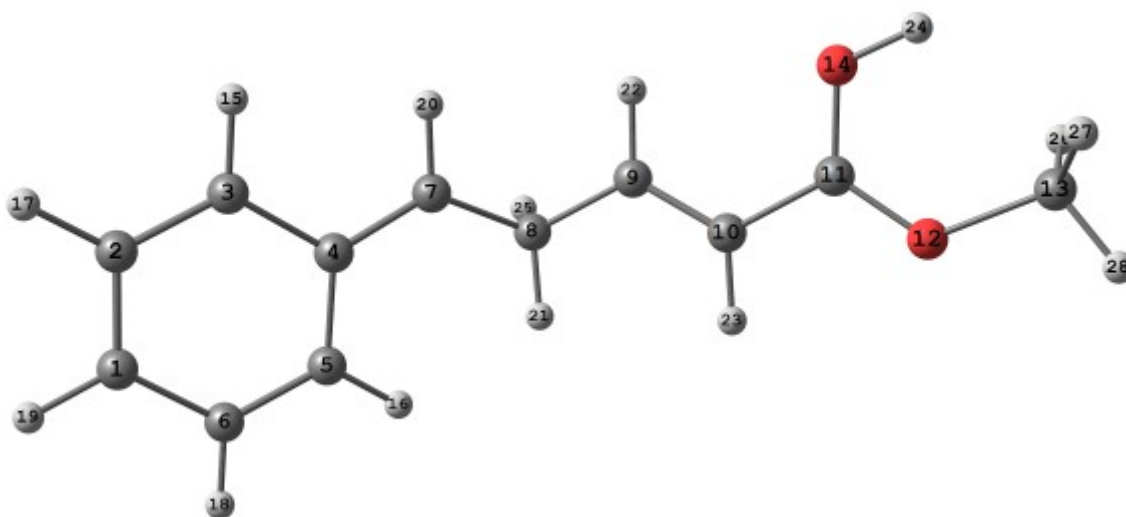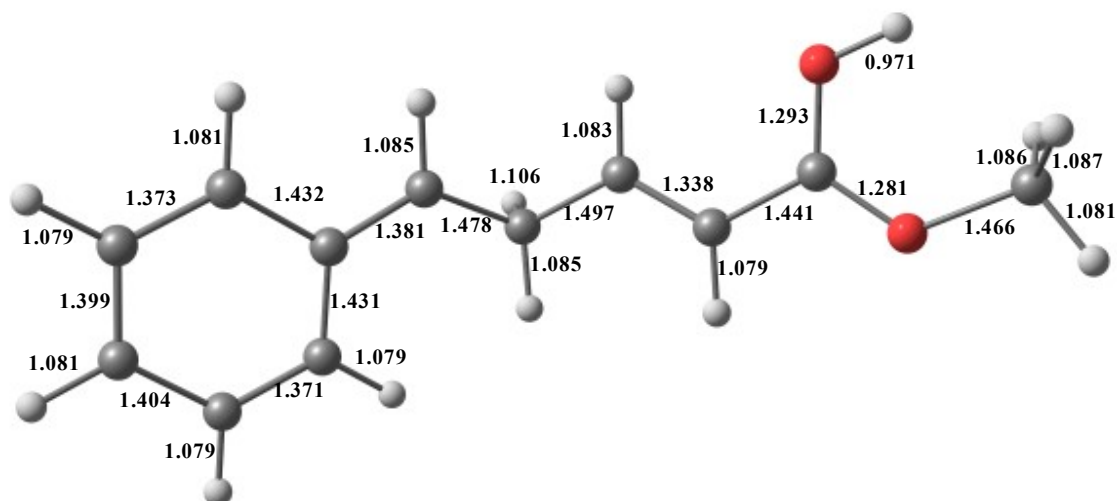



### Summary of Natural Population Analysis:

#### Natural Population

| Natural |    | -----    |         |         |         |         |
|---------|----|----------|---------|---------|---------|---------|
| Atom    | No | Charge   | Core    | Valence | Rydberg | Total   |
| C       | 1  | -0.03421 | 1.99919 | 4.01623 | 0.01879 | 6.03421 |
| C       | 2  | -0.22833 | 1.99914 | 4.20911 | 0.02008 | 6.22833 |
| C       | 3  | -0.03906 | 1.99910 | 4.02156 | 0.01840 | 6.03906 |
| C       | 4  | -0.16895 | 1.99898 | 4.15033 | 0.01965 | 6.16895 |
| C       | 5  | -0.05870 | 1.99908 | 4.04240 | 0.01721 | 6.05870 |
| C       | 6  | -0.21831 | 1.99915 | 4.19917 | 0.01999 | 6.21831 |
| C       | 7  | 0.20592  | 1.99909 | 3.77889 | 0.01611 | 5.79408 |
| C       | 8  | -0.52499 | 1.99916 | 4.50632 | 0.01951 | 6.52499 |
| C       | 9  | 0.01969  | 1.99909 | 3.96370 | 0.01751 | 5.98031 |
| C       | 10 | -0.33063 | 1.99894 | 4.31045 | 0.02124 | 6.33063 |
| C       | 11 | 0.87402  | 1.99924 | 3.09755 | 0.02920 | 5.12598 |
| O       | 12 | -0.44039 | 1.99964 | 6.41657 | 0.02418 | 8.44039 |
| C       | 13 | -0.24184 | 1.99918 | 4.23011 | 0.01255 | 6.24184 |
| O       | 14 | -0.60230 | 1.99968 | 6.57724 | 0.02538 | 8.60230 |
| H       | 15 | 0.24843  | 0.00000 | 0.74989 | 0.00167 | 0.75157 |
| H       | 16 | 0.24211  | 0.00000 | 0.75617 | 0.00172 | 0.75789 |
| H       | 17 | 0.25150  | 0.00000 | 0.74691 | 0.00159 | 0.74850 |
| H       | 18 | 0.25069  | 0.00000 | 0.74773 | 0.00158 | 0.74931 |
| H       | 19 | 0.24578  | 0.00000 | 0.75292 | 0.00129 | 0.75422 |
| H       | 20 | 0.24647  | 0.00000 | 0.75163 | 0.00190 | 0.75353 |
| H       | 21 | 0.25582  | 0.00000 | 0.74137 | 0.00281 | 0.74418 |
| H       | 22 | 0.24563  | 0.00000 | 0.75229 | 0.00208 | 0.75437 |
| H       | 23 | 0.26871  | 0.00000 | 0.72921 | 0.00208 | 0.73129 |
| H       | 24 | 0.55210  | 0.00000 | 0.44522 | 0.00268 | 0.44790 |
| H       | 25 | 0.32084  | 0.00000 | 0.67745 | 0.00172 | 0.67916 |
| H       | 26 | 0.21519  | 0.00000 | 0.78322 | 0.00160 | 0.78481 |
| H       | 27 | 0.21304  | 0.00000 | 0.78528 | 0.00168 | 0.78696 |
| H       | 28 | 0.23174  | 0.00000 | 0.76712 | 0.00114 | 0.76826 |

\* Total \*    2.00000    27.98867    71.70600    0.30533    100

### D3

Energy E(B3LYP) = -616.256187541 h, G<sup>298</sup> = -616.054029 h,  $\mu=12.0$  D

### Cartesian coordinates, Å

| N  | atom | x        | y         | z         |
|----|------|----------|-----------|-----------|
| 1  | C    | 2.596594 | 0.256321  | 0.151587  |
| 2  | C    | 3.593561 | 1.284892  | -0.006628 |
| 3  | C    | 2.994678 | -1.123578 | 0.067731  |
| 4  | C    | 4.900974 | 0.947079  | -0.231350 |
| 5  | C    | 4.307002 | -1.436650 | -0.151093 |
| 6  | C    | 5.255296 | -0.407807 | -0.301534 |
| 7  | H    | 3.289429 | 2.319559  | 0.055203  |
| 8  | H    | 2.267440 | -1.912440 | 0.176092  |
| 9  | H    | 5.654325 | 1.709851  | -0.352718 |
| 10 | H    | 4.620936 | -2.467058 | -0.213258 |
| 11 | H    | 6.288766 | -0.672181 | -0.478186 |

|    |   |           |           |           |
|----|---|-----------|-----------|-----------|
| 12 | C | 1.310858  | 0.666857  | 0.373812  |
| 13 | H | 1.122485  | 1.732379  | 0.430554  |
| 14 | C | 0.129136  | -0.216263 | 0.572767  |
| 15 | H | 0.266370  | -1.279610 | 0.398915  |
| 16 | C | -1.145670 | 0.290025  | 0.148342  |
| 17 | H | -1.280226 | 1.365508  | 0.056772  |
| 18 | C | -2.267543 | -0.578476 | -0.141237 |
| 19 | H | -2.255244 | -1.523662 | 0.404925  |
| 20 | C | -3.635709 | 0.043638  | -0.137189 |
| 21 | O | -3.700756 | 1.314449  | -0.234901 |
| 22 | H | -4.594173 | 1.703948  | -0.256431 |
| 23 | H | -0.109564 | -0.159255 | 1.681502  |
| 24 | H | -2.056253 | -0.891072 | -1.191271 |
| 25 | O | -4.597747 | -0.761322 | -0.052058 |
| 26 | C | -6.015786 | -0.323704 | -0.054812 |
| 27 | H | -6.180213 | 0.301263  | 0.816795  |
| 28 | H | -6.218532 | 0.183558  | -0.992880 |
| 29 | H | -6.567861 | -1.249795 | 0.017289  |

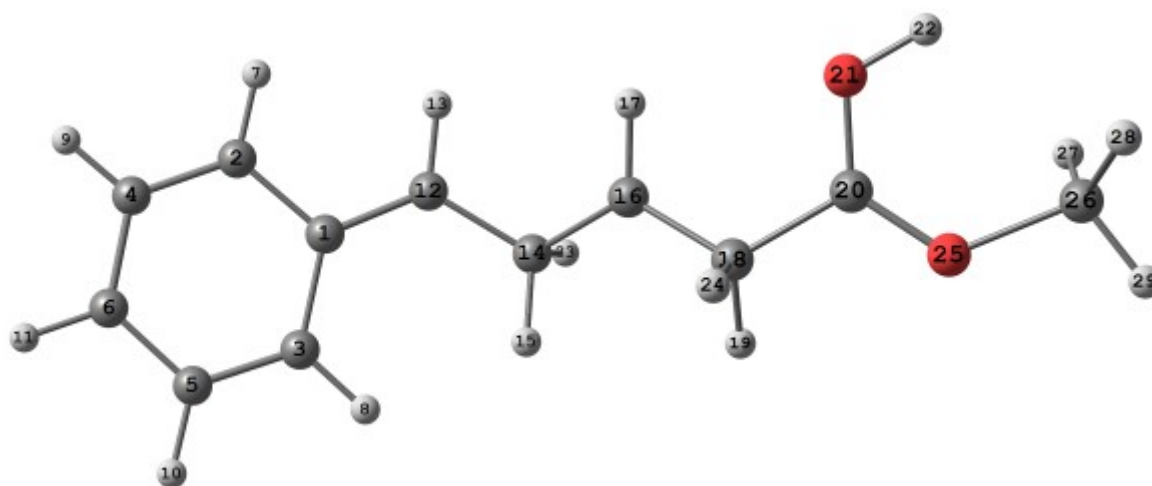

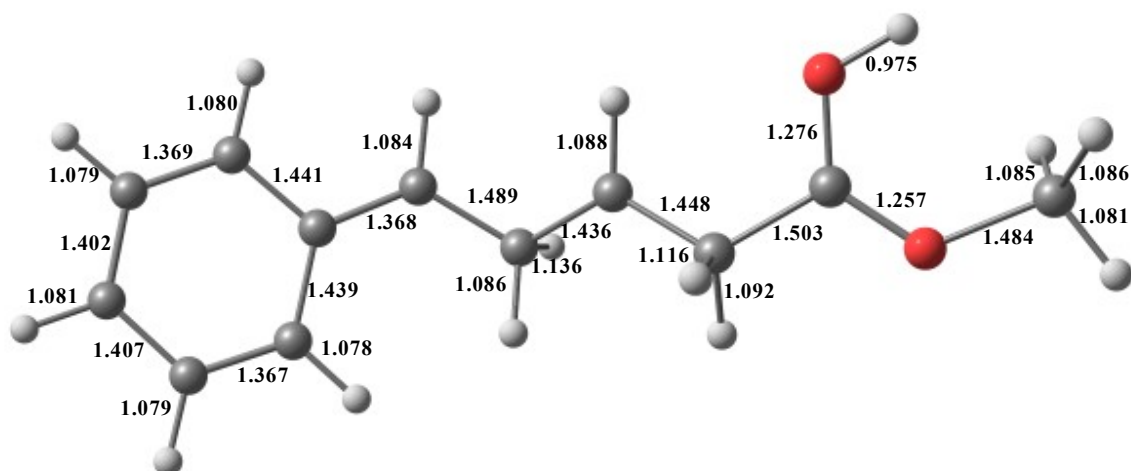

### Summary of Natural Population Analysis:

#### Natural Population

| Atom | No | Natural Charge | Core    | Valence | Rydberg | Total   |
|------|----|----------------|---------|---------|---------|---------|
| C    | 1  | -0.13537       | 1.99898 | 4.11689 | 0.01950 | 6.13537 |
| C    | 2  | -0.01970       | 1.99910 | 4.00237 | 0.01823 | 6.01970 |
| C    | 3  | -0.04910       | 1.99908 | 4.03303 | 0.01699 | 6.04910 |
| C    | 4  | -0.22498       | 1.99914 | 4.20578 | 0.02006 | 6.22498 |
| C    | 5  | -0.21420       | 1.99915 | 4.19493 | 0.02012 | 6.21420 |
| C    | 6  | 0.00766        | 1.99920 | 3.97456 | 0.01857 | 5.99234 |
| H    | 7  | 0.25348        | 0.00000 | 0.74487 | 0.00165 | 0.74652 |
| H    | 8  | 0.24512        | 0.00000 | 0.75306 | 0.00182 | 0.75488 |
| H    | 9  | 0.25729        | 0.00000 | 0.74115 | 0.00156 | 0.74271 |
| H    | 10 | 0.25671        | 0.00000 | 0.74175 | 0.00155 | 0.74329 |
| H    | 11 | 0.25007        | 0.00000 | 0.74867 | 0.00126 | 0.74993 |
| C    | 12 | 0.14740        | 1.99904 | 3.83587 | 0.01769 | 5.85260 |
| H    | 13 | 0.26638        | 0.00000 | 0.73176 | 0.00186 | 0.73362 |
| C    | 14 | -0.58468       | 1.99908 | 4.56309 | 0.02252 | 6.58468 |
| H    | 15 | 0.30795        | 0.00000 | 0.69033 | 0.00171 | 0.69205 |
| C    | 16 | 0.41477        | 1.99922 | 3.57096 | 0.01505 | 5.58523 |
| H    | 17 | 0.28805        | 0.00000 | 0.70948 | 0.00248 | 0.71195 |
| C    | 18 | -0.61495       | 1.99903 | 4.59332 | 0.02260 | 6.61495 |
| H    | 19 | 0.34046        | 0.00000 | 0.65756 | 0.00199 | 0.65954 |
| C    | 20 | 0.94653        | 1.99936 | 3.02394 | 0.03017 | 5.05347 |
| O    | 21 | -0.57701       | 1.99966 | 6.55201 | 0.02534 | 8.57701 |

|           |    |          |          |          |         |           |
|-----------|----|----------|----------|----------|---------|-----------|
| H         | 22 | 0.57550  | 0.00000  | 0.42198  | 0.00251 | 0.42450   |
| H         | 23 | 0.42379  | 0.00000  | 0.57434  | 0.00186 | 0.57621   |
| H         | 24 | 0.39925  | 0.00000  | 0.59891  | 0.00184 | 0.60075   |
| O         | 25 | -0.41573 | 1.99961  | 6.39278  | 0.02335 | 8.41573   |
| C         | 26 | -0.23146 | 1.99918  | 4.21826  | 0.01402 | 6.23146   |
| H         | 27 | 0.22437  | 0.00000  | 0.77435  | 0.00128 | 0.77563   |
| H         | 28 | 0.22380  | 0.00000  | 0.77490  | 0.00130 | 0.77620   |
| H         | 29 | 0.23862  | 0.00000  | 0.76040  | 0.00098 | 0.76138   |
| <hr/>     |    |          |          |          |         |           |
| <hr/>     |    |          |          |          |         |           |
| * Total * |    | 3.00000  | 27.98884 | 71.70129 | 0.30987 | 100.00000 |

li

Energy E(B3LYP) = -539.883472016 h,  $G^{298} = -539.719898$  h,  $\mu=5.42$  D

Cartesian coordinates, Å

| N  | atom | x         | y         | z         |
|----|------|-----------|-----------|-----------|
| 1  | C    | -2.035295 | -0.237568 | 0.000180  |
| 2  | C    | -3.005871 | -1.252680 | -0.000228 |
| 3  | C    | -2.474164 | 1.098311  | 0.000446  |
| 4  | C    | -4.362031 | -0.949907 | -0.000436 |
| 5  | C    | -3.827583 | 1.399238  | 0.000245  |
| 6  | C    | -4.778464 | 0.377838  | -0.000208 |
| 7  | H    | -2.686260 | -2.286587 | -0.000396 |
| 8  | H    | -1.756571 | 1.906234  | 0.000867  |
| 9  | H    | -5.091348 | -1.748154 | -0.000765 |
| 10 | H    | -4.145876 | 2.432695  | 0.000467  |
| 11 | H    | -5.832645 | 0.617929  | -0.000357 |
| 12 | C    | -0.626985 | -0.617961 | 0.000297  |
| 13 | H    | -0.440884 | -1.687006 | 0.000693  |
| 14 | C    | 0.446783  | 0.201445  | -0.000074 |
| 15 | H    | 0.320266  | 1.277369  | -0.000546 |
| 16 | C    | 1.793633  | -0.296471 | 0.000109  |
| 17 | H    | 1.927224  | -1.373150 | 0.000537  |
| 18 | C    | 2.899026  | 0.478040  | -0.000235 |
| 19 | H    | 2.807962  | 1.557172  | -0.000665 |
| 20 | C    | 4.259072  | -0.085325 | -0.000041 |
| 21 | O    | 4.474132  | -1.294665 | 0.000413  |
| 22 | C    | 5.395404  | 0.910008  | -0.000371 |
| 23 | H    | 5.326152  | 1.557652  | 0.876026  |
| 24 | H    | 6.352086  | 0.395612  | -0.000625 |
| 25 | H    | 5.325675  | 1.557754  | -0.876643 |

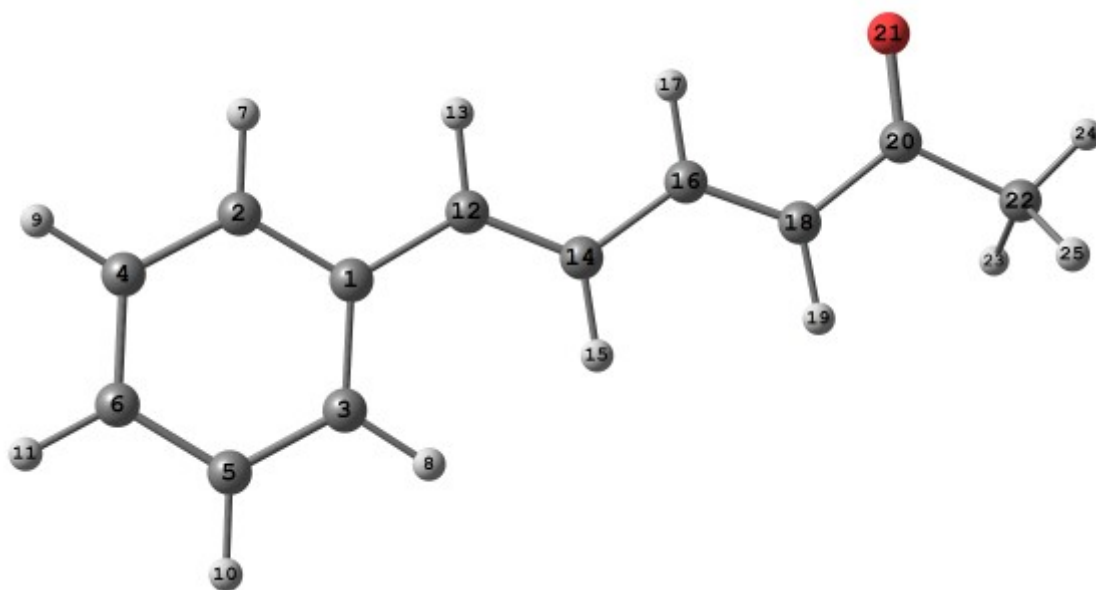

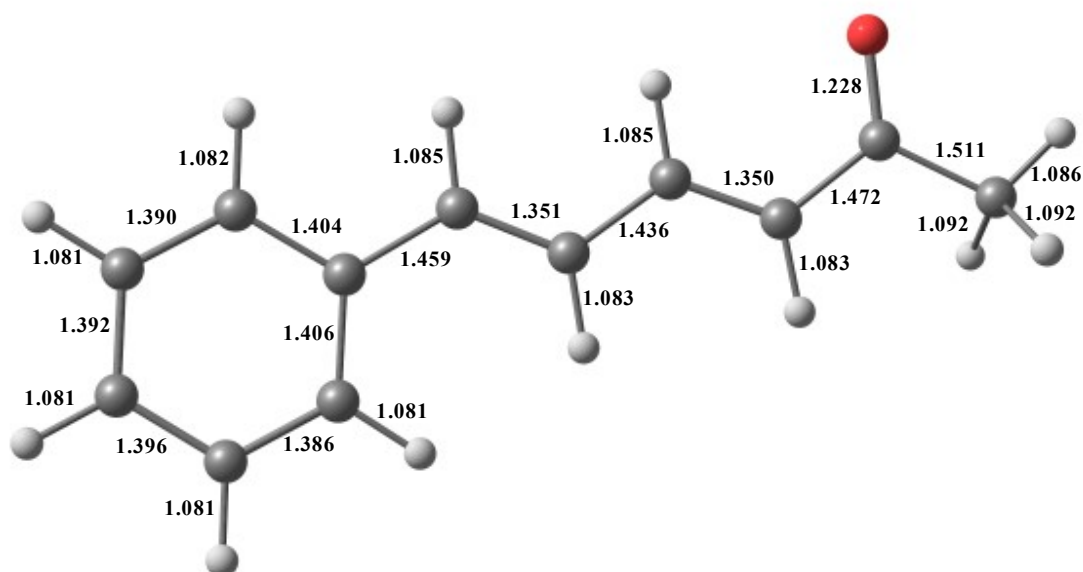

### Summary of Natural Population Analysis:

#### Natural Population

| Atom | No | Natural Charge | Core    | Valence | Rydberg | Total   |
|------|----|----------------|---------|---------|---------|---------|
| C    | 1  | -0.10234       | 1.99901 | 4.08414 | 0.01920 | 6.10234 |
| C    | 2  | -0.18029       | 1.99908 | 4.16227 | 0.01893 | 6.18029 |
| C    | 3  | -0.18361       | 1.99907 | 4.16653 | 0.01800 | 6.18361 |
| C    | 4  | -0.21356       | 1.99915 | 4.19408 | 0.02033 | 6.21356 |
| C    | 5  | -0.20944       | 1.99916 | 4.19002 | 0.02026 | 6.20944 |
| C    | 6  | -0.19885       | 1.99916 | 4.17908 | 0.02062 | 6.19885 |
| H    | 7  | 0.22229        | 0.00000 | 0.77598 | 0.00173 | 0.77771 |
| H    | 8  | 0.22089        | 0.00000 | 0.77734 | 0.00177 | 0.77911 |
| H    | 9  | 0.22341        | 0.00000 | 0.77491 | 0.00168 | 0.77659 |
| H    | 10 | 0.22274        | 0.00000 | 0.77559 | 0.00167 | 0.77726 |
| H    | 11 | 0.22213        | 0.00000 | 0.77632 | 0.00155 | 0.77787 |
| C    | 12 | -0.12982       | 1.99906 | 4.11176 | 0.01901 | 6.12982 |
| H    | 13 | 0.21450        | 0.00000 | 0.78280 | 0.00270 | 0.78550 |
| C    | 14 | -0.22889       | 1.99905 | 4.21203 | 0.01781 | 6.22889 |
| H    | 15 | 0.21393        | 0.00000 | 0.78271 | 0.00335 | 0.78607 |
| C    | 16 | -0.11358       | 1.99908 | 4.09430 | 0.02020 | 6.11358 |
| H    | 17 | 0.21877        | 0.00000 | 0.77733 | 0.00390 | 0.78123 |
| C    | 18 | -0.31896       | 1.99899 | 4.30093 | 0.01904 | 6.31896 |
| H    | 19 | 0.21719        | 0.00000 | 0.78094 | 0.00187 | 0.78281 |
| C    | 20 | 0.54420        | 1.99932 | 3.42277 | 0.03371 | 5.45580 |
| O    | 21 | -0.65604       | 1.99976 | 6.63086 | 0.02542 | 8.65604 |

|   |    |          |         |         |         |         |
|---|----|----------|---------|---------|---------|---------|
| C | 22 | -0.66359 | 1.99926 | 4.65318 | 0.01114 | 6.66359 |
| H | 23 | 0.22978  | 0.00000 | 0.76871 | 0.00151 | 0.77022 |
| H | 24 | 0.21936  | 0.00000 | 0.77852 | 0.00212 | 0.78064 |
| H | 25 | 0.22976  | 0.00000 | 0.76873 | 0.00151 | 0.77024 |

---

\* Total \*    0.00000    25.98914    65.72183    0.28903    92.00000

**A4**

**Energy E(B3LYP) = -540.310370329 h,  $G^{298} = -540.132223$  h,  $\mu = 9.41$  D**

**Cartesian coordinates, Å**

| N  | atom | x         | y         | z         |
|----|------|-----------|-----------|-----------|
| 1  | C    | 2.066365  | -0.227002 | -0.000017 |
| 2  | C    | 3.017515  | -1.267179 | -0.000015 |
| 3  | C    | 2.523607  | 1.107564  | -0.000016 |
| 4  | C    | 4.374348  | -0.986772 | -0.000007 |
| 5  | C    | 3.878653  | 1.381676  | -0.000009 |
| 6  | C    | 4.806889  | 0.337417  | -0.000003 |
| 7  | H    | 2.675946  | -2.293336 | -0.000020 |
| 8  | H    | 1.818783  | 1.925612  | -0.000024 |
| 9  | H    | 5.093558  | -1.793113 | -0.000004 |
| 10 | H    | 4.220295  | 2.406826  | -0.000010 |
| 11 | H    | 5.864929  | 0.559202  | 0.000003  |
| 12 | C    | 0.671931  | -0.579677 | -0.000019 |
| 13 | H    | 0.460654  | -1.643383 | -0.000046 |
| 14 | C    | -0.404257 | 0.267772  | 0.000013  |
| 15 | H    | -0.269684 | 1.340804  | 0.000045  |
| 16 | C    | -1.713310 | -0.237861 | 0.000004  |
| 17 | H    | -1.836562 | -1.314206 | -0.000022 |
| 18 | C    | -2.849064 | 0.554640  | 0.000026  |
| 19 | H    | -2.755377 | 1.629944  | 0.000047  |
| 20 | C    | -4.138259 | 0.034688  | 0.000019  |
| 21 | O    | -4.290650 | -1.275155 | -0.000004 |
| 22 | H    | -5.222876 | -1.533783 | -0.000013 |
| 23 | C    | -5.352504 | 0.888341  | 0.000025  |
| 24 | H    | -5.959847 | 0.666445  | -0.880462 |
| 25 | H    | -5.959870 | 0.666403  | 0.880485  |
| 26 | H    | -5.096238 | 1.942185  | 0.000052  |

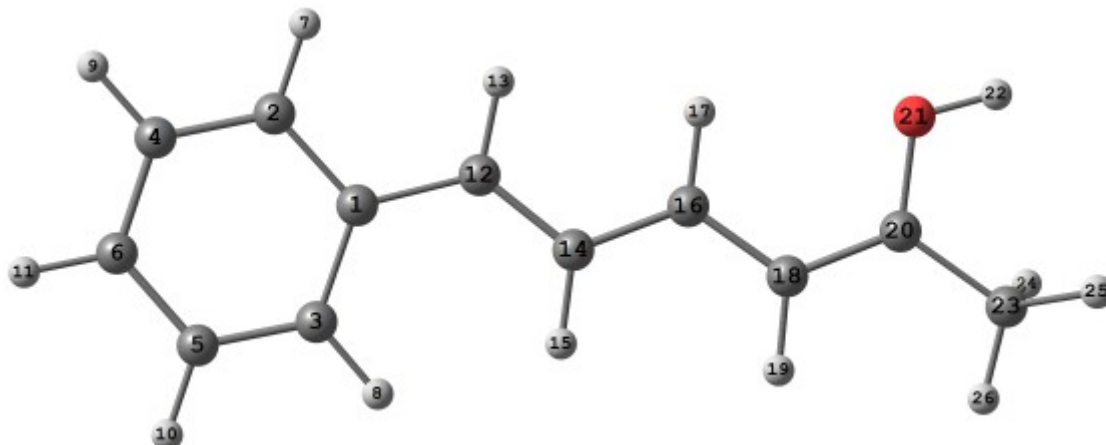

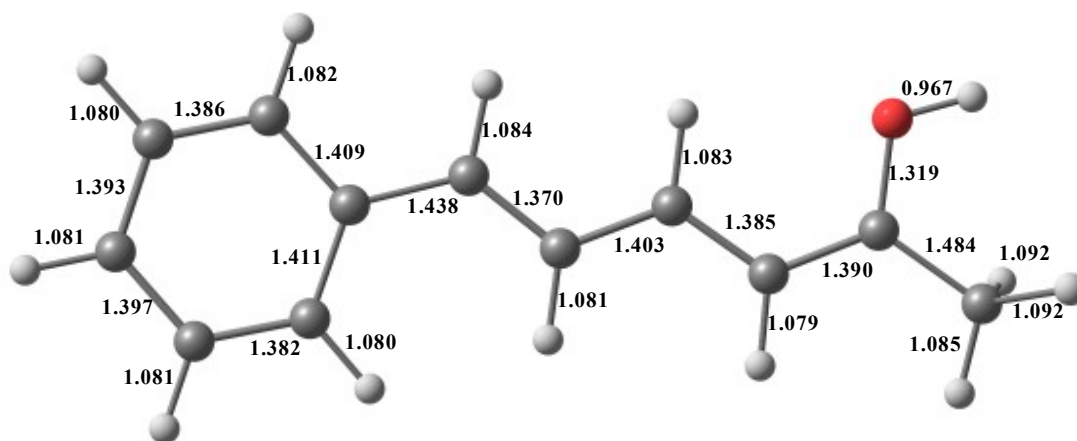

**Summary of Natural Population Analysis:**

Natural Population

| Atom No | Charge   | Core    | Valence | Rydberg | Total   |
|---------|----------|---------|---------|---------|---------|
| C 1     | -0.13452 | 1.99902 | 4.11547 | 0.02003 | 6.13452 |
| C 2     | -0.12779 | 1.99892 | 4.10880 | 0.02008 | 6.12779 |
| C 3     | -0.14832 | 1.99908 | 4.13189 | 0.01735 | 6.14832 |
| C 4     | -0.21983 | 1.99917 | 4.19954 | 0.02112 | 6.21983 |
| C 5     | -0.20776 | 1.99916 | 4.18840 | 0.02020 | 6.20776 |
| C 6     | -0.14406 | 1.99917 | 4.12556 | 0.01933 | 6.14406 |
| H 7     | 0.22911  | 0.00000 | 0.76924 | 0.00165 | 0.77089 |
| H 8     | 0.22801  | 0.00000 | 0.77027 | 0.00172 | 0.77199 |
| H 9     | 0.23035  | 0.00000 | 0.76804 | 0.00161 | 0.76965 |
| H 10    | 0.22971  | 0.00000 | 0.76862 | 0.00167 | 0.77029 |
| H 11    | 0.22709  | 0.00000 | 0.77145 | 0.00147 | 0.77291 |
| C 12    | -0.02798 | 1.99910 | 4.01042 | 0.01846 | 6.02798 |
| H 13    | 0.23140  | 0.00000 | 0.76667 | 0.00193 | 0.76860 |
| C 14    | -0.25623 | 1.99907 | 4.23814 | 0.01902 | 6.25623 |
| H 15    | 0.23204  | 0.00000 | 0.76459 | 0.00337 | 0.76796 |
| C 16    | -0.01488 | 1.99912 | 3.99586 | 0.01990 | 6.01488 |
| H 17    | 0.23507  | 0.00000 | 0.76249 | 0.00244 | 0.76493 |
| C 18    | -0.33718 | 1.99898 | 4.31826 | 0.01993 | 6.33718 |
| H 19    | 0.24619  | 0.00000 | 0.75207 | 0.00174 | 0.75381 |



|   |    |          |         |         |         |         |
|---|----|----------|---------|---------|---------|---------|
| C | 20 | 0.54138  | 1.99907 | 3.43720 | 0.02235 | 5.45862 |
| O | 21 | -0.63184 | 1.99970 | 6.60704 | 0.02510 | 8.63184 |
| H | 22 | 0.54048  | 0.00000 | 0.45689 | 0.00263 | 0.45952 |
| C | 23 | -0.66479 | 1.99923 | 4.65314 | 0.01242 | 6.66479 |
| H | 24 | 0.25123  | 0.00000 | 0.74700 | 0.00178 | 0.74877 |
| H | 25 | 0.25126  | 0.00000 | 0.74696 | 0.00178 | 0.74874 |
| H | 26 | 0.24186  | 0.00000 | 0.75681 | 0.00134 | 0.75814 |

---

\* Total \*    1.00000    25.98878    65.73080    0.28042    92.00000

**C4**

**Energy E(B3LYP) = -540.688305763 h, G<sup>298</sup> = -540.499146 h,  $\mu$ =14.9 D**

**Cartesian coordinates, Å**

| N  | atom | x         | y         | z         |
|----|------|-----------|-----------|-----------|
| 1  | C    | 2.065278  | -0.233132 | 0.066303  |
| 2  | C    | 3.043000  | -1.267762 | 0.074411  |
| 3  | C    | 2.487530  | 1.117161  | -0.093679 |
| 4  | C    | 4.378677  | -0.964988 | -0.067550 |
| 5  | C    | 3.824276  | 1.405204  | -0.235541 |
| 6  | C    | 4.767536  | 0.368574  | -0.221650 |
| 7  | H    | 2.721381  | -2.292395 | 0.195074  |
| 8  | H    | 1.763978  | 1.917398  | -0.104906 |
| 9  | H    | 5.121257  | -1.748473 | -0.060089 |
| 10 | H    | 4.150400  | 2.427141  | -0.357239 |
| 11 | H    | 5.816241  | 0.606471  | -0.332558 |
| 12 | C    | 0.722155  | -0.601028 | 0.221802  |
| 13 | H    | 0.522401  | -1.660543 | 0.333242  |
| 14 | C    | -0.403690 | 0.252892  | 0.251738  |
| 15 | H    | -0.285624 | 1.321320  | 0.145537  |
| 16 | C    | -1.635356 | -0.281985 | 0.420406  |
| 17 | H    | -1.739268 | -1.354080 | 0.526321  |
| 18 | C    | -2.871540 | 0.542741  | 0.520489  |
| 19 | H    | -2.736698 | 1.565290  | 0.163714  |
| 20 | C    | -4.101185 | -0.013320 | -0.092252 |
| 21 | O    | -4.042917 | -1.218017 | -0.491324 |
| 22 | H    | -4.878160 | -1.554399 | -0.867465 |
| 23 | H    | -3.128006 | 0.661696  | 1.587657  |
| 24 | C    | -5.309994 | 0.801485  | -0.240841 |
| 25 | H    | -5.164285 | 1.411337  | -1.141933 |
| 26 | H    | -6.203119 | 0.195683  | -0.370769 |
| 27 | H    | -5.417274 | 1.492631  | 0.592193  |

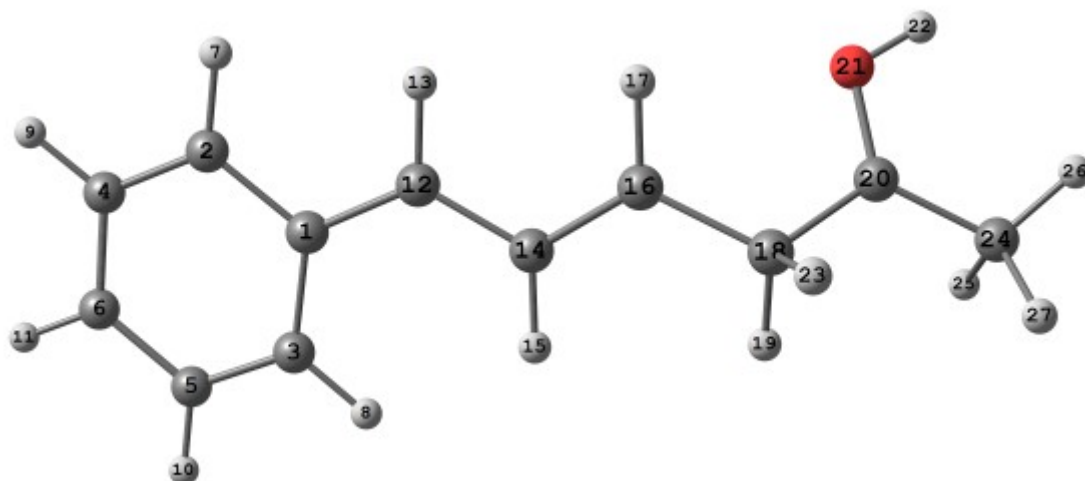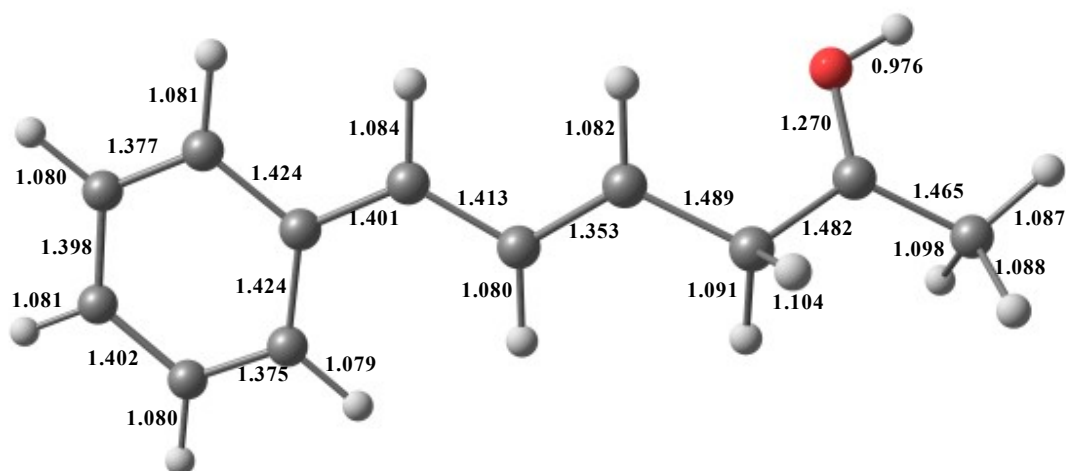

### Summary of Natural Population Analysis:

#### Natural Population

| Atom No | Natural Charge | Core    | Valence | Rydberg | Total   |
|---------|----------------|---------|---------|---------|---------|
| C 1     | -0.13934       | 1.99901 | 4.12070 | 0.01963 | 6.13934 |
| C 2     | -0.07401       | 1.99910 | 4.05661 | 0.01830 | 6.07401 |
| C 3     | -0.08788       | 1.99908 | 4.07153 | 0.01726 | 6.08788 |
| C 4     | -0.21886       | 1.99915 | 4.19972 | 0.02000 | 6.21886 |
| C 5     | -0.21247       | 1.99916 | 4.19341 | 0.01990 | 6.21247 |
| C 6     | -0.06899       | 1.99918 | 4.05079 | 0.01901 | 6.06899 |
| H 7     | 0.24292        | 0.00000 | 0.75542 | 0.00165 | 0.75708 |

|   |    |          |         |         |         |         |
|---|----|----------|---------|---------|---------|---------|
| H | 8  | 0.23922  | 0.00000 | 0.75910 | 0.00168 | 0.76078 |
| H | 9  | 0.24453  | 0.00000 | 0.75386 | 0.00160 | 0.75547 |
| H | 10 | 0.24387  | 0.00000 | 0.75454 | 0.00159 | 0.75613 |
| H | 11 | 0.24014  | 0.00000 | 0.75852 | 0.00134 | 0.75986 |
| C | 12 | 0.09313  | 1.99910 | 3.88922 | 0.01855 | 5.90687 |
| H | 13 | 0.24557  | 0.00000 | 0.75254 | 0.00189 | 0.75443 |
| C | 14 | -0.25619 | 1.99902 | 4.23802 | 0.01915 | 6.25619 |
| H | 15 | 0.24849  | 0.00000 | 0.74841 | 0.00311 | 0.75151 |
| C | 16 | 0.03007  | 1.99912 | 3.95167 | 0.01914 | 5.96993 |
| H | 17 | 0.24766  | 0.00000 | 0.75006 | 0.00228 | 0.75234 |
| C | 18 | -0.55666 | 1.99906 | 4.53802 | 0.01957 | 6.55666 |
| H | 19 | 0.29522  | 0.00000 | 0.70328 | 0.00150 | 0.70478 |
| C | 20 | 0.74274  | 1.99926 | 3.23454 | 0.02346 | 5.25726 |
| O | 21 | -0.54617 | 1.99965 | 6.51930 | 0.02721 | 8.54617 |
| H | 22 | 0.57625  | 0.00000 | 0.42128 | 0.00247 | 0.42375 |
| H | 23 | 0.33221  | 0.00000 | 0.66630 | 0.00149 | 0.66779 |
| C | 24 | -0.69391 | 1.99918 | 4.67928 | 0.01545 | 6.69391 |
| H | 25 | 0.29862  | 0.00000 | 0.70005 | 0.00132 | 0.70138 |
| H | 26 | 0.25966  | 0.00000 | 0.73822 | 0.00213 | 0.74034 |
| H | 27 | 0.27415  | 0.00000 | 0.72451 | 0.00134 | 0.72585 |

---

\* Total \*    2.00000    25.98908    65.72890    0.28202    92.00000

#### B4

Energy E(B3LYP) = -540.680429986 h,  $G^{298}$  = -540.491958 h,  $\mu=7.79$  D

#### Cartesian coordinates, Å

| N  | atom | x         | y         | z         |
|----|------|-----------|-----------|-----------|
| 1  | C    | -2.000317 | -0.274486 | 0.170765  |
| 2  | C    | -2.936136 | -1.276619 | -0.244838 |
| 3  | C    | -2.425671 | 1.090314  | 0.238659  |
| 4  | C    | -4.224109 | -0.928701 | -0.569928 |
| 5  | C    | -3.716971 | 1.418031  | -0.084141 |
| 6  | C    | -4.611256 | 0.413606  | -0.488264 |
| 7  | H    | -2.612021 | -2.306118 | -0.295441 |
| 8  | H    | -1.734947 | 1.861315  | 0.541521  |
| 9  | H    | -4.933561 | -1.678505 | -0.884658 |
| 10 | H    | -4.049041 | 2.443738  | -0.035175 |
| 11 | H    | -5.625414 | 0.686512  | -0.745353 |
| 12 | C    | -0.723680 | -0.686722 | 0.493573  |
| 13 | H    | -0.517835 | -1.747918 | 0.402979  |
| 14 | C    | 0.390895  | 0.145325  | 0.996296  |
| 15 | H    | 0.251237  | 1.209419  | 0.836894  |
| 16 | C    | 1.737877  | -0.322211 | 0.552271  |
| 17 | H    | 1.925152  | -1.388675 | 0.580777  |
| 18 | C    | 2.711853  | 0.515875  | 0.153727  |
| 19 | H    | 2.553011  | 1.582694  | 0.102654  |
| 20 | C    | 4.006847  | 0.049131  | -0.236089 |
| 21 | O    | 4.239134  | -1.215706 | -0.159739 |
| 22 | H    | 5.136218  | -1.455772 | -0.444627 |
| 23 | H    | 0.365520  | -0.010336 | 2.092688  |
| 24 | C    | 5.039150  | 0.985957  | -0.712755 |

|    |   |          |          |           |
|----|---|----------|----------|-----------|
| 25 | H | 5.217050 | 1.737459 | 0.060197  |
| 26 | H | 5.970182 | 0.489941 | -0.970114 |
| 27 | H | 4.650480 | 1.524889 | -1.580092 |

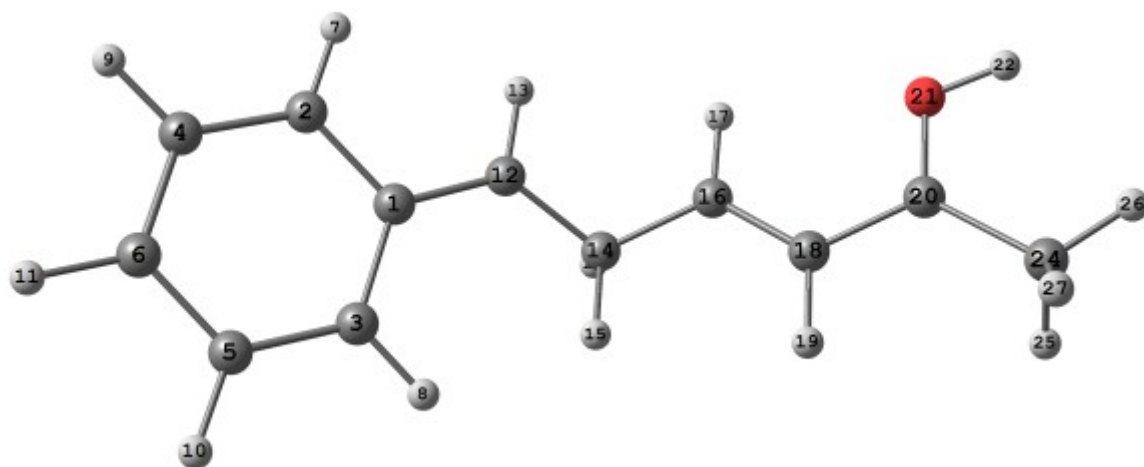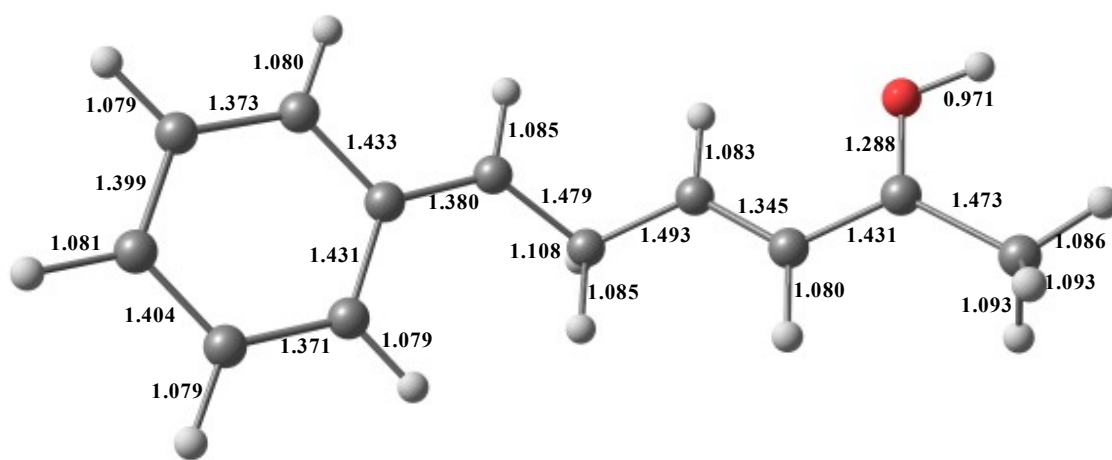

**Summary of Natural Population Analysis:**

## Natural Population

| Natural   |         | -----    |          |         |          |         |
|-----------|---------|----------|----------|---------|----------|---------|
| Atom No   | Charge  | Core     | Valence  | Rydberg | Total    |         |
| C         | 1       | -0.16763 | 1.99898  | 4.14902 | 0.01964  | 6.16763 |
| C         | 2       | -0.03830 | 1.99910  | 4.02082 | 0.01838  | 6.03830 |
| C         | 3       | -0.05726 | 1.99908  | 4.04100 | 0.01718  | 6.05726 |
| C         | 4       | -0.22713 | 1.99914  | 4.20791 | 0.02007  | 6.22713 |
| C         | 5       | -0.21749 | 1.99915  | 4.19836 | 0.01998  | 6.21749 |
| C         | 6       | -0.03514 | 1.99919  | 4.01717 | 0.01878  | 6.03514 |
| H         | 7       | 0.24873  | 0.00000  | 0.74960 | 0.00167  | 0.75127 |
| H         | 8       | 0.24210  | 0.00000  | 0.75618 | 0.00172  | 0.75790 |
| H         | 9       | 0.25167  | 0.00000  | 0.74674 | 0.00159  | 0.74833 |
| H         | 10      | 0.25086  | 0.00000  | 0.74755 | 0.00158  | 0.74914 |
| H         | 11      | 0.24641  | 0.00000  | 0.75230 | 0.00129  | 0.75359 |
| C         | 12      | 0.20452  | 1.99909  | 3.78021 | 0.01618  | 5.79548 |
| H         | 13      | 0.24717  | 0.00000  | 0.75092 | 0.00191  | 0.75283 |
| C         | 14      | -0.53017 | 1.99915  | 4.51188 | 0.01914  | 6.53017 |
| H         | 15      | 0.25784  | 0.00000  | 0.73941 | 0.00275  | 0.74216 |
| C         | 16      | 0.07481  | 1.99909  | 3.90808 | 0.01802  | 5.92519 |
| H         | 17      | 0.24517  | 0.00000  | 0.75243 | 0.00240  | 0.75483 |
| C         | 18      | -0.33506 | 1.99893  | 4.31647 | 0.01966  | 6.33506 |
| H         | 19      | 0.26222  | 0.00000  | 0.73616 | 0.00162  | 0.73778 |
| C         | 20      | 0.63558  | 1.99917  | 3.34220 | 0.02305  | 5.36442 |
| O         | 21      | -0.57115 | 1.99968  | 6.54540 | 0.02608  | 8.57115 |
| H         | 22      | 0.56189  | 0.00000  | 0.43561 | 0.00250  | 0.43811 |
| H         | 23      | 0.32742  | 0.00000  | 0.67088 | 0.00170  | 0.67258 |
| C         | 24      | -0.67850 | 1.99921  | 4.66564 | 0.01365  | 6.67850 |
| H         | 25      | 0.27823  | 0.00000  | 0.72047 | 0.00130  | 0.72177 |
| H         | 26      | 0.24484  | 0.00000  | 0.75311 | 0.00205  | 0.75516 |
| H         | 27      | 0.27836  | 0.00000  | 0.72034 | 0.00130  | 0.72164 |
| =====     |         |          |          |         |          |         |
| * Total * | 2.00000 | 25.98898 | 65.73583 | 0.27519 | 92.00000 |         |

**D4**

Energy E(B3LYP) = -541.004727105 h, G<sup>298</sup> = -540.806397 h,  $\mu$ =16.6 D

**Cartesian coordinates, Å**

| N  | atom | x         | y         | z         |
|----|------|-----------|-----------|-----------|
| 1  | C    | -2.094145 | -0.262987 | 0.141831  |
| 2  | C    | -3.088173 | -1.294211 | -0.018203 |
| 3  | C    | -2.498902 | 1.116064  | 0.077168  |
| 4  | C    | -4.399272 | -0.959547 | -0.225144 |
| 5  | C    | -3.814989 | 1.425862  | -0.122388 |
| 6  | C    | -4.760415 | 0.394548  | -0.274301 |
| 7  | H    | -2.778846 | -2.328137 | 0.028153  |
| 8  | H    | -1.773653 | 1.906743  | 0.185518  |
| 9  | H    | -5.150496 | -1.724162 | -0.348036 |
| 10 | H    | -4.134103 | 2.455524  | -0.168436 |
| 11 | H    | -5.797024 | 0.656316  | -0.435731 |
| 12 | C    | -0.804773 | -0.669589 | 0.349264  |

|    |   |           |           |           |
|----|---|-----------|-----------|-----------|
| 13 | H | -0.610466 | -1.734457 | 0.395923  |
| 14 | C | 0.373585  | 0.218887  | 0.543008  |
| 15 | H | 0.230305  | 1.282263  | 0.374013  |
| 16 | C | 1.649528  | -0.280033 | 0.118288  |
| 17 | H | 1.789079  | -1.354814 | 0.025706  |
| 18 | C | 2.772757  | 0.594885  | -0.163817 |
| 19 | H | 2.735768  | 1.546229  | 0.371289  |
| 20 | C | 4.148260  | -0.005250 | -0.156957 |
| 21 | O | 4.189235  | -1.266495 | -0.202138 |
| 22 | H | 5.089294  | -1.648259 | -0.215906 |
| 23 | H | 0.620075  | 0.160417  | 1.651430  |
| 24 | H | 2.574163  | 0.908381  | -1.217085 |
| 25 | C | 5.327463  | 0.846724  | -0.090276 |
| 26 | H | 5.396288  | 1.199585  | 0.949376  |
| 27 | H | 6.238550  | 0.315069  | -0.348372 |
| 28 | H | 5.191646  | 1.739129  | -0.701573 |

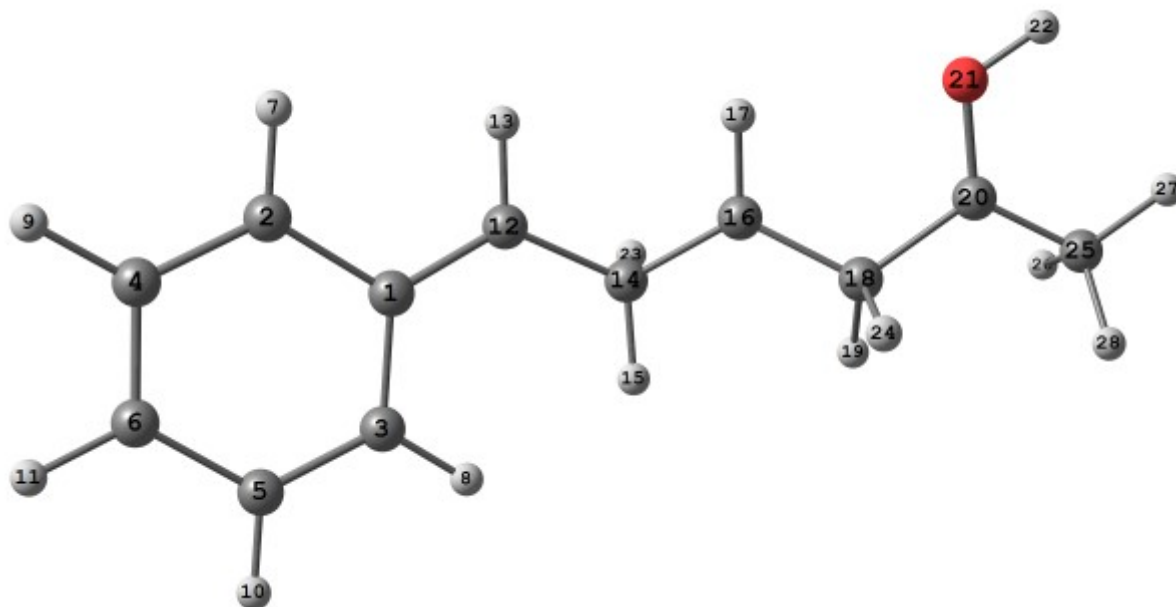

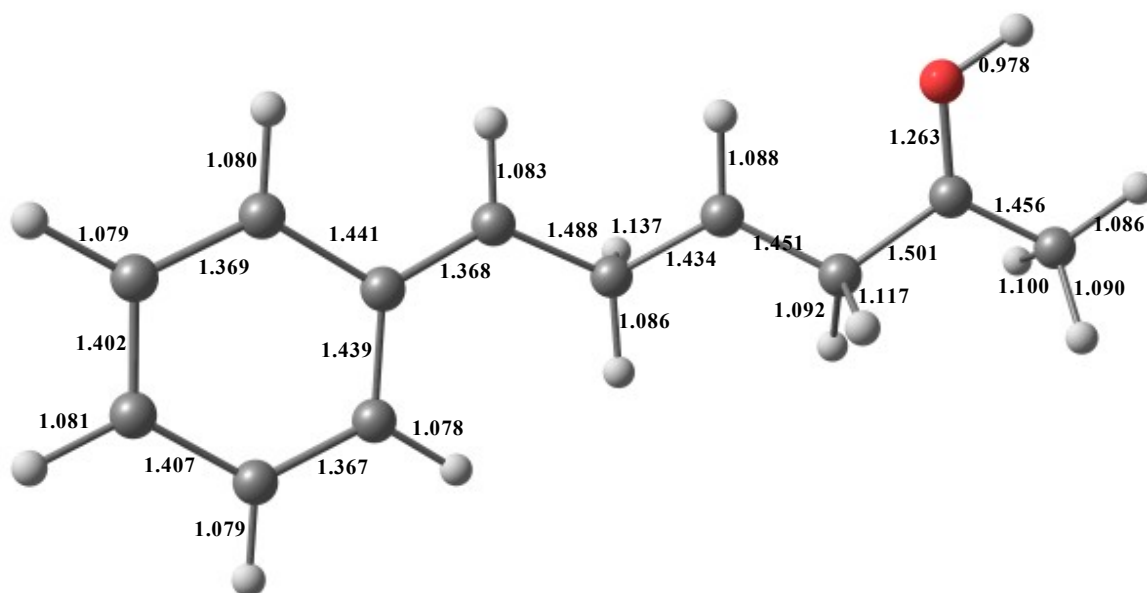

**Summary of Natural Population Analysis:**

Natural Population

| Atom | No | Charge   | Core    | Valence | Rydberg | Total   |
|------|----|----------|---------|---------|---------|---------|
| C    | 1  | -0.13305 | 1.99898 | 4.11459 | 0.01948 | 6.13305 |
| C    | 2  | -0.01797 | 1.99910 | 4.00065 | 0.01822 | 6.01797 |
| C    | 3  | -0.04694 | 1.99908 | 4.03088 | 0.01698 | 6.04694 |
| C    | 4  | -0.22476 | 1.99914 | 4.20557 | 0.02005 | 6.22476 |
| C    | 5  | -0.21438 | 1.99915 | 4.19512 | 0.02011 | 6.21438 |
| C    | 6  | 0.00710  | 1.99920 | 3.97514 | 0.01857 | 5.99290 |
| H    | 7  | 0.25317  | 0.00000 | 0.74518 | 0.00165 | 0.74683 |
| H    | 8  | 0.24458  | 0.00000 | 0.75359 | 0.00183 | 0.75542 |
| H    | 9  | 0.25721  | 0.00000 | 0.74123 | 0.00156 | 0.74279 |
| H    | 10 | 0.25665  | 0.00000 | 0.74180 | 0.00155 | 0.74335 |
| H    | 11 | 0.25023  | 0.00000 | 0.74851 | 0.00126 | 0.74977 |
| C    | 12 | 0.14470  | 1.99904 | 3.83854 | 0.01772 | 5.85530 |
| H    | 13 | 0.26687  | 0.00000 | 0.73125 | 0.00188 | 0.73313 |
| C    | 14 | -0.58342 | 1.99908 | 4.56205 | 0.02230 | 6.58342 |
| H    | 15 | 0.30891  | 0.00000 | 0.68938 | 0.00171 | 0.69109 |
| C    | 16 | 0.41590  | 1.99922 | 3.56869 | 0.01620 | 5.58410 |
| H    | 17 | 0.28825  | 0.00000 | 0.70890 | 0.00285 | 0.71175 |
| C    | 18 | -0.62546 | 1.99901 | 4.60520 | 0.02125 | 6.62546 |
| H    | 19 | 0.33694  | 0.00000 | 0.66161 | 0.00145 | 0.66306 |

|   |    |          |         |         |         |         |
|---|----|----------|---------|---------|---------|---------|
| C | 20 | 0.74807  | 1.99928 | 3.22842 | 0.02424 | 5.25193 |
| O | 21 | -0.52718 | 1.99964 | 6.50051 | 0.02702 | 8.52718 |
| H | 22 | 0.59105  | 0.00000 | 0.40658 | 0.00237 | 0.40895 |
| H | 23 | 0.42692  | 0.00000 | 0.57116 | 0.00191 | 0.57308 |
| H | 24 | 0.40514  | 0.00000 | 0.59330 | 0.00156 | 0.59486 |
| C | 25 | -0.69805 | 1.99918 | 4.68328 | 0.01560 | 6.69805 |
| H | 26 | 0.31179  | 0.00000 | 0.68692 | 0.00128 | 0.68821 |
| H | 27 | 0.26973  | 0.00000 | 0.72828 | 0.00199 | 0.73027 |
| H | 28 | 0.28801  | 0.00000 | 0.71072 | 0.00127 | 0.71199 |

---

---

\* Total \*    3.00000    25.98910    65.72704    0.28387    92.00000



1j

Energy E(B3LYP) = -837.701349355 h,  $G^{298}$  = -837.565013 h,  $\mu$  = 8.90 D

Cartesian coordinates, Å

| N  | atom | x         | y         | z         |
|----|------|-----------|-----------|-----------|
| 1  | C    | -3.252952 | 0.245603  | -0.000156 |
| 2  | C    | -4.289092 | 1.194814  | 0.000193  |
| 3  | C    | -3.597895 | -1.118339 | -0.000495 |
| 4  | C    | -5.620494 | 0.800739  | 0.000223  |
| 5  | C    | -4.927114 | -1.509423 | -0.000486 |
| 6  | C    | -5.943842 | -0.553006 | -0.000121 |
| 7  | H    | -4.039544 | 2.247576  | 0.000457  |
| 8  | H    | -2.826154 | -1.874425 | -0.000795 |
| 9  | H    | -6.403094 | 1.546487  | 0.000509  |
| 10 | H    | -5.176094 | -2.561507 | -0.000773 |
| 11 | H    | -6.979230 | -0.864204 | -0.000116 |
| 12 | C    | -1.878788 | 0.720484  | -0.000180 |
| 13 | H    | -1.765081 | 1.799416  | -0.000135 |
| 14 | C    | -0.746409 | -0.023057 | -0.000234 |
| 15 | H    | -0.791067 | -1.104792 | -0.000205 |
| 16 | C    | 0.545501  | 0.583720  | -0.000337 |
| 17 | H    | 0.586601  | 1.667412  | -0.000508 |
| 18 | C    | 1.719675  | -0.097212 | -0.000240 |
| 19 | H    | 1.729635  | -1.178453 | 0.000003  |
| 20 | C    | 2.989329  | 0.595894  | -0.000449 |
| 21 | O    | 3.173601  | 1.800313  | -0.001010 |
| 22 | C    | 4.239319  | -0.331657 | 0.000420  |
| 23 | F    | 4.245969  | -1.136007 | -1.085386 |
| 24 | F    | 5.379262  | 0.364503  | -0.001500 |
| 25 | F    | 4.247192  | -1.131981 | 1.089198  |

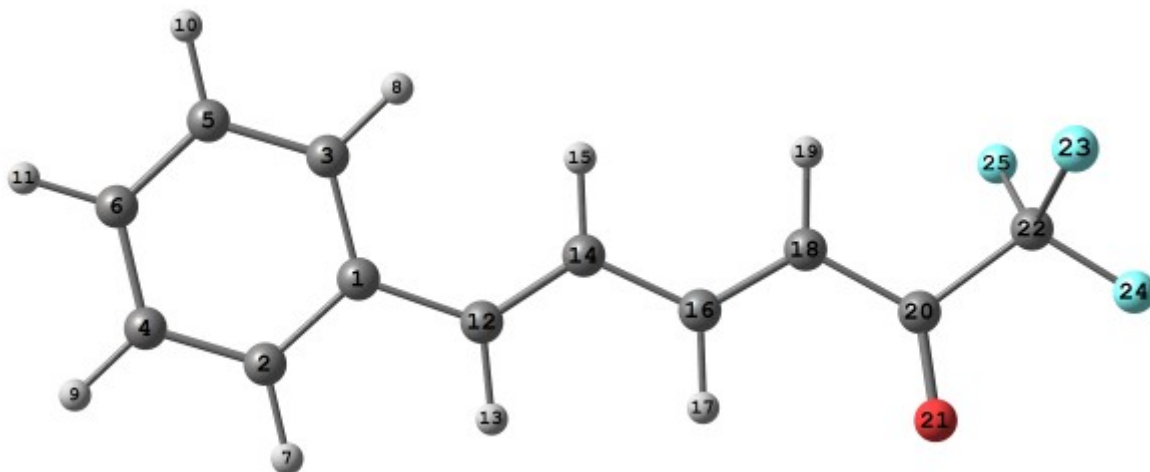

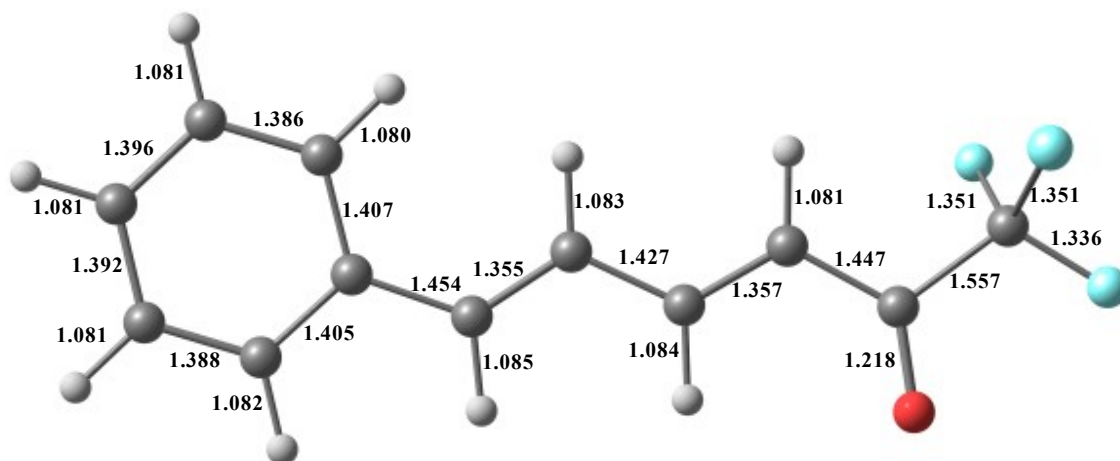

### Summary of Natural Population Analysis:

#### Natural Population

| Atom | No | Natural Charge | Core    | Valence | Rydberg | Total   |
|------|----|----------------|---------|---------|---------|---------|
| C    | 1  | -0.11480       | 1.99902 | 4.09580 | 0.01999 | 6.11480 |
| C    | 2  | -0.15777       | 1.99891 | 4.13851 | 0.02035 | 6.15777 |
| C    | 3  | -0.17331       | 1.99907 | 4.15669 | 0.01755 | 6.17331 |
| C    | 4  | -0.22077       | 1.99917 | 4.20032 | 0.02128 | 6.22077 |
| C    | 5  | -0.20987       | 1.99916 | 4.19037 | 0.02034 | 6.20987 |
| C    | 6  | -0.18671       | 1.99916 | 4.16773 | 0.01982 | 6.18671 |
| H    | 7  | 0.22329        | 0.00000 | 0.77499 | 0.00172 | 0.77671 |
| H    | 8  | 0.22265        | 0.00000 | 0.77560 | 0.00174 | 0.77735 |
| H    | 9  | 0.22541        | 0.00000 | 0.77296 | 0.00163 | 0.77459 |
| H    | 10 | 0.22474        | 0.00000 | 0.77357 | 0.00169 | 0.77526 |
| H    | 11 | 0.22381        | 0.00000 | 0.77465 | 0.00154 | 0.77619 |
| C    | 12 | -0.09226       | 1.99907 | 4.07454 | 0.01864 | 6.09226 |
| H    | 13 | 0.21925        | 0.00000 | 0.77888 | 0.00186 | 0.78075 |
| C    | 14 | -0.24132       | 1.99905 | 4.22397 | 0.01829 | 6.24132 |
| H    | 15 | 0.21997        | 0.00000 | 0.77671 | 0.00332 | 0.78003 |
| C    | 16 | -0.07512       | 1.99910 | 4.05530 | 0.02071 | 6.07512 |
| H    | 17 | 0.22277        | 0.00000 | 0.77261 | 0.00462 | 0.77723 |
| C    | 18 | -0.34933       | 1.99901 | 4.33071 | 0.01961 | 6.34933 |
| H    | 19 | 0.23466        | 0.00000 | 0.76296 | 0.00238 | 0.76534 |
| C    | 20 | 0.45353        | 1.99919 | 3.50811 | 0.03916 | 5.54647 |
| O    | 21 | -0.59714       | 1.99976 | 6.57166 | 0.02572 | 8.59714 |

|   |    |          |         |         |         |         |
|---|----|----------|---------|---------|---------|---------|
| C | 22 | 1.02239  | 1.99939 | 2.92650 | 0.05172 | 4.97761 |
| F | 23 | -0.36081 | 1.99992 | 7.35147 | 0.00942 | 9.36081 |
| F | 24 | -0.35248 | 1.99991 | 7.34101 | 0.01155 | 9.35248 |
| F | 25 | -0.36080 | 1.99992 | 7.35146 | 0.00942 | 9.36080 |

---

\* Total \* 0.00000 31.98881 83.64709 0.36409 116.00000

A5

Energy E(B3LYP) = -838.112129827 h,  $G^{298}$  = -837.961567 h,  $\mu=5.05$  D

Cartesian coordinates, Å

| N  | atom | x         | y         | z         |
|----|------|-----------|-----------|-----------|
| 1  | C    | 3.265837  | -0.237018 | -0.000848 |
| 2  | C    | 4.289516  | -1.212694 | 0.015073  |
| 3  | C    | 3.626160  | 1.131567  | -0.012620 |
| 4  | C    | 5.619698  | -0.837248 | 0.020081  |
| 5  | C    | 4.956274  | 1.497673  | -0.008664 |
| 6  | C    | 5.953584  | 0.516874  | 0.008046  |
| 7  | H    | 4.018391  | -2.259233 | 0.023835  |
| 8  | H    | 2.864271  | 1.896078  | -0.025840 |
| 9  | H    | 6.396251  | -1.587792 | 0.032907  |
| 10 | H    | 5.228970  | 2.542812  | -0.018532 |
| 11 | H    | 6.993314  | 0.812750  | 0.011349  |
| 12 | C    | 1.914229  | -0.685217 | -0.004942 |
| 13 | H    | 1.774628  | -1.760336 | -0.000967 |
| 14 | C    | 0.767544  | 0.090355  | -0.012346 |
| 15 | H    | 0.824883  | 1.169622  | -0.013524 |
| 16 | C    | -0.478021 | -0.516933 | -0.017747 |
| 17 | H    | -0.519495 | -1.599130 | -0.017556 |
| 18 | C    | -1.691811 | 0.191781  | -0.025763 |
| 19 | H    | -1.684486 | 1.270869  | -0.031949 |
| 20 | C    | -2.901577 | -0.437971 | -0.028207 |
| 21 | O    | -3.020871 | -1.750488 | -0.011857 |
| 22 | H    | -3.940016 | -2.044024 | -0.099892 |
| 23 | C    | -4.198650 | 0.367581  | 0.004246  |
| 24 | F    | -4.082025 | 1.530164  | -0.638432 |
| 25 | F    | -5.194231 | -0.337553 | -0.565759 |
| 26 | F    | -4.560014 | 0.624032  | 1.272766  |

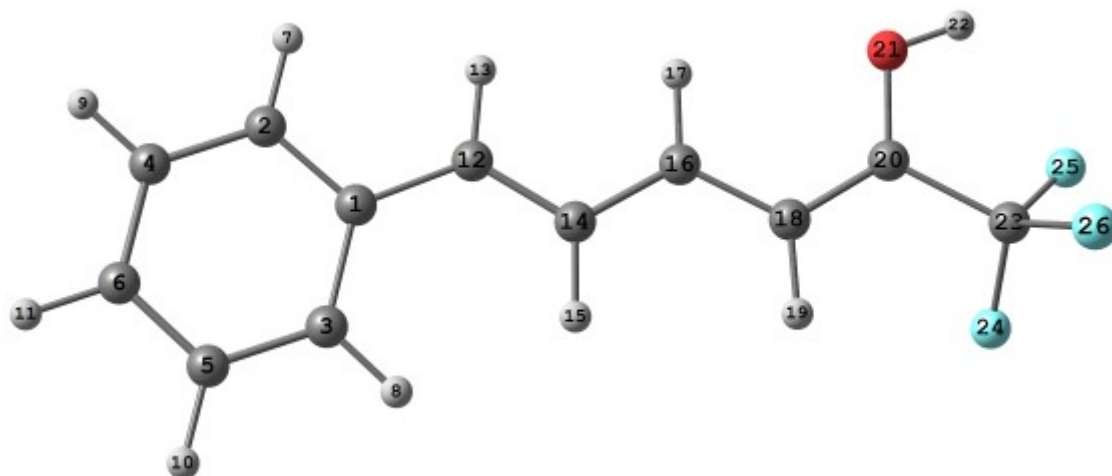

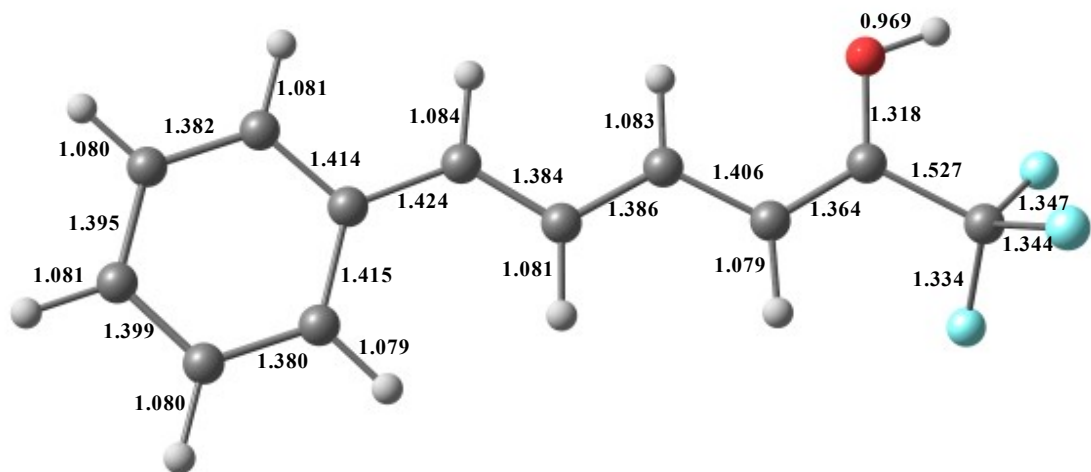

**Summary of Natural Population Analysis:**  
Natural Population

| Atom No | Natural Charge | Core    | Valence | Rydberg | Total   |
|---------|----------------|---------|---------|---------|---------|
| C 1     | -0.13982       | 1.99902 | 4.12082 | 0.01998 | 6.13982 |
| C 2     | -0.10570       | 1.99893 | 4.08691 | 0.01987 | 6.10570 |
| C 3     | -0.12942       | 1.99908 | 4.11314 | 0.01720 | 6.12942 |
| C 4     | -0.22267       | 1.99917 | 4.20247 | 0.02103 | 6.22267 |
| C 5     | -0.20985       | 1.99915 | 4.19058 | 0.02011 | 6.20985 |
| C 6     | -0.11174       | 1.99917 | 4.09355 | 0.01901 | 6.11174 |
| H 7     | 0.23424        | 0.00000 | 0.76416 | 0.00160 | 0.76576 |
| H 8     | 0.23303        | 0.00000 | 0.76529 | 0.00169 | 0.76697 |
| H 9     | 0.23567        | 0.00000 | 0.76274 | 0.00159 | 0.76433 |
| H 10    | 0.23503        | 0.00000 | 0.76332 | 0.00165 | 0.76497 |
| H 11    | 0.23100        | 0.00000 | 0.76759 | 0.00142 | 0.76900 |
| C 12    | 0.01568        | 1.99911 | 3.96682 | 0.01840 | 5.98432 |
| H 13    | 0.23748        | 0.00000 | 0.76064 | 0.00188 | 0.76252 |
| C 14    | -0.25302       | 1.99907 | 4.23494 | 0.01901 | 6.25302 |
| H 15    | 0.23951        | 0.00000 | 0.75729 | 0.00320 | 0.76049 |
| C 16    | -0.00431       | 1.99914 | 3.98499 | 0.02018 | 6.00431 |
| H 17    | 0.23950        | 0.00000 | 0.75798 | 0.00252 | 0.76050 |
| C 18    | -0.32080       | 1.99900 | 4.30151 | 0.02029 | 6.32080 |
| H 19    | 0.26240        | 0.00000 | 0.73564 | 0.00196 | 0.73760 |
| C 20    | 0.39081        | 1.99888 | 3.58051 | 0.02980 | 5.60919 |

|   |    |          |         |         |         |         |
|---|----|----------|---------|---------|---------|---------|
| O | 21 | -0.61921 | 1.99971 | 6.59321 | 0.02629 | 8.61921 |
| H | 22 | 0.54698  | 0.00000 | 0.45013 | 0.00289 | 0.45302 |
| C | 23 | 1.04243  | 1.99930 | 2.90540 | 0.05287 | 4.95757 |
| F | 24 | -0.33582 | 1.99991 | 7.32597 | 0.00994 | 9.33582 |
| F | 25 | -0.35035 | 1.99992 | 7.34000 | 0.01043 | 9.35035 |
| F | 26 | -0.34103 | 1.99991 | 7.33129 | 0.00983 | 9.34103 |

---

\* Total \* 1.00000 31.98846 83.65689 0.35465 116.00000

### C5

Energy E(B3LYP)=-838.467932455 h, G<sup>298</sup>=-838.305245 h,  $\mu$ =3.27 D

### Cartesian coordinates, Å

| N  | atom | x         | y         | z         |
|----|------|-----------|-----------|-----------|
| 1  | C    | 3.269671  | -0.237522 | 0.084354  |
| 2  | C    | 4.307436  | -1.213933 | 0.132304  |
| 3  | C    | 3.611678  | 1.128388  | -0.137589 |
| 4  | C    | 5.621268  | -0.840321 | -0.031668 |
| 5  | C    | 4.928025  | 1.486566  | -0.299117 |
| 6  | C    | 5.929843  | 0.506686  | -0.245872 |
| 7  | H    | 4.046106  | -2.248928 | 0.300155  |
| 8  | H    | 2.841855  | 1.882983  | -0.178222 |
| 9  | H    | 6.409065  | -1.577346 | 0.004689  |
| 10 | H    | 5.194933  | 2.519145  | -0.465942 |
| 11 | H    | 6.962521  | 0.800078  | -0.373262 |
| 12 | C    | 1.955265  | -0.674700 | 0.264926  |
| 13 | H    | 1.816706  | -1.737004 | 0.428011  |
| 14 | C    | 0.776697  | 0.114997  | 0.259714  |
| 15 | H    | 0.831100  | 1.181530  | 0.098721  |
| 16 | C    | -0.415276 | -0.485061 | 0.463396  |
| 17 | H    | -0.458389 | -1.554305 | 0.626580  |
| 18 | C    | -1.702579 | 0.267319  | 0.533459  |
| 19 | H    | -1.634647 | 1.290671  | 0.143473  |
| 20 | C    | -2.853488 | -0.370366 | -0.107435 |
| 21 | O    | -2.725823 | -1.453591 | -0.719557 |
| 22 | H    | -3.554526 | -1.810938 | -1.110428 |
| 23 | H    | -1.993383 | 0.418240  | 1.587919  |
| 24 | C    | -4.260349 | 0.287542  | -0.037519 |
| 25 | F    | -4.215792 | 1.463893  | -0.647969 |
| 26 | F    | -5.141565 | -0.504126 | -0.648697 |
| 27 | F    | -4.605298 | 0.445460  | 1.232337  |

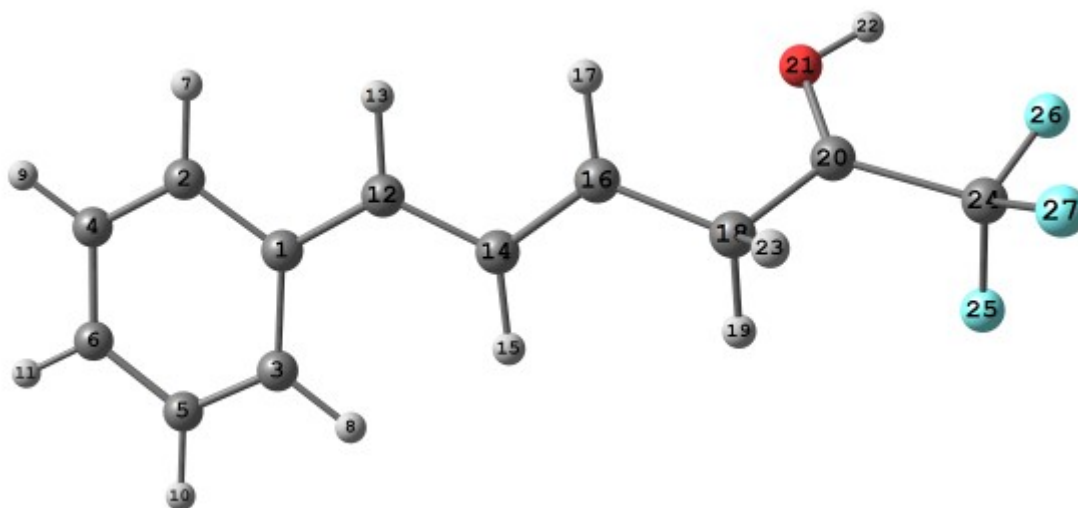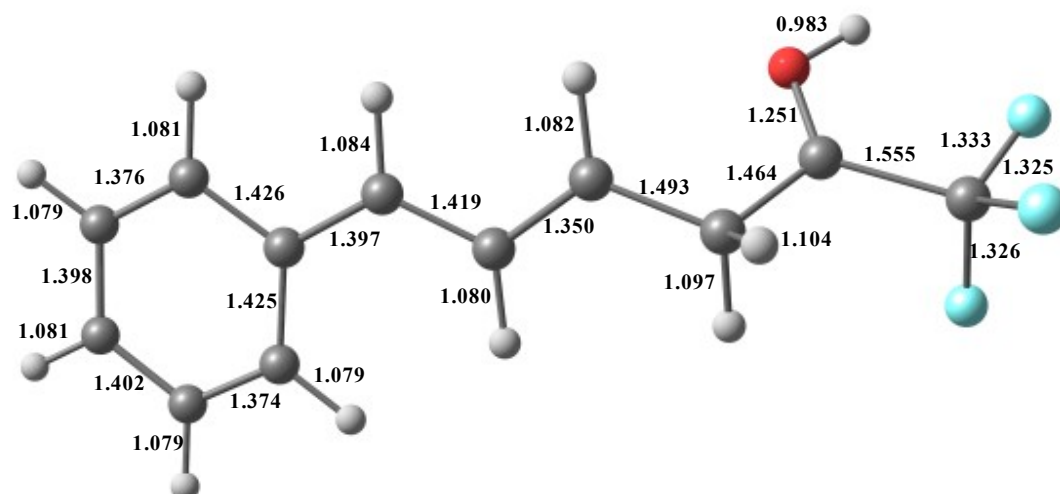

**Summary of Natural Population Analysis:**

Natural Population

| Atom No | Natural Charge | Core    | Valence | Rydberg | Total   |
|---------|----------------|---------|---------|---------|---------|
| C 1     | -0.13426       | 1.99901 | 4.11562 | 0.01963 | 6.13426 |
| C 2     | -0.06971       | 1.99910 | 4.05235 | 0.01826 | 6.06971 |
| C 3     | -0.08472       | 1.99908 | 4.06842 | 0.01722 | 6.08472 |
| C 4     | -0.22329       | 1.99914 | 4.20417 | 0.01997 | 6.22329 |
| C 5     | -0.21314       | 1.99916 | 4.19411 | 0.01987 | 6.21314 |

|   |    |          |         |         |         |         |
|---|----|----------|---------|---------|---------|---------|
| C | 6  | -0.05550 | 1.99919 | 4.03739 | 0.01893 | 6.05550 |
| H | 7  | 0.24389  | 0.00000 | 0.75447 | 0.00165 | 0.75611 |
| H | 8  | 0.23986  | 0.00000 | 0.75846 | 0.00168 | 0.76014 |
| H | 9  | 0.24604  | 0.00000 | 0.75236 | 0.00160 | 0.75396 |
| H | 10 | 0.24477  | 0.00000 | 0.75364 | 0.00159 | 0.75523 |
| H | 11 | 0.24017  | 0.00000 | 0.75850 | 0.00133 | 0.75983 |
| C | 12 | 0.10535  | 1.99910 | 3.87699 | 0.01856 | 5.89465 |
| H | 13 | 0.24416  | 0.00000 | 0.75397 | 0.00188 | 0.75584 |
| C | 14 | -0.23902 | 1.99902 | 4.22088 | 0.01912 | 6.23902 |
| H | 15 | 0.24999  | 0.00000 | 0.74706 | 0.00295 | 0.75001 |
| C | 16 | -0.00221 | 1.99911 | 3.98394 | 0.01916 | 6.00221 |
| H | 17 | 0.25324  | 0.00000 | 0.74453 | 0.00223 | 0.74676 |
| C | 18 | -0.57224 | 1.99908 | 4.55237 | 0.02079 | 6.57224 |
| H | 19 | 0.32454  | 0.00000 | 0.67359 | 0.00188 | 0.67546 |
| C | 20 | 0.66814  | 1.99923 | 3.30274 | 0.02989 | 5.33186 |
| O | 21 | -0.48343 | 1.99964 | 6.45463 | 0.02917 | 8.48343 |
| H | 22 | 0.59037  | 0.00000 | 0.40682 | 0.00281 | 0.40963 |
| H | 23 | 0.34291  | 0.00000 | 0.65525 | 0.00184 | 0.65709 |
| C | 24 | 1.03290  | 1.99940 | 2.91175 | 0.05595 | 4.96710 |
| F | 25 | -0.31115 | 1.99991 | 7.30303 | 0.00821 | 9.31115 |
| F | 26 | -0.32632 | 1.99991 | 7.31767 | 0.00874 | 9.32632 |
| F | 27 | -0.31132 | 1.99991 | 7.30318 | 0.00823 | 9.31132 |

---

\* Total \*    2.00000    31.98898    83.65790    0.35312    116.00000

## B5

Energy E(B3LYP) = -838.468821051 h, G<sup>298</sup> = -838.308007 h,  $\mu$  = 8.69 D

### Cartesian coordinates, Å

| N  | atom | x         | y         | z         |
|----|------|-----------|-----------|-----------|
| 1  | C    | 3.172576  | 0.291366  | 0.158960  |
| 2  | C    | 4.198235  | 1.185584  | -0.294758 |
| 3  | C    | 3.459030  | -1.109149 | 0.252859  |
| 4  | C    | 5.439289  | 0.703283  | -0.626300 |
| 5  | C    | 4.704667  | -1.571309 | -0.081621 |
| 6  | C    | 5.689533  | -0.669956 | -0.519258 |
| 7  | H    | 3.976511  | 2.240569  | -0.365471 |
| 8  | H    | 2.698560  | -1.800379 | 0.579758  |
| 9  | H    | 6.215976  | 1.370517  | -0.966804 |
| 10 | H    | 4.932955  | -2.624046 | -0.016718 |
| 11 | H    | 6.666704  | -1.049748 | -0.783832 |
| 12 | C    | 1.953947  | 0.840648  | 0.488204  |
| 13 | H    | 1.850280  | 1.913035  | 0.362780  |
| 14 | C    | 0.772982  | 0.140109  | 1.044967  |
| 15 | H    | 0.817657  | -0.941905 | 0.978865  |
| 16 | C    | -0.526248 | 0.682692  | 0.575560  |
| 17 | H    | -0.590376 | 1.750385  | 0.403646  |
| 18 | C    | -1.629507 | -0.087952 | 0.391489  |
| 19 | H    | -1.608329 | -1.155707 | 0.548782  |
| 20 | C    | -2.845791 | 0.479851  | -0.020948 |
| 21 | O    | -2.979578 | 1.728764  | -0.248443 |
| 22 | H    | -3.877939 | 1.981977  | -0.535744 |

|    |   |           |           |           |
|----|---|-----------|-----------|-----------|
| 23 | H | 0.799131  | 0.382130  | 2.128260  |
| 24 | C | -4.080215 | -0.428942 | -0.213414 |
| 25 | F | -4.390800 | -1.009758 | 0.942687  |
| 26 | F | -5.118222 | 0.303816  | -0.631121 |
| 27 | F | -3.812699 | -1.364535 | -1.120501 |

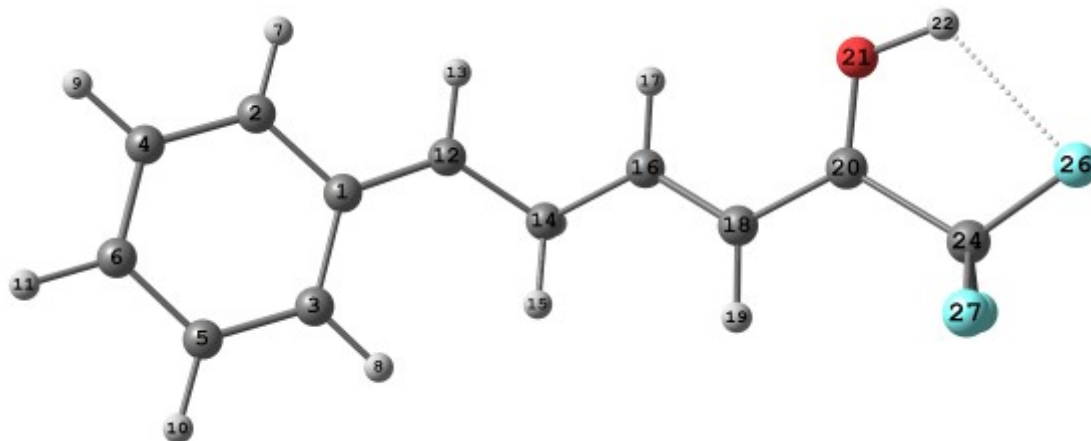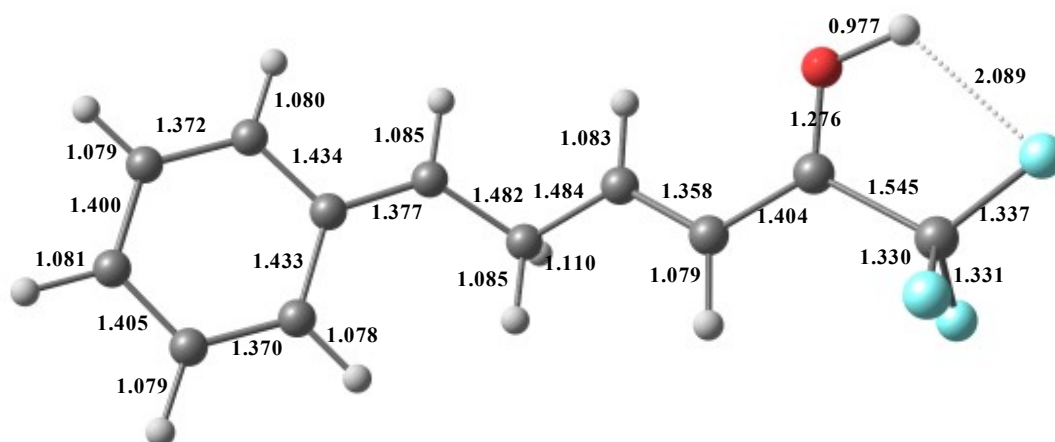



**Summary of Natural Population Analysis:**

## Natural Population

| Natural   |    | -----    |          |          |         |           |
|-----------|----|----------|----------|----------|---------|-----------|
| Atom      | No | Charge   | Core     | Valence  | Rydberg | Total     |
| -----     |    |          |          |          |         |           |
| C         | 1  | -0.16171 | 1.99898  | 4.14312  | 0.01961 | 6.16171   |
| C         | 2  | -0.03301 | 1.99910  | 4.01555  | 0.01836 | 6.03301   |
| C         | 3  | -0.05551 | 1.99908  | 4.03930  | 0.01713 | 6.05551   |
| C         | 4  | -0.22929 | 1.99914  | 4.21008  | 0.02007 | 6.22929   |
| C         | 5  | -0.21889 | 1.99915  | 4.19975  | 0.01999 | 6.21889   |
| C         | 6  | -0.02387 | 1.99919  | 4.00593  | 0.01874 | 6.02387   |
| H         | 7  | 0.24966  | 0.00000  | 0.74868  | 0.00167 | 0.75034   |
| H         | 8  | 0.24305  | 0.00000  | 0.75525  | 0.00170 | 0.75695   |
| H         | 9  | 0.25321  | 0.00000  | 0.74520  | 0.00158 | 0.74679   |
| H         | 10 | 0.25240  | 0.00000  | 0.74603  | 0.00158 | 0.74760   |
| H         | 11 | 0.24694  | 0.00000  | 0.75178  | 0.00128 | 0.75306   |
| C         | 12 | 0.19200  | 1.99908  | 3.79255  | 0.01637 | 5.80800   |
| H         | 13 | 0.25132  | 0.00000  | 0.74679  | 0.00189 | 0.74868   |
| C         | 14 | -0.54350 | 1.99915  | 4.52502  | 0.01934 | 6.54350   |
| H         | 15 | 0.26714  | 0.00000  | 0.73019  | 0.00267 | 0.73286   |
| C         | 16 | 0.12327  | 1.99913  | 3.85962  | 0.01799 | 5.87673   |
| H         | 17 | 0.25519  | 0.00000  | 0.74228  | 0.00253 | 0.74481   |
| C         | 18 | -0.33983 | 1.99898  | 4.32015  | 0.02070 | 6.33983   |
| H         | 19 | 0.28101  | 0.00000  | 0.71690  | 0.00208 | 0.71899   |
| C         | 20 | 0.54574  | 1.99907  | 3.42324  | 0.03195 | 5.45426   |
| O         | 21 | -0.53415 | 1.99967  | 6.50697  | 0.02751 | 8.53415   |
| H         | 22 | 0.57189  | 0.00000  | 0.42534  | 0.00278 | 0.42811   |
| H         | 23 | 0.34312  | 0.00000  | 0.65521  | 0.00167 | 0.65688   |
| C         | 24 | 1.03632  | 1.99938  | 2.91099  | 0.05332 | 4.96368   |
| F         | 25 | -0.31886 | 1.99991  | 7.30901  | 0.00995 | 9.31886   |
| F         | 26 | -0.33450 | 1.99991  | 7.32397  | 0.01062 | 9.33450   |
| F         | 27 | -0.31914 | 1.99991  | 7.30928  | 0.00994 | 9.31914   |
| * Total * |    | 2.00000  | 31.98884 | 83.65817 | 0.35300 | 116.00000 |

**D5**

Energy E(B3LYP) = -838.776055407 h,  $G^{298}$  = -838,605353 h,  $\mu$ =6.3 D

**Cartesian coordinates, Å**

| N  | atom | x         | y         | z         |
|----|------|-----------|-----------|-----------|
| 1  | C    | -3.309279 | 0.274145  | -0.039253 |
| 2  | C    | -4.363521 | 1.221882  | 0.226969  |
| 3  | C    | -3.639569 | -1.120520 | -0.182612 |
| 4  | C    | -5.659797 | 0.796727  | 0.329168  |
| 5  | C    | -4.941641 | -1.520434 | -0.078334 |
| 6  | C    | -5.946953 | -0.568063 | 0.176032  |
| 7  | H    | -4.111138 | 2.266401  | 0.336576  |
| 8  | H    | -2.869150 | -1.850436 | -0.373324 |
| 9  | H    | -6.456313 | 1.497891  | 0.523523  |
| 10 | H    | -5.205619 | -2.560890 | -0.187242 |
| 11 | H    | -6.972443 | -0.901109 | 0.257205  |
| 12 | C    | -2.040934 | 0.771639  | -0.152313 |

|    |   |           |           |           |
|----|---|-----------|-----------|-----------|
| 13 | H | -1.899712 | 1.839413  | -0.040320 |
| 14 | C | -0.820779 | -0.026154 | -0.451797 |
| 15 | H | -0.891514 | -1.106166 | -0.352954 |
| 16 | C | 0.448473  | 0.534820  | -0.121484 |
| 17 | H | 0.523563  | 1.611935  | 0.009980  |
| 18 | C | 1.659307  | -0.278204 | -0.002396 |
| 19 | H | 1.673878  | -1.145300 | -0.676779 |
| 20 | C | 2.960184  | 0.431555  | -0.063698 |
| 21 | O | 2.991594  | 1.655384  | -0.274246 |
| 22 | H | 3.889376  | 2.064690  | -0.295145 |
| 23 | H | -0.643064 | 0.121412  | -1.572761 |
| 24 | H | 1.583518  | -0.775386 | 0.990129  |
| 25 | C | 4.291635  | -0.354975 | 0.130392  |
| 26 | F | 4.357313  | -1.306261 | -0.786354 |
| 27 | F | 5.307332  | 0.488339  | -0.008699 |
| 28 | F | 4.293477  | -0.879859 | 1.345168  |

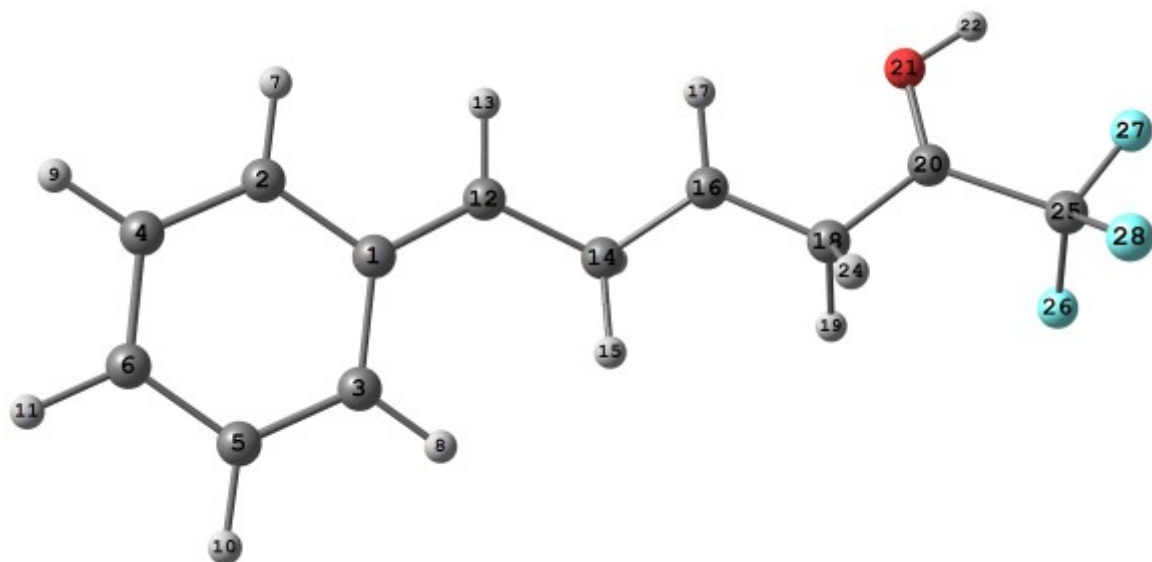

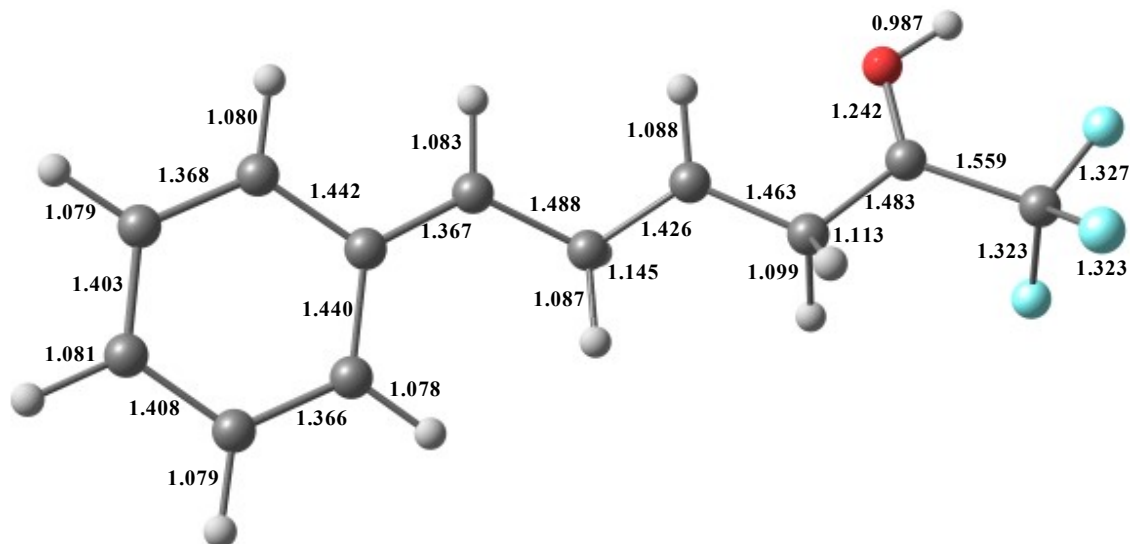

### Summary of Natural Population Analysis:

#### Natural Population

| Atom | No | Natural Charge | Core    | Valence | Rydberg | Total   |
|------|----|----------------|---------|---------|---------|---------|
| C    | 1  | -0.12587       | 1.99899 | 4.10741 | 0.01947 | 6.12587 |
| C    | 2  | -0.02386       | 1.99910 | 4.00654 | 0.01821 | 6.02386 |
| C    | 3  | -0.05725       | 1.99908 | 4.04124 | 0.01692 | 6.05725 |
| C    | 4  | -0.21910       | 1.99914 | 4.19993 | 0.02003 | 6.21910 |
| C    | 5  | -0.20546       | 1.99915 | 4.18619 | 0.02011 | 6.20546 |
| C    | 6  | 0.02813        | 1.99920 | 3.95416 | 0.01851 | 5.97187 |
| H    | 7  | 0.25474        | 0.00000 | 0.74361 | 0.00164 | 0.74526 |
| H    | 8  | 0.24603        | 0.00000 | 0.75216 | 0.00182 | 0.75397 |
| H    | 9  | 0.25677        | 0.00000 | 0.74167 | 0.00155 | 0.74323 |
| H    | 10 | 0.25596        | 0.00000 | 0.74250 | 0.00154 | 0.74404 |
| H    | 11 | 0.24787        | 0.00000 | 0.75088 | 0.00125 | 0.75213 |
| C    | 12 | 0.13079        | 1.99903 | 3.85243 | 0.01775 | 5.86921 |
| H    | 13 | 0.27038        | 0.00000 | 0.72775 | 0.00187 | 0.72962 |
| C    | 14 | -0.57951       | 1.99907 | 4.55746 | 0.02299 | 6.57951 |
| H    | 15 | 0.31639        | 0.00000 | 0.68197 | 0.00164 | 0.68361 |
| C    | 16 | 0.40239        | 1.99922 | 3.58188 | 0.01650 | 5.59761 |
| H    | 17 | 0.29382        | 0.00000 | 0.70337 | 0.00280 | 0.70618 |
| C    | 18 | -0.64559       | 1.99903 | 4.62509 | 0.02147 | 6.64559 |
| H    | 19 | 0.36932        | 0.00000 | 0.62880 | 0.00188 | 0.63068 |
| C    | 20 | 0.68101        | 1.99929 | 3.28564 | 0.03406 | 5.31899 |
| O    | 21 | -0.46631       | 1.99963 | 6.43764 | 0.02904 | 8.46631 |

|           |    |          |          |          |         |           |
|-----------|----|----------|----------|----------|---------|-----------|
| H         | 22 | 0.60701  | 0.00000  | 0.39030  | 0.00269 | 0.39299   |
| H         | 23 | 0.44151  | 0.00000  | 0.55650  | 0.00199 | 0.55849   |
| H         | 24 | 0.40419  | 0.00000  | 0.59394  | 0.00187 | 0.59581   |
| C         | 25 | 1.03398  | 1.99943  | 2.91148  | 0.05511 | 4.96602   |
| F         | 26 | -0.30167 | 1.99991  | 7.29132  | 0.01045 | 9.30167   |
| F         | 27 | -0.31461 | 1.99991  | 7.30376  | 0.01094 | 9.31461   |
| F         | 28 | -0.30108 | 1.99991  | 7.29077  | 0.01040 | 9.30108   |
| =====     |    |          |          |          |         |           |
| * Total * |    | 3.00000  | 31.98909 | 83.64640 | 0.36452 | 116.00000 |

1k

Energy E(B3LYP)=-479.457133247 h,  $G^{298} = -479.328819$  h,  $\mu=8.03$  D

Cartesian coordinates, Å

| N  | atom | x         | y         | z         |
|----|------|-----------|-----------|-----------|
| 1  | C    | -1.437623 | -0.250427 | -0.000551 |
| 2  | C    | -2.383567 | -1.288393 | 0.000065  |
| 3  | C    | -1.906682 | 1.074978  | -0.000704 |
| 4  | C    | -3.746263 | -1.017084 | 0.000720  |
| 5  | C    | -3.266610 | 1.344286  | -0.000092 |
| 6  | C    | -4.193071 | 0.300702  | 0.000665  |
| 7  | H    | -2.039879 | -2.314497 | 0.000073  |
| 8  | H    | -1.207957 | 1.899232  | -0.001454 |
| 9  | H    | -4.456966 | -1.831886 | 0.001239  |
| 10 | H    | -3.609068 | 2.369912  | -0.000268 |
| 11 | H    | -5.252551 | 0.516112  | 0.001132  |
| 12 | C    | -0.021430 | -0.598345 | -0.001033 |
| 13 | H    | 0.188886  | -1.662810 | -0.002540 |
| 14 | C    | 1.032964  | 0.245085  | 0.000350  |
| 15 | H    | 0.887454  | 1.318211  | 0.002114  |
| 16 | C    | 2.387684  | -0.229170 | -0.000338 |
| 17 | H    | 2.537059  | -1.302598 | -0.001993 |
| 18 | C    | 3.469455  | 0.581427  | 0.000947  |
| 19 | H    | 3.366420  | 1.658691  | 0.002579  |
| 20 | C    | 4.794998  | 0.080567  | 0.000218  |
| 21 | N    | 5.886783  | -0.301732 | -0.000338 |

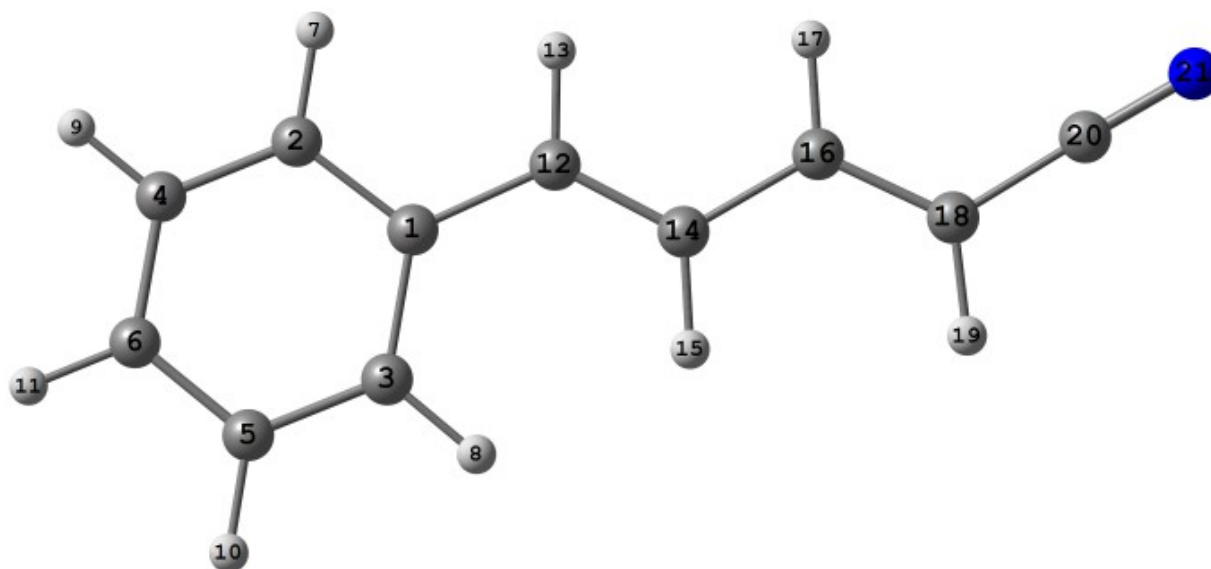

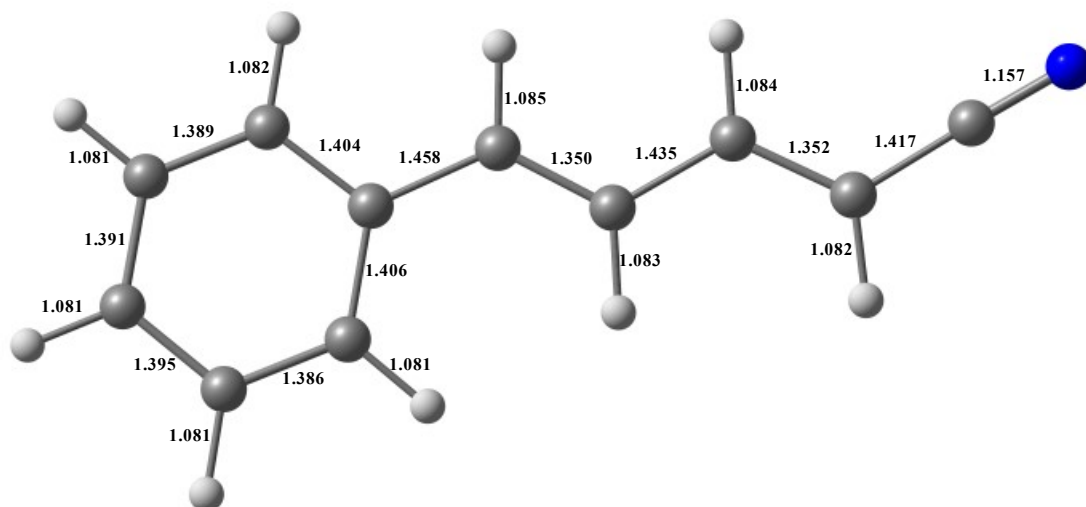

**Summary of Natural Population Analysis:**  
Natural Population

| Natural   |        | -----    |          |          |         |          |
|-----------|--------|----------|----------|----------|---------|----------|
| Atom No   | Charge | Core     | Valence  | Rydberg  | Total   |          |
| -----     |        |          |          |          |         |          |
| C         | 1      | -0.10389 | 1.99901  | 4.08508  | 0.01980 | 6.10389  |
| C         | 2      | -0.17890 | 1.99908  | 4.16068  | 0.01914 | 6.17890  |
| C         | 3      | -0.18192 | 1.99907  | 4.16476  | 0.01810 | 6.18192  |
| C         | 4      | -0.21349 | 1.99915  | 4.19394  | 0.02040 | 6.21349  |
| C         | 5      | -0.20927 | 1.99916  | 4.18983  | 0.02028 | 6.20927  |
| C         | 6      | -0.19733 | 1.99916  | 4.17757  | 0.02060 | 6.19733  |
| H         | 7      | 0.22272  | 0.00000  | 0.77543  | 0.00185 | 0.77728  |
| H         | 8      | 0.22114  | 0.00000  | 0.77707  | 0.00179 | 0.77886  |
| H         | 9      | 0.22380  | 0.00000  | 0.77453  | 0.00168 | 0.77620  |
| H         | 10     | 0.22318  | 0.00000  | 0.77515  | 0.00167 | 0.77682  |
| H         | 11     | 0.22253  | 0.00000  | 0.77592  | 0.00155 | 0.77747  |
| C         | 12     | -0.12377 | 1.99907  | 4.10545  | 0.01925 | 6.12377  |
| H         | 13     | 0.21740  | 0.00000  | 0.78051  | 0.00209 | 0.78260  |
| C         | 14     | -0.23748 | 1.99904  | 4.21905  | 0.01938 | 6.23748  |
| H         | 15     | 0.21767  | 0.00000  | 0.77885  | 0.00348 | 0.78233  |
| C         | 16     | -0.10670 | 1.99909  | 4.08850  | 0.01911 | 6.10670  |
| H         | 17     | 0.22661  | 0.00000  | 0.77152  | 0.00188 | 0.77339  |
| C         | 18     | -0.35818 | 1.99891  | 4.34359  | 0.01567 | 6.35818  |
| H         | 19     | 0.25576  | 0.00000  | 0.74221  | 0.00203 | 0.74424  |
| C         | 20     | 0.32224  | 1.99931  | 3.64458  | 0.03387 | 5.67776  |
| N         | 21     | -0.44211 | 1.99957  | 5.41448  | 0.02806 | 7.44211  |
| * Total * |        | 0.00000  | 23.98962 | 57.73871 | 0.27167 | 82.00000 |

A6

Energy E(B3LYP) = -479.860288584 h,  $G^{298} = -479.722142$  h,  $\mu=14.1$  D

Cartesian coordinates, Å

| N  | atom | x         | y         | z         |
|----|------|-----------|-----------|-----------|
| 1  | C    | -1.501665 | -0.240262 | 0.000118  |
| 2  | C    | -2.425951 | -1.300995 | 0.000117  |
| 3  | C    | -1.991900 | 1.079943  | 0.000123  |
| 4  | C    | -3.791000 | -1.054581 | 0.000134  |
| 5  | C    | -3.354653 | 1.321734  | 0.000131  |
| 6  | C    | -4.258132 | 0.256970  | 0.000137  |
| 7  | H    | -2.060691 | -2.319119 | 0.000108  |
| 8  | H    | -1.307590 | 1.915554  | 0.000109  |
| 9  | H    | -4.488602 | -1.879980 | 0.000137  |
| 10 | H    | -3.719684 | 2.338998  | 0.000127  |
| 11 | H    | -5.321374 | 0.452441  | 0.000141  |
| 12 | C    | -0.091309 | -0.560336 | 0.000094  |
| 13 | H    | 0.141918  | -1.619645 | -0.000007 |
| 14 | C    | 0.957944  | 0.306544  | 0.000143  |
| 15 | H    | 0.804933  | 1.377137  | 0.000251  |
| 16 | C    | 2.288754  | -0.174260 | -0.000002 |
| 17 | H    | 2.433019  | -1.247683 | -0.000128 |
| 18 | C    | 3.394668  | 0.635488  | 0.000033  |
| 19 | H    | 3.333167  | 1.715371  | 0.000142  |
| 20 | C    | 4.667171  | 0.100272  | -0.000146 |
| 21 | N    | 5.736324  | -0.322772 | -0.001122 |
| 22 | H    | 6.667070  | -0.696777 | 0.001681  |

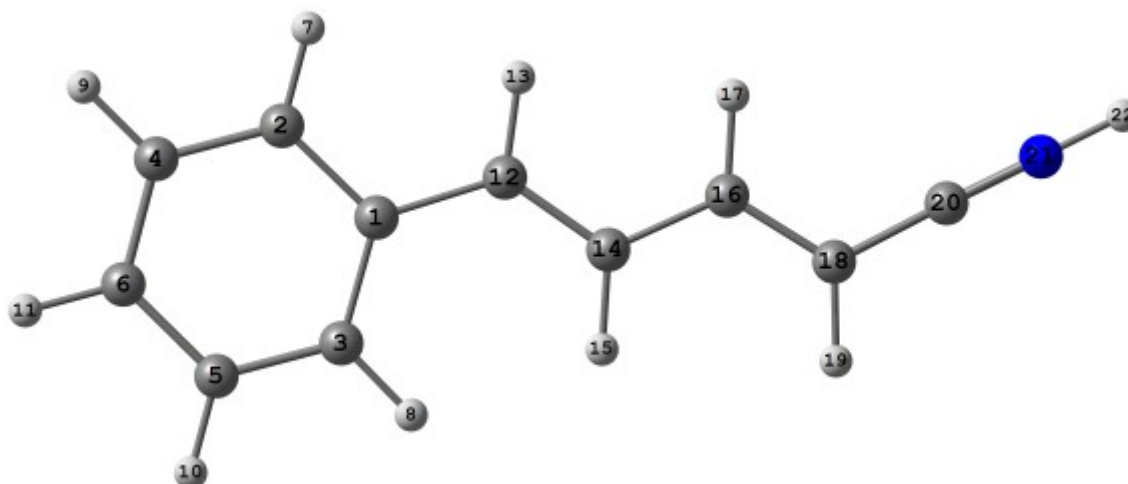

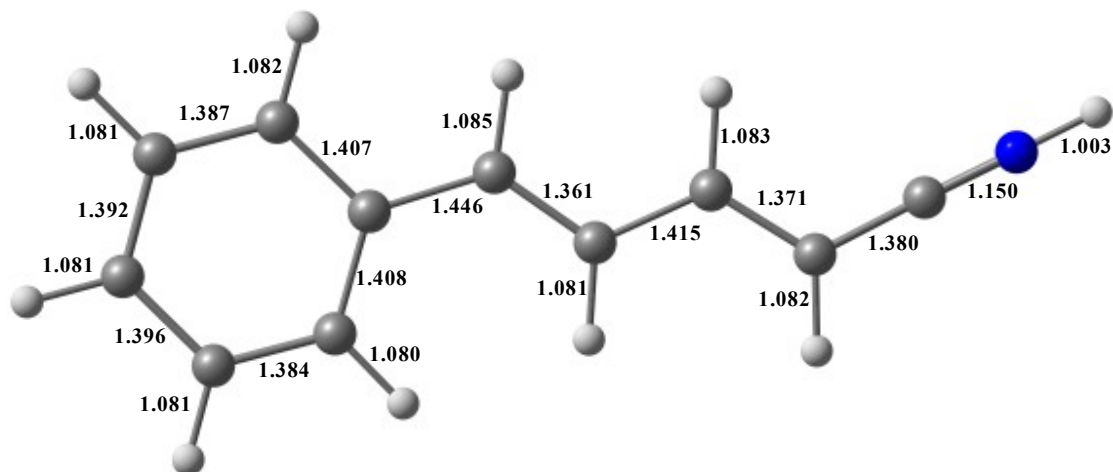

### Summary of Natural Population Analysis:

#### Natural Population

| Atom | No | Natural Charge | Core    | Valence | Rydberg | Total   |
|------|----|----------------|---------|---------|---------|---------|
| C    | 1  | -0.12129       | 1.99901 | 4.10258 | 0.01970 | 6.12129 |
| C    | 2  | -0.15588       | 1.99909 | 4.13786 | 0.01893 | 6.15588 |
| C    | 3  | -0.16073       | 1.99907 | 4.14380 | 0.01787 | 6.16073 |
| C    | 4  | -0.21501       | 1.99915 | 4.19560 | 0.02027 | 6.21501 |
| C    | 5  | -0.20977       | 1.99916 | 4.19046 | 0.02015 | 6.20977 |
| C    | 6  | -0.16624       | 1.99916 | 4.14691 | 0.02016 | 6.16624 |
| H    | 7  | 0.22723        | 0.00000 | 0.77097 | 0.00179 | 0.77277 |
| H    | 8  | 0.22494        | 0.00000 | 0.77329 | 0.00176 | 0.77506 |
| H    | 9  | 0.22791        | 0.00000 | 0.77043 | 0.00166 | 0.77209 |
| H    | 10 | 0.22721        | 0.00000 | 0.77114 | 0.00166 | 0.77279 |
| H    | 11 | 0.22516        | 0.00000 | 0.77335 | 0.00149 | 0.77484 |
| C    | 12 | -0.05216       | 1.99909 | 4.03422 | 0.01885 | 6.05216 |
| H    | 13 | 0.22524        | 0.00000 | 0.77277 | 0.00199 | 0.77476 |
| C    | 14 | -0.26250       | 1.99905 | 4.24382 | 0.01964 | 6.26250 |
| H    | 15 | 0.22883        | 0.00000 | 0.76772 | 0.00344 | 0.77117 |
| C    | 16 | -0.02386       | 1.99911 | 4.00631 | 0.01845 | 6.02386 |
| H    | 17 | 0.23716        | 0.00000 | 0.76104 | 0.00180 | 0.76284 |
| C    | 18 | -0.42808       | 1.99896 | 4.41272 | 0.01640 | 6.42808 |
| H    | 19 | 0.28792        | 0.00000 | 0.71019 | 0.00188 | 0.71208 |
| C    | 20 | 0.61839        | 1.99919 | 3.36366 | 0.01876 | 5.38161 |
| N    | 21 | -0.45297       | 1.99902 | 5.44419 | 0.00976 | 7.45297 |



H 22 0.51851 0.00000 0.47889 0.00259 0.48149

---

---

\* Total \* 1.00000 23.98905 57.77194 0.23901 82.00000

C6

Energy E(B3LYP) = -480.244662979 h,  $G^{298}$  = -480.093829 h,  $\mu$ =17.3 D

Cartesian coordinates, Å

| N  | atom | x         | y         | z         |
|----|------|-----------|-----------|-----------|
| 1  | C    | 1.509973  | -0.256505 | 0.054384  |
| 2  | C    | 2.467606  | -1.312577 | 0.049509  |
| 3  | C    | 1.960990  | 1.089239  | -0.080235 |
| 4  | C    | 3.808595  | -1.034699 | -0.082243 |
| 5  | C    | 3.303340  | 1.351454  | -0.208507 |
| 6  | C    | 4.224510  | 0.294228  | -0.209547 |
| 7  | H    | 2.123980  | -2.332075 | 0.150594  |
| 8  | H    | 1.254491  | 1.904490  | -0.079798 |
| 9  | H    | 4.535668  | -1.832508 | -0.086634 |
| 10 | H    | 3.652241  | 2.368130  | -0.308105 |
| 11 | H    | 5.278437  | 0.512620  | -0.310616 |
| 12 | C    | 0.163095  | -0.599697 | 0.197735  |
| 13 | H    | -0.059203 | -1.655356 | 0.301978  |
| 14 | C    | -0.948795 | 0.280695  | 0.219535  |
| 15 | H    | -0.808271 | 1.345557  | 0.107434  |
| 16 | C    | -2.186113 | -0.229163 | 0.387839  |
| 17 | H    | -2.327958 | -1.295154 | 0.503315  |
| 18 | C    | -3.406868 | 0.644991  | 0.489225  |
| 19 | H    | -3.248996 | 1.641745  | 0.074252  |
| 20 | H    | -3.681050 | 0.772071  | 1.545216  |
| 21 | C    | -4.569280 | 0.078457  | -0.163153 |
| 22 | N    | -5.483204 | -0.360304 | -0.671567 |
| 23 | H    | -6.299233 | -0.745921 | -1.123927 |

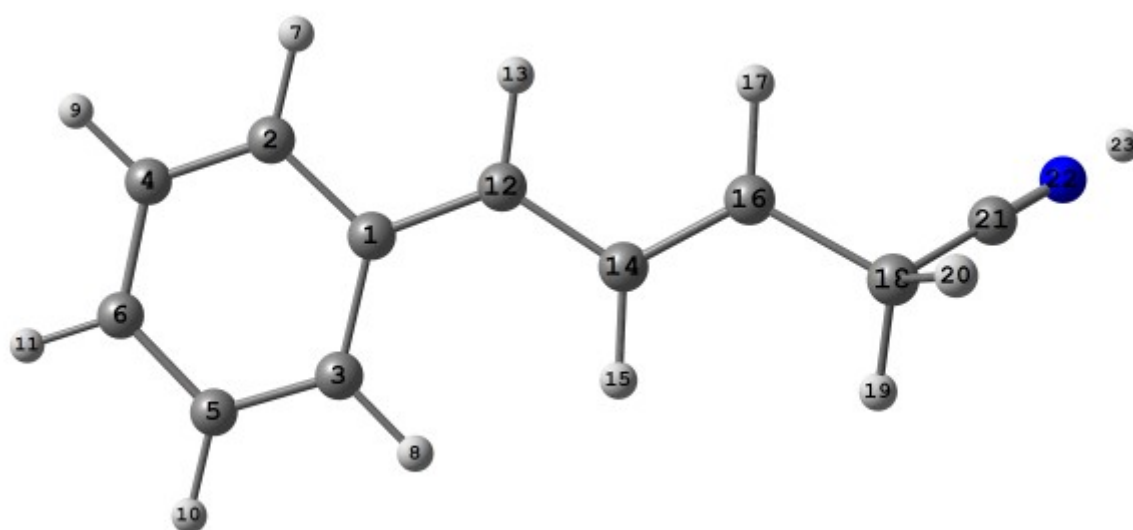

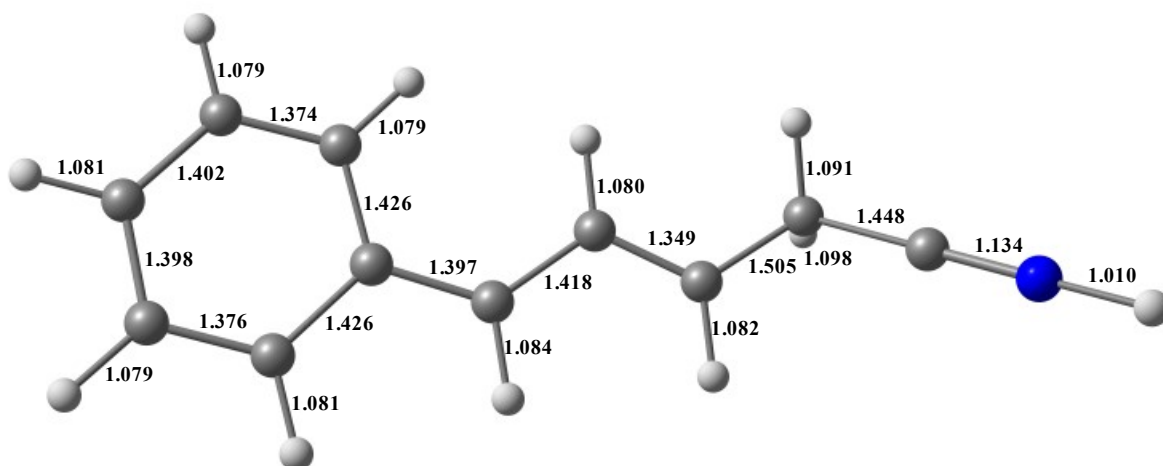

**Summary of Natural Population Analysis:**  
Natural Population

| Natural   |          | -----    |          |         |          |  |
|-----------|----------|----------|----------|---------|----------|--|
| Atom No   | Charge   | Core     | Valence  | Rydberg | Total    |  |
| -----     |          |          |          |         |          |  |
| C 1       | -0.14116 | 1.99900  | 4.12250  | 0.01966 | 6.14116  |  |
| C 2       | -0.07176 | 1.99909  | 4.05429  | 0.01838 | 6.07176  |  |
| C 3       | -0.08792 | 1.99908  | 4.07148  | 0.01736 | 6.08792  |  |
| C 4       | -0.22236 | 1.99914  | 4.20313  | 0.02010 | 6.22236  |  |
| C 5       | -0.21500 | 1.99915  | 4.19584  | 0.02001 | 6.21500  |  |
| C 6       | -0.05901 | 1.99918  | 4.04075  | 0.01908 | 6.05901  |  |
| H 7       | 0.24601  | 0.00000  | 0.75236  | 0.00164 | 0.75399  |  |
| H 8       | 0.24244  | 0.00000  | 0.75589  | 0.00167 | 0.75756  |  |
| H 9       | 0.24731  | 0.00000  | 0.75110  | 0.00158 | 0.75269  |  |
| H 10      | 0.24656  | 0.00000  | 0.75187  | 0.00157 | 0.75344  |  |
| H 11      | 0.24213  | 0.00000  | 0.75656  | 0.00132 | 0.75787  |  |
| C 12      | 0.09932  | 1.99910  | 3.88287  | 0.01871 | 5.90068  |  |
| H 13      | 0.24943  | 0.00000  | 0.74872  | 0.00185 | 0.75057  |  |
| C 14      | -0.25873 | 1.99900  | 4.23981  | 0.01992 | 6.25873  |  |
| H 15      | 0.25404  | 0.00000  | 0.74288  | 0.00308 | 0.74596  |  |
| C 16      | 0.02654  | 1.99908  | 3.95840  | 0.01599 | 5.97346  |  |
| H 17      | 0.25574  | 0.00000  | 0.74243  | 0.00182 | 0.74426  |  |
| C 18      | -0.57114 | 1.99909  | 4.55617  | 0.01587 | 6.57114  |  |
| H 19      | 0.31415  | 0.00000  | 0.68432  | 0.00154 | 0.68585  |  |
| H 20      | 0.33295  | 0.00000  | 0.66554  | 0.00151 | 0.66705  |  |
| C 21      | 0.67915  | 1.99918  | 3.30255  | 0.01913 | 5.32085  |  |
| N 22      | -0.36774 | 1.99891  | 5.35879  | 0.01004 | 7.36774  |  |
| H 23      | 0.55907  | 0.00000  | 0.43849  | 0.00244 | 0.44093  |  |
| =====     |          |          |          |         |          |  |
| * Total * | 2.00000  | 23.98901 | 57.77673 | 0.23426 | 82.00000 |  |

B6

Energy E(B3LYP) = -480.234982253 h,  $G^{298} = -480.085804$  h,  $\mu=11.9$  D

Cartesian coordinates, Å

| N  | atom | x         | y         | z         |
|----|------|-----------|-----------|-----------|
| 1  | C    | -1.448047 | -0.272045 | 0.220502  |
| 2  | C    | -2.380699 | -1.323114 | -0.061223 |
| 3  | C    | -1.877154 | 1.089173  | 0.107917  |
| 4  | C    | -3.668576 | -1.025161 | -0.431296 |
| 5  | C    | -3.167734 | 1.367149  | -0.260538 |
| 6  | C    | -4.058638 | 0.315406  | -0.529996 |
| 7  | H    | -2.053257 | -2.349087 | 0.023999  |
| 8  | H    | -1.189443 | 1.895454  | 0.308165  |
| 9  | H    | -4.375518 | -1.811949 | -0.645122 |
| 10 | H    | -3.502526 | 2.389246  | -0.349642 |
| 11 | H    | -5.072399 | 0.549085  | -0.824508 |
| 12 | C    | -0.171474 | -0.635873 | 0.593328  |
| 13 | H    | 0.039226  | -1.699048 | 0.636020  |
| 14 | C    | 0.941223  | 0.255204  | 0.991177  |
| 15 | H    | 0.775483  | 1.299638  | 0.750254  |
| 16 | C    | 2.276616  | -0.223797 | 0.516575  |
| 17 | H    | 2.510682  | -1.271992 | 0.653432  |
| 18 | C    | 3.177238  | 0.599583  | -0.038603 |
| 19 | H    | 3.008302  | 1.654474  | -0.210191 |
| 20 | H    | 0.964983  | 0.183564  | 2.094539  |
| 21 | C    | 4.431893  | 0.112874  | -0.436936 |
| 22 | N    | 5.457985  | -0.257568 | -0.770957 |
| 23 | H    | 6.360689  | -0.592805 | -1.065691 |

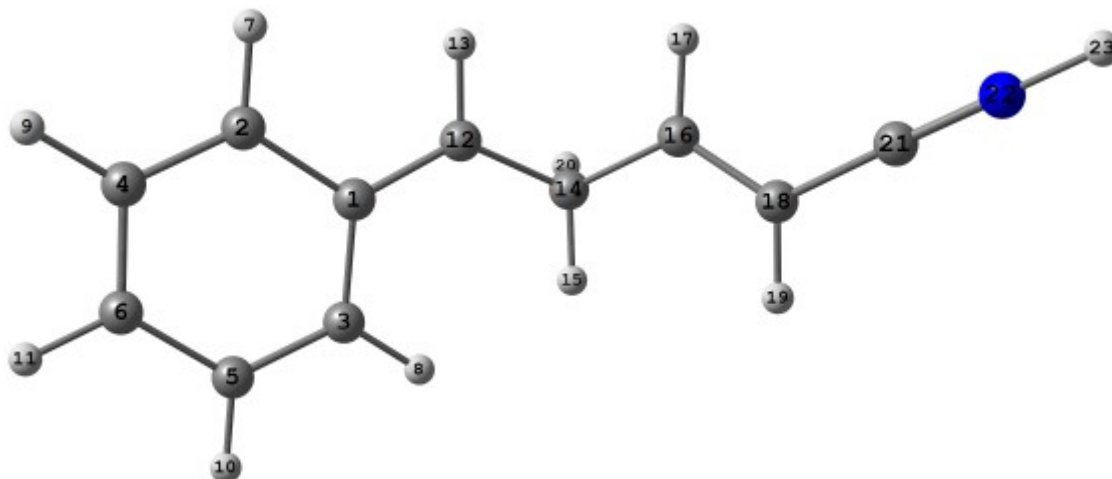

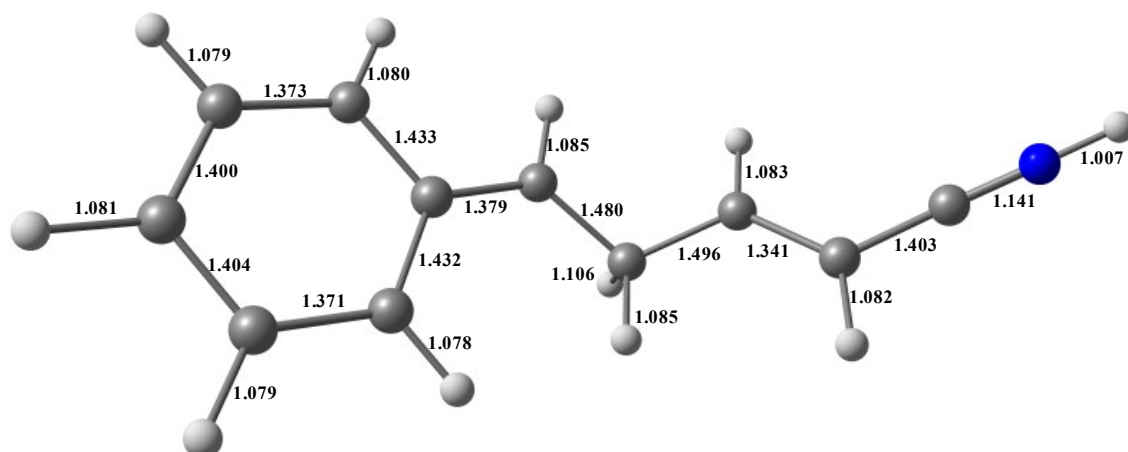

**Summary of Natural Population Analysis:**  
Natural Population

| Natural   |        | -----    |          |          |         |          |
|-----------|--------|----------|----------|----------|---------|----------|
| Atom No   | Charge | Core     | Valence  | Rydberg  | Total   |          |
| C         | 1      | -0.16899 | 1.99898  | 4.15031  | 0.01971 | 6.16899  |
| C         | 2      | -0.03837 | 1.99910  | 4.02088  | 0.01839 | 6.03837  |
| C         | 3      | -0.06110 | 1.99908  | 4.04481  | 0.01721 | 6.06110  |
| C         | 4      | -0.22659 | 1.99914  | 4.20740  | 0.02005 | 6.22659  |
| C         | 5      | -0.21599 | 1.99915  | 4.19687  | 0.01997 | 6.21599  |
| C         | 6      | -0.02624 | 1.99919  | 4.00830  | 0.01875 | 6.02624  |
| H         | 7      | 0.24880  | 0.00000  | 0.74953  | 0.00167 | 0.75120  |
| H         | 8      | 0.24290  | 0.00000  | 0.75538  | 0.00172 | 0.75710  |
| H         | 9      | 0.25135  | 0.00000  | 0.74706  | 0.00159 | 0.74865  |
| H         | 10     | 0.25056  | 0.00000  | 0.74786  | 0.00158 | 0.74944  |
| H         | 11     | 0.24513  | 0.00000  | 0.75358  | 0.00129 | 0.75487  |
| C         | 12     | 0.20271  | 1.99908  | 3.78197  | 0.01623 | 5.79729  |
| H         | 13     | 0.24722  | 0.00000  | 0.75089  | 0.00188 | 0.75278  |
| C         | 14     | -0.52219 | 1.99915  | 4.50342  | 0.01962 | 6.52219  |
| H         | 15     | 0.25522  | 0.00000  | 0.74204  | 0.00275 | 0.74478  |
| C         | 16     | 0.02577  | 1.99908  | 3.95822  | 0.01694 | 5.97423  |
| H         | 17     | 0.25431  | 0.00000  | 0.74398  | 0.00171 | 0.74569  |
| C         | 18     | -0.37299 | 1.99890  | 4.35841  | 0.01568 | 6.37299  |
| H         | 19     | 0.29952  | 0.00000  | 0.69867  | 0.00181 | 0.70048  |
| H         | 20     | 0.32067  | 0.00000  | 0.67766  | 0.00167 | 0.67933  |
| C         | 21     | 0.63759  | 1.99918  | 3.34479  | 0.01844 | 5.36241  |
| N         | 22     | -0.37719 | 1.99899  | 5.36970  | 0.00850 | 7.37719  |
| H         | 23     | 0.52793  | 0.00000  | 0.46964  | 0.00243 | 0.47207  |
| * Total * |        | 2.00000  | 23.98903 | 57.78137 | 0.22960 | 82.00000 |

D6

Energy E(B3LYP) = -480.553283353 h,  $G^{298} = -480.393548$  h,  $\mu=21.9$  D

Cartesian coordinates, Å

| N  | atom | x         | y         | z         |
|----|------|-----------|-----------|-----------|
| 1  | C    | -1.553080 | -0.296065 | 0.117643  |
| 2  | C    | -2.548615 | -1.327611 | -0.044464 |
| 3  | C    | -1.962512 | 1.084068  | 0.085114  |
| 4  | C    | -3.863834 | -0.992661 | -0.217297 |
| 5  | C    | -3.281484 | 1.393481  | -0.090237 |
| 6  | C    | -4.227787 | 0.361924  | -0.239894 |
| 7  | H    | -2.236082 | -2.361345 | -0.021383 |
| 8  | H    | -1.238519 | 1.875900  | 0.192850  |
| 9  | H    | -4.616467 | -1.756639 | -0.335064 |
| 10 | H    | -3.603311 | 2.422922  | -0.117965 |
| 11 | H    | -5.267661 | 0.623961  | -0.378434 |
| 12 | C    | -0.261476 | -0.706179 | 0.294386  |
| 13 | H    | -0.060767 | -1.770378 | 0.304747  |
| 14 | C    | 0.913152  | 0.182074  | 0.510862  |
| 15 | H    | 0.757228  | 1.253799  | 0.434622  |
| 16 | C    | 2.189329  | -0.271317 | 0.060501  |
| 17 | H    | 2.353645  | -1.335512 | -0.094399 |
| 18 | C    | 3.292497  | 0.671905  | -0.155259 |
| 19 | H    | 3.274472  | 1.524024  | 0.534283  |
| 20 | H    | 1.197261  | 0.032639  | 1.610628  |
| 21 | H    | 3.087418  | 1.127730  | -1.146831 |
| 22 | C    | 4.629477  | 0.101934  | -0.193139 |
| 23 | N    | 5.681788  | -0.310044 | -0.216405 |
| 24 | H    | 6.626265  | -0.676119 | -0.237513 |

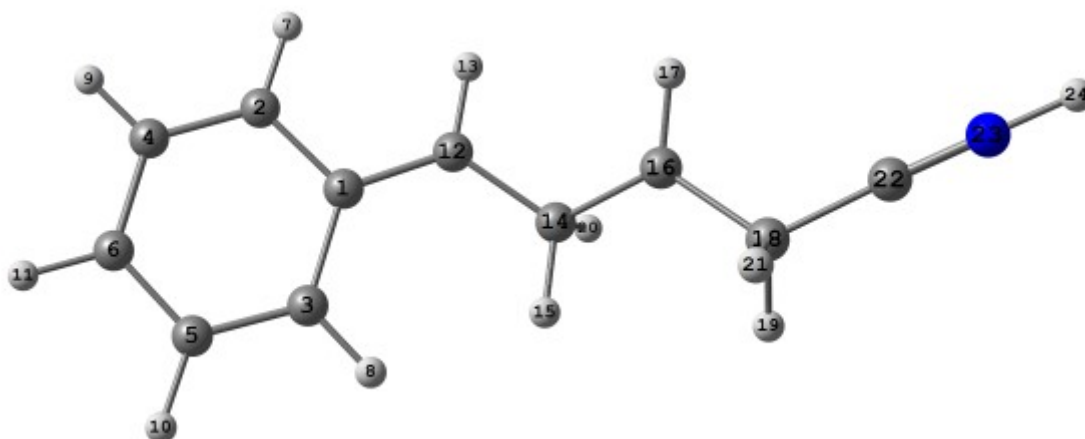

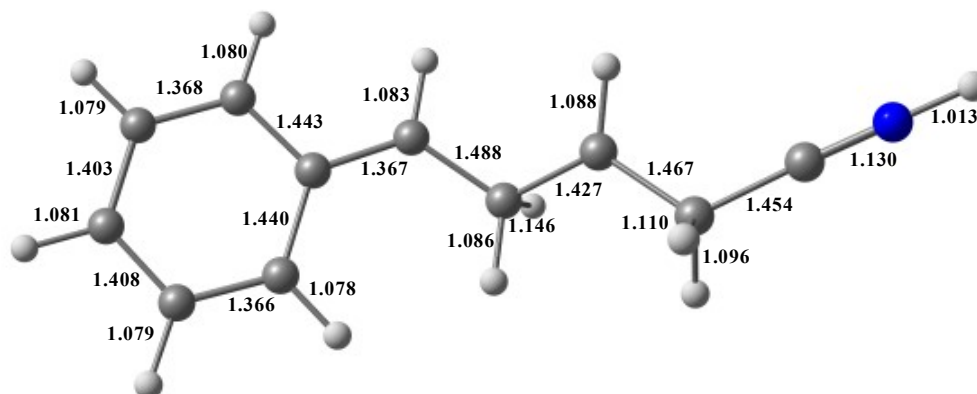

### Summary of Natural Population Analysis:

#### Natural Population

| Natural |        | -----    |         |         |         |         |
|---------|--------|----------|---------|---------|---------|---------|
| Atom No | Charge | Core     | Valence | Rydberg | Total   |         |
| -----   |        |          |         |         |         |         |
| C       | 1      | -0.12922 | 1.99898 | 4.11074 | 0.01950 | 6.12922 |
| C       | 2      | -0.02157 | 1.99910 | 4.00425 | 0.01822 | 6.02157 |
| C       | 3      | -0.05185 | 1.99908 | 4.03581 | 0.01696 | 6.05185 |
| C       | 4      | -0.22438 | 1.99914 | 4.20518 | 0.02006 | 6.22438 |
| C       | 5      | -0.21246 | 1.99915 | 4.19318 | 0.02013 | 6.21246 |
| C       | 6      | 0.02005  | 1.99920 | 3.96220 | 0.01855 | 5.97995 |
| H       | 7      | 0.25523  | 0.00000 | 0.74313 | 0.00165 | 0.74477 |
| H       | 8      | 0.24648  | 0.00000 | 0.75172 | 0.00180 | 0.75352 |
| H       | 9      | 0.25844  | 0.00000 | 0.74000 | 0.00155 | 0.74156 |
| H       | 10     | 0.25769  | 0.00000 | 0.74077 | 0.00154 | 0.74231 |
| H       | 11     | 0.25004  | 0.00000 | 0.74871 | 0.00125 | 0.74996 |
| C       | 12     | 0.13608  | 1.99903 | 3.84708 | 0.01781 | 5.86392 |
| H       | 13     | 0.26989  | 0.00000 | 0.72828 | 0.00183 | 0.73011 |
| C       | 14     | -0.57888 | 1.99906 | 4.55657 | 0.02325 | 6.57888 |
| H       | 15     | 0.31076  | 0.00000 | 0.68760 | 0.00164 | 0.68924 |
| C       | 16     | 0.42280  | 1.99920 | 3.56439 | 0.01362 | 5.57720 |
| H       | 17     | 0.29874  | 0.00000 | 0.69916 | 0.00210 | 0.70126 |
| C       | 18     | -0.64214 | 1.99901 | 4.62644 | 0.01669 | 6.64214 |
| H       | 19     | 0.36722  | 0.00000 | 0.63125 | 0.00153 | 0.63278 |
| H       | 20     | 0.43673  | 0.00000 | 0.56133 | 0.00195 | 0.56327 |
| H       | 21     | 0.40257  | 0.00000 | 0.59588 | 0.00155 | 0.59743 |
| C       | 22     | 0.68200  | 1.99917 | 3.30011 | 0.01873 | 5.31800 |
| N       | 23     | -0.30085 | 1.99895 | 5.29327 | 0.00863 | 7.30085 |

|             |         |          |          |         |          |
|-------------|---------|----------|----------|---------|----------|
| H 24        | 0.54666 | 0.00000  | 0.45099  | 0.00235 | 0.45334  |
| <hr/> <hr/> |         |          |          |         |          |
| * Total *   | 3.00000 | 23.98908 | 57.77803 | 0.23289 | 82.00000 |

11

Energy E(B3LYP) = -591.759791298 h,  $G^{298}$  = -591.629106 h,  $\mu$  = 10.1 D

Cartesian coordinates, Å

| N  | atom | x         | y         | z         |
|----|------|-----------|-----------|-----------|
| 1  | C    | -1.967801 | 0.232983  | 0.000005  |
| 2  | C    | -2.915505 | 1.270563  | 0.000050  |
| 3  | C    | -2.432174 | -1.094943 | -0.000038 |
| 4  | C    | -4.276597 | 0.995693  | 0.000057  |
| 5  | C    | -3.790680 | -1.366822 | -0.000033 |
| 6  | C    | -4.718508 | -0.324025 | 0.000016  |
| 7  | H    | -2.573254 | 2.296971  | 0.000080  |
| 8  | H    | -1.731199 | -1.917047 | -0.000082 |
| 9  | H    | -4.990147 | 1.807749  | 0.000093  |
| 10 | H    | -4.131845 | -2.392680 | -0.000069 |
| 11 | H    | -5.777413 | -0.542060 | 0.000020  |
| 12 | C    | -0.556926 | 0.583890  | 0.000007  |
| 13 | H    | -0.347290 | 1.648207  | -0.000008 |
| 14 | C    | 0.502539  | -0.259542 | 0.000029  |
| 15 | H    | 0.360387  | -1.332259 | 0.000051  |
| 16 | C    | 1.844044  | 0.230497  | 0.000027  |
| 17 | H    | 2.000158  | 1.301583  | 0.000009  |
| 18 | C    | 2.928552  | -0.569424 | 0.000048  |
| 19 | H    | 2.914823  | -1.645535 | 0.000065  |
| 20 | N    | 4.247582  | -0.030049 | 0.000046  |
| 21 | O    | 4.422549  | 1.194222  | -0.000109 |
| 22 | O    | 5.182582  | -0.845197 | -0.000075 |

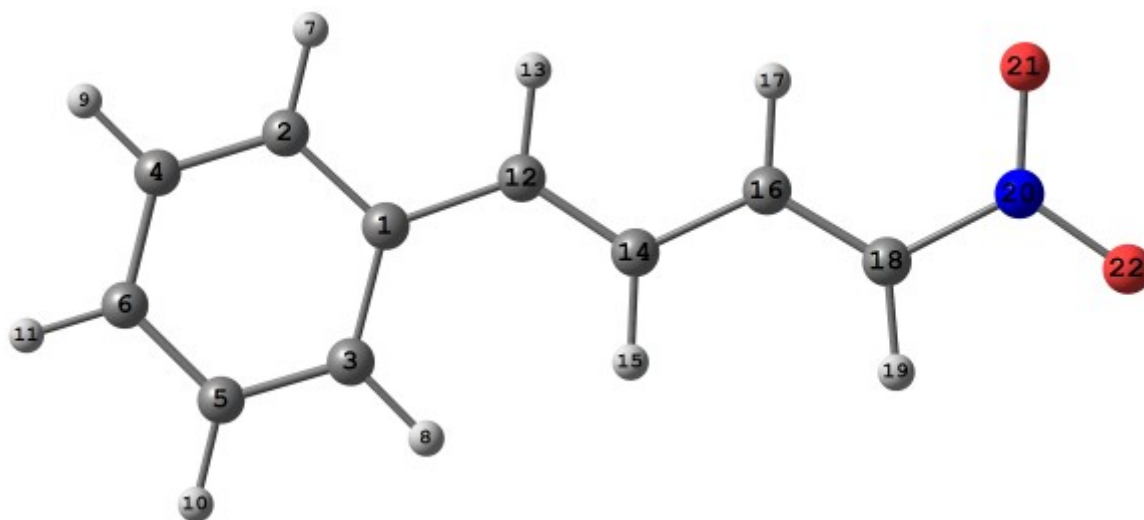



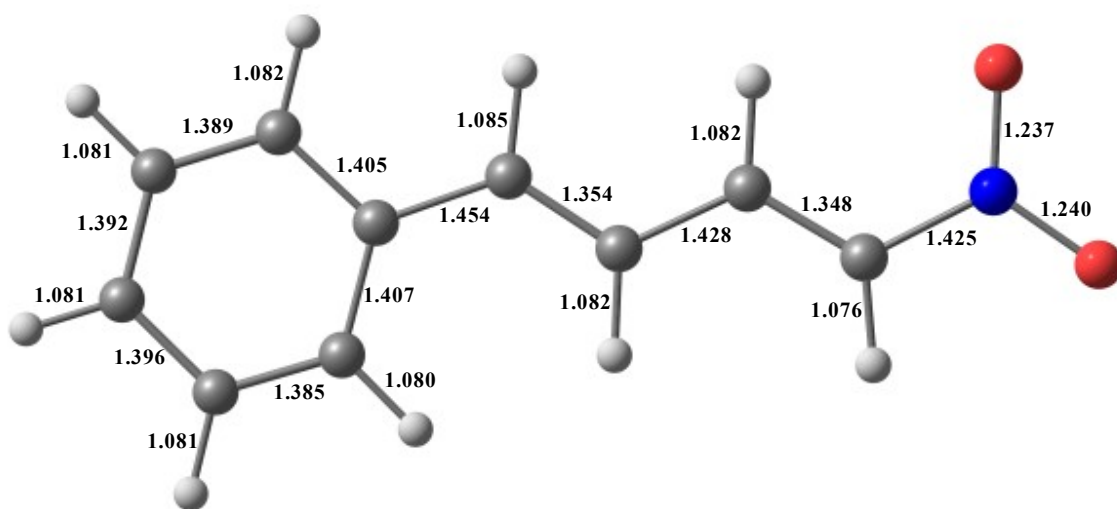

### Summary of Natural Population Analysis:

#### Natural Population

| Atom | No | Charge   | Core    | Valence | Rydberg | Total   |
|------|----|----------|---------|---------|---------|---------|
| C    | 1  | -0.11303 | 1.99901 | 4.09425 | 0.01977 | 6.11303 |
| C    | 2  | -0.16771 | 1.99908 | 4.14960 | 0.01902 | 6.16771 |
| C    | 3  | -0.17292 | 1.99907 | 4.15585 | 0.01800 | 6.17292 |
| C    | 4  | -0.21198 | 1.99915 | 4.19250 | 0.02033 | 6.21198 |
| C    | 5  | -0.20746 | 1.99916 | 4.18809 | 0.02021 | 6.20746 |
| C    | 6  | -0.18281 | 1.99916 | 4.16327 | 0.02038 | 6.18281 |
| H    | 7  | 0.22470  | 0.00000 | 0.77348 | 0.00182 | 0.77530 |
| H    | 8  | 0.22294  | 0.00000 | 0.77528 | 0.00178 | 0.77706 |
| H    | 9  | 0.22518  | 0.00000 | 0.77315 | 0.00167 | 0.77482 |
| H    | 10 | 0.22462  | 0.00000 | 0.77372 | 0.00166 | 0.77538 |
| H    | 11 | 0.22348  | 0.00000 | 0.77500 | 0.00152 | 0.77652 |
| C    | 12 | -0.09904 | 1.99908 | 4.08088 | 0.01909 | 6.09904 |
| H    | 13 | 0.22268  | 0.00000 | 0.77530 | 0.00202 | 0.77732 |
| C    | 14 | -0.23833 | 1.99906 | 4.22012 | 0.01915 | 6.23833 |
| H    | 15 | 0.22358  | 0.00000 | 0.77294 | 0.00348 | 0.77642 |
| C    | 16 | -0.12515 | 1.99909 | 4.10569 | 0.02036 | 6.12515 |
| H    | 17 | 0.24366  | 0.00000 | 0.75358 | 0.00276 | 0.75634 |
| C    | 18 | -0.08977 | 1.99895 | 4.06802 | 0.02280 | 6.08977 |
| H    | 19 | 0.23923  | 0.00000 | 0.75843 | 0.00234 | 0.76077 |
| N    | 20 | 0.47549  | 1.99948 | 4.47517 | 0.04986 | 6.52451 |
| O    | 21 | -0.45558 | 1.99980 | 6.43334 | 0.02245 | 8.45558 |

O 22 -0.46179 1.99980 6.44043 0.02155 8.46179

---

---

\* Total \* 0.00000 25.98988 65.69809 0.31204 92.00000

A7

Energy E(B3LYP) = -592.170371091 h,  $G^{298} = -592.027346$  h,  $\mu=2.16$  D

Cartesian coordinates, Å

| N  | atom | x         | y         | z         |
|----|------|-----------|-----------|-----------|
| 1  | C    | 2.019483  | 0.235074  | -0.000001 |
| 2  | C    | 2.977222  | 1.275870  | 0.000104  |
| 3  | C    | 2.469748  | -1.106629 | -0.000112 |
| 4  | C    | 4.329330  | 0.988464  | 0.000107  |
| 5  | C    | 3.821008  | -1.384643 | -0.000112 |
| 6  | C    | 4.751923  | -0.340637 | 0.000000  |
| 7  | H    | 2.638056  | 2.302461  | 0.000185  |
| 8  | H    | 1.761049  | -1.920793 | -0.000201 |
| 9  | H    | 5.054798  | 1.788642  | 0.000191  |
| 10 | H    | 4.161415  | -2.409774 | -0.000199 |
| 11 | H    | 5.808844  | -0.567453 | 0.000000  |
| 12 | C    | 0.640472  | 0.593821  | 0.000013  |
| 13 | H    | 0.430106  | 1.657288  | 0.000074  |
| 14 | C    | -0.449529 | -0.257264 | -0.000033 |
| 15 | H    | -0.318454 | -1.329791 | -0.000085 |
| 16 | C    | -1.736910 | 0.262712  | -0.000004 |
| 17 | H    | -1.874116 | 1.336323  | 0.000052  |
| 18 | C    | -2.872156 | -0.538128 | -0.000044 |
| 19 | H    | -2.864475 | -1.613966 | -0.000101 |
| 20 | N    | -4.091599 | 0.028277  | -0.000007 |
| 21 | O    | -4.381330 | 1.210769  | 0.000086  |
| 22 | O    | -5.110751 | -0.893116 | -0.000014 |
| 23 | H    | -5.922914 | -0.353947 | 0.000048  |

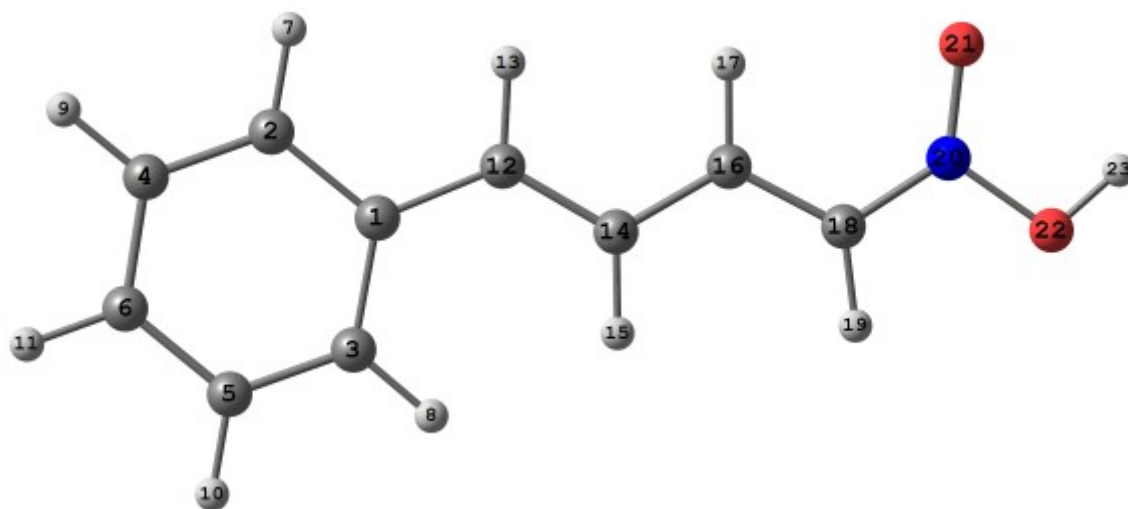

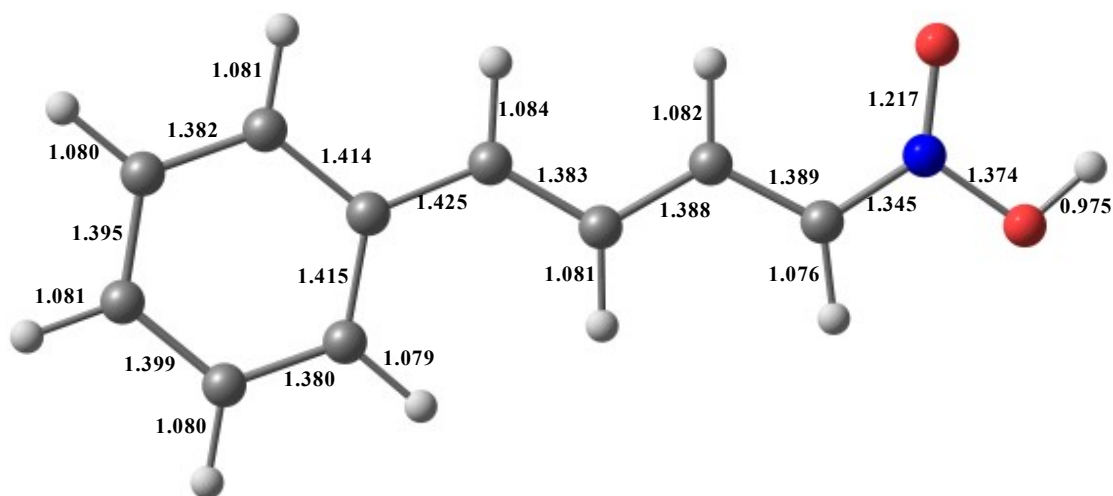

### Summary of Natural Population Analysis:

#### Natural Population

| Natural |          | -----   |         |         |         |
|---------|----------|---------|---------|---------|---------|
| Atom No | Charge   | Core    | Valence | Rydberg | Total   |
| C 1     | -0.12907 | 1.99901 | 4.11038 | 0.01969 | 6.12907 |
| C 2     | -0.11904 | 1.99909 | 4.10135 | 0.01859 | 6.11904 |
| C 3     | -0.12904 | 1.99908 | 4.11239 | 0.01757 | 6.12904 |
| C 4     | -0.21681 | 1.99915 | 4.19756 | 0.02010 | 6.21681 |
| C 5     | -0.21093 | 1.99916 | 4.19177 | 0.02000 | 6.21093 |
| C 6     | -0.12213 | 1.99917 | 4.10338 | 0.01958 | 6.12213 |
| H 7     | 0.23501  | 0.00000 | 0.76328 | 0.00171 | 0.76499 |
| H 8     | 0.23209  | 0.00000 | 0.76619 | 0.00172 | 0.76791 |
| H 9     | 0.23593  | 0.00000 | 0.76244 | 0.00163 | 0.76407 |
| H 10    | 0.23525  | 0.00000 | 0.76313 | 0.00162 | 0.76475 |
| H 11    | 0.23231  | 0.00000 | 0.76627 | 0.00142 | 0.76769 |
| C 12    | 0.01751  | 1.99911 | 3.96471 | 0.01867 | 5.98249 |
| H 13    | 0.23528  | 0.00000 | 0.76283 | 0.00189 | 0.76472 |
| C 14    | -0.24104 | 1.99908 | 4.22299 | 0.01897 | 6.24104 |
| H 15    | 0.23983  | 0.00000 | 0.75695 | 0.00322 | 0.76017 |
| C 16    | -0.05881 | 1.99914 | 4.04102 | 0.01865 | 6.05881 |
| H 17    | 0.25349  | 0.00000 | 0.74404 | 0.00247 | 0.74651 |
| C 18    | -0.06704 | 1.99907 | 4.04543 | 0.02254 | 6.06704 |
| H 19    | 0.26507  | 0.00000 | 0.73311 | 0.00182 | 0.73493 |
| N 20    | 0.43878  | 1.99931 | 4.52385 | 0.03806 | 6.56122 |
| O 21    | -0.37626 | 1.99978 | 6.35377 | 0.02271 | 8.37626 |

|   |    |          |         |         |         |         |
|---|----|----------|---------|---------|---------|---------|
| O | 22 | -0.49714 | 1.99978 | 6.47642 | 0.02094 | 8.49714 |
| H | 23 | 0.54676  | 0.00000 | 0.44984 | 0.00340 | 0.45324 |

---

---

|           |         |          |          |         |          |
|-----------|---------|----------|----------|---------|----------|
| * Total * | 1.00000 | 25.98992 | 65.71311 | 0.29697 | 92.00000 |
|-----------|---------|----------|----------|---------|----------|

C7

Energy E(B3LYP) = -592.533804453 h,  $G^{298}$  = -592.378981 h,  $\mu$  = 11.2 D

Cartesian coordinates, Å

| N  | atom | x         | y         | z         |
|----|------|-----------|-----------|-----------|
| 1  | C    | 2.035623  | -0.244030 | 0.054180  |
| 2  | C    | 3.014563  | -1.281153 | 0.105044  |
| 3  | C    | 2.464022  | 1.106784  | -0.114533 |
| 4  | C    | 4.351882  | -0.980022 | -0.002721 |
| 5  | C    | 3.802989  | 1.391498  | -0.220271 |
| 6  | C    | 4.744242  | 0.353052  | -0.163308 |
| 7  | H    | 2.688246  | -2.303483 | 0.231092  |
| 8  | H    | 1.742322  | 1.907308  | -0.158208 |
| 9  | H    | 5.094922  | -1.761901 | 0.036766  |
| 10 | H    | 4.134756  | 2.410984  | -0.345822 |
| 11 | H    | 5.795918  | 0.589546  | -0.245605 |
| 12 | C    | 0.695149  | -0.608042 | 0.182834  |
| 13 | H    | 0.487132  | -1.663782 | 0.312239  |
| 14 | C    | -0.431644 | 0.257701  | 0.164034  |
| 15 | H    | -0.300196 | 1.320868  | 0.028797  |
| 16 | C    | -1.666183 | -0.258798 | 0.327740  |
| 17 | H    | -1.805421 | -1.322759 | 0.465563  |
| 18 | C    | -2.865318 | 0.613486  | 0.413501  |
| 19 | H    | -2.788137 | 1.552576  | -0.134194 |
| 20 | H    | -3.125408 | 0.849893  | 1.450768  |
| 21 | N    | -4.090409 | -0.061607 | -0.127105 |
| 22 | O    | -4.127916 | -1.140178 | -0.583408 |
| 23 | O    | -5.152102 | 0.707186  | -0.022679 |
| 24 | H    | -5.923071 | 0.213076  | -0.381967 |

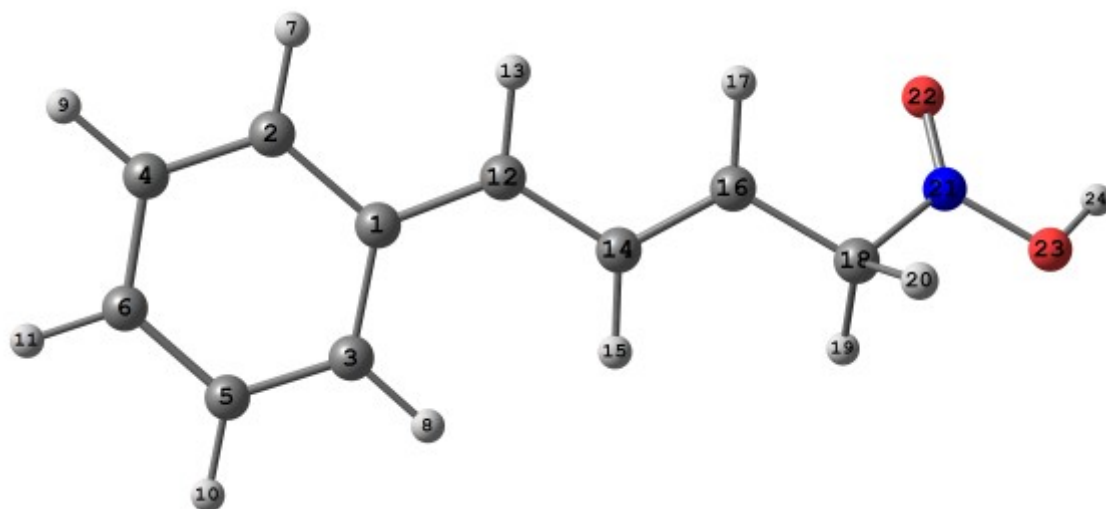

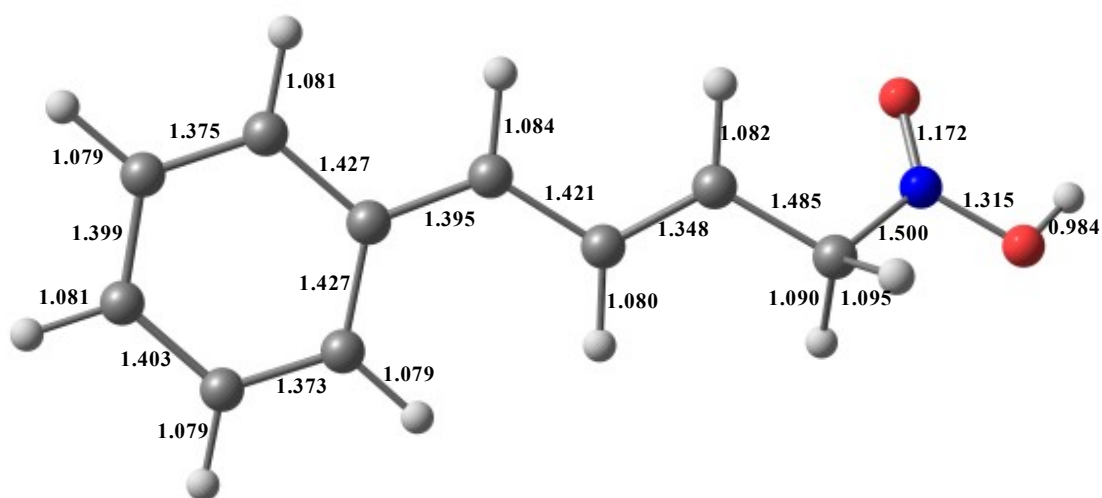

### Summary of Natural Population Analysis:

#### Natural Population

| Atom | No | Natural Charge | Core    | Valence | Rydberg | Total   |
|------|----|----------------|---------|---------|---------|---------|
| C    | 1  | -0.13140       | 1.99901 | 4.11275 | 0.01963 | 6.13140 |
| C    | 2  | -0.06673       | 1.99910 | 4.04939 | 0.01824 | 6.06673 |
| C    | 3  | -0.08263       | 1.99908 | 4.06633 | 0.01723 | 6.08263 |
| C    | 4  | -0.22275       | 1.99914 | 4.20362 | 0.01998 | 6.22275 |
| C    | 5  | -0.21557       | 1.99916 | 4.19651 | 0.01990 | 6.21557 |
| C    | 6  | -0.04917       | 1.99919 | 4.03107 | 0.01891 | 6.04917 |
| H    | 7  | 0.24554        | 0.00000 | 0.75282 | 0.00164 | 0.75446 |
| H    | 8  | 0.24150        | 0.00000 | 0.75683 | 0.00167 | 0.75850 |
| H    | 9  | 0.24757        | 0.00000 | 0.75084 | 0.00159 | 0.75243 |
| H    | 10 | 0.24685        | 0.00000 | 0.75157 | 0.00158 | 0.75315 |
| H    | 11 | 0.24168        | 0.00000 | 0.75700 | 0.00132 | 0.75832 |
| C    | 12 | 0.09717        | 1.99910 | 3.88523 | 0.01850 | 5.90283 |
| H    | 13 | 0.24817        | 0.00000 | 0.74999 | 0.00184 | 0.75183 |
| C    | 14 | -0.23047       | 1.99902 | 4.21212 | 0.01933 | 6.23047 |
| H    | 15 | 0.25164        | 0.00000 | 0.74529 | 0.00307 | 0.74836 |
| C    | 16 | -0.04050       | 1.99909 | 4.02346 | 0.01795 | 6.04050 |
| H    | 17 | 0.26336        | 0.00000 | 0.73436 | 0.00228 | 0.73664 |
| C    | 18 | -0.27961       | 1.99910 | 4.25897 | 0.02154 | 6.27961 |
| H    | 19 | 0.30021        | 0.00000 | 0.69801 | 0.00179 | 0.69979 |
| H    | 20 | 0.31257        | 0.00000 | 0.68567 | 0.00176 | 0.68743 |
| N    | 21 | 0.56964        | 1.99956 | 4.39028 | 0.04052 | 6.43036 |

|   |    |          |         |         |         |         |
|---|----|----------|---------|---------|---------|---------|
| O | 22 | -0.13956 | 1.99974 | 6.11102 | 0.02881 | 8.13956 |
| O | 23 | -0.39034 | 1.99975 | 6.36634 | 0.02426 | 8.39034 |
| H | 24 | 0.58286  | 0.00000 | 0.41447 | 0.00267 | 0.41714 |

---



---

\* Total \*    2.00000    25.99003    65.70393    0.30604    92.00000

**B7**

Energy E(B3LYP) = -592.528451115 h,  $G^{298}$  = -592.374117 h,  $\mu=4.60$  D

Cartesian coordinates, Å

| N  | atom | x         | y         | z         |
|----|------|-----------|-----------|-----------|
| 1  | C    | -1.969564 | -0.269247 | 0.176957  |
| 2  | C    | -2.919038 | -1.289561 | -0.162530 |
| 3  | C    | -2.388283 | 1.100901  | 0.175903  |
| 4  | C    | -4.211696 | -0.954108 | -0.478088 |
| 5  | C    | -3.683791 | 1.415453  | -0.139583 |
| 6  | C    | -4.590725 | 0.393405  | -0.466061 |
| 7  | H    | -2.599931 | -2.321754 | -0.162414 |
| 8  | H    | -1.689292 | 1.885228  | 0.419799  |
| 9  | H    | -4.931167 | -1.716748 | -0.733354 |
| 10 | H    | -4.011110 | 2.443767  | -0.143912 |
| 11 | H    | -5.608874 | 0.656713  | -0.717276 |
| 12 | C    | -0.691839 | -0.672920 | 0.493684  |
| 13 | H    | -0.491144 | -1.737670 | 0.453104  |
| 14 | C    | 0.435712  | 0.180149  | 0.940054  |
| 15 | H    | 0.297388  | 1.237840  | 0.743325  |
| 16 | C    | 1.768320  | -0.310619 | 0.496192  |
| 17 | H    | 1.952140  | -1.378073 | 0.496062  |
| 18 | C    | 2.750567  | 0.525546  | 0.128206  |
| 19 | H    | 2.708252  | 1.599472  | 0.073617  |
| 20 | H    | 0.437929  | 0.069340  | 2.043024  |
| 21 | N    | 3.993543  | -0.016461 | -0.243326 |
| 22 | O    | 4.300681  | -1.163313 | -0.265005 |
| 23 | O    | 4.860292  | 0.936049  | -0.599743 |
| 24 | H    | 5.695238  | 0.481236  | -0.839107 |

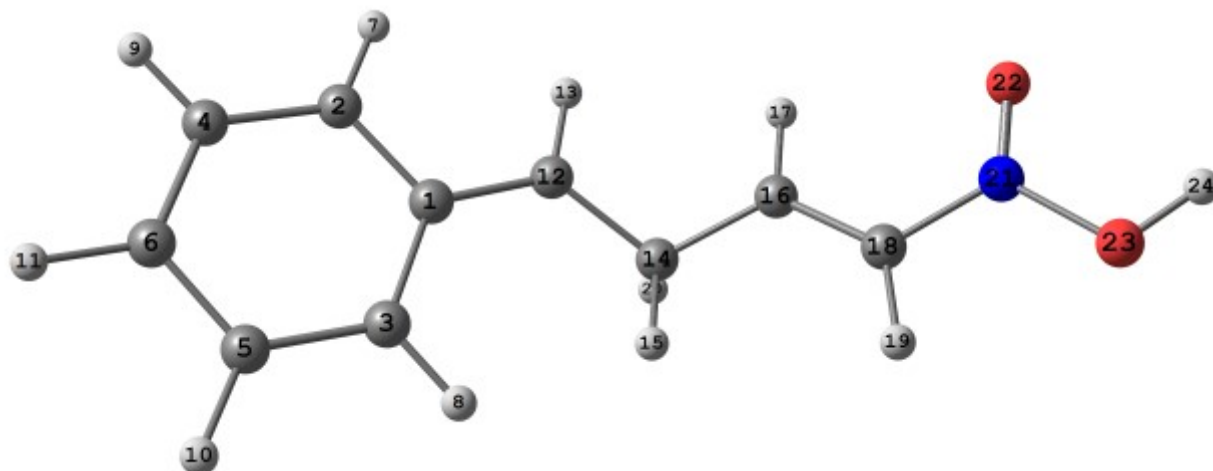

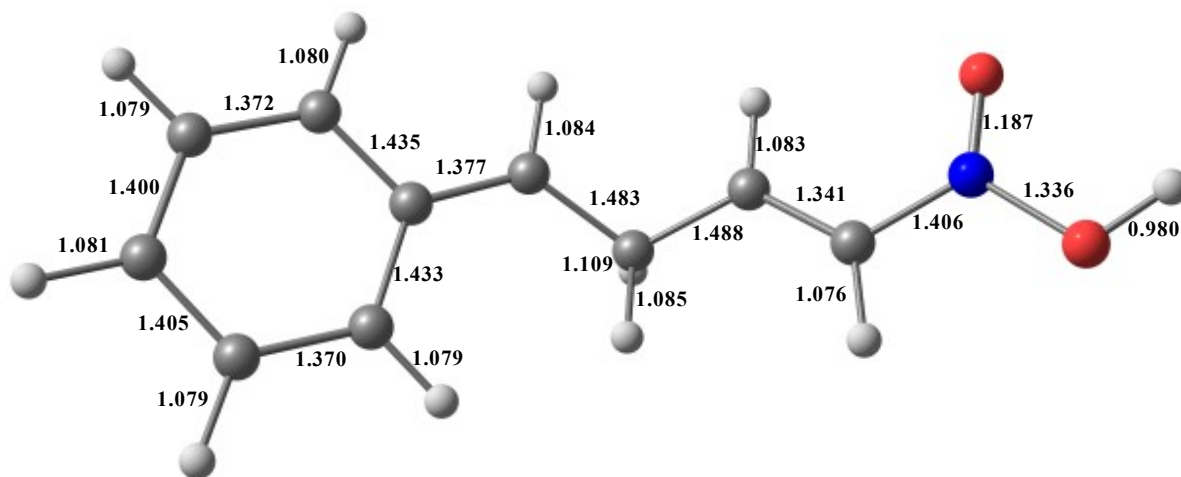

### Summary of Natural Population Analysis:

#### Natural Population

| Atom | No | Natural Charge | Core    | Valence | Rydberg | Total   |
|------|----|----------------|---------|---------|---------|---------|
| C    | 1  | -0.16151       | 1.99898 | 4.14287 | 0.01966 | 6.16151 |
| C    | 2  | -0.03716       | 1.99910 | 4.01971 | 0.01834 | 6.03716 |
| C    | 3  | -0.06294       | 1.99908 | 4.04671 | 0.01715 | 6.06294 |
| C    | 4  | -0.22722       | 1.99914 | 4.20802 | 0.02006 | 6.22722 |
| C    | 5  | -0.21490       | 1.99915 | 4.19576 | 0.01999 | 6.21490 |
| C    | 6  | -0.01642       | 1.99919 | 3.99850 | 0.01873 | 6.01642 |
| H    | 7  | 0.25013        | 0.00000 | 0.74820 | 0.00166 | 0.74987 |
| H    | 8  | 0.24394        | 0.00000 | 0.75436 | 0.00170 | 0.75606 |
| H    | 9  | 0.25249        | 0.00000 | 0.74592 | 0.00159 | 0.74751 |
| H    | 10 | 0.25158        | 0.00000 | 0.74684 | 0.00158 | 0.74842 |
| H    | 11 | 0.24535        | 0.00000 | 0.75337 | 0.00128 | 0.75465 |
| C    | 12 | 0.18864        | 1.99908 | 3.79602 | 0.01626 | 5.81136 |
| H    | 13 | 0.25154        | 0.00000 | 0.74660 | 0.00187 | 0.74846 |
| C    | 14 | -0.52746       | 1.99915 | 4.50927 | 0.01904 | 6.52746 |
| H    | 15 | 0.26577        | 0.00000 | 0.73173 | 0.00251 | 0.73423 |
| C    | 16 | 0.04068        | 1.99912 | 3.94271 | 0.01749 | 5.95932 |
| H    | 17 | 0.26862        | 0.00000 | 0.72897 | 0.00240 | 0.73138 |
| C    | 18 | -0.08443       | 1.99893 | 4.06419 | 0.02131 | 6.08443 |
| H    | 19 | 0.28364        | 0.00000 | 0.71449 | 0.00187 | 0.71636 |
| H    | 20 | 0.33556        | 0.00000 | 0.66283 | 0.00161 | 0.66444 |
| N    | 21 | 0.52211        | 1.99944 | 4.43705 | 0.04140 | 6.47789 |

|   |    |          |         |         |         |         |
|---|----|----------|---------|---------|---------|---------|
| O | 22 | -0.21666 | 1.99976 | 6.19331 | 0.02360 | 8.21666 |
| O | 23 | -0.42167 | 1.99976 | 6.40059 | 0.02131 | 8.42167 |
| H | 24 | 0.57032  | 0.00000 | 0.42670 | 0.00298 | 0.42968 |

---

\* Total \*    2.00000    25.98990    65.71474    0.29537    92.00000

**D7**

Energy E(B3LYP) = -592.838017075 h,  $G^{298}$  = -592.675027 h,  $\mu=13.5$  D

Cartesian coordinates, Å

| N  | atom | x         | y         | z         |
|----|------|-----------|-----------|-----------|
| 1  | C    | 2.058653  | 0.266002  | 0.127514  |
| 2  | C    | 3.045859  | 1.303840  | -0.051422 |
| 3  | C    | 2.474152  | -1.112573 | 0.081621  |
| 4  | C    | 4.358140  | 0.976146  | -0.254556 |
| 5  | C    | 3.790430  | -1.414145 | -0.122518 |
| 6  | C    | 4.728066  | -0.376877 | -0.289769 |
| 7  | H    | 2.728538  | 2.335753  | -0.017437 |
| 8  | H    | 1.756713  | -1.908150 | 0.204339  |
| 9  | H    | 5.104355  | 1.744172  | -0.385951 |
| 10 | H    | 4.117553  | -2.441585 | -0.159353 |
| 11 | H    | 5.765994  | -0.633155 | -0.451637 |
| 12 | C    | 0.770262  | 0.671263  | 0.331498  |
| 13 | H    | 0.567219  | 1.734908  | 0.357694  |
| 14 | C    | -0.399356 | -0.221234 | 0.562384  |
| 15 | H    | -0.250029 | -1.292834 | 0.473088  |
| 16 | C    | -1.684552 | 0.250761  | 0.168740  |
| 17 | H    | -1.849227 | 1.319615  | 0.041745  |
| 18 | C    | -2.810598 | -0.656719 | -0.005755 |
| 19 | H    | -2.927981 | -1.395953 | 0.793516  |
| 20 | H    | -0.654984 | -0.075411 | 1.672350  |
| 21 | H    | -2.664724 | -1.237341 | -0.932359 |
| 22 | N    | -4.124387 | 0.065908  | -0.151182 |
| 23 | O    | -4.251377 | 1.228251  | -0.163069 |
| 24 | O    | -5.106101 | -0.784344 | -0.269045 |
| 25 | H    | -5.949229 | -0.281410 | -0.367233 |

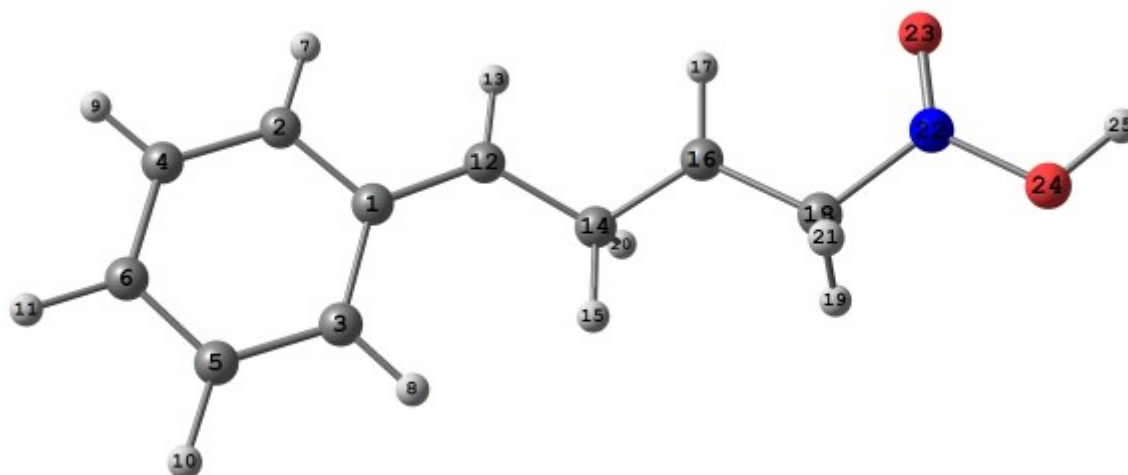



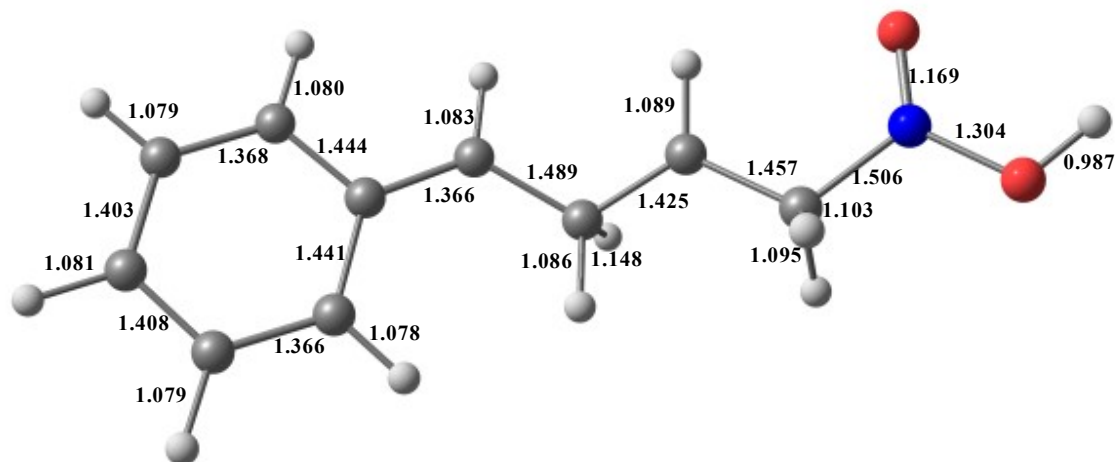

### Summary of Natural Population Analysis:

#### Natural Population

| Atom | No | Natural Charge | Core    | Valence | Rydberg | Total   |
|------|----|----------------|---------|---------|---------|---------|
| C    | 1  | -0.12752       | 1.99898 | 4.10903 | 0.01952 | 6.12752 |
| C    | 2  | -0.02029       | 1.99910 | 4.00299 | 0.01821 | 6.02029 |
| C    | 3  | -0.05155       | 1.99908 | 4.03549 | 0.01697 | 6.05155 |
| C    | 4  | -0.22427       | 1.99914 | 4.20506 | 0.02007 | 6.22427 |
| C    | 5  | -0.21245       | 1.99915 | 4.19317 | 0.02013 | 6.21245 |
| C    | 6  | 0.01886        | 1.99920 | 3.96340 | 0.01854 | 5.98114 |
| H    | 7  | 0.25602        | 0.00000 | 0.74234 | 0.00164 | 0.74398 |
| H    | 8  | 0.24740        | 0.00000 | 0.75080 | 0.00180 | 0.75260 |
| H    | 9  | 0.25949        | 0.00000 | 0.73896 | 0.00155 | 0.74051 |
| H    | 10 | 0.25874        | 0.00000 | 0.73973 | 0.00154 | 0.74126 |
| H    | 11 | 0.25147        | 0.00000 | 0.74728 | 0.00125 | 0.74853 |
| C    | 12 | 0.13780        | 1.99903 | 3.84534 | 0.01783 | 5.86220 |
| H    | 13 | 0.27040        | 0.00000 | 0.72776 | 0.00184 | 0.72960 |
| C    | 14 | -0.56775       | 1.99907 | 4.54549 | 0.02320 | 6.56775 |
| H    | 15 | 0.31386        | 0.00000 | 0.68452 | 0.00162 | 0.68614 |
| C    | 16 | 0.37558        | 1.99920 | 3.60934 | 0.01587 | 5.62442 |
| H    | 17 | 0.30635        | 0.00000 | 0.69090 | 0.00275 | 0.69365 |
| C    | 18 | -0.36794       | 1.99899 | 4.34629 | 0.02266 | 6.36794 |
| H    | 19 | 0.36031        | 0.00000 | 0.63789 | 0.00181 | 0.63969 |
| H    | 20 | 0.44346        | 0.00000 | 0.55450 | 0.00204 | 0.55654 |
| H    | 21 | 0.37702        | 0.00000 | 0.62115 | 0.00182 | 0.62298 |

|           |    |          |          |          |         |          |
|-----------|----|----------|----------|----------|---------|----------|
| N         | 22 | 0.57588  | 1.99957  | 4.38376  | 0.04078 | 6.42412  |
| O         | 23 | -0.11453 | 1.99974  | 6.08599  | 0.02881 | 8.11453  |
| O         | 24 | -0.36400 | 1.99974  | 6.33995  | 0.02431 | 8.36400  |
| H         | 25 | 0.59767  | 0.00000  | 0.39982  | 0.00250 | 0.40233  |
| =====     |    |          |          |          |         |          |
| * Total * |    | 3.00000  | 25.99000 | 65.70094 | 0.30906 | 92.00000 |

1m

Energy E(B3LYP) = -975.197099239 h,  $G^{298} = -975.034368$  h,  $\mu=7.97$  D

Cartesian coordinates, Å

| N  | atom | x         | y         | z         |
|----|------|-----------|-----------|-----------|
| 1  | C    | -2.814707 | 0.224527  | 0.006024  |
| 2  | C    | -3.754270 | 1.266976  | 0.044401  |
| 3  | C    | -3.290992 | -1.097639 | -0.019937 |
| 4  | C    | -5.118626 | 1.003036  | 0.055571  |
| 5  | C    | -4.652428 | -1.359859 | -0.008405 |
| 6  | C    | -5.572965 | -0.311814 | 0.029282  |
| 7  | H    | -3.404914 | 2.290968  | 0.065204  |
| 8  | H    | -2.596876 | -1.925311 | -0.048416 |
| 9  | H    | -5.824566 | 1.821464  | 0.084968  |
| 10 | H    | -5.000449 | -2.383433 | -0.028508 |
| 11 | H    | -6.633567 | -0.521505 | 0.038187  |
| 12 | C    | -1.395128 | 0.564616  | -0.004005 |
| 13 | H    | -1.178557 | 1.627366  | 0.027387  |
| 14 | C    | -0.347957 | -0.283773 | -0.047207 |
| 15 | H    | -0.499573 | -1.355099 | -0.082682 |
| 16 | C    | 1.013782  | 0.187222  | -0.045598 |
| 17 | H    | 1.171485  | 1.259102  | -0.012988 |
| 18 | C    | 2.087481  | -0.614216 | -0.087912 |
| 19 | H    | 2.043376  | -1.693293 | -0.127396 |
| 20 | S    | 3.722216  | 0.041231  | -0.135217 |
| 21 | O    | 4.463012  | -0.669818 | -1.180156 |
| 22 | O    | 3.656720  | 1.501180  | -0.207814 |
| 23 | C    | 4.449299  | -0.407263 | 1.439021  |
| 24 | H    | 5.481332  | -0.064988 | 1.406639  |
| 25 | H    | 3.899003  | 0.090721  | 2.231321  |
| 26 | H    | 4.409075  | -1.487458 | 1.546100  |

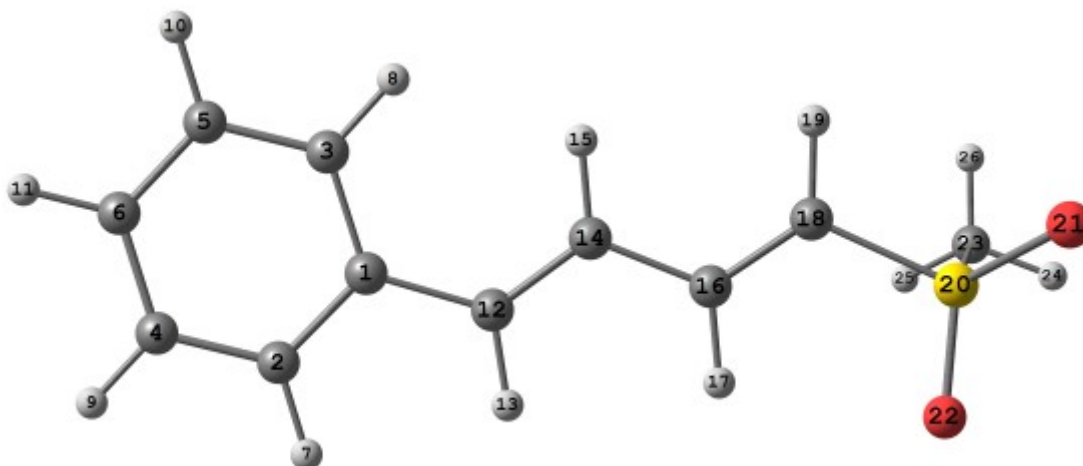

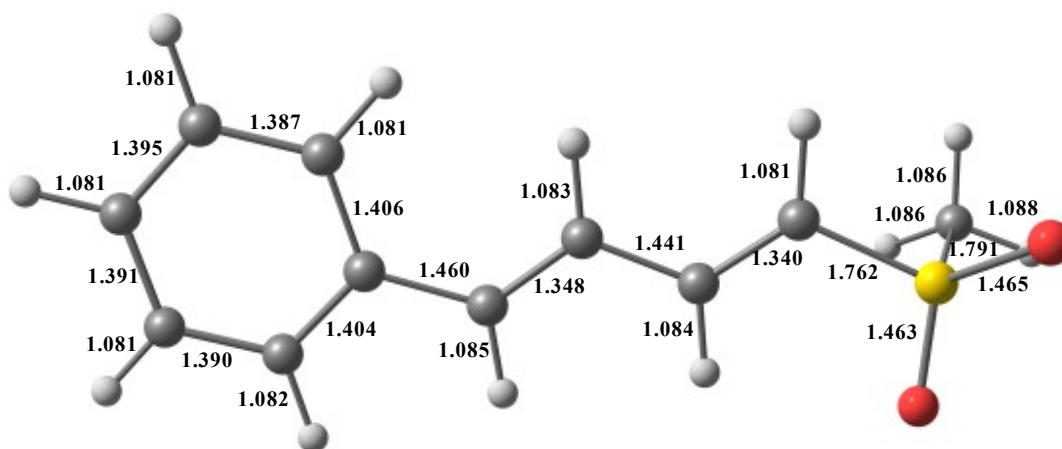

### Summary of Natural Population Analysis:

#### Natural Population

| Atom | No | Natural Charge | Core    | Valence | Rydberg | Total    |
|------|----|----------------|---------|---------|---------|----------|
| C    | 1  | -0.10003       | 1.99901 | 4.08180 | 0.01922 | 6.10003  |
| C    | 2  | -0.17812       | 1.99908 | 4.16010 | 0.01894 | 6.17812  |
| C    | 3  | -0.18112       | 1.99907 | 4.16406 | 0.01800 | 6.18112  |
| C    | 4  | -0.21403       | 1.99915 | 4.19454 | 0.02034 | 6.21403  |
| C    | 5  | -0.21028       | 1.99916 | 4.19086 | 0.02026 | 6.21028  |
| C    | 6  | -0.19962       | 1.99916 | 4.17989 | 0.02057 | 6.19962  |
| H    | 7  | 0.22227        | 0.00000 | 0.77599 | 0.00174 | 0.77773  |
| H    | 8  | 0.22058        | 0.00000 | 0.77765 | 0.00177 | 0.77942  |
| H    | 9  | 0.22369        | 0.00000 | 0.77464 | 0.00168 | 0.77631  |
| H    | 10 | 0.22311        | 0.00000 | 0.77522 | 0.00167 | 0.77689  |
| H    | 11 | 0.22268        | 0.00000 | 0.77577 | 0.00155 | 0.77732  |
| C    | 12 | -0.12219       | 1.99906 | 4.10424 | 0.01889 | 6.12219  |
| H    | 13 | 0.21570        | 0.00000 | 0.78134 | 0.00297 | 0.78430  |
| C    | 14 | -0.23848       | 1.99903 | 4.21996 | 0.01949 | 6.23848  |
| H    | 15 | 0.21812        | 0.00000 | 0.77839 | 0.00349 | 0.78188  |
| C    | 16 | -0.14542       | 1.99905 | 4.12404 | 0.02233 | 6.14542  |
| H    | 17 | 0.23552        | 0.00000 | 0.76222 | 0.00226 | 0.76448  |
| C    | 18 | -0.49256       | 1.99887 | 4.46700 | 0.02669 | 6.49256  |
| H    | 19 | 0.25052        | 0.00000 | 0.74687 | 0.00261 | 0.74948  |
| S    | 20 | 2.11235        | 9.99851 | 3.69004 | 0.19910 | 13.88765 |
| O    | 21 | -1.00038       | 1.99980 | 6.96719 | 0.03338 | 9.00038  |

|   |    |          |         |         |         |         |
|---|----|----------|---------|---------|---------|---------|
| O | 22 | -0.99897 | 1.99980 | 6.96533 | 0.03384 | 8.99897 |
| C | 23 | -0.79328 | 1.99923 | 4.77534 | 0.01871 | 6.79328 |
| H | 24 | 0.24634  | 0.00000 | 0.75162 | 0.00204 | 0.75366 |
| H | 25 | 0.24182  | 0.00000 | 0.75659 | 0.00159 | 0.75818 |
| H | 26 | 0.24179  | 0.00000 | 0.75676 | 0.00145 | 0.75821 |

---

\* Total \*    0.00000    35.98797    73.49745    0.51457    110.00000

**A8**

**Energy E(B3LYP) = -975.600053982 h, G<sup>298</sup> = -975.425764 h,  $\mu=9.21$  D**

**Cartesian coordinates, Å**

| N  | atom | x         | y         | z         |
|----|------|-----------|-----------|-----------|
| 1  | C    | -2.849414 | 0.211574  | 0.015247  |
| 2  | C    | -3.777997 | 1.266500  | 0.028404  |
| 3  | C    | -3.334238 | -1.109037 | -0.002591 |
| 4  | C    | -5.143057 | 1.014479  | 0.023356  |
| 5  | C    | -4.696754 | -1.357481 | -0.007479 |
| 6  | C    | -5.605763 | -0.298057 | 0.005285  |
| 7  | H    | -3.417907 | 2.286528  | 0.042168  |
| 8  | H    | -2.646581 | -1.942054 | -0.012917 |
| 9  | H    | -5.843402 | 1.837688  | 0.033295  |
| 10 | H    | -5.056214 | -2.376793 | -0.021522 |
| 11 | H    | -6.668179 | -0.498104 | 0.001010  |
| 12 | C    | -1.435331 | 0.538788  | 0.018871  |
| 13 | H    | -1.209040 | 1.599543  | 0.032766  |
| 14 | C    | -0.386904 | -0.320356 | 0.004767  |
| 15 | H    | -0.535016 | -1.391435 | -0.010654 |
| 16 | C    | 0.952144  | 0.168793  | 0.004760  |
| 17 | H    | 1.092129  | 1.242968  | 0.018261  |
| 18 | C    | 2.049374  | -0.623298 | -0.016740 |
| 19 | H    | 2.052327  | -1.702958 | -0.028975 |
| 20 | S    | 3.608298  | 0.102467  | -0.030479 |
| 21 | O    | 4.426082  | -0.598891 | -1.207014 |
| 22 | O    | 3.571810  | 1.542543  | -0.111582 |
| 23 | C    | 4.595742  | -0.491575 | 1.318169  |
| 24 | H    | 5.605303  | -0.125058 | 1.150211  |
| 25 | H    | 4.162471  | -0.069174 | 2.220036  |
| 26 | H    | 4.559047  | -1.576650 | 1.325609  |
| 27 | H    | 3.982346  | -0.475183 | -2.065153 |

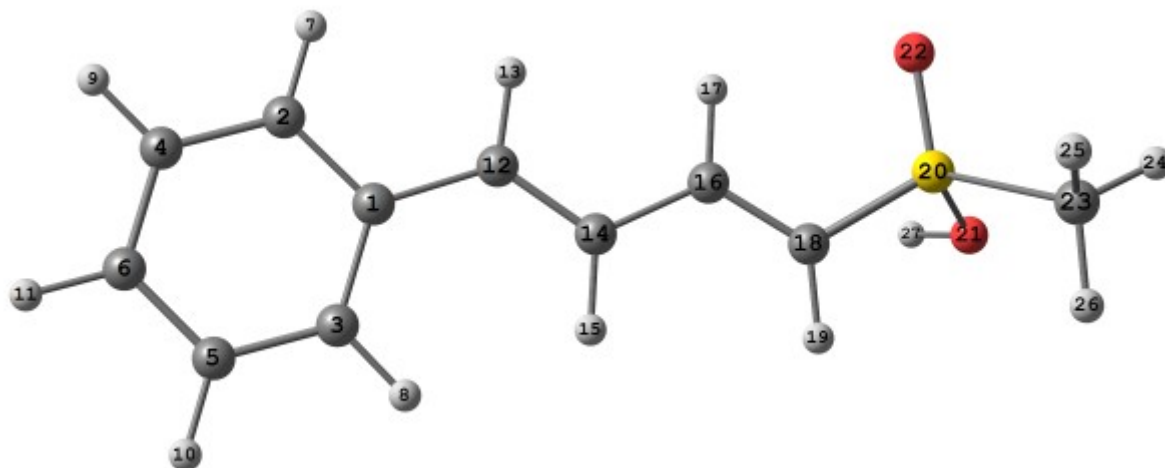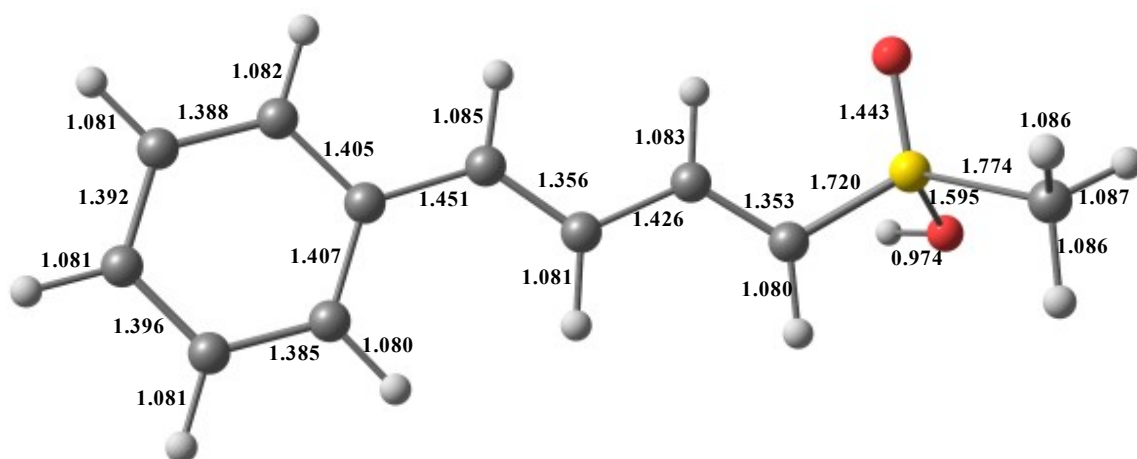

**Summary of Natural Population Analysis:**

Natural Population

| Atom No | Charge   | Core    | Valence | Rydberg | Total   |
|---------|----------|---------|---------|---------|---------|
| C 1     | -0.11521 | 1.99901 | 4.09655 | 0.01966 | 6.11521 |
| C 2     | -0.16084 | 1.99908 | 4.14281 | 0.01895 | 6.16084 |
| C 3     | -0.16598 | 1.99907 | 4.14900 | 0.01791 | 6.16598 |
| C 4     | -0.21421 | 1.99915 | 4.19476 | 0.02029 | 6.21421 |
| C 5     | -0.20968 | 1.99916 | 4.19034 | 0.02018 | 6.20968 |
| C 6     | -0.17925 | 1.99916 | 4.15984 | 0.02024 | 6.17925 |

|   |    |          |         |         |         |          |
|---|----|----------|---------|---------|---------|----------|
| H | 7  | 0.22606  | 0.00000 | 0.77214 | 0.00180 | 0.77394  |
| H | 8  | 0.22388  | 0.00000 | 0.77435 | 0.00177 | 0.77612  |
| H | 9  | 0.22711  | 0.00000 | 0.77123 | 0.00166 | 0.77289  |
| H | 10 | 0.22648  | 0.00000 | 0.77186 | 0.00166 | 0.77352  |
| H | 11 | 0.22549  | 0.00000 | 0.77301 | 0.00151 | 0.77451  |
| C | 12 | -0.06608 | 1.99908 | 4.04837 | 0.01863 | 6.06608  |
| H | 13 | 0.22411  | 0.00000 | 0.77390 | 0.00199 | 0.77589  |
| C | 14 | -0.26005 | 1.99904 | 4.24066 | 0.02035 | 6.26005  |
| H | 15 | 0.22860  | 0.00000 | 0.76792 | 0.00349 | 0.77140  |
| C | 16 | -0.08557 | 1.99908 | 4.06435 | 0.02213 | 6.08557  |
| H | 17 | 0.24657  | 0.00000 | 0.75116 | 0.00226 | 0.75343  |
| C | 18 | -0.54357 | 1.99891 | 4.51950 | 0.02516 | 6.54357  |
| H | 19 | 0.28034  | 0.00000 | 0.71721 | 0.00244 | 0.71966  |
| S | 20 | 2.06458  | 9.99833 | 3.76600 | 0.17110 | 13.93542 |
| O | 21 | -0.87573 | 1.99979 | 6.84826 | 0.02768 | 8.87573  |
| O | 22 | -0.90094 | 1.99978 | 6.86365 | 0.03751 | 8.90094  |
| C | 23 | -0.77514 | 1.99922 | 4.75606 | 0.01987 | 6.77514  |
| H | 24 | 0.27033  | 0.00000 | 0.72787 | 0.00180 | 0.72967  |
| H | 25 | 0.26615  | 0.00000 | 0.73248 | 0.00137 | 0.73385  |
| H | 26 | 0.26743  | 0.00000 | 0.73120 | 0.00137 | 0.73257  |
| H | 27 | 0.57512  | 0.00000 | 0.42202 | 0.00286 | 0.42488  |

---

\* Total \* 1.00000 35.98786 73.52650 0.48564 110.00000

## C8

Energy E(B3LYP) = -975.995121247 h,  $G^{298}$  = -975.80785 h,  $\mu$ =4.64 D

### Cartesian coordinates, Å

| N  | atom | x         | y         | z         |
|----|------|-----------|-----------|-----------|
| 1  | C    | -2.733316 | 0.288414  | -0.074609 |
| 2  | C    | -3.742153 | 1.249970  | 0.228351  |
| 3  | C    | -3.101368 | -1.082418 | -0.216116 |
| 4  | C    | -5.052021 | 0.858791  | 0.379822  |
| 5  | C    | -4.413348 | -1.457825 | -0.061791 |
| 6  | C    | -5.385932 | -0.491693 | 0.234586  |
| 7  | H    | -3.461974 | 2.288214  | 0.333730  |
| 8  | H    | -2.355035 | -1.826970 | -0.444067 |
| 9  | H    | -5.817948 | 1.584322  | 0.607740  |
| 10 | H    | -4.699714 | -2.493177 | -0.168235 |
| 11 | H    | -6.415779 | -0.798710 | 0.352554  |
| 12 | C    | -1.422334 | 0.744204  | -0.225343 |
| 13 | H    | -1.259327 | 1.807732  | -0.096460 |
| 14 | C    | -0.275995 | -0.035078 | -0.531773 |
| 15 | H    | -0.361208 | -1.103195 | -0.666794 |
| 16 | C    | 0.922856  | 0.570464  | -0.675644 |
| 17 | H    | 1.013843  | 1.641557  | -0.547641 |
| 18 | C    | 2.152518  | -0.172143 | -1.067531 |
| 19 | H    | 2.012575  | -1.243770 | -1.181562 |
| 20 | S    | 3.498497  | 0.050111  | 0.140607  |
| 21 | O    | 4.689475  | -0.811085 | -0.427173 |
| 22 | O    | 3.787503  | 1.439239  | 0.367011  |
| 23 | C    | 3.147907  | -0.877163 | 1.607568  |

|    |   |          |           |           |
|----|---|----------|-----------|-----------|
| 24 | H | 4.019022 | -0.747665 | 2.245653  |
| 25 | H | 2.263635 | -0.434070 | 2.057750  |
| 26 | H | 2.992645 | -1.917788 | 1.339492  |
| 27 | H | 5.118529 | -0.403630 | -1.202585 |
| 28 | H | 2.578067 | 0.246996  | -1.983119 |

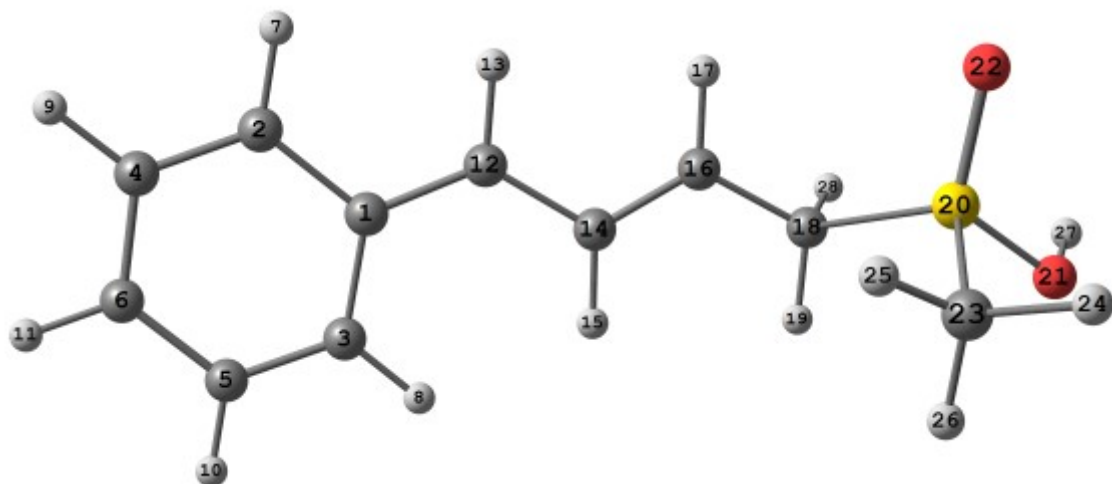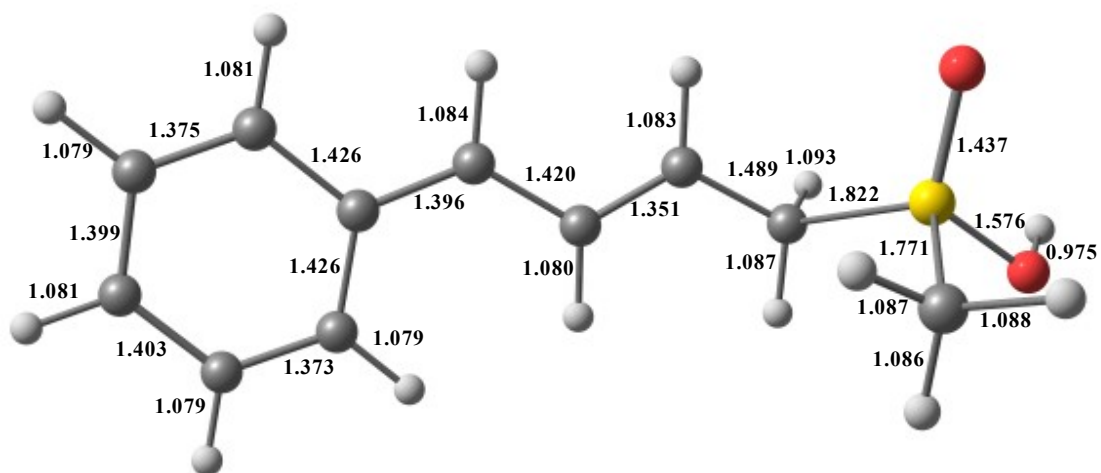



**Summary of Natural Population Analysis:**

Natural Population

| Natural |    | -----    |         |         |         |          |
|---------|----|----------|---------|---------|---------|----------|
| Atom    | No | Charge   | Core    | Valence | Rydberg | Total    |
| C       | 1  | -0.13409 | 1.99901 | 4.11548 | 0.01959 | 6.13409  |
| C       | 2  | -0.06775 | 1.99910 | 4.05039 | 0.01826 | 6.06775  |
| C       | 3  | -0.08524 | 1.99908 | 4.06893 | 0.01723 | 6.08524  |
| C       | 4  | -0.22018 | 1.99914 | 4.20106 | 0.01998 | 6.22018  |
| C       | 5  | -0.21243 | 1.99916 | 4.19337 | 0.01990 | 6.21243  |
| C       | 6  | -0.03915 | 1.99919 | 4.02105 | 0.01892 | 6.03915  |
| H       | 7  | 0.24550  | 0.00000 | 0.75286 | 0.00164 | 0.75450  |
| H       | 8  | 0.24146  | 0.00000 | 0.75687 | 0.00168 | 0.75854  |
| H       | 9  | 0.24663  | 0.00000 | 0.75178 | 0.00159 | 0.75337  |
| H       | 10 | 0.24585  | 0.00000 | 0.75257 | 0.00158 | 0.75415  |
| H       | 11 | 0.23964  | 0.00000 | 0.75904 | 0.00132 | 0.76036  |
| C       | 12 | 0.08630  | 1.99910 | 3.89591 | 0.01869 | 5.91370  |
| H       | 13 | 0.25047  | 0.00000 | 0.74765 | 0.00188 | 0.74953  |
| C       | 14 | -0.24301 | 1.99901 | 4.22356 | 0.02044 | 6.24301  |
| H       | 15 | 0.25291  | 0.00000 | 0.74387 | 0.00322 | 0.74709  |
| C       | 16 | -0.03488 | 1.99911 | 4.01691 | 0.01886 | 6.03488  |
| H       | 17 | 0.25600  | 0.00000 | 0.74184 | 0.00216 | 0.74400  |
| C       | 18 | -0.61623 | 1.99910 | 4.58881 | 0.02833 | 6.61623  |
| H       | 19 | 0.28467  | 0.00000 | 0.71328 | 0.00205 | 0.71533  |
| S       | 20 | 2.07193  | 9.99855 | 3.76735 | 0.16216 | 13.92807 |
| O       | 21 | -0.84981 | 1.99977 | 6.82116 | 0.02887 | 8.84981  |
| O       | 22 | -0.86719 | 1.99978 | 6.82718 | 0.04023 | 8.86719  |
| C       | 23 | -0.78690 | 1.99922 | 4.76692 | 0.02076 | 6.78690  |
| H       | 24 | 0.28531  | 0.00000 | 0.71219 | 0.00250 | 0.71469  |
| H       | 25 | 0.27558  | 0.00000 | 0.72305 | 0.00137 | 0.72442  |
| H       | 26 | 0.27955  | 0.00000 | 0.71903 | 0.00141 | 0.72045  |
| H       | 27 | 0.58793  | 0.00000 | 0.40929 | 0.00278 | 0.41207  |
| H       | 28 | 0.30712  | 0.00000 | 0.69019 | 0.00268 | 0.69288  |

=====  
 \* Total \*    2.00000    35.98832    73.53161    0.48007    110.00000  
 =====

**B8**

Energy E(B3LYP) = -975.97963567 h, G<sup>298</sup> = -975.794459 h, μ=3.07 D

**Cartesian coordinates, Å**

| N  | atom | x         | y         | z         |
|----|------|-----------|-----------|-----------|
| 1  | C    | -2.752120 | 0.228991  | -0.202159 |
| 2  | C    | -3.660084 | 1.302884  | 0.069395  |
| 3  | C    | -3.214234 | -1.120365 | -0.086124 |
| 4  | C    | -4.958224 | 1.038170  | 0.430556  |
| 5  | C    | -4.514696 | -1.365586 | 0.271356  |
| 6  | C    | -5.382090 | -0.291648 | 0.529651  |
| 7  | H    | -3.306924 | 2.320110  | -0.018117 |
| 8  | H    | -2.544907 | -1.943873 | -0.279322 |
| 9  | H    | -5.647137 | 1.843039  | 0.635840  |
| 10 | H    | -4.875226 | -2.378976 | 0.359862  |
| 11 | H    | -6.403957 | -0.499452 | 0.815304  |

|    |   |           |           |           |
|----|---|-----------|-----------|-----------|
| 12 | C | -1.467978 | 0.560761  | -0.583974 |
| 13 | H | -1.237607 | 1.619460  | -0.637788 |
| 14 | C | -0.382552 | -0.361030 | -0.982329 |
| 15 | H | -0.524126 | -1.375622 | -0.623111 |
| 16 | C | 0.989980  | 0.161523  | -0.677626 |
| 17 | H | 1.215872  | 1.179581  | -0.970979 |
| 18 | C | 1.926944  | -0.583668 | -0.104958 |
| 19 | H | 1.825291  | -1.605324 | 0.230745  |
| 20 | S | 3.526524  | 0.099571  | 0.120460  |
| 21 | O | 4.525354  | -0.977285 | -0.471078 |
| 22 | O | 3.652883  | 1.420754  | -0.434751 |
| 23 | C | 3.992570  | -0.018918 | 1.824169  |
| 24 | H | 5.033491  | 0.291746  | 1.873944  |
| 25 | H | 3.346061  | 0.664930  | 2.366803  |
| 26 | H | 3.863183  | -1.046323 | 2.151142  |
| 27 | H | 4.397855  | -1.106213 | -1.428978 |
| 28 | H | -0.457245 | -0.410648 | -2.083807 |

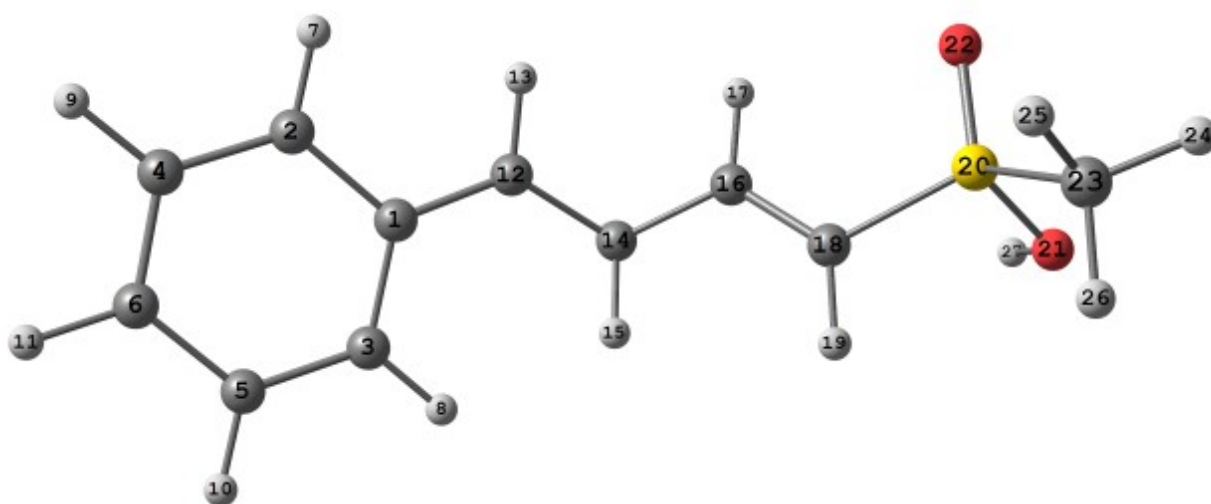

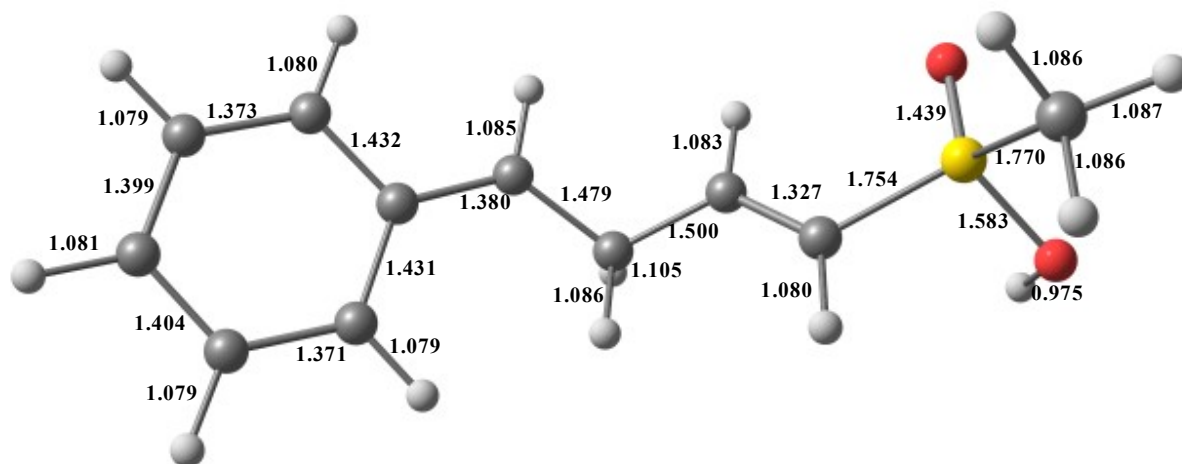

### Summary of Natural Population Analysis:

#### Natural Population

| Atom | No | Natural Charge | Core    | Valence | Rydberg | Total    |
|------|----|----------------|---------|---------|---------|----------|
| C    | 1  | -0.16873       | 1.99898 | 4.15011 | 0.01963 | 6.16873  |
| C    | 2  | -0.04031       | 1.99910 | 4.02282 | 0.01839 | 6.04031  |
| C    | 3  | -0.06334       | 1.99908 | 4.04705 | 0.01721 | 6.06334  |
| C    | 4  | -0.22652       | 1.99914 | 4.20730 | 0.02007 | 6.22652  |
| C    | 5  | -0.21543       | 1.99915 | 4.19630 | 0.01998 | 6.21543  |
| C    | 6  | -0.02981       | 1.99919 | 4.01185 | 0.01877 | 6.02981  |
| H    | 7  | 0.24894        | 0.00000 | 0.74939 | 0.00167 | 0.75106  |
| H    | 8  | 0.24300        | 0.00000 | 0.75528 | 0.00172 | 0.75700  |
| H    | 9  | 0.25140        | 0.00000 | 0.74701 | 0.00159 | 0.74860  |
| H    | 10 | 0.25053        | 0.00000 | 0.74789 | 0.00158 | 0.74947  |
| H    | 11 | 0.24536        | 0.00000 | 0.75335 | 0.00129 | 0.75464  |
| C    | 12 | 0.20515        | 1.99909 | 3.77980 | 0.01597 | 5.79485  |
| H    | 13 | 0.24718        | 0.00000 | 0.75094 | 0.00189 | 0.75282  |
| C    | 14 | -0.51820       | 1.99915 | 4.49878 | 0.02027 | 6.51820  |
| H    | 15 | 0.25890        | 0.00000 | 0.73835 | 0.00276 | 0.74110  |
| C    | 16 | -0.04169       | 1.99903 | 4.02186 | 0.02080 | 6.04169  |
| H    | 17 | 0.25958        | 0.00000 | 0.73827 | 0.00214 | 0.74042  |
| C    | 18 | -0.47216       | 1.99880 | 4.44928 | 0.02408 | 6.47216  |
| H    | 19 | 0.28851        | 0.00000 | 0.70904 | 0.00245 | 0.71149  |
| S    | 20 | 2.06906        | 9.99841 | 3.76405 | 0.16849 | 13.93094 |
| O    | 21 | -0.86408       | 1.99978 | 6.83617 | 0.02813 | 8.86408  |

|   |    |          |         |         |         |         |
|---|----|----------|---------|---------|---------|---------|
| O | 22 | -0.88003 | 1.99978 | 6.84156 | 0.03870 | 8.88003 |
| C | 23 | -0.77551 | 1.99922 | 4.75626 | 0.02003 | 6.77551 |
| H | 24 | 0.27746  | 0.00000 | 0.72024 | 0.00229 | 0.72254 |
| H | 25 | 0.27276  | 0.00000 | 0.72591 | 0.00133 | 0.72724 |
| H | 26 | 0.27404  | 0.00000 | 0.72462 | 0.00134 | 0.72596 |
| H | 27 | 0.58357  | 0.00000 | 0.41367 | 0.00276 | 0.41643 |
| H | 28 | 0.32038  | 0.00000 | 0.67792 | 0.00170 | 0.67962 |

---

\* Total \*    2.00000    35.98791    73.53506    0.47704    110.00000

### D8

Energy E(B3LYP) = -976.302976402 h,  $G^{298}$  = -976.109017 h,  $\mu=6.09$  D

### Cartesian coordinates, Å

| N  | atom | x         | y         | z         |
|----|------|-----------|-----------|-----------|
| 1  | C    | -2.810687 | 0.232763  | -0.167173 |
| 2  | C    | -3.741206 | 1.309860  | 0.061707  |
| 3  | C    | -3.275250 | -1.126056 | -0.072099 |
| 4  | C    | -5.049426 | 1.038519  | 0.358397  |
| 5  | C    | -4.586153 | -1.372060 | 0.225409  |
| 6  | C    | -5.468971 | -0.296919 | 0.439723  |
| 7  | H    | -3.387305 | 2.327746  | -0.009730 |
| 8  | H    | -2.599538 | -1.950864 | -0.234147 |
| 9  | H    | -5.753726 | 1.838135  | 0.527530  |
| 10 | H    | -4.949915 | -2.385134 | 0.298853  |
| 11 | H    | -6.502628 | -0.508909 | 0.675662  |
| 12 | C    | -1.525111 | 0.584305  | -0.474136 |
| 13 | H    | -1.289995 | 1.640369  | -0.529103 |
| 14 | C    | -0.405552 | -0.350136 | -0.783579 |
| 15 | H    | -0.543117 | -1.396405 | -0.525181 |
| 16 | C    | 0.927493  | 0.142397  | -0.579699 |
| 17 | H    | 1.086780  | 1.220331  | -0.548440 |
| 18 | C    | 2.101771  | -0.714513 | -0.545830 |
| 19 | H    | 1.961890  | -1.688141 | -0.076562 |
| 20 | S    | 3.594792  | 0.127338  | 0.130489  |
| 21 | O    | 4.793612  | -0.684572 | -0.453162 |
| 22 | O    | 3.545182  | 1.526377  | -0.175666 |
| 23 | C    | 3.736651  | -0.294293 | 1.840474  |
| 24 | H    | 4.665891  | 0.167536  | 2.169867  |
| 25 | H    | 2.876475  | 0.139782  | 2.344169  |
| 26 | H    | 3.768920  | -1.376718 | 1.928016  |
| 27 | H    | 5.023749  | -0.449564 | -1.373707 |
| 28 | H    | -0.356428 | -0.364919 | -1.917006 |
| 29 | H    | 2.350583  | -0.908286 | -1.606590 |

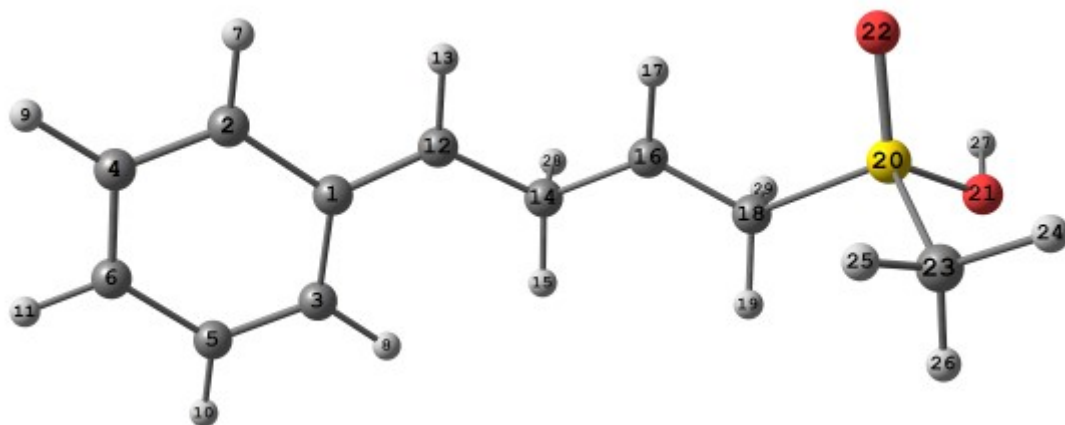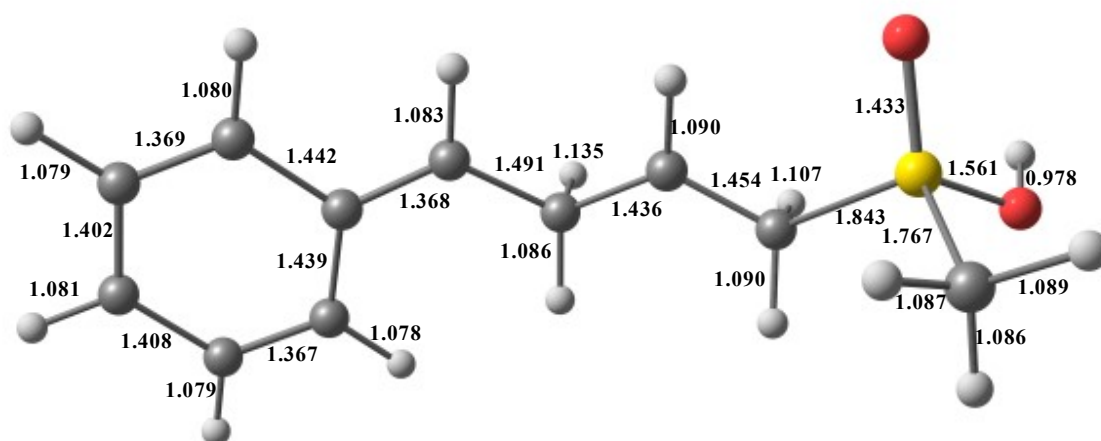

### Summary of Natural Population Analysis:

#### Natural Population

| Atom No | Charge   | Core    | Valence | Rydberg | Total   |
|---------|----------|---------|---------|---------|---------|
| C 1     | -0.12966 | 1.99898 | 4.11117 | 0.01950 | 6.12966 |
| C 2     | -0.02018 | 1.99910 | 4.00286 | 0.01823 | 6.02018 |
| C 3     | -0.05316 | 1.99908 | 4.03710 | 0.01698 | 6.05316 |
| C 4     | -0.22448 | 1.99914 | 4.20529 | 0.02006 | 6.22448 |
| C 5     | -0.21155 | 1.99915 | 4.19229 | 0.02011 | 6.21155 |
| C 6     | 0.01742  | 1.99920 | 3.96482 | 0.01856 | 5.98258 |
| H 7     | 0.25405  | 0.00000 | 0.74430 | 0.00165 | 0.74595 |
| H 8     | 0.24628  | 0.00000 | 0.75190 | 0.00182 | 0.75372 |

|   |    |          |         |         |         |          |
|---|----|----------|---------|---------|---------|----------|
| H | 9  | 0.25763  | 0.00000 | 0.74081 | 0.00156 | 0.74237  |
| H | 10 | 0.25672  | 0.00000 | 0.74173 | 0.00155 | 0.74328  |
| H | 11 | 0.24929  | 0.00000 | 0.74946 | 0.00125 | 0.75071  |
| C | 12 | 0.13811  | 1.99904 | 3.84543 | 0.01742 | 5.86189  |
| H | 13 | 0.26877  | 0.00000 | 0.72933 | 0.00190 | 0.73123  |
| C | 14 | -0.59410 | 1.99906 | 4.57166 | 0.02338 | 6.59410  |
| H | 15 | 0.31692  | 0.00000 | 0.68130 | 0.00178 | 0.68308  |
| C | 16 | 0.39511  | 1.99922 | 3.58925 | 0.01642 | 5.60489  |
| H | 17 | 0.29231  | 0.00000 | 0.70510 | 0.00259 | 0.70769  |
| C | 18 | -0.71471 | 1.99896 | 4.68659 | 0.02916 | 6.71471  |
| H | 19 | 0.33571  | 0.00000 | 0.66226 | 0.00203 | 0.66429  |
| S | 20 | 2.08737  | 9.99858 | 3.74720 | 0.16685 | 13.91263 |
| O | 21 | -0.84636 | 1.99977 | 6.81655 | 0.03004 | 8.84636  |
| O | 22 | -0.83734 | 1.99978 | 6.79602 | 0.04155 | 8.83734  |
| C | 23 | -0.77784 | 1.99922 | 4.75738 | 0.02124 | 6.77784  |
| H | 24 | 0.29476  | 0.00000 | 0.70288 | 0.00236 | 0.70524  |
| H | 25 | 0.28184  | 0.00000 | 0.71649 | 0.00167 | 0.71816  |
| H | 26 | 0.28716  | 0.00000 | 0.71147 | 0.00137 | 0.71284  |
| H | 27 | 0.60368  | 0.00000 | 0.39362 | 0.00271 | 0.39632  |
| H | 28 | 0.43343  | 0.00000 | 0.56468 | 0.00189 | 0.56657  |
| H | 29 | 0.39283  | 0.00000 | 0.60491 | 0.00226 | 0.60717  |

---

\* Total \*    3.00000    35.98828    73.52384    0.48789    110.00000

$\pi$ -complex cis-3a

Energy E = -1192.96156761 h, G<sup>298</sup> = -1192.575753 h,  $\mu$  = 4.7 D

Cartesian coordinates, Å

|    |   |           |           |           |
|----|---|-----------|-----------|-----------|
| 1  | C | -5.775216 | -2.756283 | -0.603500 |
| 2  | C | -5.400384 | -2.714883 | 0.733558  |
| 3  | C | -4.132843 | -2.274568 | 1.092101  |
| 4  | C | -3.233284 | -1.872889 | 0.112983  |
| 5  | C | -3.611104 | -1.913470 | -1.230613 |
| 6  | C | -4.877238 | -2.352698 | -1.586505 |
| 7  | C | -1.879048 | -1.401408 | 0.523548  |
| 8  | C | -1.641755 | 0.087539  | 0.033062  |
| 9  | C | -2.329209 | 1.220696  | 0.395016  |
| 10 | C | -1.832215 | 2.506021  | 0.102467  |
| 11 | C | -0.576328 | 2.655023  | -0.551298 |
| 12 | C | 0.094171  | 1.529110  | -0.968572 |
| 13 | C | -0.435816 | 0.155716  | -0.784790 |
| 14 | O | -2.423694 | 3.628668  | 0.447607  |
| 15 | C | -3.695300 | 3.583311  | 1.110778  |
| 16 | O | -0.180456 | 3.935058  | -0.695398 |
| 17 | C | 1.076621  | 4.142891  | -1.330327 |
| 18 | C | -0.442122 | -1.886631 | 0.159649  |
| 19 | C | 0.450360  | -0.808811 | 0.507077  |
| 20 | C | 1.812198  | -0.955938 | 0.071861  |
| 21 | C | 2.902882  | -0.638323 | 0.803528  |
| 22 | O | 2.883472  | -0.069900 | 2.032992  |
| 23 | C | 4.281124  | -0.861554 | 0.327508  |
| 24 | C | 5.317775  | -0.081083 | 0.842292  |
| 25 | C | 6.616965  | -0.257667 | 0.389172  |
| 26 | C | 6.897269  | -1.217817 | -0.575007 |
| 27 | C | 5.870568  | -2.008086 | -1.080912 |
| 28 | C | 4.571671  | -1.835678 | -0.630835 |
| 29 | H | -3.220148 | 1.117671  | 0.995151  |
| 30 | H | 1.016398  | 1.619348  | -1.519602 |
| 31 | H | 0.049176  | -0.344064 | -1.597997 |
| 32 | H | -1.815156 | -1.324120 | 1.614293  |
| 33 | H | -0.145936 | -2.743296 | 0.823912  |
| 34 | H | -0.277637 | -2.335548 | -0.787966 |
| 35 | H | 0.324632  | -0.539194 | 1.547977  |
| 36 | H | 1.970833  | -1.338319 | -0.926640 |
| 37 | H | 1.997081  | 0.195070  | 2.293871  |
| 38 | H | 5.101368  | 0.666118  | 1.591408  |
| 39 | H | 3.788140  | -2.476456 | -1.010295 |
| 40 | H | 7.410763  | 0.356206  | 0.790829  |
| 41 | H | 6.083687  | -2.767678 | -1.819663 |
| 42 | H | 7.910251  | -1.356140 | -0.925734 |
| 43 | H | -3.843558 | -2.241541 | 2.134344  |
| 44 | H | -2.915456 | -1.598219 | -1.997921 |
| 45 | H | -6.093442 | -3.025447 | 1.502567  |
| 46 | H | -5.163556 | -2.379753 | -2.628733 |
| 47 | H | -6.762115 | -3.100110 | -0.879645 |

|    |   |           |          |           |
|----|---|-----------|----------|-----------|
| 48 | H | -4.415408 | 3.053578 | 0.490713  |
| 49 | H | -3.588555 | 3.102726 | 2.080822  |
| 50 | H | -3.988577 | 4.618291 | 1.233159  |
| 51 | H | 1.875153  | 3.657490 | -0.767934 |
| 52 | H | 1.056675  | 3.762014 | -2.352092 |
| 53 | H | 1.232362  | 5.215640 | -1.339879 |

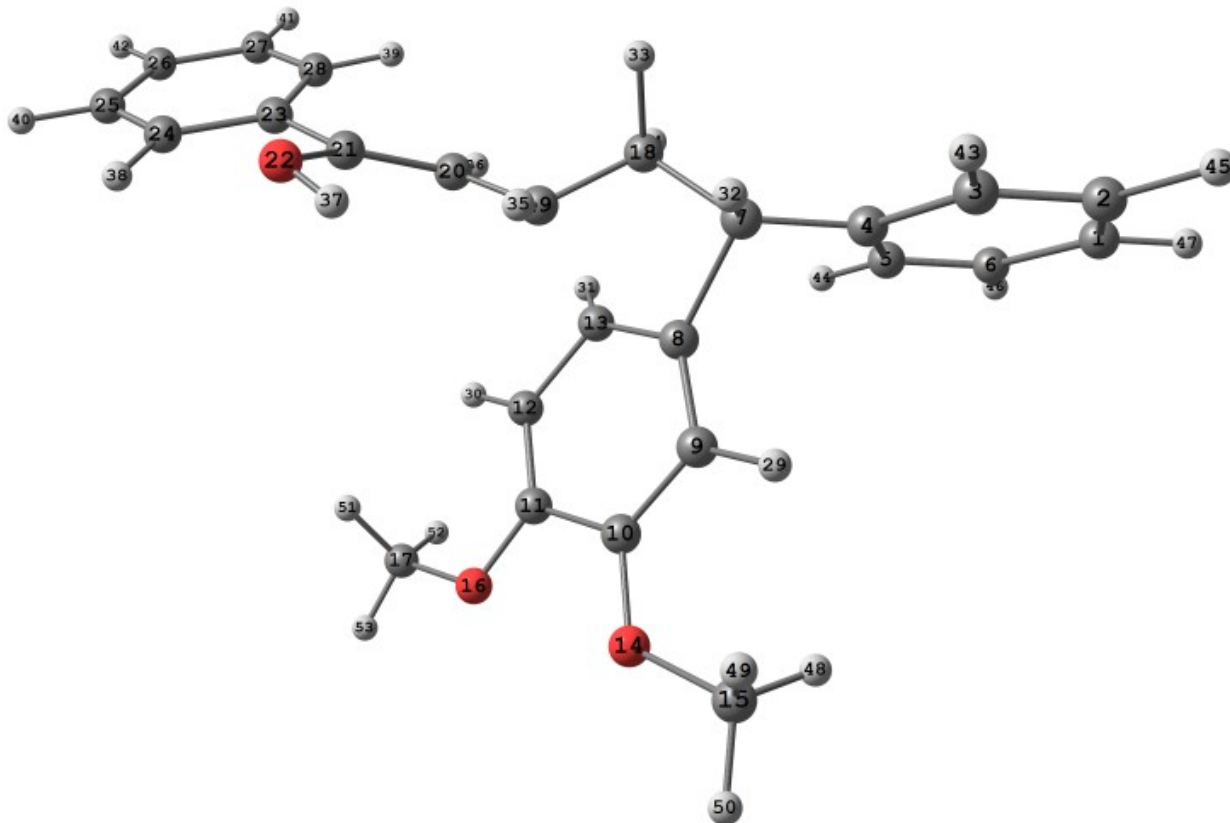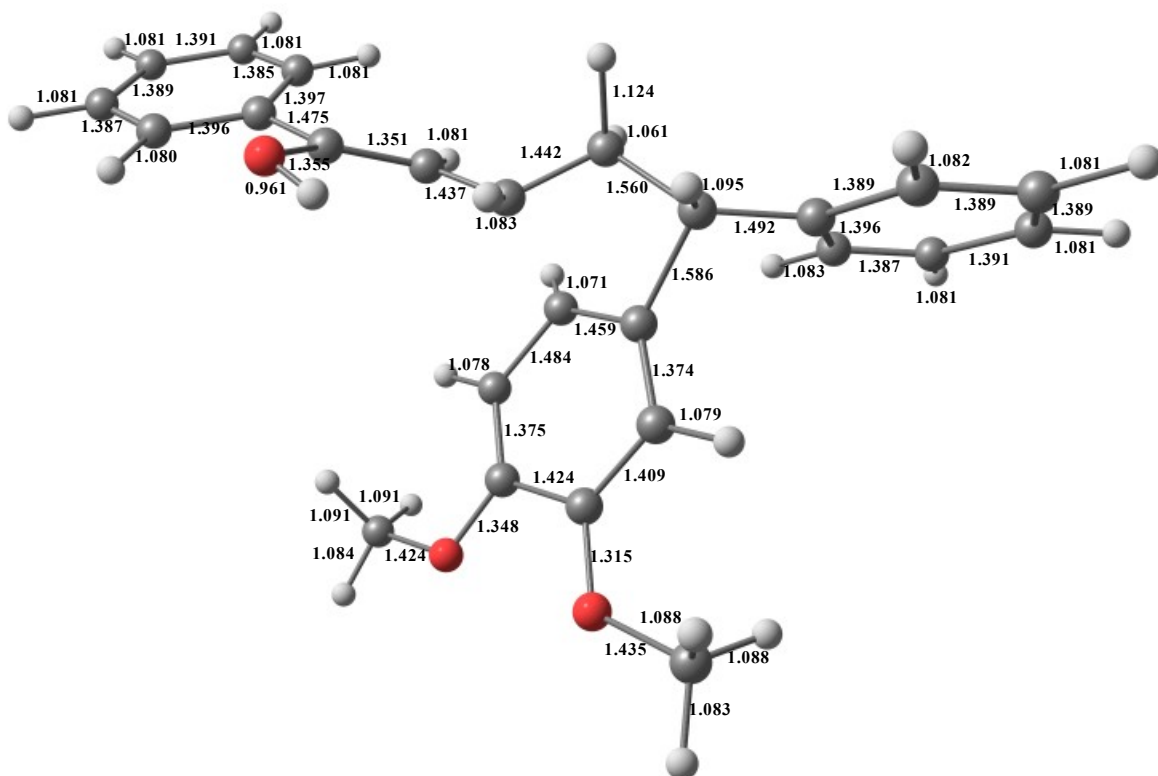



**$\sigma$ -complex cis-3a**Energy E = -1193.03112733 h,  $G^{298}$  = -1192.642382 h,  $\mu$ =10.5 D**Cartesian coordinates, Å**

| N  | atom | x         | y         | z         |
|----|------|-----------|-----------|-----------|
| 1  | C    | 6.897434  | -1.220144 | -0.854482 |
| 2  | C    | 6.699438  | -0.137076 | -0.008585 |
| 3  | C    | 5.441161  | 0.114892  | 0.521821  |
| 4  | C    | 4.361511  | -0.712082 | 0.207081  |
| 5  | C    | 4.572422  | -1.808434 | -0.631586 |
| 6  | C    | 5.829411  | -2.056637 | -1.161566 |
| 7  | C    | 3.021770  | -0.410561 | 0.762602  |
| 8  | O    | 3.106752  | 0.319850  | 1.909465  |
| 9  | C    | 1.875068  | -0.798541 | 0.192151  |
| 10 | C    | 0.501411  | -0.550830 | 0.716534  |
| 11 | C    | -0.427146 | -1.780393 | 0.698137  |
| 12 | C    | -1.848211 | -1.192822 | 0.839134  |
| 13 | C    | -1.714704 | 0.193299  | 0.266781  |
| 14 | C    | -2.655784 | 1.168069  | 0.247177  |
| 15 | C    | -2.243889 | 2.482488  | -0.071311 |
| 16 | C    | -0.847510 | 2.813472  | -0.329511 |
| 17 | C    | 0.075183  | 1.830088  | -0.347650 |
| 18 | C    | -0.332045 | 0.428878  | -0.164193 |
| 19 | H    | -3.674453 | 0.968438  | 0.544053  |
| 20 | H    | 1.113150  | 2.029941  | -0.574007 |
| 21 | H    | -0.291123 | -0.028918 | -1.174400 |
| 22 | H    | -2.047178 | -1.036843 | 1.904638  |
| 23 | H    | -0.198944 | -2.490560 | 1.487793  |
| 24 | H    | -0.324970 | -2.290924 | -0.261637 |
| 25 | H    | 0.515696  | -0.151878 | 1.733365  |
| 26 | H    | 1.937699  | -1.327087 | -0.749505 |
| 27 | H    | 2.237121  | 0.613393  | 2.195254  |
| 28 | H    | 5.289407  | 0.958415  | 1.178937  |
| 29 | H    | 3.758429  | -2.483830 | -0.854565 |
| 30 | H    | 7.525377  | 0.514769  | 0.240040  |
| 31 | H    | 5.978441  | -2.911227 | -1.806710 |
| 32 | H    | 7.877545  | -1.417124 | -1.266082 |
| 33 | C    | -2.978058 | -2.013307 | 0.263144  |
| 34 | C    | -3.956805 | -2.549850 | 1.093513  |
| 35 | C    | -3.049021 | -2.248786 | -1.109790 |
| 36 | C    | -4.988765 | -3.316542 | 0.563710  |
| 37 | C    | -4.078872 | -3.011899 | -1.640301 |
| 38 | C    | -5.051600 | -3.549062 | -0.803335 |
| 39 | H    | -3.911153 | -2.368787 | 2.159604  |
| 40 | H    | -2.297341 | -1.834648 | -1.771455 |
| 41 | H    | -5.741632 | -3.729091 | 1.220841  |
| 42 | H    | -4.123506 | -3.186981 | -2.706142 |
| 43 | H    | -5.853562 | -4.144286 | -1.216970 |
| 44 | O    | -3.044098 | 3.493325  | -0.111173 |
| 45 | C    | -4.456786 | 3.315434  | 0.119136  |
| 46 | H    | -4.858100 | 2.607917  | -0.601311 |

|    |   |           |          |           |
|----|---|-----------|----------|-----------|
| 47 | H | -4.617177 | 2.973681 | 1.138228  |
| 48 | H | -4.890566 | 4.296278 | -0.025571 |
| 49 | O | -0.639813 | 4.121644 | -0.531219 |
| 50 | C | 0.706181  | 4.519916 | -0.773331 |
| 51 | H | 1.339277  | 4.252117 | 0.072902  |
| 52 | H | 1.083533  | 4.054401 | -1.683991 |
| 53 | H | 0.680554  | 5.596874 | -0.891576 |

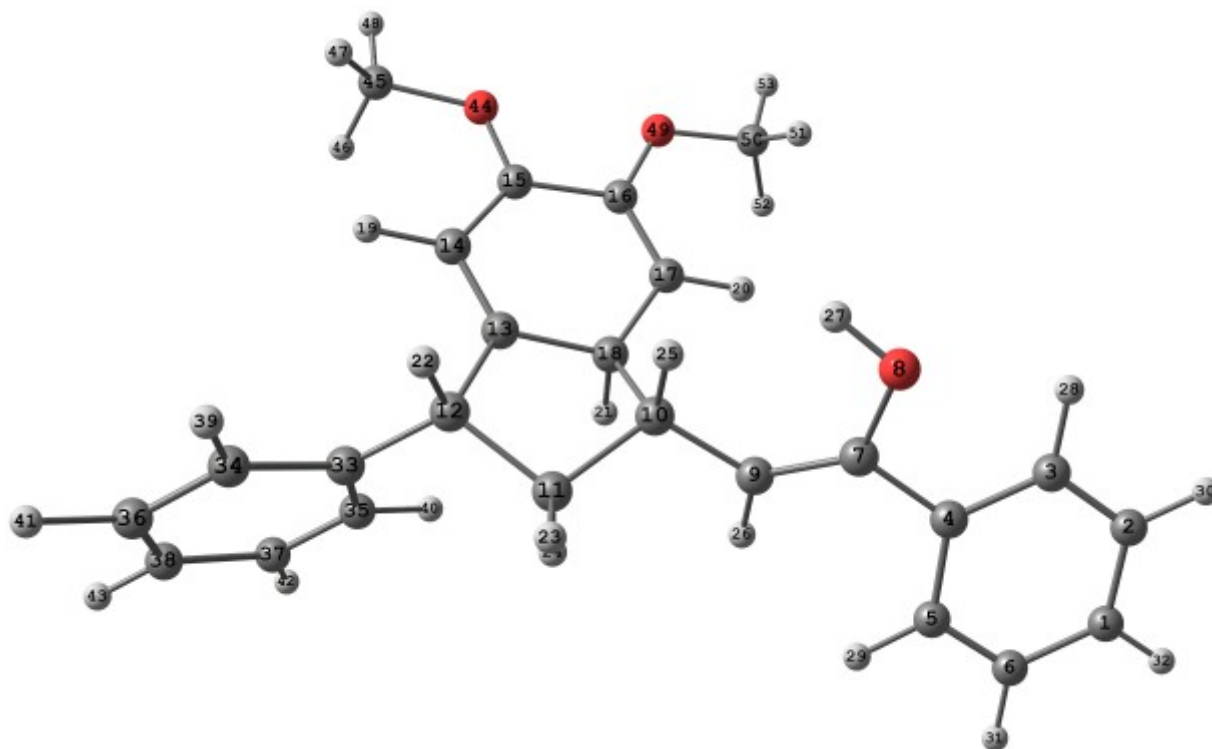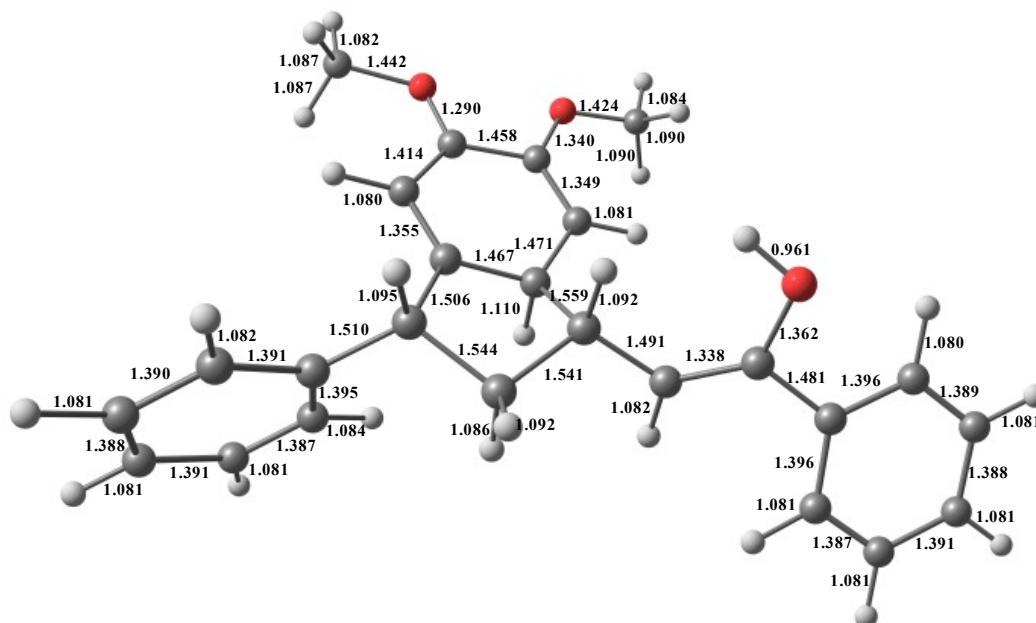

$\pi$ -complex trans-3a

Energy E = -1192.9724723 h,  $G^{298}$  = -1192.584396 h,  $\mu=7.2$  D

Cartesian coordinates, Å

| N  | atom | x         | y         | z         |
|----|------|-----------|-----------|-----------|
| 1  | C    | 0.677569  | 0.903619  | 1.703377  |
| 2  | C    | 1.367390  | 0.404134  | 0.520837  |
| 3  | C    | 1.433712  | 1.167967  | -0.603224 |
| 4  | C    | 0.695149  | 2.359999  | -0.691730 |
| 5  | C    | -0.192734 | 2.754200  | 0.386711  |
| 6  | C    | -0.194921 | 2.039762  | 1.538773  |
| 7  | C    | 1.836847  | -1.024202 | 0.626124  |
| 8  | C    | 1.256369  | -1.541142 | 1.969858  |
| 9  | C    | -0.042613 | -0.752988 | 2.096906  |
| 10 | C    | -1.321037 | -1.187027 | 1.461892  |
| 11 | C    | -1.854570 | -0.934522 | 0.262229  |
| 12 | O    | -1.167230 | -0.229729 | -0.675697 |
| 13 | O    | 0.844340  | 3.003066  | -1.815765 |
| 14 | C    | 0.246925  | 4.266768  | -2.184705 |
| 15 | O    | -0.960903 | 3.831327  | 0.142059  |
| 16 | C    | -1.861325 | 4.232110  | 1.169411  |
| 17 | C    | 3.192863  | -1.377992 | 0.090980  |
| 18 | C    | 4.311265  | -0.625241 | 0.448232  |
| 19 | C    | 5.570471  | -0.966125 | -0.025583 |
| 20 | C    | 5.725906  | -2.067405 | -0.860390 |
| 21 | C    | 4.616705  | -2.822622 | -1.219387 |
| 22 | C    | 3.356479  | -2.478161 | -0.746027 |
| 23 | C    | -3.179560 | -1.447638 | -0.153536 |
| 24 | C    | -3.408902 | -1.775341 | -1.491198 |
| 25 | C    | -4.643591 | -2.268258 | -1.891634 |
| 26 | C    | -5.662700 | -2.435856 | -0.963269 |
| 27 | C    | -5.443558 | -2.104304 | 0.369648  |
| 28 | C    | -4.212920 | -1.608575 | 0.771744  |
| 29 | H    | 1.973994  | 0.853838  | -1.485209 |
| 30 | H    | -0.785126 | 2.360107  | 2.384126  |
| 31 | H    | 1.096400  | -1.539204 | -0.005609 |
| 32 | H    | 1.020411  | -2.603827 | 1.933718  |
| 33 | H    | -0.301004 | -0.628586 | 3.148376  |
| 34 | H    | -2.614851 | -1.668610 | -2.218258 |
| 35 | H    | -4.056754 | -1.324585 | 1.803263  |
| 36 | H    | -4.806150 | -2.525530 | -2.928829 |
| 37 | H    | -6.236724 | -2.219816 | 1.094926  |
| 38 | H    | -6.624554 | -2.816663 | -1.276865 |
| 39 | H    | 1.954282  | -1.378044 | 2.791883  |
| 40 | H    | 4.196363  | 0.233203  | 1.098815  |
| 41 | H    | 2.493075  | -3.066528 | -1.029372 |
| 42 | H    | 6.429606  | -0.373003 | 0.255667  |
| 43 | H    | 4.729748  | -3.677742 | -1.871158 |
| 44 | H    | 6.706443  | -2.333094 | -1.230181 |
| 45 | H    | -1.893777 | -1.846684 | 2.099662  |
| 46 | H    | -2.558524 | 3.426339  | 1.400736  |

|    |   |           |          |           |
|----|---|-----------|----------|-----------|
| 47 | H | -1.313358 | 4.521228 | 2.066307  |
| 48 | H | -2.399930 | 5.085351 | 0.773250  |
| 49 | H | -0.827598 | 4.160912 | -2.271722 |
| 50 | H | 0.504404  | 5.025975 | -1.455139 |
| 51 | H | 0.692692  | 4.489559 | -3.146698 |
| 52 | H | 1.060171  | 0.542736 | 2.626953  |
| 53 | H | -1.784205 | 0.198390 | -1.279653 |

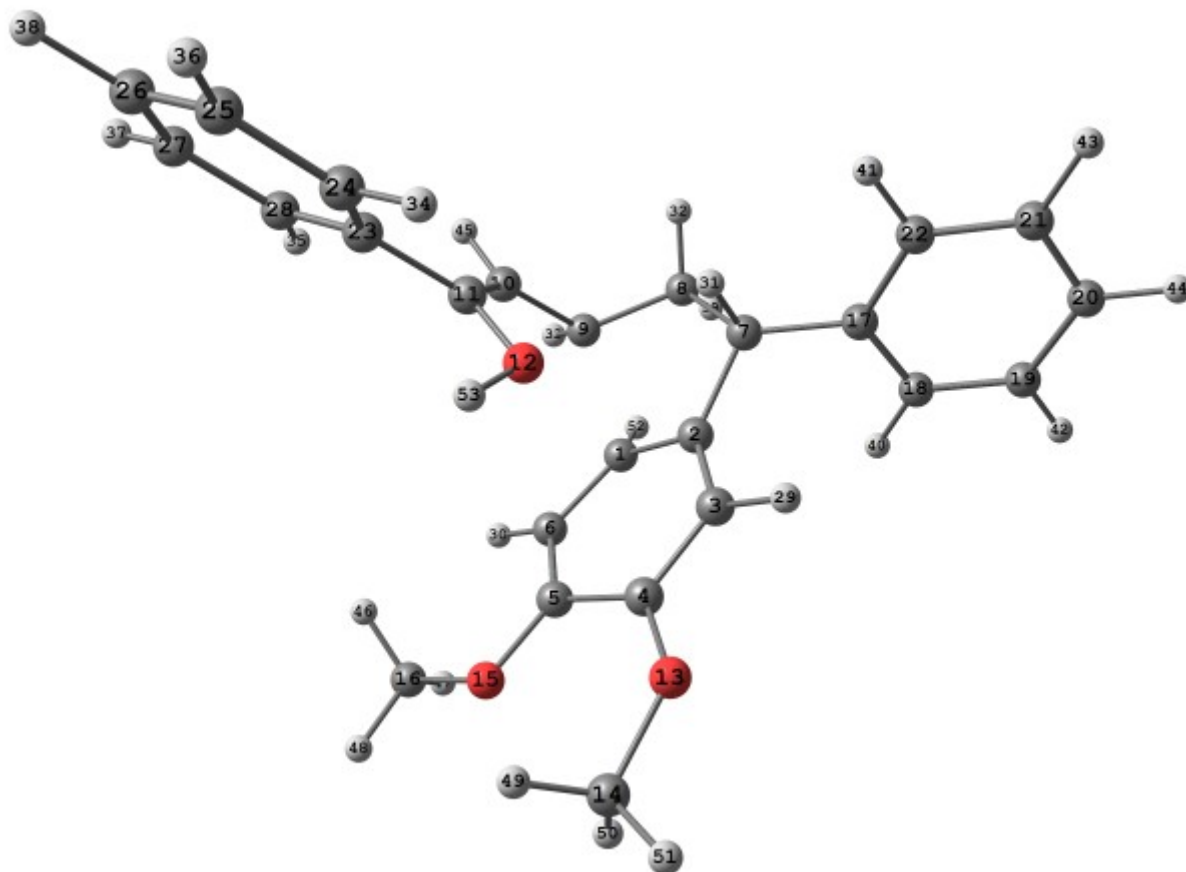

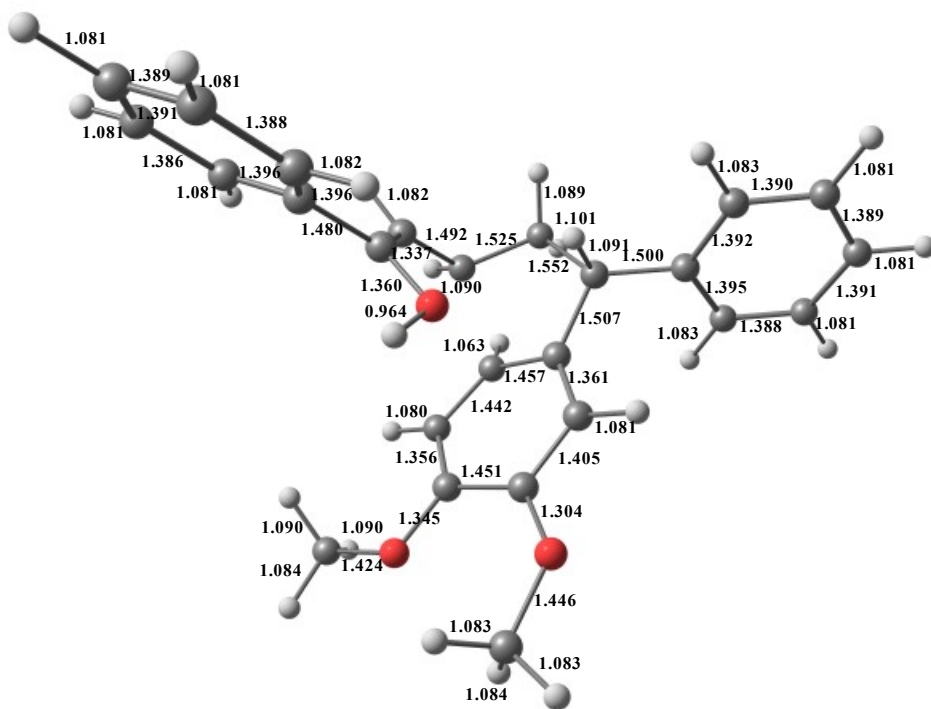

**$\sigma$ -complex trans-3a**

Energy  $E(\text{B3LYP}) = -1193.04042233$  h,  $G^{298} = -1192.652419$  h,  $\mu=12.8$  D

**Cartesian coordinates, Å**

| N  | atom | x         | y         | z         |
|----|------|-----------|-----------|-----------|
| 1  | C    | -1.445527 | 0.060077  | 0.002147  |
| 2  | C    | -2.072143 | 0.892403  | 0.857589  |
| 3  | C    | -0.767853 | 0.557057  | -1.205914 |
| 4  | C    | -1.993565 | 2.296896  | 0.653285  |
| 5  | C    | -0.570786 | 2.013360  | -1.283818 |
| 6  | C    | -1.165773 | 2.854657  | -0.411106 |
| 7  | H    | -2.606292 | 0.547529  | 1.732104  |
| 8  | H    | 0.011670  | 2.399445  | -2.108007 |
| 9  | C    | -1.219785 | -1.422179 | 0.146816  |
| 10 | H    | -0.673172 | -1.555178 | 1.084136  |
| 11 | C    | -0.284451 | -1.760608 | -1.044398 |
| 12 | H    | 0.422078  | -2.547066 | -0.794074 |
| 13 | C    | 0.404330  | -0.433313 | -1.413130 |
| 14 | H    | 0.724793  | -0.427635 | -2.451836 |
| 15 | C    | 1.590985  | -0.100282 | -0.517262 |
| 16 | H    | 1.342829  | -0.229803 | 0.540388  |
| 17 | C    | 2.807970  | -0.945445 | -0.840944 |
| 18 | O    | 2.782610  | -1.745930 | -1.751358 |
| 19 | C    | 4.048011  | -0.755003 | -0.027394 |
| 20 | C    | 5.169281  | -1.525133 | -0.340501 |
| 21 | C    | 4.116693  | 0.165239  | 1.017999  |
| 22 | C    | 6.342393  | -1.377422 | 0.380199  |
| 23 | C    | 5.293552  | 0.312806  | 1.740338  |
| 24 | C    | 6.405272  | -0.457124 | 1.422557  |

|    |   |           |           |           |
|----|---|-----------|-----------|-----------|
| 25 | H | 5.103377  | -2.234114 | -1.153502 |
| 26 | H | 3.260674  | 0.772383  | 1.276452  |
| 27 | H | 7.208138  | -1.975362 | 0.132326  |
| 28 | H | 5.342458  | 1.027876  | 2.549213  |
| 29 | H | 7.321444  | -0.340496 | 1.984753  |
| 30 | H | -0.883141 | -2.102280 | -1.889264 |
| 31 | C | -2.489721 | -2.239442 | 0.227909  |
| 32 | C | -3.480827 | -2.093488 | -0.743077 |
| 33 | C | -2.681431 | -3.157293 | 1.255536  |
| 34 | C | -4.640089 | -2.852853 | -0.688118 |
| 35 | C | -3.841747 | -3.922505 | 1.310743  |
| 36 | C | -4.822692 | -3.772033 | 0.339922  |
| 37 | H | -3.350127 | -1.380034 | -1.548329 |
| 38 | H | -1.919699 | -3.276604 | 2.015396  |
| 39 | H | -5.401075 | -2.727266 | -1.445822 |
| 40 | H | -3.976987 | -4.634882 | 2.112685  |
| 41 | H | -5.725339 | -4.365406 | 0.382423  |
| 42 | H | 1.879760  | 0.948517  | -0.630089 |
| 43 | O | -1.067619 | 4.193855  | -0.418301 |
| 44 | C | -0.245944 | 4.774161  | -1.427279 |
| 45 | H | 0.775937  | 4.404014  | -1.342451 |
| 46 | H | -0.644751 | 4.551055  | -2.416890 |
| 47 | H | -0.270867 | 5.842799  | -1.249254 |
| 48 | O | -2.671958 | 2.986999  | 1.503822  |
| 49 | C | -2.822035 | 4.429135  | 1.556373  |
| 50 | H | -1.869406 | 4.886372  | 1.793848  |
| 51 | H | -3.205822 | 4.792976  | 0.611168  |
| 52 | H | -3.539493 | 4.580591  | 2.353035  |
| 53 | H | -1.475954 | 0.313174  | -2.022542 |

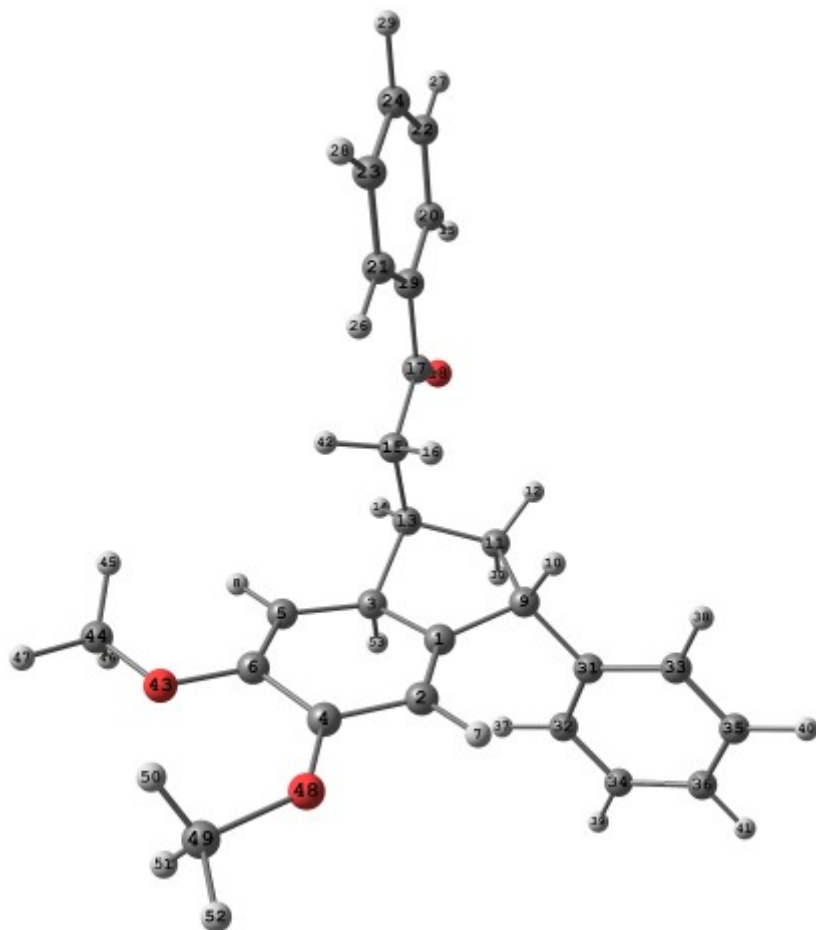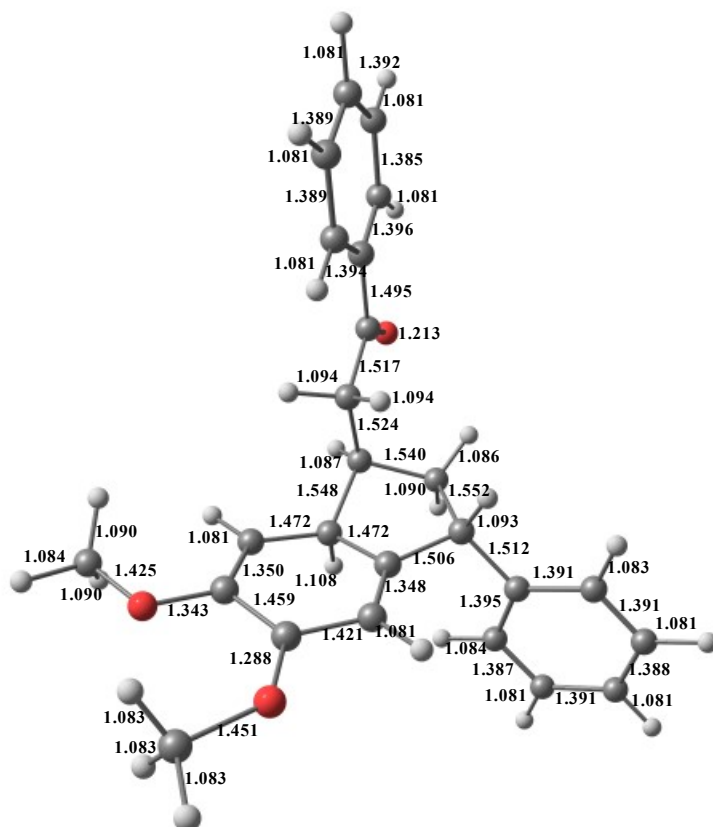

**cis-3a**

**Energy E = -1192.65034289 h, G<sup>298</sup> = -1192.274457 h,  $\mu$ =7.1 D**

**Cartesian coordinates, Å**

| N  | atom | x         | y         | z         |
|----|------|-----------|-----------|-----------|
| 1  | C    | 1.667725  | 0.320606  | -0.931433 |
| 2  | C    | 2.532928  | 1.156105  | -0.235153 |
| 3  | C    | 0.399519  | 0.759419  | -1.264792 |
| 4  | C    | 2.118075  | 2.429205  | 0.113173  |
| 5  | C    | -0.031513 | 2.038111  | -0.927591 |
| 6  | C    | 0.831713  | 2.881230  | -0.234426 |
| 7  | H    | 3.526248  | 0.835961  | 0.054824  |
| 8  | H    | -1.024130 | 2.369414  | -1.196778 |
| 9  | C    | 1.917788  | -1.088801 | -1.431472 |
| 10 | H    | 2.524508  | -1.038560 | -2.339996 |
| 11 | C    | 0.489569  | -1.574973 | -1.793352 |
| 12 | H    | 0.492751  | -2.232363 | -2.660811 |
| 13 | C    | -0.355537 | -0.303641 | -2.029835 |
| 14 | H    | -0.312369 | -0.046163 | -3.092440 |
| 15 | C    | -1.834485 | -0.440959 | -1.682089 |
| 16 | H    | -2.277478 | -1.252282 | -2.266617 |
| 17 | C    | -2.145025 | -0.700344 | -0.221010 |
| 18 | O    | -1.271760 | -0.811254 | 0.613290  |
| 19 | C    | -3.586145 | -0.819626 | 0.180304  |
| 20 | C    | -3.882519 | -1.046884 | 1.525063  |
| 21 | C    | -4.628130 | -0.711355 | -0.740301 |
| 22 | C    | -5.197883 | -1.163957 | 1.943623  |
| 23 | C    | -5.946990 | -0.829201 | -0.320650 |
| 24 | C    | -6.232968 | -1.054890 | 1.019566  |
| 25 | H    | -3.068411 | -1.130003 | 2.230900  |
| 26 | H    | -4.423481 | -0.535414 | -1.786449 |
| 27 | H    | -5.419255 | -1.340125 | 2.986991  |
| 28 | H    | -6.748921 | -0.743238 | -1.040154 |
| 29 | H    | -7.259948 | -1.145715 | 1.345340  |
| 30 | H    | 0.081381  | -2.129507 | -0.950551 |
| 31 | C    | 2.630204  | -1.979347 | -0.441387 |
| 32 | C    | 2.111244  | -2.146792 | 0.845008  |
| 33 | C    | 3.801660  | -2.648178 | -0.780974 |
| 34 | C    | 2.749344  | -2.964938 | 1.765065  |
| 35 | C    | 4.444398  | -3.471975 | 0.139411  |
| 36 | C    | 3.920513  | -3.631969 | 1.414477  |
| 37 | H    | 1.198606  | -1.627731 | 1.115653  |
| 38 | H    | 4.216167  | -2.524656 | -1.773888 |
| 39 | H    | 2.335425  | -3.084780 | 2.757285  |
| 40 | H    | 5.353341  | -3.986242 | -0.141746 |
| 41 | H    | 4.417987  | -4.270259 | 2.131481  |
| 42 | H    | -2.379454 | 0.458916  | -1.979776 |
| 43 | O    | 0.528496  | 4.148996  | 0.146866  |
| 44 | C    | -0.768408 | 4.627302  | -0.169704 |
| 45 | H    | -0.925620 | 4.644908  | -1.249063 |
| 46 | H    | -1.537164 | 4.012492  | 0.300912  |



|    |   |           |          |          |
|----|---|-----------|----------|----------|
| 47 | H | -0.820737 | 5.637794 | 0.221981 |
| 48 | O | 2.977824  | 3.271940 | 0.775212 |
| 49 | C | 2.701581  | 3.371939 | 2.171585 |
| 50 | H | 1.689990  | 3.741923 | 2.337986 |
| 51 | H | 2.823122  | 2.397992 | 2.649056 |
| 52 | H | 3.421023  | 4.073665 | 2.584303 |

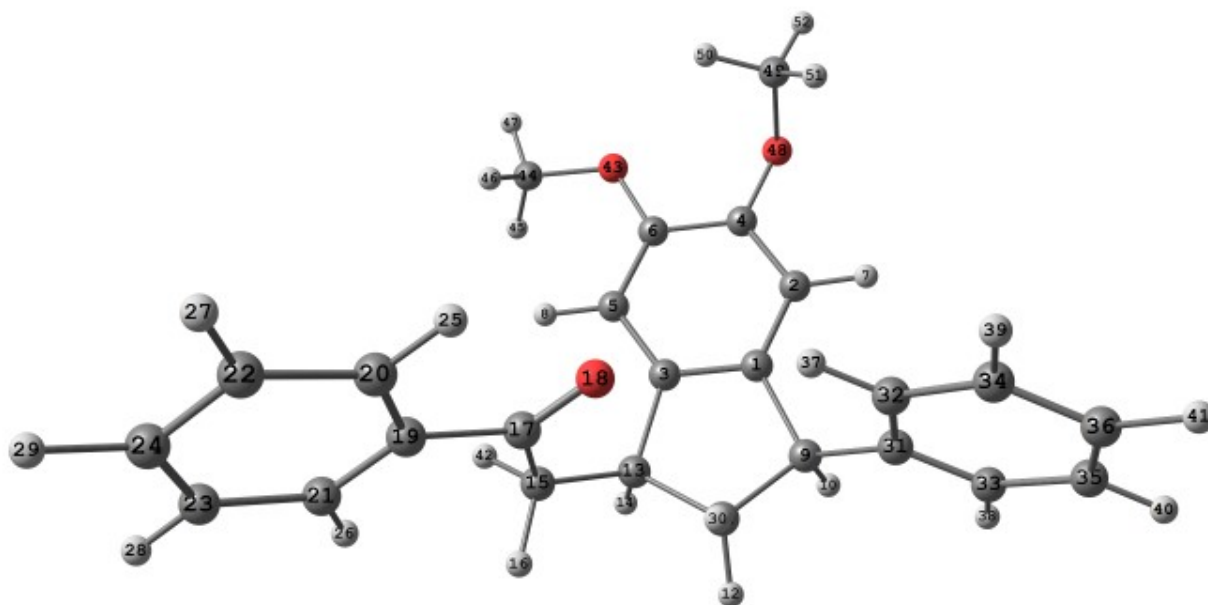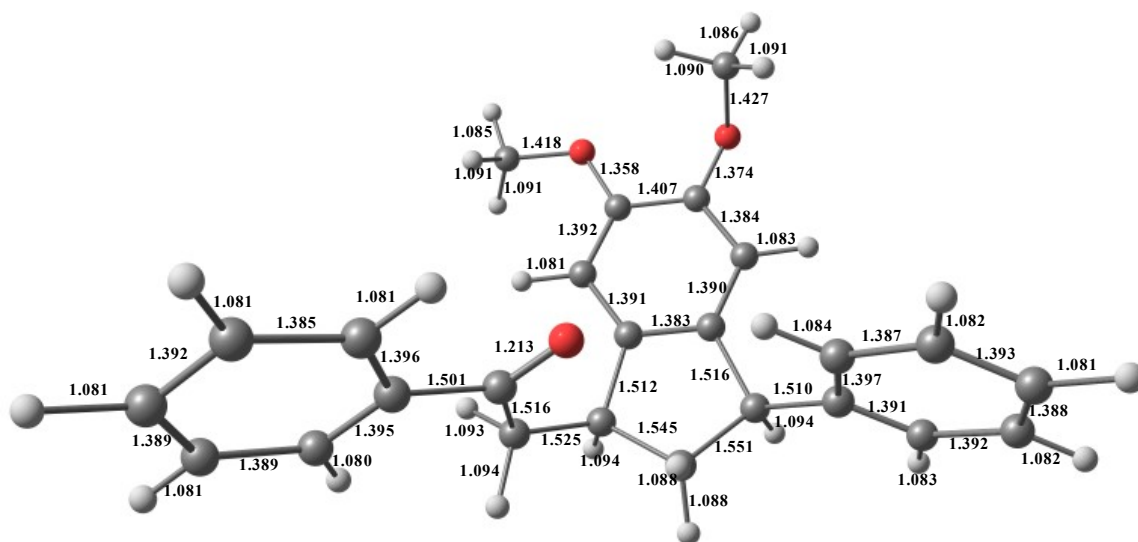

**trans-3a**Energy E = -1192.65184283 h, G<sup>298</sup> = -1192.275523 h,  $\mu=3.4$  D**Cartesian coordinates, Å**

| N  | atom | x         | y         | z         |
|----|------|-----------|-----------|-----------|
| 1  | C    | -1.382516 | 0.008389  | 0.254839  |
| 2  | C    | -2.498224 | 0.570182  | 0.865489  |
| 3  | C    | -0.538222 | 0.796910  | -0.506776 |
| 4  | C    | -2.752325 | 1.919847  | 0.706178  |
| 5  | C    | -0.778190 | 2.158082  | -0.674443 |
| 6  | C    | -1.893653 | 2.725603  | -0.066989 |
| 7  | H    | -3.182495 | -0.021569 | 1.461045  |
| 8  | H    | -0.107864 | 2.757953  | -1.273350 |
| 9  | C    | -0.895342 | -1.425660 | 0.306691  |
| 10 | H    | -0.370098 | -1.588236 | 1.252179  |
| 11 | C    | 0.122193  | -1.460294 | -0.863976 |
| 12 | H    | 0.929797  | -2.168830 | -0.689440 |
| 13 | C    | 0.624097  | -0.009687 | -1.039882 |
| 14 | H    | 0.821629  | 0.212398  | -2.088131 |
| 15 | C    | 1.892573  | 0.281347  | -0.239287 |
| 16 | H    | 1.776055  | -0.051817 | 0.796544  |
| 17 | C    | 3.131175  | -0.364523 | -0.823356 |
| 18 | O    | 3.081486  | -1.005249 | -1.852407 |
| 19 | C    | 4.434587  | -0.180970 | -0.107366 |
| 20 | C    | 5.575528  | -0.790543 | -0.630861 |
| 21 | C    | 4.537985  | 0.582111  | 1.055067  |
| 22 | C    | 6.800845  | -0.639971 | -0.002170 |
| 23 | C    | 5.766879  | 0.734439  | 1.684188  |
| 24 | C    | 6.897687  | 0.124334  | 1.156920  |
| 25 | H    | 5.485771  | -1.379122 | -1.532807 |
| 26 | H    | 3.667508  | 1.063419  | 1.477055  |
| 27 | H    | 7.681034  | -1.114351 | -0.412821 |
| 28 | H    | 5.839154  | 1.328755  | 2.584029  |
| 29 | H    | 7.854340  | 0.243932  | 1.646555  |
| 30 | H    | -0.400431 | -1.768162 | -1.770151 |
| 31 | C    | -1.988126 | -2.463137 | 0.199546  |
| 32 | C    | -2.923250 | -2.392917 | -0.834909 |
| 33 | C    | -2.087463 | -3.505754 | 1.115891  |
| 34 | C    | -3.928053 | -3.341481 | -0.951626 |
| 35 | C    | -3.093992 | -4.461055 | 1.002924  |
| 36 | C    | -4.016316 | -4.381796 | -0.030930 |
| 37 | H    | -2.864401 | -1.581221 | -1.550346 |
| 38 | H    | -1.372452 | -3.571074 | 1.926596  |
| 39 | H    | -4.645184 | -3.269727 | -1.758022 |
| 40 | H    | -3.156638 | -5.263695 | 1.725093  |
| 41 | H    | -4.799858 | -5.121499 | -0.120109 |
| 42 | H    | 2.073819  | 1.358775  | -0.187888 |
| 43 | O    | -2.237951 | 4.034929  | -0.156787 |
| 44 | C    | -1.398120 | 4.873570  | -0.933730 |
| 45 | H    | -0.385982 | 4.896425  | -0.527457 |
| 46 | H    | -1.367618 | 4.540780  | -1.972227 |

|    |   |           |          |           |
|----|---|-----------|----------|-----------|
| 47 | H | -1.833581 | 5.865957 | -0.881450 |
| 48 | O | -3.833808 | 2.491713 | 1.329373  |
| 49 | C | -4.946267 | 2.684545 | 0.456619  |
| 50 | H | -4.668339 | 3.315112 | -0.387893 |
| 51 | H | -5.310935 | 1.721874 | 0.094086  |
| 52 | H | -5.721986 | 3.173362 | 1.039171  |

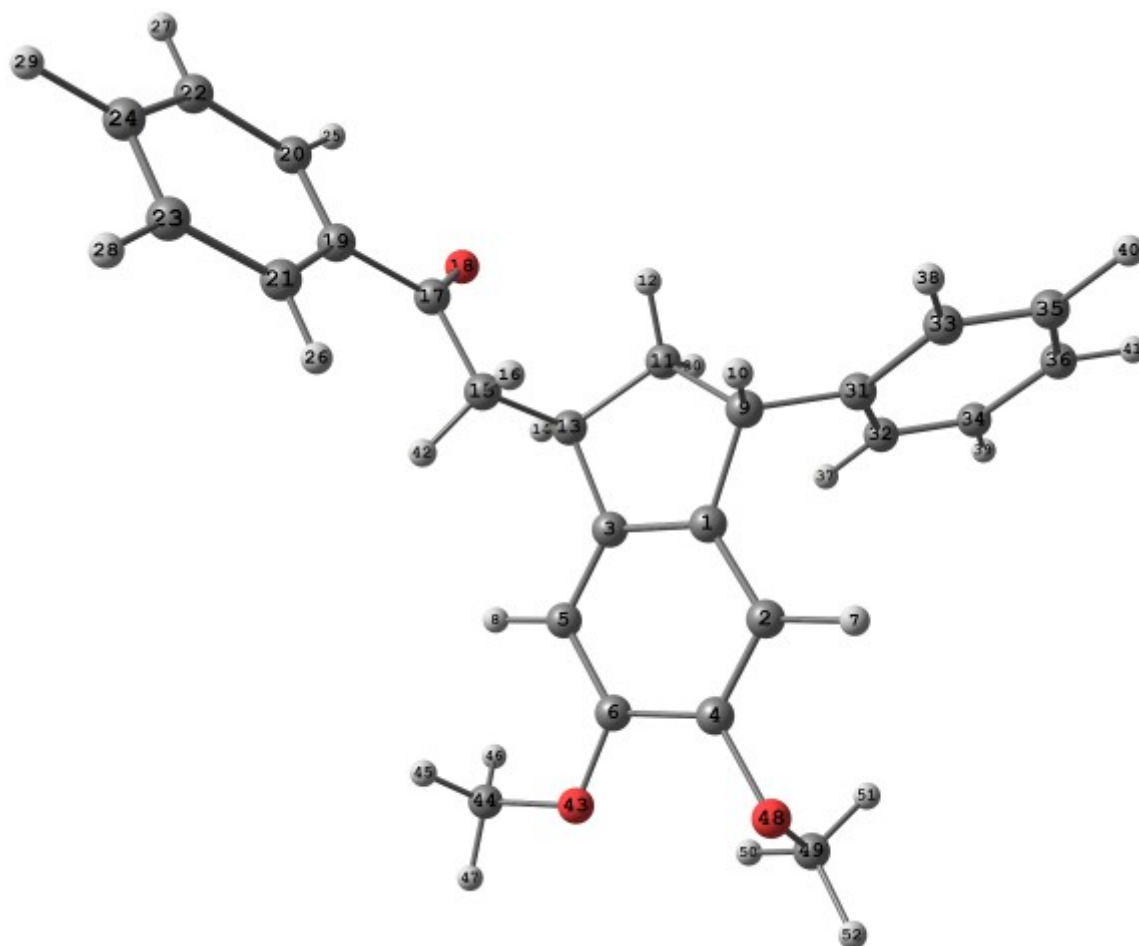

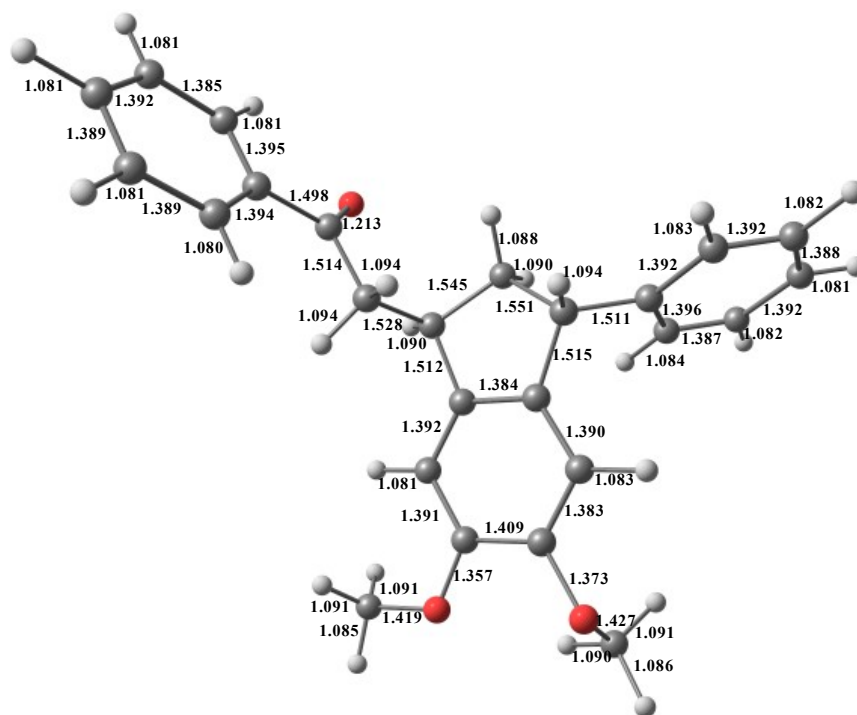

Supplement: d2nj01828d1.pdf [file d2nj01828d1.pdf]
